# Supplementary material for: Capture at the single cell level of metabolic modules distinguishing aggressive and indolent glioblastoma cells
Source: Acta Neuropathol Commun. 2019 Oct 16;7:155. doi: 10.1186/s40478-019-0819-y (PMC6796454; doi:10.1186/s40478-019-0819-y)
Supplement: Supplementary file 5 — Additional file 5: GO analysis of genes describing the seven clusters identified upon grouping analysis using standardized data. [file 40478_2019_819_MOESM5_ESM.xlsx]

## Sheet: Legend
Additional file 5 (related to Fig. 1). GO analysis of genes describing the seven clusters identified upon grouping analysis using standardized data. DAVID toolkit. Sheet 1: Legend. Sheet 2: Lists of genes identified in DAVID toolkit and upregulated in a given group as compared to their mean across all cell groups. Following sheets: GO analysis results for clusters 1-7.
Saurty-Seerunghen MS et al. Capture at the single cell level of metabolic modules distinguishing aggressive and indolent glioblastoma cells.

## Sheet: Gene lists used for GO
List of genes used for GO analysis of standardized data. Cell clusters and genes describing the clusters were obtained from HCPC analysis.
GO analysis performed on genes whose mean expression in one cluster is greater than its mean across all cells.
Cluster1	Cluster2	Cluster3	Cluster4	Cluster5	Cluster6	Cluster7
ABCC8	ABCA6	A2ML1	AAR2	AAMP	AAAS	AAGAB
AGTR1	ABCC3	AASS	AARS	AARS	AADAT	AAMDC
ALDH1A3	ABCG4	ABAT	ABCA1	AASS	AAGAB	AAMP
AMELX	ABI3	ABCA10	ABCC1	ABCA2	AAMP	AARS
ANKRD18A	ACTR3C	ABCA2	ABCC13	ABCB7	ABCA12	AASDHPPT
ANKRD30B	ADAM3A	ABCA5	ABCF1	ABCB9	ABCB10	AATF
ANKRD30BL	ANKRD10	ABCA7	ABCG8	ABCC3	ABCE1	ABCB7
ANKRD34B	AP1S3	ABCA8	ABHD5	ABCC4	ABCF1	ABCE1
ANKRD62P1-PARP4P3	APOC1P1	ABCA9	ABL1	ABCD2	ABCG2	ABCF2
AOX2P	ARID5B	ABCC6P2	ABL2	ABCD3	ABHD12	ABCF3
APOBR	ATF3	ABCC9	ABLIM3	ABCF2	ABHD17B	ABHD11
ARHGEF5	ATP6V0C	ABCD2	ABTB2	ABHD10	ABHD17C	ABHD2
ASMTL-AS1	AVIL	ABCD3	ACBD3	ABHD12	ABHD2	ABI1
ATP2B3	AWAT1	ABHD10	ACE2	ABHD16A	ABHD3	ABI3BP
ATP8B2	B2M	ABHD14A	ACIN1	ABHD17C	ABT1	ABLIM1
BBC3	B3GALT5	ABHD15	ACP1	ABHD2	ACAD9	ABRACL
BRDT	BLID	ABHD3	ACRBP	ABHD6	ACADM	ACADM
BRSK1	BMPER	ABHD4	ACSL1	ABI1	ACAP3	ACBD3
C9	BTBD19	ACAA2	ACSL4	ABI2	ACAT2	ACBD6
CATSPER2	BTG2	ACACB	ACTN1	ABITRAM	ACER3	ACD
CCDC110	C10orf99	ACAP2	ACTN3	ABLIM1	ACO2	ACLY
CCDC122	C1R	ACBD4	ACTR3	ABRACL	ACOT2	ACOT13
CCDC197	C1RL-AS1	ACBD7	ACVR1	ACAA1	ACOT7	ACOT7
CDKN1C	C6orf58	ACO1	ADAM17	ACADM	ACP4	ACOT9
CFAP97D1	C8orf76	ACOT1	ADAM20P1	ACADVL	ACSBG2	ACP1
COL27A1	CBX8	ACOT11	ADAP1	ACAT1	ACSL3	ACP6
CPSF4L	CCBE1	ACOT6	ADCY8	ACBD3	ACTL10	ACSL4
CRISP1	CCL18	ACOX1	ADGRG3	ACBD6	ACTL6A	ACTB
CRYBG2	CCN4	ACSBG1	ADIPOR1	ACER3	ACTN4	ACTL6A
CSKMT	CD44	ACSF2	ADM	ACHE	ACYP1	ACTN1
DAPP1	CD63	ACSL5	ADRM1	ACLY	ADAL	ACTN4
DOC2A	CD74	ACSL6	AFAP1L1	ACO2	ADAM15	ACTR10
FAM153B	CEBPB	ACSS1	AFF3	ACOT13	ADAR	ACTR1A
FAM163A	CFB	ACTG1	AFF4	ACOT9	ADAT1	ACTR2
FAM166A	CFI	ACVRL1	AGAP1	ACP1	ADCY1	ACTR3
FAM216B	CHI3L1	ACY1	AGAP6	ACSL3	ADCY3	ACTR3B
FBXL19	CHI3L2	ACYP2	AGFG1	ACSS3	ADGRA3	ACTR5
FBXO47	CHIA	ADAM22	AGPAT4	ACTA1	ADGRB2	ACTR6
FBXO48	CHRFAM7A	ADAMTS6	AHR	ACTB	ADGRL1	ACTR8
FER1L4	CIITA	ADAMTSL2	AHRR	ACTG1	ADH5	ADAM10
FSIP2	CILP2	ADAR	AHSA1	ACTN1	ADNP2	ADAM12
GJB6	CIRBP-AS1	ADCK1	AICDA	ACTN4	ADPGK	ADAM17
GPR12	COL1A2	ADCK2	AIFM2	ACTR10	ADPRHL2	ADAM9
GRIN2D	COL8A2	ADCY2	AK2	ACTR3	ADRM1	ADGRE5
HES1	COX6B2	ADCY8	AK4	ADAM10	ADSL	ADH5
HHLA2	CPZ	ADCYAP1R1	AKAP12	ADAM9	AEN	ADIPOR1
HIGD2B	CRIP1	ADD1	AKAP8	ADAMTS18	AES	ADK
HIST1H1B	CRYAA	ADD3	AKAP9	ADAMTS9	AFG3L1P	ADPGK
HIST1H2AE	CRYAB	ADH5	AKIRIN2	ADAR	AGA	ADPRH
HIST1H2AK	CSRNP1	ADHFE1	AKR1B10	ADAT1	AGBL5	ADPRHL2
HIST1H2AL	CYP2E1	ADRB1	AKT3	ADCY9	AGPAT1	ADRM1
HIST1H2AM	CYP4F24P	ADRB2	ALDH1L2	ADD1	AHCY	ADSL
HIST1H2BB	DBH	AES	ALDH8A1	ADD3	AIFM1	ADSS
HIST1H2BN	DEPP1	AGGF1	ALDOA	ADGRB2	AIG1	AEN
HIST1H3A	DIP2A	AGPAT3	ALG2	ADGRG1	AIM2	AFG3L2
HIST1H3D	DKK1	AGT	ALG9	ADI1	AIMP2	AGFG1
HIST1H3H	DPYD	AHCYL1	ALKBH5	ADIPOR1	AK2	AGK
HIST1H3I	DZIP1	AHCYL2	ALLC	ADORA1	AK3	AGPAT2
HIST1H3J	ECPAS	AHDC1	ALPG	ADPGK	AKAP13	AGPAT5
HIST1H4A	EDIL3	AIF1L	ALS2	ADRM1	AKAP5	AGPS
HIST1H4B	EEF1A1	AIFM3	ALS2CR12	AEBP1	AKAP8	AGTRAP
HIST1H4E	EFEMP1	AK1	AMD1	AEBP2	AKR1A1	AHCY
HIST2H3D	EGR1	AK3	AMDHD2	AEN	AKR7A2	AIG1
HNRNPA3P1	ELL2	AK7	AMPD3	AES	ALDH16A1	AIMP2
HRG	ENPP2	AK8	ANAPC2	AFG3L2	ALDH18A1	AIP
HSF4	EPB41L3	AK9	ANG	AGFG2	ALDH7A1	AK2
ICAM5	F13A1	AKAP1	ANGPTL4	AGK	ALG3	AK4
IFITM4P	FAM133A	AKAP10	ANKHD1	AGPAT1	ALG5	AKIP1
IL17REL	FBXO32	AKR7A2	ANKLE2	AGPAT3	ALG6	AKIRIN1
IL5RA	FEZF2	AKT3	ANKRD12	AGPAT5	ALG8	AKIRIN2
ITIH3	FIGNL2	ALAD	ANKRD33B	AGT	ALKAL2	AKR1A1
KMT2E-AS1	FOXE1	ALB	ANKRD37	AGTRAP	ALKBH3	AKR1B1
L1TD1	FTH1	ALCAM	ANKRD49	AHCY	ALMS1	AKR7A2
LAMC2	FTL	ALDH1A1	ANKS4B	AHCYL2	ALYREF	AKTIP
LILRB3	GABRP	ALDH1L1	ANKZF1	AHSA1	AMOTL1	ALAS1
LINC00273	GADD45A	ALDH2	ANO10	AIF1L	AMPH	ALDH18A1
LINC00324	GBP2	ALDH3A2	ANO7	AIP	ANAPC11	ALDH1B1
LINC00487	GLRX	ALDH4A1	ANPEP	AK2	ANAPC15	ALG1
MATK	GNG5	ALDH5A1	ANXA2	AK4	ANAPC5	ALG14
MCOLN3	HLA-B	ALDH6A1	ANXA2P1	AKIRIN1	ANK2	ALG2
MEFV	HLA-DRA	ALDH7A1	ANXA2P2	AKIRIN2	ANKFY1	ALG5
MIR191	HLA-DRB5	ALDH9A1	ANXA2P3	AKR1A1	ANKLE1	ALG8
MIR3153	HNRNPU	ALDOC	ANXA3	AKR1B1	ANKRD13C	ALG9
MIR3188	HOXC11	ALG6	ANXA4	AKR7A2	ANKRD35	ALKBH2
MIR3190	HSPA12B	ALOX12B	ANXA5	AKT1S1	ANKRD36	ALKBH3
MIR320A	HUS1B	AMOT	AOX1	ALDH18A1	ANKS1A	ALKBH4
MIR3648-1	IER5L	AMZ1	AP1AR	ALDH1L1	ANLN	ALKBH5
MIR3687-1~withdrawn	IFITM2	AMZ2	AP3S1	ALDH9A1	ANP32A	ALYREF
MIR3928	IFITM3	AMZ2P1	APBB3	ALDOA	ANP32B	AMD1
MIR425	IGFBP7	ANGPT1	APC2	ALG14	ANP32E	AMMECR1
MIR4461~withdrawn	IGFN1	ANGPTL1	APOF	ALKBH4	AP1B1	AMOTL1
MIR4651	IGSF9B	ANK2	ARCN1	ALKBH6	AP1M1	AMPD2
MIR548N	IL15RA	ANKFN1	ARF1	ALKBH7	AP2B1	ANAPC11
MIR563	IL18BP	ANKFY1	ARF4	AMPD2	AP2M1	ANAPC13
MIR663A	IL1RAP	ANKRD20A11P	ARF6	AMT	AP2S1	ANAPC15
MIR663B	IMPG1	ANKRD20A5P	ARFGEF2	AMZ2	AP3M2	ANAPC16
MIR670	ING5	ANKRD20A8P	ARFGEF3	ANAPC11	APAF1	ANAPC5
MOCOS	ITGA11	ANKRD20A9P	ARHGAP10	ANAPC13	APH1A	ANGPTL2
MROH5	ITM2B	ANKRD40	ARHGAP15	ANAPC5	API5	ANKEF1
MROH7	JUND	ANKRD46	ARHGAP21	ANGPT1	APLP1	ANKLE2
MTRNR2L1	KCNK3	ANKRD6	ARHGAP27	ANKRD35	APMAP	ANKRD13C
MTRNR2L10	KIAA0895L	ANKUB1	ARHGAP45	ANKRD36	APOBEC3B	ANKRD27
MTRNR2L2	KLF5	ANO5	ARHGDIA	ANKRD40	APOBEC3G	ANP32B
MTRNR2L8	KLF6	ANTXR1	ARHGEF2	ANKRD50	APOLD1	ANXA2
MYLPF	KMT2E-AS1	ANXA5	ARHGEF35	ANO6	APOPT1	ANXA2P2
MYO1G	LACC1	ANXA6	ARHGEF37	ANP32B	APPL1	ANXA2P3
MYPN	LGALS9	APBA2	ARHGEF39	ANP32E	AQP2	ANXA7
NCF1	LINC-PINT	APBB2	ARID3C	ANXA2	AQP6	AP1M1
NCF1C	LINC00472	APC	ARL1	ANXA2P2	AQP9	AP1S1
NPM2	LRP2	APC2	ARL13B	ANXA5	AQR	AP2B1
OR5AU1	LSP1	APMAP	ARPC1A	AOC1	ARCN1	AP2M1
OR6Y1	LTF	APOD	ARPC1B	AP1B1	ARFGEF2	AP2S1
OR7E12P	MALAT1	APOE	ARPC2	AP1M1	ARHGAP11A	AP3D1
PART1	MAP4K3	APPBP2	ARRDC2	AP1S2	ARHGAP11B	AP3M1
PCSK2	MC3R	APPL2	ARRDC3	AP2M1	ARHGAP33	AP3S1
PDE6C	MCL1	AQP1	ARSJ	AP2S1	ARHGAP35	AP3S2
PEAK3	MDK	AQP4	ARSK	AP3S1	ARHGDIA	AP5M1
PERM1	MICAL3	AQP4-AS1	ASB5	APC	ARID1A	AP5S1
PIP5K1P1	MIR100HG	ARAP2	ASNS	APEH	ARID2	APEX1
PKD2L1	MIR1248	ARHGAP24	ASPRV1	APEX1	ARL13B	APEX2
PLEKHG4	MIR221	ARHGAP31	ATAD1	APLP2	ARL2BP	APH1A
PLVAP	MIR23B	ARHGAP32	ATF1	APMAP	ARL6IP1	API5
POU3F1	MIR27B	ARHGEF11	ATF4	APOBEC3C	ARL6IP6	APIP
PPP1R3C	MIR302B	ARHGEF26	ATG10	APOL6	ARMC1	APLP2
PRAMEF14	MIR3661	ARHGEF26-AS1	ATG12	APOO	ARMC6	APMAP
PTGER3	MIR4269	ARHGEF4	ATG13	APOPT1	ARMC7	APOBEC3C
RASGRF1	MIR4649	ARHGEF6	ATG14	APP	ARMT1	APOO
RASL11A	MIR493	ARL3	ATG2A	APRT	ARNTL2	APOPT1
RBM46	MIR548A2	ARL5A	ATP13A3	AQP4	ARPC1A	APP
RNF207	MIR645	ARL6IP1	ATP1B3	ARAF	ARPC1B	APPL2
RPPH1	MIR708	ARL6IP6	ATP1B4	ARCN1	ARPC3	APRT
RSPO1	MNT	ARMC2	ATP2C2	ARF1	ARPC4	APTX
RXFP2	MPEG1	ARMC3	ATP6V0D2	ARF3	ARPC5L	AQR
S100A7	MUC21	ARMH1	ATP6V0E1	ARF4	ARPP19	ARCN1
SCAR3	MVP	ARNT2	ATP6V1B2	ARF5	ARRB2	ARF1
SLC26A9	MYL6	ARPP21	ATP6V1C1	ARFGAP3	ARSG	ARF4
SLC27A6	N4BP2L2	ARSG	ATP6V1D	ARGLU1	ARVCF	ARF6
SLC30A8	NNMT	ASB16	ATP6V1E1	ARHGAP1	ASAP1	ARFGAP2
SLC6A14	NOS1AP	ASB16-AS1	ATP6V1G1	ARHGAP26	ASB11	ARFGAP3
SLC7A14	NR1I2	ASCL1	ATP7A	ARHGDIA	ASB13	ARFGEF2
SNHG9	NTNG1	ASMTL	ATP7B	ARHGEF26	ASB16-AS1	ARFIP2
SNORA10	NUGGC	ASPG	ATP8B3	ARHGEF3	ASF1A	ARHGAP17
SNORA46	NUTM2D	ASPH	ATXN1L	ARHGEF40	ASF1B	ARHGAP29
SNORA48	OR51B4	ASRGL1	ATXN2L	ARHGEF6	ASH2L	ARL1
SNORA57	OTUD4	ASTN1	ATXN3	ARID1A	ASIC4	ARL14EP
SNORA78	OVCH1	ASTN2	AUH	ARID2	ASNS	ARL16
SNORD100	P2RX6P	ASXL3	AUP1	ARID5A	ASPH	ARL2
SNORD104	PCDHGA3	ATG4C	AXIN1	ARID5B	ASPM	ARL2BP
SNORD12C	PCP2	ATP13A4	AXL	ARL14EP	ASPN	ARL4A
SNORD15B	PCSK6	ATP13A5	BACE2	ARL2	ASRGL1	ARL6IP4
SNORD22	PDE6H	ATP1A2	BACH1	ARL2BP	ATAD2	ARL6IP5
SNORD30	PDGFRB	ATP1A4	BAG3	ARL3	ATAD3A	ARL6IP6
SNORD32A	PDIA3P1	ATP1B2	BAG5	ARL4A	ATAD5	ARL8B
SNORD33	PDZK1P1	ATP2B2	BAG6	ARL5A	ATAT1	ARMC1
SNORD34	PHF21B	ATP2B4	BBC3	ARL6IP1	ATF1	ARMC10
SNORD35A	PLEK	ATP5F1A	BCAR3	ARL6IP4	ATF4	ARMC6
SNORD42B	PMAIP1	ATP5F1B	BCAS2	ARL6IP5	ATF6	ARMCX3
SNORD63	PODN	ATP6AP2	BCAT2	ARL8A	ATF6B	ARMCX6
SNORD72	PTMA	ATP6V0E2	BCCIP	ARMC10	ATF7IP	ARMT1
SOX1	RAB11FIP1	ATP8A1	BCKDK	ARMC8	ATG12	ARNTL2
SP7	RABL6	ATP9A	BCL10	ARPC1A	ATG3	ARPC1A
SSUH2	RGS2	ATPAF2	BCL2A1	ARPC1B	ATP13A4	ARPC1B
SSX1	RNF125	ATRAID	BCL2L1	ARPC2	ATP1B3	ARPC2
SSX3	ROPN1	ATRX	BCL2L2-PABPN1	ARPC3	ATP5F1B	ARPC3
STPG2	RPL13AP6	ATXN1	BCL7B	ARPC4	ATP5PB	ARPC4
TAFA3	RPL30	ATXN10	BCL7C	ARPC5	ATP6V0B	ARPC5
TBC1D3P2	RPL34	AUTS2	BCL9L	ARPP19	ATP6V0D1	ARPC5L
TCHH	RPL41	B3GALT2	BDKRB1	ARRDC4	ATP6V1D	ARSB
TEDDM1	RPLP1	B3GAT2	BDP1	ARSA	ATP9B	ASAH1
TMEM212	RPLP2	B4GALNT4	BEND5	ARSF	ATRAID	ASB6
TMEM213	RPS14	BACH2	BEST1	ARSJ	ATRIP	ASCC2
UGT2B15	RPS15	BAIAP3	BET1	ASAH1	ATXN2L	ASH2L
UNC93A	RPS19	BANK1	BEX2	ASAP3	AUNIP	ASL
VSIG8	RPS21	BAZ2B	BHLHE40	ASIC1	AURKA	ASNS
VWC2L	RPS25	BBOF1	BHLHE40	ASNSD1	AURKAIP1	ASNSD1
ZNF705D	RPS27	BBOX1	BICD2	ASPHD1	AURKB	ASPHD1
ZNF787	RPS28	BBS1	BICDL2	ASRGL1	AUTS2	ATAD1
ZNF812P	RRAD	BBS2	BIRC3	ASTN1	AVL9	ATAD3A
ZNRF2P2	RTN4	BCAN	BLOC1S6	ASXL1	AZIN1	ATF2
	RUNX1	BCHE	BLZF1	ATCAY	B3GALNT1	ATF5
	RUSC1-AS1	BCKDHB	BMP2	ATF3	B3GAT1	ATG101
	S100A11	BCL2	BMP8B	ATF7	B3GNT7	ATG12
	SEM1	BCR	BMT2	ATF7IP	B3GNT9	ATG13
	SERF2	BDH1	BNIP3	ATG12	BABAM1	ATG3
	SERPING1	BDH2	BNIP3L	ATIC	BAG1	ATG4B
	SIAH3	BEX1	BOD1	ATN1	BAG2	ATG5
	SIX5	BEX2	BOK	ATOH8	BANF1	ATG7
	SLC10A6	BEX4	BRD2	ATOX1	BANP	ATG9A
	SLC25A37	BIRC8	BRD4	ATP13A3	BARD1	ATIC
	SLC25A41	BLCAP	BRI3	ATP1A1	BAX	ATL3
	SLC2A2	BMP7	BRIP1	ATP1B1	BAZ1A	ATMIN
	SLC3A1	BMPR1B	BRIX1	ATP1B2	BAZ1B	ATOX1
	SLC46A2	BPTF	BRMS1	ATP2A2	BCAP29	ATP11C
	SLFNL1	BRAT1	BRMS1L	ATP2B1	BCL2L11	ATP1A1
	SMCO1	BRD3	BTG1	ATP2C1	BCL7B	ATP1B3
	SNORA27	BRD3OS	BTG3	ATP5F1A	BCL7C	ATP2B1
	SNORA80E	BRF1	BUB3	ATP5F1B	BCLAF1	ATP2C1
	SNORD113-2	BTBD17	BUD31	ATP5F1C	BCOR	ATP5F1A
	SNORD114-4	C10orf95	C10orf90	ATP5F1D	BCR	ATP5F1B
	SNORD116-15	C11orf71	C11orf80	ATP5F1E	BEND5	ATP5F1C
	SNORD16	C11orf87	C12orf56	ATP5IF1	BEST3	ATP5IF1
	SNORD50B	C12orf76	C14orf119	ATP5MC1	BET1L	ATP5MD
	SOD2	C14orf132	C14orf28	ATP5MC2	BFSP1	ATP5PB
	SPATA13	C16orf45	C15orf41	ATP5MC3	BIN1	ATP5PD
	SPATA46	C16orf96	C15orf62	ATP5MD	BIRC2	ATP5PO
	SPOCK2	C17orf100	C16orf58	ATP5MF	BIRC5	ATP6AP1
	SYCE1L	C17orf75	C16orf72	ATP5MG	BLM	ATP6AP2
	SYNE1	C18orf32	C17orf98	ATP5PB	BLOC1S1	ATP6V0A2
	TAFA1	C19orf25	C19orf24	ATP5PD	BLVRA	ATP6V0B
	TAGLN2	C1orf158	C19orf53	ATP5PF	BMP7	ATP6V0D1
	TAZ	C1orf194	C1orf174	ATP5PO	BMPR1A	ATP6V1A
	TBR1	C1orf198	C1orf210	ATP6AP1	BMS1	ATP6V1B2
	TCF7	C1orf61	C1orf43	ATP6AP2	BNIP1	ATP6V1C1
	TCIM	C1QBP	C1orf52	ATP6V0B	BNIP2	ATP6V1D
	TCTEX1D4	C1QTNF1	C2orf69	ATP6V0C	BORA	ATP6V1E1
	TECRL	C20orf194	C3orf38	ATP6V0D1	BPGM	ATP6V1G1
	TMEM132E	C2orf72	C4orf3	ATP6V0E1	BRAT1	ATP6V1H
	TMPRSS7	C2orf88	C4orf47	ATP6V0E2	BRCA1	ATRAID
	TMSB10	C3orf70	C6	ATP6V1B2	BRCA2	ATXN10
	TNFRSF25	C5orf30	C6orf106	ATP6V1F	BRD4	ATXN7L3B
	TPST1	C5orf47	C6orf141	ATP6V1G1	BRD7	AUP1
	TPT1	C6orf118	CA12	ATRAID	BRD8	AURKAIP1
	TRIB1	C6orf89	CA2	ATRN	BRI3BP	AXL
	TRIM69	C6orf99	CA9	ATRX	BRIP1	B3GALNT1
	TRIO	C8orf37	CABP1	ATXN10	BRIX1	B3GALT6
	TTC21B	C9orf24	CACYBP	ATXN7L1	BTAF1	B3GAT3
	TTC39B	C9orf64	CALD1	AURKAIP1	BTBD10	B3GNT5
	TUBA1A	CA2	CALU	AVL9	BTBD17	B4GALT1
	TUBA3E	CA8	CAMK2B	AZGP1	BTF3L4	B4GALT3
	UBC	CAB39L	CAMK2N1	AZIN1	BTG3	B4GALT7
	UBD	CACHD1	CAMSAP1	B2M	BTNL8	BABAM1
	UGT2B4	CACNG1	CAP1	B3GAT3	BUB1	BABAM2
	VIL1	CACNG6	CAPN12	B4GALT2	BUB1B	BACE2
	VIM	CACNG7	CAPN15	B4GALT5	BUB3	BAG1
	VMP1	CADM2	CAPN2	BAALC	BUD13	BAG3
	VTN	CADPS2	CAPRIN2	BABAM1	BUD23	BAIAP2
	YAP1	CAHM	CARS	BACE1	BUD31	BAK1
	ZBTB22	CALCOCO1	CASS4	BAD	BZW1	BATF3
	ZFP36	CALM1	CAST	BAG4	C10orf88	BAZ1A
	ZFP42	CALM2	CAV1	BAG6	C11orf24	BCAP29
	ZNF784	CAMK2G	CAV2	BANF1	C11orf54	BCAP31
		CAMK4	CAVIN1	BAP1	C11orf86	BCAR1
		CAMKMT	CBWD1	BARD1	C12orf43	BCAS2
		CAPN11	CBWD2	BATF3	C12orf45	BCAT1
		CASC4	CBWD3	BAZ1B	C12orf57	BCCIP
		CASK	CBWD6	BBIP1	C12orf65	BCKDHA
		CASKIN1	CCDC107	BBS7	C12orf73	BCKDK
		CASKIN2	CCDC116	BBS9	C12orf75	BCL10
		CASTOR3	CCDC12	BBX	C14orf119	BCL2L1
		CBFA2T2	CCDC130	BCAP29	C15orf39	BCL2L13
		CBR1	CCDC174	BCAP31	C16orf45	BCL7B
		CBX5	CCDC58	BCAT1	C17orf53	BCS1L
		CBY3	CCDC59	BCL2L1	C17orf78	BET1
		CCDC103	CCDC68	BCL2L13	C18orf54	BFAR
		CCDC113	CCDC78	BCL6	C19orf48	BIN3
		CCDC144A	CCDC83	BCL7B	C19orf57	BLOC1S2
		CCDC144B	CCDC85A	BCL7C	C19orf73	BLOC1S6
		CCDC144CP	CCDC85B	BCS1L	C1orf112	BLZF1
		CCDC152	CCDC86	BECN1	C1orf21	BMP2
		CCDC163	CCDC9	BEST4	C1orf35	BMS1
		CCDC169-SOHLH2	CCDC93	BEX3	C1orf54	BOD1
		CCDC184	CCL13	BICD1	C1QBP	BOLA3
		CCDC190	CCL20	BICRAL	C1QTNF2	BOP1
		CCDC47	CCL22	BID	C1QTNF7	BORCS8
		CCDC57	CCL26	BLCAP	C1QTNF9	BPNT1
		CCDC65	CCL5	BLM	C21orf58	BRCC3
		CCDC74B	CCN3	BLOC1S1	C22orf15	BRD9
		CCDC85C	CCNG1	BLOC1S2	C2orf48	BRIX1
		CCNE2	CCNG2	BLOC1S4	C2orf69	BRK1
		CD101	CCNI	BLOC1S6	C2orf80	BRMS1
		CD200	CCNT1	BMPR2	C3orf14	BTBD1
		CD38	CCR1	BOLA3	C3orf70	BTBD10
		CD3G	CCT3	BORCS7	C4orf19	BTF3
		CD4	CCT4	BRD7	C4orf46	BTF3L4
		CD81	CCT6A	BRI3	C5orf30	BUB3
		CD9	CCT6P1	BRINP2	C5orf34	BUD23
		CDC14B	CCT6P3	BRIX1	C6orf163	BUD31
		CDC14C	CCT8	BRK1	C6orf48	BYSL
		CDC42EP4	CD14	BSCL2	C7orf50	BZW1
		CDCA7L	CD163	BSG	C8orf33	BZW2
		CDH1	CD163L1	BST2	C9orf40	C11orf24
		CDH10	CD164	BTBD1	C9orf85	C11orf49
		CDH20	CD2AP	BTBD2	CABLES2	C11orf58
		CDHR1	CD300LB	BTF3	CABP4	C11orf68
		CDIP1	CD33	BTG3	CACNB3	C12orf10
		CDK2AP1	CD3EAP	BUD23	CACNG4	C12orf29
		CDKN1B	CD53	BUD31	CACYBP	C12orf43
		CDO1	CD68	BVES	CALM3	C12orf45
		CDR1	CD8A	BZW1	CALU	C14orf119
		CDS2	CDAN1	BZW2	CAMK2N2	C16orf72
		CEACAM18	CDC37	C10orf67	CAMKK2	C16orf91
		CELA3A	CDC37L1	C11orf49	CAMSAP1	C18orf25
		CELF6	CDC42	C11orf58	CAND1	C19orf24
		CELSR2	CDHR3	C11orf68	CAND2	C19orf48
		CEP78	CDK13	C12orf57	CAPN7	C1D
		CERS1	CDK20	C14orf132	CAPRIN1	C1orf109
		CES1P1	CDK7	C16orf87	CAPZB	C1orf122
		CFAP126	CDKAL1	C18orf32	CARHSP1	C1orf174
		CFL1	CDKL3	C19orf12	CARS2	C1orf198
		CHADL	CDKN2D	C19orf24	CASC3	C1orf43
		CHCHD2	CDON	C19orf53	CASP2	C1QBP
		CHD6	CDRT1	C1orf122	CASP3	C1S
		CHD9	CDV3	C1orf226	CASP8AP2	C20orf27
		CHDH	CDYL2	C1orf43	CASQ1	C21orf62
		CHN1	CEACAM19	C1orf53	CBFB	C2orf69
		CHRDL1	CEACAM21	C1QBP	CBL	C2orf74
		CHRNB1	CEBPA	C1QL1	CBR3	C3orf14
		CHST1	CEBPB	C1QTNF3	CBR3-AS1	C5orf15
		CHST6	CEBPG	C1QTNF6	CBR4	C5orf22
		CHST9	CEBPZ	C1R	CBX1	C6orf141
		CIPC	CEL	C1S	CBX2	C6orf48
		CIRBP	CELSR1	C20orf27	CBX3	C6orf89
		CKB	CEP250	C21orf62	CBX5	C7orf50
		CLASP2	CEP76	C2CD2	CCAR1	C8orf33
		CLCN4	CEP89	C2orf68	CCDC12	C8orf59
		CLDN5	CERS5	C3	CCDC125	C9orf116
		CLDND1	CFAP161	C4orf3	CCDC126	C9orf78
		CLEC18A	CFAP36	C5orf15	CCDC134	CA12
		CLIP3	CFDP1	C5orf24	CCDC138	CA5BP1
		CLNS1A	CFL2	C6orf120	CCDC14	CA9
		CLU	CFLAR	C6orf15	CCDC144A	CAB39
		CLUH	CFP	C6orf203	CCDC144B	CAB39L
		CMA1	CGGBP1	C6orf47	CCDC15	CACNG5
		CMBL	CHAC1	C6orf62	CCDC150	CALM3
		CMTM2	CHAF1B	C6orf89	CCDC153	CALR
		CMTM4	CHCHD3	C7orf61	CCDC167	CALU
		CMTM5	CHD1L	C8orf33	CCDC173	CAMK1
		CNBP	CHD2	C8orf59	CCDC18	CAMK2D
		CNIH2	CHERP	C9orf16	CCDC189	CAMK2N1
		CNMD	CHGA	CA12	CCDC28A	CAMLG
		CNN3	CHMP1B	CA2	CCDC34	CANX
		CNNM2	CHORDC1	CA3	CCDC38	CAP1
		CNP	CHPF2	CAAP1	CCDC74A	CAPG
		CNPY4	CIART	CABIN1	CCDC82	CAPN2
		CNTD1	CIB1	CACNB2	CCDC84	CAPRIN1
		CNTFR	CITED2	CAD	CCDC86	CAPZA1
		CNTN1	CITED4	CADM1	CCDC87	CAPZA2
		COL11A1	CIZ1	CADM3	CCDC88A	CAPZB
		COL28A1	CKM	CALB2	CCDC89	CARD16
		COLCA1	CKMT2	CALCRL	CCM2	CARD8
		COLCA2	CKS2	CALM1	CCN6	CARS
		COPZ2	CLASRP	CALM2	CCNB1	CARS2
		CORIN	CLCF1	CALM3	CCNB2	CASP1
		COX11	CLCNKA	CALR	CCND1	CASP2
		COX4I1	CLDN14	CALU	CCND2	CASP3
		COX6A1	CLDN15	CAMK1	CCND3	CASP4
		CPE	CLDN4	CAMK1D	CCNE1	CASP7
		CPEB4	CLDN6	CAMK2D	CCNE2	CAST
		CPLANE1	CLDN9	CAMK2N1	CCNF	CAV1
		CPLX1	CLEC2B	CAMLG	CCNK	CAVIN1
		CPNE5	CLEC4A	CAMTA1	CCP110	CBFA2T3
		CR2	CLEC5A	CANT1	CCSAP	CBFB
		CRB1	CLIC1	CANX	CCT2	CBR3
		CRIP2	CLIC2	CAP1	CCT3	CBS
		CRIP3	CLIC6	CAP2	CCT4	CBWD1
		CRIPT	CLMP	CAPG	CCT5	CBWD2
		CRISPLD1	CLTA	CAPN1	CCT6A	CCDC112
		CRNDE	CMPK1	CAPN2	CCT7	CCDC137
		CRYL1	CNBP	CAPN5	CCT8	CCDC47
		CSMD1	CNGB1	CAPNS1	CCZ1	CCDC51
		CSPG5	CNGB3	CAPRIN1	CD180	CCDC85B
		CSRP1	CNN2	CAPZA1	CD209	CCDC86
		CST3	CNOT3	CAPZA2	CD320	CCM2
		CTDSPL	CNOT7	CAPZB	CD99	CCNC
		CTNND2	CNPPD1	CARD16	CDC123	CCND3
		CTSF	CNPY1	CARHSP1	CDC20	CCNQ
		CTSO	CNTD1	CARM1	CDC23	CCT2
		CXXC4	COL23A1	CARS	CDC25A	CCT3
		CXXC5	COL27A1	CASC4	CDC25B	CCT4
		CYFIP2	COL4A3BP	CASP1	CDC25C	CCT5
		CYP11A1	COL6A3	CASP2	CDC27	CCT6A
		CYP27A1	COL6A4P2	CASP4	CDC34	CCT7
		CYP2F1	COMMD2	CAST	CDC42BPA	CCT8
		CYP46A1	COPS4	CAV1	CDC45	CCZ1B
		CYP4F3	COPS8	CAVIN1	CDC5L	CD151
		DAAM2	CORO1C	CBFB	CDC6	CD163L1
		DACT3	COX17	CBR1	CDC7	CD164
		DAG1	COX20	CBWD2	CDC73	CD24
		DAGLA	COX7A2L	CBX3	CDCA2	CD274
		DAPK1	CPA4	CBX5	CDCA3	CD276
		DAZAP2	CPEB1	CCDC102B	CDCA4	CD2BP2
		DBI	CPED1	CCDC106	CDCA5	CD320
		DBX2	CRABP2	CCDC107	CDCA7	CD34
		DCAKD	CREB3	CCDC124	CDCA7L	CD3EAP
		DCLK2	CREB3L1	CCDC167	CDCA8	CD46
		DCUN1D1	CREB3L4	CCDC186	CDH2	CD47
		DCXR	CREBRF	CCDC25	CDH22	CD59
		DDAH1	CRHR2	CCDC28B	CDK1	CD63
		DDB1	CRIPAK	CCDC47	CDK14	CD68
		DDIT4	CRTAC1	CCDC6	CDK16	CD82
		DDIT4L	CRTC2	CCDC71L	CDK2	CD99L2
		DDR1	CRYGD	CCDC80	CDK2AP2	CDC123
		DDTL	CRYM-AS1	CCDC85B	CDK4	CDC23
		DDX58	CSDE1	CCDC88A	CDK5	CDC37
		DECR1	CSF1R	CCM2	CDK5R1	CDC37L1
		DEFB109B	CSNK1A1P1	CCN1	CDK5RAP2	CDC42
		DEGS2	CSNK1G2	CCNB3	CDK6	CDC42EP1
		DFFA	CSNK2A2	CCNC	CDKN1A	CDC42EP3
		DGCR5	CSTB	CCND2	CDKN2AIPNL	CDC42SE1
		DGCR6	CSTF2	CCND3	CDKN2C	CDC42SE2
		DGKB	CTAGE4	CCNH	CDKN2D	CDC73
		DGKG	CTAGE6	CCNI	CDKN3	CDH11
		DGLUCY	CTDNEP1	CCT2	CDRT4	CDH2
		DHRS4	CTNNBL1	CCT3	CDSN	CDK10
		DHRS4-AS1	CTRB2	CCT4	CDT1	CDK16
		DHRS4L1	CTSW	CCT6A	CDYL	CDK4
		DHRS4L2	CUL4A	CCT7	CEACAM1	CDK5
		DHRS7	CWC22	CCT8	CEBPG	CDK6
		DHRS7B	CWC25	CCZ1	CELA2A	CDK7
		DHX8	CWF19L2	CCZ1B	CELF2	CDKN2A
		DICER1-AS1	CXADRP2	CD109	CELSR3	CDKN2AIPNL
		DIPK1A	CXCL2	CD151	CENPA	CDKN2B
		DIPK1B	CXCL3	CD164	CENPC	CDS2
		DLEC1	CXCL8	CD276	CENPE	CDV3
		DLG2	CXCR4	CD320	CENPF	CEBPG
		DLG4	CXorf56	CD34	CENPH	CEBPZ
		DLL1	CYBB	CD44	CENPI	CEMIP2
		DLL3	CYLD	CD47	CENPJ	CENPT
		DMD	CYP19A1	CD58	CENPK	CEP19
		DMTN	CYP2S1	CD59	CENPL	CEP89
		DNAAF3	CYP3A4	CD63	CENPM	CERK
		DNER	CYSRT1	CD81	CENPN	CERS2
		DNM3	CYSTM1	CD83	CENPO	CERS5
		DNPH1	CYTH3	CD9	CENPP	CERS6
		DOCK4	DAPK3	CDC27	CENPQ	CES2
		DPP10	DARS	CDC34	CENPU	CETN2
		DPP6	DAXX	CDC37	CENPV	CFAP298
		DPY19L2P1	DBIL5P2	CDC40	CENPW	CFAP36
		DRD2	DCAF10	CDC42	CEP120	CFL2
		DSCR9	DCDC2	CDC42EP1	CEP131	CHCHD3
		DST	DDHD2	CDC42SE2	CEP135	CHCHD7
		DTX1	DDIT3	CDC7	CEP152	CHI3L1
		DTX4	DDIT4	CDCA7L	CEP170B	CHID1
		DYNC1LI2	DDX18	CDH11	CEP295	CHM
		DYNC2H1	DDX21	CDH2	CEP41	CHMP1A
		DYNLRB2	DDX31	CDH3	CEP55	CHMP2A
		E2F1	DDX39A	CDIPT	CEP57	CHMP4A
		EAF2	DDX41	CDK16	CEP57L1	CHMP5
		ECH1	DDX47	CDK2AP1	CEP76	CHMP7
		ECHDC2	DDX55	CDK2AP2	CEP78	CHPF
		EDNRB	DEDD2	CDK4	CEP83	CHST2
		EFCAB1	DENND3	CDK5	CEP85	CHST3
		EFCAB7	DGUOK	CDK6	CEP97	CHTF8
		EFHD1	DHPS	CDKN1A	CERKL	CHTOP
		EFS	DHX15	CDKN2B	CFAP20	CHURC1
		EGF	DIAPH2	CDKN2C	CFAP97	CIAO1
		EGFR	DIPK2A	CDS2	CFDP1	CIAPIN1
		EHD3	DIRC3	CDV3	CGGBP1	CIB1
		EIF2AK1	DKK1	CELSR2	CHAC2	CIDECP1
		ELMO1	DLK2	CEND1	CHAF1A	CISD1
		ELN	DLX1	CEP350	CHAF1B	CIZ1
		ELP5	DMBT1	CEP85L	CHCHD3	CKAP4
		EMID1	DMRT2	CERS1	CHCHD4	CKAP5
		EMILIN3	DNPEP	CERS2	CHD9	CLASP1
		ENDOG	DNTTIP2	CERS5	CHEK1	CLCC1
		ENDOU	DOCK6	CFAP221	CHEK2	CLCF1
		ENHO	DOK3	CFAP298	CHMP1A	CLDN12
		ENTPD2	DOT1L	CFAP300	CHST3	CLIC1
		EPB41L1	DPCD	CFAP36	CHTF18	CLIC4
		EPHA3	DPH2	CFAP410	CHTOP	CLINT1
		EPHA8	DPH3	CFI	CIAO1	CLIP1
		EPHB3	DPM1	CFL1	CIAO2A	CLNS1A
		EPHX2	DPP4	CHAF1A	CIAPIN1	CLPB
		EPHX4	DPY30	CHCHD1	CINP	CLPP
		EPN2	DRAM1	CHCHD2	CIP2A	CLPTM1L
		EPOR	DRAP1	CHCHD5	CIT	CLTA
		ERBB2	DRD2	CHD4	CIZ1	CLTB
		ERBB4	DTWD1	CHERP	CKAP2	CLTC
		ERH	DUOX2	CHI3L1	CKAP2L	CMAS
		ERI2	DUSP15	CHID1	CKAP5	CMC1
		ERI3	DUSP4	CHL1	CKB	CMC2
		ESX1	DUSP5	CHMP1A	CKLF	CMPK1
		ETFA	DVL1	CHMP1B	CKLF-CMTM1	CMTM6
		ETV1	DVL3	CHMP2A	CKMT1B	CMTR2
		ETV2	DYNLT3	CHMP4A	CKS1B	CNBP
		EVI2A	DYRK3	CHMP6	CKS2	CNDP2
		EVI5	DYSF	CHN1	CLCC1	CNIH1
		EXOC4	EAPP	CHODL	CLEC1A	CNIH3
		EXTL1	EBF1	CHPF	CLGN	CNIH4
		EZH1	EBLN3P	CHPT1	CLIC1	CNOT7
		EZR	ECE2	CHST10	CLINT1	CNOT8
		F11R	EDAR	CHST12	CLNS1A	CNPPD1
		F2R	EDAR	CHST6	CLPTM1	CNR1
		F2RL1	EDARADD	CHST7	CLPTM1L	COA4
		F3	EDEM1	CHTOP	CLSPN	COA6
		F7	EDNRA	CHURC1	CMC2	COG4
		F8	EDRF1	CIAO2B	CMC4	COG8
		FABP5	EEF1A1	CIB1	CMSS1	COL1A2
		FADS1	EEF1G	CISD1	CMTM6	COL8A1
		FADS2	EEF2	CITED1	CNIH2	COLGALT1
		FAHD2A	EFCAB3	CKAP4	CNNM3	COMMD1
		FAHD2B	EFL1	CKLF	CNOT10	COMMD10
		FAIM2	EGLN1	CLCN7	CNOT7	COMMD2
		FAM107A	EGLN3	CLDN12	CNOT8	COMMD3
		FAM120AOS	EHD1	CLDND1	CNOT9	COMMD5
		FAM120C	EHD2	CLEC11A	CNPY1	COMMD6
		FAM160A1	EHF	CLIC1	CNPY3	COMMD8
		FAM167A	EIF1	CLIC4	CNTLN	COMT
		FAM169A	EIF1B	CLIP1	CNTRL	COPA
		FAM171A1	EIF2A	CLIP3	COA1	COPB2
		FAM171A2	EIF2S1	CLPTM1	COCH	COPE
		FAM173A	EIF2S1	CLSTN1	COG1	COPG1
		FAM178B	EIF2S2	CLTA	COIL	COPRS
		FAM181B	EIF3B	CLTB	COL6A6	COPS2
		FAM182A	EIF3B	CLTC	COL9A1	COPS3
		FAM182B	EIF3D	CLU	COMMD2	COPS4
		FAM184A	EIF3D	CMAHP	COMMD4	COPS5
		FAM189A2	EIF3E	CMAS	COP1	COPS6
		FAM217B	EIF3E	CMC1	COPA	COPS7A
		FAM221B	EIF3F	CMC2	COPB1	COPS8
		FAM222A	EIF3F	CMPK1	COPG1	COPZ1
		FAM229B	EIF3G	CMTM3	COPRS	COQ10B
		FAM30A	EIF3G	CMTM6	COPS3	COQ5
		FAM66C	EIF3H	CMTR1	COPS5	COQ9
		FAM66E	EIF3H	CMYA5	COPS6	CORO1A
		FAM84B	EIF3L	CNBP	COPS7B	CORO1B
		FASN	EIF3M	CNDP2	COPS8	CORO1C
		FAT1	EIF3M	CNEP1R1	COX17	COTL1
		FAT3	EIF4B	CNN3	COX19	COX16
		FAXDC2	EIF4EBP1	CNOT10	COX5A	COX20
		FBXL16	EIF4H	CNOT2	COX7A2L	COX5A
		FBXL22	EIF5	CNOT7	COX8A	COX7A2L
		FBXL5	ELAVL3	CNP	CPNE2	COX7B
		FBXO2	ELF4	CNPY2	CPSF7	CPNE3
		FBXO36	ELL	CNR1	CPXM1	CPNE4
		FBXO40	ELL2	COA1	CRAT	CPSF3
		FCGRT	ELOC	COA4	CRCP	CPSF6
		FCHSD2	ELOF1	COA5	CREB1	CPTP
		FDXR	ELOVL7	COA6	CREB3	CREB3
		FEZ1	ELP2	COASY	CREB3L2	CREG2
		FGD4	EMC3	COBL	CREB5	CRELD2
		FGF1	EMC4	COG4	CRLS1	CRIM1
		FGF11	EMC9	COG8	CRNDE	CRISPLD2
		FGF7P3	EMD	COL1A2	CRY1	CRK
		FGFR2	EME1	COL5A2	CRYGS	CRKL
		FGFR3	EMG1	COL6A1	CS	CRLS1
		FHL1	EML2	COLGALT1	CSE1L	CRMP1
		FIBIN	EMP3	COLGALT2	CSMD2	CROT
		FIG4	EMX2	COMMD1	CSNK1A1	CRTAP
		FIS1	EMX2OS	COMMD10	CSNK2A2	CRYZ
		FLRT1	ENG	COMMD6	CSNK2B	CRYZL1
		FLRT2	ENO1	COMMD9	CSPG4	CS
		FMN2	ENO2	COMT	CSPP1	CSDE1
		FMNL2	ENPP5	COPB1	CSRP2	CSE1L
		FMO2	ENY2	COPB2	CSTF2	CSK
		FMO6P	EP300	COPE	CSTF3	CSMD2
		FNBP1	EPAS1	COPRS	CTBP1	CSNK1A1
		FNBP1L	EPG5	COPS5	CTCF	CSNK1E
		FNDC11	EPPK1	COPS6	CTDSPL2	CSNK2A1
		FOS	EPRS	COPS7A	CTPS1	CSNK2B
		FOXN3	ERC2	COPS7B	CTSC	CSTB
		FOXO1	EREG	COPS8	CTSV	CSTF1
		FOXO3	ERO1A	COPS9	CTU2	CTBP1
		FOXO3B	ERVV-1	COPZ1	CUEDC1	CTBS
		FOXO4	ESR2	COPZ2	CUEDC2	CTNNBL1
		FOXR1	ESRRA	COQ10B	CUL1	CTNND1
		FRAT1	ESYT2	COQ8A	CUL2	CTPS1
		FREM1	ESYT3	COQ8B	CUL9	CTR9
		FRMPD2	ETS1	COQ9	CUX1	CTSA
		FRY	ETS2	CORO2B	CUX2	CTSB
		FSTL4	EVC	COTL1	CX3CL1	CTSC
		FTCDNL1	EVC2	COX14	CXADR	CTSD
		FUT5	EXOC3L2	COX16	CXCL16	CTSL
		FUT8	EXOSC5	COX4I1	CYB5A	CTTN
		FUT9	EXOSC7	COX5A	CYB5B	CTTNBP2NL
		FXYD1	F10	COX5B	CYB5R3	CTU2
		FXYD3	F11	COX6A1	CYC1	CUL1
		FXYD6	F5	COX6B1	CYCS	CUL3
		FXYD7	FAF2	COX6C	CYFIP1	CUL4A
		FZD10-AS1	FAHD1	COX7A2L	CYP20A1	CUTA
		G6PC3	FAM106CP	COX7B	CYREN	CXADR
		GAB1	FAM110B	COX8A	CZIB	CXorf40B
		GABARAP	FAM110C	CPNE1	DAGLB	CXXC1
		GABARAPL2	FAM114A1	CPNE2	DAP	CYB561A3
		GABBR1	FAM129A	CPNE3	DAP3	CYB561D2
		GABRB1	FAM129B	CPSF4	DAXX	CYB5B
		GADD45B	FAM13A	CPT1C	DBF4	CYB5R1
		GALC	FAM157B	CRB2	DBF4B	CYB5R2
		GALK1	FAM160A2	CRCP	DBIL5P	CYB5R3
		GALNT3	FAM162A	CREB5	DBNDD2	CYC1
		GALT	FAM168B	CRELD1	DCAF1	CYCS
		GAMT	FAM177A1	CRELD2	DCAF10	CYFIP1
		GAS2L1	FAM180A	CREM	DCAF12	CYP51A1
		GAS2L2	FAM207A	CRIP2	DCAF15	CYREN
		GAS6	FAM210A	CRISPLD1	DCAF16	CYSTM1
		GASK1A	FAM214B	CRK	DCBLD2	CYTOR
		GASK1B	FAM219A	CRLS1	DCC	DAB2
		GATA4	FAM220A	CROT	DCK	DAP
		GATM	FAM50A	CRTAP	DCLRE1C	DAP3
		GC	FAM57A	CRTC3	DCP1A	DARS
		GCDH	FAM92A1P2	CRYL1	DCP2	DARS2
		GCSH	FANCD2OS	CRYZ	DCPS	DAXX
		GDA	FANCE	CRYZL1	DCST1	DBNDD1
		GDI1	FAS	CS	DCTN3	DBNL
		GFAP	FASN	CSDE1	DCTPP1	DCAF10
		GFOD1	FASTKD2	CSE1L	DCXR	DCAF13
		GHR	FAU	CSF1	DDB2	DCBLD1
		GIMAP2	FBL	CSNK1A1	DDIAS	DCBLD2
		GIT1	FBLIM1	CSNK2B	DDX1	DCTD
		GJA1	FBLL1	CSRNP1	DDX11	DCTN1
		GJA3	FBRS	CSRP1	DDX12P	DCTN2
		GJA5	FBRSL1	CSRP2	DDX19A	DCTN3
		GJB7	FBXO36	CST3	DDX19B	DCTN4
		GJC1	FCHO1	CSTB	DDX23	DCTN5
		GKAP1	FCHO2	CTBP1	DDX39A	DCTN6
		GLCCI1	FEM1C	CTDSP2	DDX46	DCTPP1
		GLDC	FER1L4	CTDSPL	DDX47	DCUN1D5
		GLIDR	FFAR4	CTNNB1	DDX53	DDOST
		GLUD1	FGF5	CTSA	DDX55	DDR2
		GLUD2	FGF7	CTSB	DDX59	DDRGK1
		GLYATL2	FGFR1	CTSD	DDX60L	DDX1
		GMPR	FGFR1OP2	CTTN	DECR1	DDX10
		GNPTG	FHL2	CTTNBP2	DEF8	DDX19A
		GOLGA7	FHOD1	CUL1	DEGS1	DDX20
		GOLGB1	FITM2	CUX1	DEK	DDX21
		GOLIM4	FKBP1A-SDCBP2	CWC15	DENND2A	DDX24
		GOLM1	FKBP4	CXADR	DENND5B	DDX27
		GPAT2	FLCN	CXCL14	DENND6A	DDX41
		GPATCH8	FLNC	CXorf40B	DENR	DDX47
		GPD1	FLRT3	CYB561D2	DEPDC1	DDX49
		GPHN	FLT1	CYB5A	DEPDC1B	DDX50
		GPM6A	FN1	CYB5B	DERA	DDX51
		GPM6B	FNDC1	CYB5R1	DERL1	DDX52
		GPR137B	FNIP1	CYB5R3	DERL2	DDX56
		GPR156	FOLR3	CYBRD1	DERL3	DEDD
		GPR162	FOSL1	CYC1	DESI2	DEF8
		GPR34	FOXD4L3	CYCS	DGCR6L	DEGS1
		GPR37	FOXP1	CYFIP1	DGKH	DELE1
		GPR37L1	FOXS1	CYHR1	DHCR24	DENR
		GPR65	FRMD5	CYP20A1	DHFR	DERL1
		GPR68	FRMD6	CYP27B1	DHPS	DERL2
		GPR75	FTH1	CYP51A1	DHRS13	DES
		GPRC5B	FTH1P3	CYREN	DHRS4	DGCR2
		GPSM2	FTL	CYTH2	DHRS4L2	DGCR6L
		GPT2	FUBP1	CYTL1	DHX15	DGKZ
		GRAMD1C	FURIN	CYTOR	DHX16	DGUOK
		GRAMD2A	FUT1	CZIB	DHX30	DHCR7
		GRAMD2B	FUT11	DACT1	DHX34	DHDDS
		GREB1	FUT3	DAD1	DHX8	DHODH
		GRHPR	FUT6	DAP	DIAPH1	DHPS
		GRIA2	FXR1	DAP3	DIAPH3	DHRS7
		GRIK1	GABRD	DAPK3	DIMT1	DHX40
		GRIK4	GAD1	DAZAP2	DIP2B	DHX9
		GRIN2C	GAL	DBI	DIRAS2	DIABLO
		GSDMD	GAL3ST1	DBN1	DIS3	DIMT1
		GSTA4	GALNTL6	DBNDD1	DKC1	DIS3L
		GSTM1	GALP	DBNL	DLAT	DKC1
		GSTM2	GALR2	DBX2	DLEU2	DKK3
		GSTM3	GAPDH	DCAF13	DLG1	DLAT
		GSTM5	GAR1	DCAF8	DLGAP3	DLD
		GSTP1	GARS	DCBLD1	DLGAP5	DLEU1
		GSTZ1	GAS5	DCBLD2	DLL1	DLGAP4
		GSX2	GBE1	DCHS1	DMTF1	DMAC1
		GTF2F2	GCC1	DCLK1	DMWD	DMAC2
		GTF2I	GCKR	DCTN1	DNMBP	DMAP1
		GUF1	GCLC	DCTN2	DNMT1	DNAAF5
		GUSBP9	GDF6	DCTN3	DNTTIP2	DNLZ
		GYPE	GDNF	DCTN4	DOCK1	DNM2
		H3F3A	GEMIN7	DCTN6	DOCK11	DNMT1
		H3F3B	GET4	DCTPP1	DONSON	DNPEP
		H3F3C	GFPT2	DDA1	DOT1L	DNTTIP1
		HAAO	GGN	DDAH1	DPAGT1	DNTTIP2
		HADH	GJB7	DDAH2	DPF1	DOHH
		HAPLN1	GLIPR1	DDB1	DPM1	DOK1
		HCG25	GMCL1	DDOST	DPM2	DOLPP1
		HDAC11	GNB1	DDR1	DRG1	DPAGT1
		HEG1	GNL3	DDRGK1	DROSHA	DPCD
		HELB	GNLY	DDT	DSCC1	DPF2
		HEPACAM	GNPDA1	DDX1	DSEL	DPF3
		HERC6	GNRH1	DDX24	DSN1	DPH2
		HES5	GOLGA3	DDX3X	DTD1	DPH5
		HES6	GOLGA4	DDX47	DTL	DPH7
		HESX1	GOLGA6A	DDX5	DTNB	DPM1
		HEXIM1	GOLT1B	DDX56	DTNBP1	DPM2
		HGFAC	GPAT3	DDX59	DTX2	DPP9
		HIF3A	GPBP1L1	DECR1	DTYMK	DPY19L4
		HIGD1A	GPER1	DEGS1	DUS1L	DPYD
		HIP1	GPI	DEK	DUSP12	DPYSL5
		HIP1R	GPN1	DENND1A	DUSP14	DRAXIN
		HIPK2	GPNMB	DENND2A	DUSP2	DRG1
		HIST1H2BL	GPR146	DENR	DUSP26	DRICH1
		HIST1H4C	GPR4	DEPDC4	DUT	DSTN
		HIST1H4K	GPRC5A	DERA	DVL2	DTD1
		HLA-E	GRB10	DERL2	DXO	DTX3L
		HLTF	GREM2	DESI2	DYNC1H1	DTYMK
		HMG20A	GRID2IP	DGCR6L	DYNC1I2	DUS3L
		HMGCS1	GRK3	DGUOK	DYNC1LI2	DUSP11
		HMGN2	GRK5	DHX29	DYNLRB1	DUSP18
		HMGN5	GRM3	DHX30	DYRK1A	DUSP3
		HMX1	GRM7	DHX36	E2F1	DYNC1I2
		HNMT	GRM8	DHX9	E2F2	DYNC1LI1
		HNRNPK	GRPEL1	DIABLO	E2F3	DYNC2LI1
		HOGA1	GRPEL2	DIO2	E2F4	DYNLT1
		HOPX	GSK3B	DIRAS3	E2F7	DYNLT3
		HORMAD1	GSTO1	DKK3	E2F8	E2F5
		HOXA1	GTF2E1	DLC1	EBF4	EAF1
		HOXA7	GTF2F1	DLD	EBP	EBAG9
		HOXB5	GTF3C3	DLGAP1	ECHS1	EBLN3P
		HPCAL4	GTPBP2	DLGAP4	ECI1	EBP
		HPR	GTPBP4	DMAC1	ECT2	EBPL
		HR	GTSF1L	DMAP1	EDC4	ECHDC1
		HRASLS	GUCY2C	DMD	EED	ECHS1
		HSBP1	GYS1	DNMT1	EEF1B2	ECI1
		HSD17B12	H2BFM	DNPH1	EEF1D	ECI2
		HSD17B14	HCCS	DNTTIP1	EFCAB11	ECSIT
		HSD17B4	HCG11	DNTTIP2	EFCAB2	EEA1
		HSD17B6	HCLS1	DOLK	EFCAB5	EEF1B2
		HSD17B7P2	HDAC9	DPF1	EFEMP2	EEF1D
		HSD17B8	HEATR9	DPF2	EFHD2	EEF1E1
		HSDL2	HERC2P4	DPF3	EFL1	EEF2
		HSP90AA1	HERPUD1	DPH6	EFS	EEF2KMT
		HSP90AA4P	HGS	DPM1	EGFR	EFEMP1
		HSPA1B	HIC2	DPM2	EHMT2	EFNB1
		HSPA1L	HIF1A-AS2	DPM3	EI24	EFNB2
		HSPA2	HILPDA	DPP3	EIF2AK1	EFTUD2
		HSPA8	HIST1H2AD	DPP7	EIF2B1	EGLN1
		HTRA1	HIST1H2BD	DPY19L1	EIF2B5	EHBP1
		HYDIN	HIST1H4D	DPY19L4	EIF2S1	EHD1
		ICA1L	HIVEP2	DPY30	EIF2S2	EHD2
		ID2	HIVEP3	DPYD	EIF2S3	EI24
		ID2B	HK2	DPYSL2	EIF3A	EIF1AD
		ID3	HLA-F-AS1	DPYSL5	EIF3D	EIF1AX
		IDH1	HMGA1	DR1	EIF3F	EIF2A
		IDH2	HMGA2	DRAP1	EIF3K	EIF2AK1
		IFI27L1	HMGB2	DROSHA	EIF4A3	EIF2B1
		IFI27L2	HMGN4	DSTN	EIF4EBP1	EIF2B2
		IFI35	HNRNPC	DSTYK	EIF4EBP2	EIF2B3
		IFI44L	HNRNPC	DTX3L	EIF4G2	EIF2B4
		IFIH1	HNRNPH3	DTYMK	EIF4G3	EIF2D
		IFIT2	HNRNPUL1	DUSP1	EIF5A	EIF2S1
		IFIT3	HOOK2	DUSP12	EIPR1	EIF2S2
		IGDCC3	HOXC4	DUSP3	ELAVL1	EIF2S3
		IGDCC4	HOXC5	DUT	ELAVL4	EIF3A
		IGFL4	HPRT1	DYNC1I2	ELK1	EIF3B
		IGFLR1	HRH2	DYNLL1	ELL3	EIF3D
		IGSF11	HS3ST3B1	DYNLRB1	ELMOD2	EIF3E
		IGSF21	HSD17B14	DYNLT1	ELMOD3	EIF3G
		IGSF3	HSF4	DYRK1A	ELOA	EIF3H
		IGSF5	HSP90AB1	E2F6	ELOVL2	EIF3I
		IL11RA	HSP90AB3P	EAF1	ELP5	EIF3J
		IL13	HSPA4	EAPP	EMC1	EIF3K
		IL17D	HSPA6	EBP	EMC6	EIF3L
		IL17RB	HSPA9	EBPL	EMC7	EIF3M
		IL17RD	HSPE1-MOB4	ECE1	EMC8	EIF4A3
		IL9	HSPH1	ECH1	EMC9	EIF4E
		INAVA	HUS1	ECHDC1	EME1	EIF4E2
		INCA1	HYMAI	ECHS1	EML4	EIF4EBP1
		INTS2	HYPK	ECI2	EMP2	EIF4G2
		IQCA1	IARS	EDEM2	ENO3	EIF4H
		IQCG	IBSP	EDF1	ENOSF1	EIF5A
		IQSEC1	ICAM1	EEA1	ENTPD3-AS1	EIF5B
		IQUB	ICAM5	EEF1AKNMT	ENY2	EIF6
		ITGA2B	IDH3B	EEF1B2	EP400	EIPR1
		ITGA6	IDS	EEF1D	EPM2A	ELK1
		ITGAE	IER3	EEF1E1	ERAL1	ELK3
		ITGB4	IFITM10	EEF1G	ERCC6L	ELL2
		ITGB8	IFRD1	EEF2	ERG28	ELMSAN1
		ITIH5	IGF2BP2-AS1	EEF2KMT	ERGIC3	ELOA
		ITM2C	IGFBP2	EFEMP2	ERI1	ELOC
		ITPK1	IGFBP3	EFHC1	ERI2	ELOF1
		ITPKB	IGFBP5	EFHD2	ERI3	ELOVL1
		IVD	IGHMBP2	EFNB1	ERICH6	ELOVL5
		JAKMIP1	IGKV5-2	EFTUD2	ERLIN1	ELOVL6
		JAKMIP2	IK	EHD2	ERMAP	ELP2
		JHY	IKBIP	EI24	ERP29	ELP3
		JMY	IL11	EID1	ERP44	EMC1
		KANSL1	IL16	EIF1AX	ESCO2	EMC3
		KAT2A	IL17A	EIF2A	ESPL1	EMC4
		KAT2B	IL18R1	EIF2AK1	ETV1	EMC6
		KAT7	IL1R2	EIF2AK2	ETV4	EMC7
		KBTBD11	IL1RL1	EIF2AK4	ETV5	EMC8
		KBTBD7	IL2RG	EIF2B1	EVC	EMG1
		KCNC4	IL31RA	EIF2B4	EWSR1	EML1
		KCND1	IL32	EIF2S2	EXO1	EML4
		KCND2	IL4I1	EIF2S3	EXOC6	ENDOD1
		KCNE1	IL4R	EIF3A	EXOSC10	ENO1
		KCNIP1	ILF2	EIF3B	EXOSC2	ENPP5
		KCNIP3	ILF3	EIF3G	EXOSC3	ENSA
		KCNJ10	ILF3	EIF3I	EXOSC8	ENTPD6
		KCNJ16	ILK	EIF3K	EXOSC9	ENTR1
		KCNN2	IMP4	EIF3M	EZH2	ENY2
		KCNN3	IMPDH1	EIF4E	FAAH	EPAS1
		KCTD1	INF2	EIF4E2	FAF1	EPDR1
		KHK	INPP5K	EIF4EBP2	FAF2	EPHB2
		KIAA1210	INSIG1	EIF4G1	FAM110A	EPRS
		KIAA1211	INSIG2	EIF4G2	FAM111A	EPS15
		KIAA1755	INSL3	EIF4H	FAM111B	ERCC1
		KIAA1958	INSYN2A	EIF6	FAM120B	ERCC3
		KIDINS220	INTS13	ELAC2	FAM122B	ERG28
		KIF21A	IPO4	ELAVL1	FAM133B	ERGIC1
		KIF21B	IQGAP1	ELMO2	FAM136A	ERGIC2
		KIF2A	IRAK1	ELMSAN1	FAM161A	ERGIC3
		KIF6	IRAK2	ELN	FAM168B	ERI1
		KIF9-AS1	IRF2BP1	ELOB	FAM192A	ERI3
		KLF12	IRF4	ELOC	FAM210A	ERP44
		KLF15	IRX2	ELOF1	FAM216A	ESRRA
		KLF9	ISG20	ELOVL1	FAM222B	ESS2
		KLHDC1	ISLR	ELOVL2	FAM225A	ESYT1
		KLHL25	IST1	ELOVL5	FAM41C	ESYT2
		KLHL31	ITCH	EMC10	FAM49B	ETF1
		KLHL32	ITGA3	EMC2	FAM53C	ETFA
		KLHL5	ITGA5	EMC3	FAM72A	ETFB
		KLRC2	ITGA8	EMC4	FAM72B	ETHE1
		KLRC3	ITGB1	EMC6	FAM72D	ETV5
		KRBA2	ITGB1BP1	EMC7	FAM76B	EVA1A
		KREMEN2	ITGB3	EMC8	FAM83D	EVA1B
		LAMTOR1	ITIH1	EMILIN1	FAN1	EVA1C
		LANCL1	ITM2C	EMP1	FANCA	EXD2
		LANCL2	ITPR1	EMP2	FANCB	EXOC2
		LAP3	ITPR3	EMP3	FANCC	EXOSC1
		LAPTM4A	IZUMO4	ENDOD1	FANCD2	EXOSC2
		LAPTM4B	JADE1	ENO1	FANCE	EXOSC3
		LDHB	JADE2	ENO2	FANCG	EXOSC4
		LDHC	JAML	ENOPH1	FANCI	EXOSC5
		LDLRAD4	JARID2	ENOX2	FANCL	EXOSC6
		LFNG	JMJD6	ENSA	FANCM	EXOSC8
		LGALS3BP	JOSD1	EPAS1	FARP1	EXT1
		LGI4	JRKL	EPC2	FARS2	EXT2
		LGR6	JSRP1	EPDR1	FARSB	EXTL3
		LHFPL4	KAAG1	EPHA5	FASTKD3	EYA3
		LHFPL6	KARS	EPHX1	FASTKD5	F12
		LHPP	KCMF1	EPN2	FAT3	F13A1
		LHX2	KCNA5	EPRS	FBH1	FAAP20
		LIFR	KCNB1	ERAP1	FBLN1	FADD
		LIMCH1	KCNJ4	ERCC1	FBLN7	FAF1
		LIN28B	KCNK13	ERCC2	FBXL5	FAF2
		LINC00173	KCNN4	ERCC3	FBXO21	FAM104A
		LINC00271	KCNQ1OT1	ERGIC3	FBXO28	FAM114A1
		LINC00320	KCNQ3	ERI1	FBXO33	FAM114A2
		LINC00461	KCNQ5	ERI3	FBXO4	FAM126A
		LINC00477	KCNRG	ERLEC1	FBXO43	FAM129A
		LINC00550	KCTD10	ERLIN2	FBXO5	FAM131B
		LINC00588	KCTD9	ERMAP	FDFT1	FAM162A
		LINC01235	KDELR2	ERP27	FDPS	FAM172A
		LINC01590	KDM2B	ERP29	FEM1A	FAM174A
		LINGO1	KDM4C	ERP44	FEN1	FAM177A1
		LITAF	KDM5A	ESD	FEV	FAM192A
		LIX1	KDM5C	ETF1	FEZ1	FAM204A
		LLGL1	KDM5D	ETFB	FEZF1	FAM207A
		LLGL2	KDM6B	ETV1	FGD5-AS1	FAM20B
		LMF1	KDM7A	ETV5	FGFR1OP	FAM210A
		LMO3	KHDC4	ETV6	FGL1	FAM210B
		LMOD1	KHDRBS3	EVA1B	FH	FAM216A
		LPAR4	KIAA0930	EWSR1	FIBP	FAM219B
		LPAR6	KIAA1143	EXOSC10	FIG4	FAM241A
		LPIN2	KIAA1191	EXOSC4	FIGNL1	FAM3A
		LPL	KIAA1522	EXTL3	FILIP1L	FAM3C
		LRCH2	KIF17	F3	FIZ1	FAM49B
		LRIG1	KIF19	FAAP20	FKBP1A	FAM50A
		LRMP	KIF2A	FABP7	FKBP3	FAM50B
		LRP1	KIFC3	FADD	FKBP5	FAM57A
		LRP4	KISS1R	FAF2	FLAD1	FAM78B
		LRRC17	KLC2	FAM102A	FLRT1	FAM86C1
		LRRC23	KLF11	FAM120A	FLVCR1	FAM86DP
		LRRC25	KLF4	FAM126A	FMNL3	FAM89B
		LRRC26	KLF5	FAM136A	FN3KRP	FANCF
		LRRC3	KLF7	FAM161B	FNIP2	FARSA
		LRRC34	KLHDC10	FAM168A	FOLH1	FARSB
		LRRC37BP1	KLHL18	FAM171B	FOPNL	FAS
		LRRC58	KLHL21	FAM181A	FOXD2-AS1	FASTK
		LRRC8A	KLHL30	FAM184B	FOXD4L6	FASTKD2
		LRRC8D	KLK14	FAM192A	FOXJ2	FBLIM1
		LRRN1	KMT2E-AS1	FAM204A	FOXK2	FBXL12
		LRRN3	KRT10	FAM20C	FOXM1	FBXO22
		LRRTM1	KRT19	FAM210B	FOXN4	FBXO28
		LRRTM2	KRT2	FAM219B	FOXO3B	FBXO3
		LRTM1	KRT25	FAM234A	FOXP1	FBXO30
		LSAMP	KRT82	FAM32A	FOXRED2	FBXO31
		LUC7L3	KRT86	FAM3C	FREM2	FBXO32
		LUZP2	KXD1	FAM50A	FRMD8	FBXO34
		LYNX1	KY	FAM76A	FSD1L	FBXW11
		LYRM7	LACTB	FAM84A	FUCA2	FBXW2
		LYRM9	LAMB1	FAM86DP	FUS	FBXW5
		LYVE1	LAMTOR3	FAM91A1	FUT9	FBXW9
		MAGED1	LAMTOR5	FAM92A	FUZ	FDPS
		MAGED2	LARP1	FANCL	FXN	FDX1
		MAGED4B	LARP1B	FAR1	FXYD6	FDX2
		MAGEF1	LARP4B	FARSA	FYTTD1	FEM1A
		MAGI1	LARP6	FARSB	FZR1	FEM1C
		MAGI2	LASP1	FAS	G2E3	FGFR1
		MANBA	LAT	FASTK	G3BP1	FH
		MAP2	LATS1	FBLN1	G3BP2	FHL2
		MAP3K5	LBH	FBLN5	G6PC3	FHL3
		MAP4	LCA5L	FBXL3	GABPB1	FIBP
		MAP6	LCORL	FBXL5	GABRA3	FIS1
		MAP6D1	LDHA	FBXO21	GADD45G	FKBP10
		MAP7	LEPR	FBXO6	GADD45GIP1	FKBP1A
		MAPK4	LGALS3	FBXO7	GALE	FKBP3
		MAPK8IP1	LGALS4	FBXO9	GALNT5	FKBP4
		MAPT	LHCGR	FBXW11	GAREM2	FKBP9
		MAPT-AS1	LHFPL2	FBXW5	GARS	FLNB
		MARCKS	LIAS	FCGR3A	GART	FLNC
		MARCKSL1	LIF	FCGRT	GAS1	FLOT1
		MASP1	LIN37	FCHSD2	GAS2L3	FLOT2
		MAST4	LINC00115	FDPS	GAS8-AS1	FNDC3A
		MATR3	LINC00294	FDX1	GATA2	FNDC3B
		MBNL2	LINC00312	FDX2	GATAD2A	FNTA
		MBP	LINC00313	FEZ1	GATAD2B	FNTB
		MCCC2	LINC00536	FGD1	GBF1	FOPNL
		MCF2L-AS1	LINC00547	FGD5-AS1	GCNA	FOSL1
		MCM3AP-AS1	LINC01011	FGF1	GCNT2	FOSL2
		MED11	LINC01061	FGFR1	GCSH	FOXK1
		MED12L	LINC01194	FHL1	GDAP1	FPGS
		MED13	LINC01587	FHL3	GDI1	FRMD8
		MED13L	LINC01599	FIBIN	GDI2	FTO
		MED24	LIPT1	FIBP	GEMIN2	FTSJ1
		MED29	LMAN1	FIS1	GEN1	FUBP1
		MEG3	LMTK2	FJX1	GGCT	FUCA2
		MEGF10	LONP1	FKBP14	GGH	FUNDC1
		MEGF11	LONP1	FKBP1A	GGNBP2	FUNDC2
		MEGF9	LOX	FKBP2	GINS1	FXN
		MEI1	LOXL2	FKBP3	GINS2	FZD3
		MERTK	LPCAT1	FKBP5	GINS3	G3BP1
		MEST	LRFN2	FKBP9	GINS4	G3BP2
		METRN	LRIF1	FLOT1	GJC1	G6PD
		METTL23	LRP12	FLOT2	GK	GABPB1
		METTL7A	LRRFIP1	FLVCR1	GLE1	GADD45A
		METTL9	LSG1	FMC1	GLI3	GADD45GIP1
		MFF	LSM3	FMOD	GLMN	GALNT1
		MFSD2B	LTB4R	FN3KRP	GLO1	GALNT11
		MGARP	LTK	FNDC3A	GLOD4	GALNT18
		MID1IP1	LTN1	FNDC3B	GLRX3	GALNT2
		MIF4GD	LY96	FNTA	GLT8D1	GAP43
		MINK1	LYAR	FOCAD	GMCL2	GARS
		MIPOL1	LYPD6B	FOSB	GMDS	GART
		MIR128-2	LYSMD1	FOXK1	GMNN	GAS5
		MIR181A2HG	LZTFL1	FOXRED2	GMPPB	GATB
		MIR26A1	LZTS2	FRMD3	GMPS	GATD3A
		MIR3650	M6PR	FSTL1	GNB1	GBA
		MIR3679	MAB21L1	FTO	GNB2	GBE1
		MIR423	MAFF	FUBP3	GNB4	GBP2
		MIR497HG	MAFG	FUCA2	GNB5	GCFC2
		MIR548AI	MAFK	FUNDC2	GNG10	GCLM
		MIR553	MAGIX	FXYD6	GNG4	GCNT1
		MIR568	MAL	FYN	GNL1	GDI2
		MIR611	MAML3	FYTTD1	GNL3	GEMIN2
		MIR622	MANBA	FZD3	GNPAT	GEMIN5
		MIR659	MAP1LC3B	FZD7	GNPDA2	GEMIN7
		MIR9-1	MAP1LC3B2	G3BP1	GOLPH3	GET4
		MIR99AHG	MAP1S	G3BP2	GOSR1	GFM1
		MITF	MAP2K1	G6PC3	GOSR2	GFOD2
		MLC1	MAP3K20	G6PD	GPAA1	GFPT2
		MLF1	MAP3K20-AS1	GAB1	GPAM	GGCT
		MMP28	MAP3K7	GABRQ	GPANK1	GGNBP2
		MMS22L	MAP4K5	GADD45A	GPAT4	GGPS1
		MN1	MAP4K5	GADD45GIP1	GPATCH1	GHITM
		MOB3B	MAP7D2	GAL3ST4	GPATCH4	GIPC1
		MOBP	MAPK8IP3	GALNT1	GPATCH8	GJB5
		MOCS2	MARCH1	GALNT10	GPBP1	GK
		MORN5	MARF1	GALNT11	GPD1L	GLB1
		MOXD1	MARK2	GALNT2	GPD2	GLIPR1
		MPDZ	MAX	GAMT	GPN3	GLIPR2
		MPL	MBD2	GAP43	GPR137	GLO1
		MPP5	MCEMP1	GAPDH	GPR153	GLRX
		MPPED2	MCHR1	GAPVD1	GPR180	GLRX2
		MRFAP1	MCTP2	GAS2L1	GPR19	GLRX3
		MRO	MCUB	GAS7	GPRIN1	GLRX5
		MRPS25	MDN1	GAS8	GPS1	GLS
		MRPS26	MED10	GASK1B	GPS2	GLS2
		MRPS28	MED15	GATD3A	GPSM2	GLT8D1
		MRVI1	MED19	GATM	GPX4	GLTP
		MSI2	MED7	GBA	GRB2	GMEB2
		MSTN	MEF2D	GBA2	GRHL2	GMFB
		MT1E	MEFV	GBF1	GRPEL1	GMPPA
		MT1IP	MET	GBP1	GRPR	GMPR2
		MT1M	METTL16	GBP2	GSKIP	GMPS
		MT3	METTL22	GCN1	GSPT1	GNB1
		MTAP	METTL26	GCSH	GSS	GNB5
		MTM1	METTL27	GDE1	GSTM3	GNG10
		MTMR9	MFN1	GDF11	GSTM4	GNG11
		MTRNR2L3	MFSD10	GDI1	GSTO1	GNG12
		MTRNR2L4	MGAM	GDI2	GTF2A2	GNG2
		MTSS1	MGAT1	GDPD2	GTF2H1	GNL1
		MTSS2	MGAT2	GEM	GTF2H2	GNL2
		MTTP	MICA	GFAP	GTF2H2B	GNL3
		MTUS1	MICAL2	GFM1	GTF2H3	GNPAT
		MVB12B	MICU1	GGCT	GTF3A	GNPDA1
		MX1	MIF-AS1	GGH	GTF3C5	GNS
		MXD4	MIR1-1HG-AS1	GGT5	GTF3C6	GOLGA5
		MYADML2	MIR103A2	GHITM	GTSE1	GOLGA7
		MYBBP1A	MIR128-1	GIPC1	GUCD1	GOLPH3
		MYBPC1	MIR1292	GIT2	GUCY1B1	GOLT1B
		MYCN	MIR1296	GLDC	GUSBP1	GORASP2
		MYCNOS	MIR1304	GLI3	H1FX	GOSR2
		MYH10	MIR1469	GLIPR2	H2AFV	GOT2
		MYH14	MIR17HG	GLMP	H2AFX	GPAA1
		MYL4	MIR191	GLO1	H2AFY	GPANK1
		MYO10	MIR21	GLOD4	H2AFZ	GPAT4
		MYO16	MIR210HG	GLRX2	HABP2	GPATCH4
		MYO5C	MIR25	GLS	HACD2	GPC1
		MYOM1	MIR27A	GLUL	HACE1	GPC4
		MYOM2	MIR301A	GMFB	HADH	GPI
		MYORG	MIR30D	GMPPA	HADHA	GPN1
		MYOZ1	MIR31HG	GNB1	HASPIN	GPN3
		MYOZ3	MIR3651	GNB2	HAT1	GPR27
		MZT2B	MIR3662	GNG10	HAUS1	GPRIN1
		N4BP2L1	MIR4284	GNG11	HAUS2	GPX1
		NATD1	MIR4292	GNG12	HAUS3	GRAMD1A
		NBEA	MIR4453HG	GNG2	HAUS4	GRB10
		NCALD	MIR4674	GNG4	HAUS5	GRHPR
		NCAM1	MIR4721	GNG5	HAUS6	GRPEL1
		NCAM2	MIR548AN	GNG7	HAUS7	GRPEL2
		NCAN	MIR548I1	GNL3	HAUS8	GRSF1
		NCKAP5	MIR574	GNPAT	HCFC1	GRWD1
		NCOR1	MIR589	GNS	HCG27	GSKIP
		NDFIP1	MIR612	GOLGA4	HCN2	GSN
		NDNF	MIR614	GOLGA7	HCN3	GSPT1
		NDP	MITD1	GOLM1	HDAC1	GSS
		NDRG2	MKNK2	GOLPH3	HDAC2	GSTO1
		NDRG3	MLIP	GON7	HDAC3	GTF2A2
		NDRG4	MLXIP	GOPC	HDGF	GTF2E2
		NDST1	MMADHC	GORAB	HDLBP	GTF2F1
		NDST3	MME	GOT2	HEATR1	GTF2H2
		NDUFA5	MMGT1	GPAA1	HECTD4	GTF2H5
		NDUFB1	MMP19	GPBP1	HEG1	GTF3A
		NDUFB5	MMP7	GPC5	HELLS	GTF3C2
		NDUFC2	MMS19	GPHN	HES1	GTF3C6
		NDUFC2-KCTD14	MOB1A	GPI	HES6	GTPBP4
		NDUFV1	MOGAT1	GPKOW	HESX1	GYG1
		NEB	MOGAT2	GPM6A	HGS	GYPA
		NEDD8	MORF4L2	GPM6B	HIGD1A	GYS1
		NEGR1	MPIG6B	GPN2	HINT1	H2AFY
		NEK1	MPLKIP	GPR152	HINT2	HADHA
		NEO1	MPP4	GPR37L1	HIP1	HADHB
		NEU4	MPP7	GPR89A	HIPK2	HARS
		NF1	MREG	GPRC5B	HIRIP3	HARS2
		NFIA	MRGBP	GPRIN1	HIST1H1A	HAT1
		NFIB	MROH1	GPS1	HIST1H1B	HAT1
		NGRN	MRPL1	GPX1	HIST1H1D	HAUS2
		NHSL1	MRPL13	GPX4	HIST1H1E	HAX1
		NINL	MRPL17	GRB2	HIST1H2AG	HBEGF
		NIPSNAP2	MRPL18	GRHPR	HIST1H2AH	HBS1L
		NKAIN3	MRPL21	GRIA1	HIST1H2AI	HCCS
		NKTR	MRPL39	GRIK3	HIST1H2AJ	HCFC1
		NLGN2	MRPL45P2	GRN	HIST1H2AL	HDAC2
		NLGN3	MRPL51	GRSF1	HIST1H2AM	HDAC3
		NLRP7	MRPS12	GRWD1	HIST1H2BF	HDDC2
		NME8	MRPS18C	GSAP	HIST1H2BJ	HDGF
		NNT	MRPS24	GSN	HIST1H2BM	HDHD2
		NOL4L	MRTFA	GSPT1	HIST1H2BO	HDHD5
		NOTCH1	MSANTD3	GSTA4	HIST1H3B	HDLBP
		NPAS3	MSH4	GSTK1	HIST1H3C	HEATR5B
		NPAS4	MSN	GSTO1	HIST1H3F	HEBP2
		NPDC1	MT1G	GSTP1	HIST1H3G	HERC2P3
		NPHS2	MT1L	GSX1	HIST1H3I	HERC4
		NPL	MT2A	GTF2A2	HIST1H4C	HEXB
		NR1H4	MTCL1	GTF2H5	HIST2H2AC	HEY1
		NR4A1	MTDH	GTF2I	HIST3H2BB	HGD
		NRARP	MTHFD1L	GTF3A	HJURP	HGS
		NRDE2	MTHFD2	GTF3C1	HLTF	HIBADH
		NREP	MTMR7	GTF3C6	HMG20B	HIF1A
		NRG2	MTRF1	GUK1	HMGA1P7	HIGD1A
		NRG3	MTUS2	GUSB	HMGB1	HIKESHI
		NRON	MUC17	GUSBP11	HMGB2	HINFP
		NRXN1	MXD1	H2AFV	HMGB3	HK1
		NRXN2	MXI1	H2AFY	HMGCR	HLA-C
		NSD3	MYADM	H2AFZ	HMGCS1	HLA-G
		NSG2	MYB	H3F3A	HMGN1	HLA-H
		NSMF	MYC	HABP4	HMGN2	HLX
		NT5DC1	MYCBP2	HACD3	HMGN3	HM13
		NT5M	MYH8	HADH	HMGN4	HMCES
		NTM	MYH9	HADHA	HMGN5	HMGA1
		NTRK2	MYL12A	HADHB	HMGXB4	HMGCL
		NUDT11	MYNN	HAGH	HMMR	HMGN4
		NUDT16P1	MYO1B	HARS	HNMT	HMOX1
		NUDT2	MYO1C	HAS2	HNRNPA0	HNRNPA0
		NUFIP2	MYO1E	HAS3	HNRNPA1	HNRNPAB
		NXPH3	MYO1E	HAT1	HNRNPA2B1	HNRNPC
		NXT2	MYO9B	HAUS1	HNRNPA3	HNRNPF
		OAS2	MYOF	HAX1	HNRNPAB	HNRNPK
		OGDH	MYOT	HDAC3	HNRNPC	HNRNPR
		OGFRL1	MYRF	HDDC2	HNRNPD	HNRNPU
		OLFM1	NABP1	HDGFL2	HNRNPF	HOMER1
		OLFM2	NCOA6	HDHD2	HNRNPH3	HOMER2
		OLFM4	NCS1	HDLBP	HNRNPK	HOMER3
		OLIG1	NDEL1	HEBP2	HNRNPL	HP1BP3
		OLIG2	NDRG1	HECTD3	HNRNPM	HPF1
		OLMALINC	NDUFA4L2	HEPACAM	HNRNPR	HPRT1
		OMG	NDUFAB1	HERPUD1	HNRNPU	HRAS
		OPALIN	NDUFAF2	HERPUD2	HNRNPUL1	HRH1
		OR6W1P	NEAT1	HEXA	HOXA5	HS2ST1
		OR7A5	NECAP1	HEXB	HOXB2	HSCB
		OR7C1	NECTIN3	HEY1	HOXC5	HSD17B10
		ORAI3	NECTIN4	HGF	HP1BP3	HSD3B7
		ORMDL3	NEK7	HIF1A	HPF1	HSF1
		OSBPL11	NELL2	HIF1AN	HPRT1	HSP90B1
		OXR1	NETO1	HIGD1A	HRAS	HSPA13
		P2RY1	NEU1	HIGD1B	HS2ST1	HSPA14
		PABPC5	NEUROD6	HIGD2A	HSD17B10	HSPA4
		PACRG	NFKB1	HINT1	HSD17B11	HSPA5
		PACSIN3	NFKBIA	HINT2	HSD17B7	HSPA9
		PAG1	NFKBID	HIPK1	HSDL2	HSPB11
		PAICS	NFKBIE	HIST1H1C	HSP90B1	HSPBP1
		PAIP2	NFKBIZ	HIST1H2AC	HSPA14	HSPD1
		PAIP2B	NFYA	HIVEP2	HSPA4L	HSPG2
		PAQR4	NGDN	HIVEP3	HSPA9	HTRA1
		PAQR6	NGFR	HK1	HSPB11	HUS1
		PAQR8	NGLY1	HLA-A	HSPB9	HUWE1
		PARD3B	NHLH1	HLA-B	HSPD1	HYAL2
		PARP1	NID2	HLA-C	HTATSF1	HYOU1
		PAX6	NIFK	HLA-DRB6	HYLS1	IAH1
		PBX1	NIPAL1	HLA-E	HYOU1	IARS
		PBXIP1	NIPAL4	HLA-H	IAH1	IARS2
		PCAT1	NKAIN1	HLCS	IARS	ICMT
		PCCB	NKAP	HM13	IARS2	IDH3B
		PCDH10	NKAPD1	HMBS	ICMT	IDH3G
		PCDH15	NLE1	HMGB1	IDH2	IDS
		PCDH18	NLRC4	HMGN1	IER2	IER3IP1
		PCDH7	NLRP6	HMGN2	IER3IP1	IFI16
		PCDH9	NLRP9	HMGN4	IFI27L1	IFNGR1
		PCDHA5	NMT1	HMOX2	IFNGR2	IFNGR2
		PCDHA6	NOA1	HNRNPAB	IFRD2	IFRD1
		PCDHB19P	NOL3	HNRNPC	IFT122	IFRD2
		PCDHB3	NOL7	HNRNPDL	IFT22	IFT22
		PCDHGA11	NOM1	HNRNPF	IFT27	IFT43
		PCDHGA2	NOP10	HNRNPH2	IFT52	IFT46
		PCDHGC3	NOP16	HNRNPK	IFT57	IFT52
		PCMTD2	NOP56	HNRNPLL	IFT74	IFT57
		PCSK1N	NOSTRIN	HNRNPM	IFT81	IGBP1
		PCYT1B	NOTCH3	HNRNPR	IGBP1	IGF2R
		PCYT2	NOTO	HNRNPU	IGFBP2	IGFBP2
		PDCD6	NOX4	HOMER3	IGHD2-15	IGFBP3
		PDCL	NPAS2	HOPX	IGSF21	IGKV1-17
		PDE3A	NPB	HOTAIRM1	IGSF6	IGKV6D-21
		PDE9A	NPC1	HOXC10	IKBIP	IKBKG
		PDGFA	NPC2	HOXD11	IL10RB	IL10RB
		PDGFRA	NPEPPS	HP	IL13RA2	IL13RA1
		PDHB	NPFFR2	HP1BP3	IL17RB	IL1R1
		PDK2	NPHP3	HRAS	ILF2	IL1RAP
		PDK4	NPHP3-AS1	HRH1	ILF3	IL32
		PDZD4	NPIPA1	HS2ST1	IMMP1L	IL33
		PDZRN3	NPIPB3	HS6ST1	IMPA2	IL6ST
		PEA15	NPM1	HSBP1	INCENP	ILF2
		PEBP1	NPPC	HSD11B1L	INF2	ILK
		PEG3	NPR3	HSD17B10	ING1	IMMT
		PELI2	NPRL3	HSD17B7	ING2	IMP4
		PEMT	NPTN	HSD3B7	ING3	IMPACT
		PEX11G	NR1H2	HSDL1	ING5	IMPAD1
		PEX12	NR1H4	HSF1	INIP	IMPDH1
		PFKFB2	NR2E3	HSP90AB1	INKA2	IMPDH2
		PFKM	NR2F6	HSP90B1	INO80E	INAFM1
		PFN2	NRAS	HSPA5	INPP5F	INIP
		PGAM2	NRN1	HSPB11	INSM1	INTS11
		PGM1	NRN1L	HSPB6	INSR	INTS14
		PGM5	NRP1	HSPB8	INTS1	INTS4
		PGM5-AS1	NRP2	HSPBP1	INTS4	INTS5
		PHACTR3	NSFP1	HSPD1	INTS7	INTS7
		PHB	NSMCE3	HSPE1	INVS	INTS8
		PHGDH	NSRP1	HTRA1	IP6K2	IP6K1
		PHKG1	NT5C1B	HTRA2	IPO11	IPO5
		PHLPP1	NT5C3A	HYAL2	IPO13	IQGAP1
		PHYHD1	NT5E	HYOU1	IPO5	IQGAP2
		PHYHIPL	NTN5	IAH1	IPO8	IRAK1
		PI16	NUDC	IARS	IPO9	IRAK2
		PI4KAP1	NUDC	ICAM1	IQCG	IRF2
		PIEZO2	NUDT16P1	ID4	IQGAP2	IRF3
		PIF1	NUDT21	IDH1	IQGAP3	ISCA2
		PIFO	NUP160	IDH2	ISG20L2	ISG20
		PIGS	NUP54	IDH3B	ISOC1	IST1
		PIGY	NUP58	IDH3G	ITFG1	ISY1
		PIK3C2A	NUP98	IDI1	ITGB1BP1	ITFG1
		PIK3IP1	NUPR1	IDS	ITGB3BP	ITFG2
		PIK3R1	NUS1	IER2	ITPK1-AS1	ITGA3
		PIK3R4	NXPE1	IER3IP1	ITPKA	ITGA5
		PIKFYVE	NXPH4	IFI16	ITPRID1	ITGB1
		PINK1	OAZ1	IFI27L2	ITPRIPL1	ITGB1BP1
		PIPOX	OBSCN	IFI35	IWS1	ITPA
		PITPNC1	OCA2	IFI44	JADE1	JAG1
		PJA1	ODC1	IFI44L	JAG1	JAGN1
		PKP1	ODR4	IFI6	JMJD8	JAK1
		PLCD3	OFD1	IFITM2	JPH3	JAM3
		PLEC	OGA	IFITM3	JPT1	JKAMP
		PLEKHB1	OGFR	IFNGR2	JPT2	JOSD2
		PLIN1	OLA1	IFRD1	JTB	JPH1
		PLIN5	ORMDL2	IFT22	KANK2	JPT1
		PLP1	OSBPL8	IFT43	KANSL2	JPX
		PLSCR4	OSCAR	IFT81	KARS	JTB
		PLTP	OSER1	IFT88	KAT2B	KARS
		PLXNB1	OSGIN1	IGBP1P1	KAT6A	KAT5
		PLXNB3	OSTM1	IGFBP2	KATNB1	KCMF1
		PLXNC1	OTUD5	IGFBP7	KATNBL1	KCNN4
		PMP2	OTULIN	IGKV6D-21	KBTBD2	KCTD3
		PMP22	OXSR1	IGSF1	KCNB2	KCTD5
		PMS2P2	P2RX7	IK	KCNE5	KCTD6
		PNCK	P4HA1	IL17RC	KCNK2	KDELR1
		PNISR	P4HA2	IL33	KCNK7	KDELR2
		PNMA8B	PABPC1	IL6ST	KCNQ1	KDSR
		PNPO	PABPC4	ILF2	KCNQ3	KEAP1
		POLR2G	PADI2	ILK	KCTD15	KHDRBS3
		POMGNT2	PAM	IMMT	KCTD18	KIAA1191
		PON2	PAPOLA	IMP3	KCTD6	KIF5B
		PON3	PAPPA-AS1	IMP4	KDELC2	KIF9
		POU6F2	PAPSS2	IMPACT	KDELR2	KIFAP3
		PPARGC1A	PAQR3	IMPAD1	KDM1A	KLC1
		PPAT	PARD6A	IMPDH2	KDSR	KLF3
		PPFIA2	PARP6	INAFM1	KHSRP	KLF6
		PPIF	PATL1	INPP5B	KIAA0408	KLHL12
		PPM1K	PCAT19	INTS10	KIAA0586	KLHL13
		PPP1R1A	PCAT6	INTS3	KIAA0895	KLHL4
		PPP1R1B	PCBP1	IPO13	KIAA1328	KLHL42
		PPP1R1C	PCK2	IPO5	KIAA1549	KLHL7
		PPP1R42	PCMTD1	IPO9	KIAA1586	KLHL9
		PPP2R2B	PCSK2	IQCK	KIAA1841	KPNB1
		PPP3CA	PCYT1A	IQGAP1	KIF11	KRBOX4
		PRCP	PDCD10	IQGAP2	KIF14	KRTCAP2
		PRDM11	PDCD6IP	IRAK1	KIF15	KTI12
		PRDM16	PDE1B	IRAK4	KIF18A	KXD1
		PRDM16-DT	PDGFC	IRF9	KIF18B	KYAT3
		PRDM7	PDHX	ISCU	KIF20A	L3HYPDH
		PRDX1	PDIA3P1	IST1	KIF20B	LAMB1
		PRDX2	PDK1	ITFG1	KIF22	LAMC1
		PRDX3	PDP1	ITFG2	KIF23	LAMP2
		PREX1	PDPK1	ITGA7	KIF24	LAMP3
		PRKACB	PDS5A	ITGAV	KIF2A	LAMTOR1
		PRKAG2	PDZD8	ITGB1	KIF2C	LARP1
		PRKCA	PDZD9	ITGB1BP1	KIF4A	LARP6
		PRKD1	PELO	ITGB8	KIF4B	LARS
		PRKX	PER2	ITM2B	KIF5B	LBH
		PRMT3	PERP	ITM2C	KIFC1	LCMT1
		PRODH	PFDN2	ITPA	KIN	LDHA
		PRPF8	PFDN4	ITPK1	KIRREL1	LEF1
		PRPSAP2	PFKFB4	ITPKB	KIRREL3	LENG1
		PRR18	PFKP	ITPKC	KLC1	LEPROT
		PRR27	PGAM1	ITPR2	KLHDC3	LEPROTL1
		PRR5	PGAM4	ITPRID2	KLHDC4	LETM1
		PRSS33	PGBD4	IVD	KLHDC8A	LGALS3
		PRSS42P	PGC	IVNS1ABP	KLHL23	LGI2
		PRSS50	PGF	JAGN1	KLHL9	LGMN
		PRSS54	PGK1	JAK1	KLRB1	LIMA1
		PRXL2A	PGRMC2	JAM2	KLRC3	LIMS1
		PRXL2B	PHAX	JAM3	KMT2A	LIN37
		PSAP	PHF1	JAZF1	KMT5A	LIN52
		PSAT1	PHF13	JMJD1C	KNL1	LIN7C
		PSD2	PICALM	JMJD8	KNOP1	LLPH
		PSIP1	PIEZO1	JPT1	KNSTRN	LMAN1
		PSMC5	PIGH	JPX	KNTC1	LMAN2
		PSME3	PIH1D1	JTB	KPNB1	LMCD1
		PSPH	PIM1	KANSL1-AS1	KRI1	LMO2
		PTCH2	PIM2	KAT5	KRTCAP2	LNPK
		PTGFRN	PIM3	KBTBD2	KXD1	LONP1
		PTGR2	PIP4K2A	KBTBD6	LAMC3	LOX
		PTPRD	PIP4P1	KCMF1	LARP4	LOXL1
		PTPRN2	PITX1	KCNF1	LBR	LOXL2
		PTPRT	PKD1	KCNH3	LCMT2	LOXL3
		PTPRZ1	PKD1P1	KCNIP1	LCOR	LPAR1
		PUF60	PKM	KCNMB4	LCORL	LPCAT1
		PXMP2	PKN1	KCTD10	LDAH	LRIF1
		PXMP4	PLAC8L1	KCTD12	LDHB	LRP10
		PYCR2	PLAUR	KCTD13	LENG1	LRPPRC
		PYGM	PLD4	KCTD3	LGALS2	LRR1
		PZP	PLD6	KCTD5	LHX2	LRRC41
		QKI	PLEKHD1	KDELR1	LIG1	LRRC42
		QPRT	PLEKHM1	KDELR2	LIMA1	LRRC47
		RAB11B	PLEKHM1P1	KEAP1	LIMD1	LRRC59
		RAB31	PLEKHM2	KIAA0754	LIMD2	LRRFIP1
		RAB36	PLEKHN1	KIAA1147	LIMS1	LSM1
		RAB4A	PLEKHO1	KIF1B	LIN52	LSM10
		RAB5C	PLIN2	KIF21A	LIN54	LSM12
		RAB6A	PLK2	KIF3B	LIN7C	LSM14A
		RAB7A	PLOD1	KIF3C	LIN9	LSM3
		RABAC1	PLOD2	KIF5B	LINC00167	LSM4
		RABL2B	PLOD3	KIF5C	LINC00471	LSM5
		RAC3	PLP2	KIFAP3	LINC01121	LTBP1
		RALGAPA1	PLPP6	KLC1	LINC02389	LTBP2
		RALGDS	PLXNA1	KLF10	LINGO1	LTV1
		RALGPS1	PMM2	KLF6	LITAF	LUZP1
		RAMP1	PNLDC1	KLF8	LLPH	LY6E
		RAMP2	PNO1	KLHDC3	LMAN1	LYN
		RAMP3	PNP	KLHDC8A	LMAN2	LYPD1
		RANBP3L	PNRC1	KLHL4	LMBR1	LYPLA1
		RAPGEF3	PNRC2	KRAS	LMF2	LYPLA2
		RARRES2	POLE3	KRCC1	LMNB1	LYPLAL1
		RASD1	POLH	KRTCAP2	LMNB2	LYRM4
		RASL10B	POLQ	KXD1	LMO7	LYRM7
		RASL12	POLR1C	KYAT3	LONP1	LZIC
		RASSF10	POLR2D	L3HYPDH	LOXL4	LZTS1
		RASSF4	POLR2H	LAGE3	LPCAT1	M6PR
		RAVER2	POLR3A	LAMA4	LPGAT1	MAD2L1BP
		RBL2	POM121	LAMA5	LRP11	MAD2L2
		RBM41	POM121C	LAMB2	LRP5	MAEA
		RBM43	POMZP3	LAMP2	LRP8	MAF1
		RCBTB2	POPDC3	LAMTOR1	LRR1	MAFG
		RCN2	POU4F2	LAMTOR2	LRRC26	MAGED2
		RDH11	PPDPF	LAMTOR4	LRRC37A4P	MAK16
		REEP6	PPDPFL	LAMTOR5	LRRC40	MALL
		RESF1	PPFIBP2	LAP3	LRRC45	MALSU1
		RETSAT	PPIL3	LAPTM4A	LRRC57	MAN1B1
		REV3L	PPME1	LAPTM4B	LRRC58	MAN2A1
		REX1BD	PPP1R11	LARGE1	LRRC59	MANBAL
		REXO1L1P	PPP1R13L	LARP1	LRRCC1	MAP1A
		RFC1	PPP1R14B	LBH	LRRD1	MAP1B
		RFTN2	PPP1R15A	LDHA	LRRN1	MAP1S
		RFX4	PPP1R15B	LDHB	LRTM2	MAP2K1
		RGCC	PPP1R16B	LDLR	LRWD1	MAP2K2
		RGMA	PPP1R18	LDLRAD3	LSG1	MAP2K3
		RGN	PPP1R2	LENEP	LSM12	MAP2K5
		RGS11	PPP1R27	LEO1	LSM2	MAP3K20
		RGS12	PPP1R2B	LEPROT	LSM3	MAP3K7
		RGS16	PPP1R3C	LEPROTL1	LSM4	MAP3K7CL
		RGS7	PPP1R7	LETMD1	LSM5	MAP7D3
		RGS9	PPP2R2A	LGALS1	LSM6	MAPK1
		RHBDD2	PPP2R3C	LGALS3	LSM7	MAPK13
		RHBDL3	PPP2R5B	LGALS3BP	LUC7L2	MAPK14
		RHEB	PPP3CC	LGALSL	LYPLA1	MAPK1IP1L
		RHOA	PPP3R1	LGMN	LYRM1	MAPK9
		RHOBTB3	PPRC1	LHFPL3	LYRM2	MAPKAP1
		RHPN1	PPTC7	LIFR	LYRM4	MAPKAPK5
		RIMKLB	PPY	LIMA1	MAB21L1	MAPKAPK5-AS1
		RIN2	PRAM1	LIMS1	MAD2L1	MAPRE1
		RIPOR2	PRAMEF2	LIN7C	MAD2L2	MARCH5
		RND1	PRDX4	LINC00260	MAGED1	MARCH7
		RND2	PRELID1	LINC00475	MAGEF1	MARS
		RNF103-CHMP3	PRKAB2	LINC01184	MAGI1	MAT2A
		RNF112	PRKCD	LIPA	MAGI2-AS3	MAT2B
		RNF13	PRKCH	LITAF	MAGOHB	MAU2
		RNF141	PRKCI	LIX1L	MAIP1	MBD1
		RNF150	PRKCSH	LMAN2	MAJIN	MBOAT7
		RNF167	PRPF19	LMBR1	MAML1	MBTPS2
		RNF170	PRPF38A	LMBRD1	MANF	MCAT
		RNF180	PRPF38B	LMO1	MAP3K7	MCC
		RNF213	PRPF39	LMO2	MAP6D1	MCFD2
		RNF5P1	PRPF4B	LONP2	MAP7D1	MCL1
		RNPC3	PRRG3	LPAR1	MAPK14	MCMBP
		ROBO2	PRSS12	LPCAT1	MAPK1IP1L	MCPH1
		ROBO3	PRSS37	LPCAT2	MAPK6	MCRIP1
		RPA1	PRSS53	LPCAT3	MAPKAPK5-AS1	MCRS1
		RPRM	PRXL2C	LPL	MAPRE1	MCUB
		RRH	PSD4	LRIG1	MAPRE2	MCUR1
		RSAD2	PSG6	LRP1	MARCH7	MDH1
		RSPH4A	PSMA6	LRP10	MARCKS	MDH2
		RTN3	PSMA7	LRP3	MARK1	MDK
		RUNDC3A	PSMB1	LRP5	MARS	MDM2
		RXRA	PSMD12	LRPPRC	MAST2	ME2
		RYR1	PSMD6	LRRC17	MASTL	ME3
		RYR3	PSMD8	LRRC27	MAZ	MEA1
		S100B	PTBP1	LRRC4B	MBD3	MEAF6
		S100G	PTBP3	LRRC8A	MBLAC2	MEAK7
		S1PR1	PTDSS1	LRRCC1	MBNL1	MECOM
		SALL2	PTGES3	LRRFIP1	MBOAT2	MED10
		SAMD9L	PTGS2	LRRN2	MBOAT4	MED16
		SAMHD1	PTH1R	LRRN3	MCAM	MED19
		SAR1B	PTK6	LSAMP	MCCC1	MED28
		SARM1	PTP4A1	LSM1	MCM10	MED8
		SASH1	PTP4A2	LSM10	MCM2	MEMO1
		SAT2	PTPDC1	LSM14A	MCM3	MESD
		SATB1	PTPN12	LSM2	MCM4	MET
		SBK1	PTPN18	LSM4	MCM5	METAP2
		SC5D	PTPN22	LSM5	MCM6	METTL18
		SCAPER	PTPRM	LSM6	MCM7	METTL2A
		SCD5	PTPRN	LSM7	MCM8	METTL2B
		SCG3	PTPRU	LTC4S	MCM9	METTL5
		SCGB1D2	PTRH2	LTF	MCTS2P	METTL9
		SCHIP1	PTX3	LUC7L2	MCUR1	MEX3C
		SCLT1	PURB	LY6E	MDC1	MFF
		SCN1A	PVT1	LYAR	MDH1	MFN2
		SCN2B	PXDNL	LYPD1	MDH2	MFSD10
		SCN3A	PXK	LYPLA1	MDK	MFSD14A
		SCPEP1	PYCARD	LYPLA2	MDM1	MFSD5
		SCRG1	PYGL	MACF1	MDM4	MGAT1
		SCRN2	QPCTL	MACROD1	MEA1	MGAT2
		SCUBE2	RAB10	MAD1L1	MED16	MGLL
		SDC3	RAB11FIP5	MAD2L2	MED27	MGST1
		SDCCAG8	RAB21	MAF	MED28	MICOS10
		SDK2	RAB27A	MAF1	MED30	MICOS13
		SEC62	RAB3GAP1	MAFF	MED6	MICU2
		SEMA3B	RAB8B	MAGED1	MED8	MIEF1
		SEMA4B	RABGEF1	MAGED2	MEIS1	MIER1
		SEMA5B	RABGGTB	MAGEF1	MELK	MIOS
		SEMA6A	RAC2	MAGI2-AS3	MELTF	MKRN2
		SEPHS2	RACK1	MAGT1	MELTF-AS1	MLEC
		SERF1A	RAD23A	MALSU1	MEOX2	MLLT11
		SERINC1	RAET1L	MAN1C1	MEPCE	MLLT3
		SERINC5	RAI1	MAN2A1	MESP1	MLX
		SERPINB13	RAI14	MAN2A2	MESTIT1	MMADHC
		SERPINE2	RALA	MANBAL	METAP1	MMGT1
		SERTAD4	RALGAPB	MANF	METAP2	MOB1A
		SESN1	RAN	MANSC1	METTL1	MOB3A
		SET	RAPGEF1	MAOB	METTL16	MOB4
		SEZ6	RAPGEFL1	MAP1A	METTL18	MORF4L2
		SFT2D1	RAPH1	MAP1B	METTL21A	MORN2
		SFTPB	RARA	MAP1LC3A	METTL21C	MOXD1
		SFTPD	RASA2	MAP1LC3B	METTL26	MPC2
		SGK3	RASAL2	MAP2	METTL3	MPDU1
		SH2D7	RASEF	MAP2K5	METTL4	MPG
		SH3BGRL	RASGEF1A	MAP3K13	METTL8	MPHOSPH6
		SH3GL3	RASGEF1B	MAP4	MFF	MPLKIP
		SHC4	RASSF3	MAPK1	MFSD14A	MPST
		SHD	RASSF5	MAPK10	MFSD14B	MPV17L2
		SHISA4	RASSF7	MAPK1IP1L	MFSD14C	MPZL1
		SHISA7	RAVER1	MAPK6	MFSD6	MREG
		SIRPA	RBAK	MAPK8IP1	MGAT5B	MRFAP1
		SIRT2	RBM15B	MAPRE1	MGME1	MRFAP1L1
		SKIDA1	RBM18	MAPRE2	MGMT	MRGBP
		SKP1	RBM33	MARCH3	MIA3	MRM2
		SKP2	RBM39	MARCKSL1	MICALL2	MRM3
		SLC11A1	RBM48	MAT2A	MICOS10	MRPL1
		SLC14A1	RBP7	MATN2	MICU2	MRPL10
		SLC15A2	RBPJ	MATR3	MIF4GD	MRPL13
		SLC16A11	RCE1	MAZ	MIGA1	MRPL14
		SLC16A9	RCL1	MBNL1	MIR181A2HG	MRPL15
		SLC18B1	RDH16	MBNL1-AS1	MIR4670	MRPL16
		SLC1A2	REL	MBOAT7	MIR491	MRPL17
		SLC1A3	RELA	MCC	MIR497HG	MRPL18
		SLC20A2	RELB	MCL1	MIRLET7BHG	MRPL19
		SLC22A17	RETN	MCM6	MIS12	MRPL2
		SLC22A3	RETREG1	MCRIP1	MIS18A	MRPL20
		SLC22A8	RETREG2	MCRS1	MIS18BP1	MRPL21
		SLC24A3	REXO1	MCTP1	MKI67	MRPL22
		SLC24A4	RFPL2	MCUB	MKRN2	MRPL23
		SLC25A11	RFX8	MDH1	MLEC	MRPL24
		SLC25A23	RGP1	MDH2	MLH1	MRPL28
		SLC25A42	RGPD1	MDK	MLLT11	MRPL3
		SLC25A48	RGS17	MEA1	MLX	MRPL30
		SLC25A5	RGS2	MEAF6	MMD	MRPL32
		SLC25A53	RGS4	MEAK7	MMGT1	MRPL35
		SLC30A10	RGS9	MECR	MMP16	MRPL36
		SLC35B4	RGS9BP	MED10	MMS22L	MRPL37
		SLC38A3	RIIAD1	MED14	MND1	MRPL39
		SLC39A11	RIOK1	MED27	MNS1	MRPL4
		SLC39A2	RIOK3	MEIS1	MOB3B	MRPL40
		SLC3A2	RIPOR1	MEOX2	MOB3C	MRPL41
		SLC43A2	RLF	MESD	MOCS2	MRPL42
		SLC44A2	RMC1	MEST	MORC2-AS1	MRPL43
		SLC46A1	RNASEH1P1	METAP2	MORF4L2	MRPL44
		SLC47A1	RND3	METRN	MPC2	MRPL46
		SLC47A2	RNF113A	METTL7B	MPHOSPH6	MRPL47
		SLC48A1	RNF114	METTL9	MPHOSPH9	MRPL48
		SLC49A4	RNF126	MFAP4	MPPED2	MRPL49
		SLC5A12	RNF126P1	MFF	MRE11	MRPL50
		SLC6A1	RNF149	MFGE8	MREG	MRPL51
		SLC6A11	RNF17	MFHAS1	MRGBP	MRPL52
		SLC6A9	RNF181	MFN2	MRM3	MRPL54
		SLC7A11	RNF183	MFSD1	MROH8	MRPL9
		SLC7A3	RNF185	MFSD10	MRPL12	MRPS10
		SLC7A7	RNF214	MFSD12	MRPL14	MRPS11
		SLC8A1	RNF217-AS1	MFSD14A	MRPL18	MRPS12
		SLC9B1	RNF24	MFSD14B	MRPL22	MRPS14
		SLCO1C1	RNF38	MFSD3	MRPL23	MRPS15
		SLCO5A1	RNF44	MGP	MRPL24	MRPS16
		SLIT1	RNF7	MGRN1	MRPL28	MRPS17
		SLITRK2	RNH1	MGST1	MRPL30	MRPS18A
		SLITRK2	RNMT	MGST3	MRPL33	MRPS18B
		SLITRK3	RNPS1	MICOS10	MRPL37	MRPS2
		SLITRK4	RPF2	MICOS13	MRPL38	MRPS21
		SMAD1	RPL10	MICU1	MRPL42	MRPS22
		SMAP1	RPL10	MIEN1	MRPL47	MRPS23
		SMARCE1	RPL11	MIER1	MRPL49	MRPS24
		SMIM20	RPL12	MIR637	MRPL51	MRPS25
		SMIM24	RPL13	MKKS	MRPL52	MRPS27
		SMO	RPL14	MKLN1	MRPL53	MRPS30
		SMOX	RPL15	MKRN1	MRPL9	MRPS33
		SMPD3	RPL15	MLC1	MRPS10	MRPS34
		SNHG20	RPL17	MLEC	MRPS11	MRPS35
		SNN	RPL17	MLF2	MRPS12	MRPS36
		SNORA22	RPL18	MLLT1	MRPS15	MRPS5
		SNORA71E	RPL18A	MLLT11	MRPS16	MRTFB
		SNORA78	RPL19	MLX	MRPS18A	MRTO4
		SNORD49A	RPL22	MMADHC	MRPS18C	MSH2
		SNORD49B	RPL23	MMP24	MRPS2	MSH6
		SNTA1	RPL23	MORF4L1	MRPS21	MSN
		SNTB1	RPL24	MORF4L2	MRPS22	MSRB3
		SNX18	RPL26	MORN2	MRPS26	MSTO1
		SNX3	RPL26L1	MOSPD3	MRPS6	MTCH1
		SNX5	RPL27A	MOXD1	MRPS7	MTCH2
		SORBS1	RPL29	MPC2	MRPS9	MTDH
		SORCS2	RPL30	MPG	MSANTD3	MTERF3
		SORCS3	RPL31	MPV17	MSH2	MTFR1L
		SORL1	RPL31P11	MPV17L2	MSH5	MTHFD1
		SOX13	RPL32	MR1	MSH5-SAPCD1	MTHFD2L
		SOX15	RPL34	MRAS	MSMP	MTHFS
		SOX2	RPL35	MRC2	MTA1	MTIF2
		SOX2-OT	RPL35A	MREG	MTA2	MTMR14
		SOX21	RPL36	MRFAP1	MTA3	MTMR2
		SOX3	RPL36A	MRM2	MTBP	MTREX
		SOX4	RPL36A-HNRNPH2	MRPL12	MTCH1	MTRR
		SOX5	RPL36AL	MRPL13	MTCH2	MTX1
		SOX6	RPL36AL	MRPL15	MTDH	MUL1
		SOX8	RPL37	MRPL18	MTERF4	MUS81
		SOX9	RPL37A	MRPL19	MTF2	MVB12A
		SPAG16	RPL39	MRPL20	MTFR2	MVP
		SPAG8	RPL4	MRPL21	MTG2	MYADM
		SPAG9	RPL41	MRPL23	MTHFD1	MYBPH
		SPARCL1	RPL5	MRPL28	MTHFD2	MYC
		SPATA20	RPL7	MRPL3	MTIF2	MYDGF
		SPATA22	RPL7A	MRPL32	MTOR	MYH9
		SPATA6	RPL7L1	MRPL37	MUL1	MYL12A
		SPCS2	RPL8	MRPL4	MXD3	MYL12B
		SPECC1	RPL9	MRPL41	MYBL1	MYL9
		SPEN	RPLP0	MRPL42P5	MYBL2	MYNN
		SPHK2	RPLP1	MRPL43	MYCBP2	MYOF
		SPI1	RPLP2	MRPL47	MYCN	MYOM2
		SPICE1	RPP21	MRPL51	MYEF2	MZT2A
		SPIN2A	RPPH1	MRPL54	MYH10	NABP2
		SPON1	RPS10	MRPL55	MYL3	NBPF15
		SPOP	RPS10-NUDT3	MRPL57	MYLK2	NCBP2
		SPTAN1	RPS11	MRPS11	MYO10	NCDN
		SPTBN1	RPS12	MRPS12	MZT1	NCKAP1
		SPX	RPS13	MRPS15	MZT2A	NCL
		SREBF1	RPS14	MRPS17	MZT2B	NCLN
		SRGAP1	RPS15	MRPS18C	NAA38	NCOA4
		SRGAP3	RPS15A	MRPS21	NABP2	NCSTN
		SRI	RPS15AP10	MRPS23	NAXE	NDEL1
		SRP9	RPS16	MRPS24	NBN	NDFIP2
		SRR	RPS18	MRPS26	NBPF11	NDUFA10
		SRRM4	RPS19	MRPS30	NCAPD2	NDUFA11
		SSPN	RPS2	MRPS34	NCAPD3	NDUFA12
		SSPO	RPS20	MRPS35	NCAPG	NDUFA6
		ST6GAL2	RPS21	MRTFB	NCAPG2	NDUFA7
		ST8SIA1	RPS23	MSANTD4	NCAPH	NDUFA8
		STAG3L4	RPS24	MSN	NCAPH2	NDUFA9
		STARD10	RPS25	MSRB1	NCBP1	NDUFAB1
		STARD4	RPS27	MSRB2	NCK1	NDUFAF1
		STARD7	RPS27L	MT2A	NCL	NDUFAF2
		STH	RPS28	MTCH1	NCLN	NDUFAF3
		STK17B	RPS29	MTCH2	NCOA5	NDUFAF4
		STK33	RPS3	MTDH	NDC1	NDUFAF7
		STMN1	RPS3A	MTFR1L	NDC80	NDUFAF8
		STMN4	RPS4X	MTG1	NDE1	NDUFB3
		STMP1	RPS5	MTHFD1	NDUFA10	NDUFB7
		STON2	RPS6	MTHFS	NDUFA6	NDUFB9
		STOX1	RPS6KA2	MTMR3	NDUFA9	NDUFS2
		STUB1	RPS6KA3	MTX1	NDUFAF6	NDUFS3
		STYK1	RPS7	MUC12	NDUFAF8	NDUFS4
		SUB1	RPS8	MUL1	NDUFB10	NDUFS6
		SULT1A1	RPSA	MVB12A	NDUFB11	NDUFS7
		SULT1C4	RPSAP52	MXRA8	NDUFB6	NDUFS8
		SUMF2	RPTOR	MYADM	NDUFB7	NDUFV1
		SUMO2	RRAD	MYC	NDUFB9	NDUFV2
		SUOX	RRAGB	MYD88	NDUFC2	NDUFV3
		SUPT4H1	RRAGC	MYDGF	NDUFS3	NECTIN2
		SWSAP1	RRAGD	MYL12A	NDUFS6	NEDD4L
		SYCP2	RRAS	MYL12B	NDUFS7	NEK6
		SYCP3	RRN3	MYL6	NDUFS8	NELFB
		SYPL2	RRN3P1	MYL6B	NDUFV1	NELFE
		SYT11	RRN3P2	MYO1E	NDUFV2	NENF
		SYT14	RRS1	MYO6	NECAP1	NEPRO
		SYT17	RSL1D1	MYOCD	NEDD1	NF2
		SYT9	RSL24D1	MYOF	NEDD4	NFIC
		TADA2A	RSL24D1	MZT2B	NEDD8	NFKBIZ
		TAFA5	RSRP1	NABP2	NEIL3	NFU1
		TALDO1	RTF2	NAXE	NEK2	NFX1
		TANC2	RTN2	NBAS	NELFCD	NFYA
		TANGO2	RUNX1	NBR1	NELFE	NHP2
		TAOK3	RXRG	NCDN	NELL2	NIFK
		TAS2R31	RYBP	NCEH1	NEMP1	NINJ1
		TASOR	S100A10	NCL	NEMP2	NIP7
		TBC1D28	S100A11	NCOA1	NET1	NIPA2
		TBCK	S100A2	NCS1	NETO2	NIT2
		TBX3	S100A6	NCSTN	NEURL1B	NKAPD1
		TCEA2	S100G	NDFIP1	NEUROD1	NLN
		TCF12	SACS	NDP	NFATC2IP	NMD3
		TCF4	SAP130	NDRG4	NFATC3	NME1-NME2
		TCF7L1	SAP30	NDST1	NFIB	NME2
		TCTN1	SARNP	NDUFA10	NFIC	NME3
		TEF	SARS	NDUFA11	NFU1	NMI
		TESK2	SARS2	NDUFA12	NFX1	NMT1
		TF	SART1	NDUFA13	NFYB	NNMT
		TFCP2L1	SBDSP1	NDUFA4	NFYC	NOB1
		TFDP2	SBF1P1	NDUFA5	NHLRC3	NOC2L
		TFRC	SBNO1	NDUFA6	NID1	NOC3L
		TG	SCAF4	NDUFA7	NID2	NOC4L
		TGFB2	SCD	NDUFA8	NIFK	NOD2
		TGIF2	SCIMP	NDUFA9	NIPA1	NOL10
		THAP5	SCN5A	NDUFAB1	NIPA2	NOL11
		THAP9	SCNN1B	NDUFAF6	NKAIN1	NOL3
		THBS4	SCNN1G	NDUFB10	NKAP	NOL7
		THRA	SCYL1	NDUFB11	NKD1	NOL8
		THTPA	SDC4	NDUFB2	NKIRAS2	NOLC1
		TIAF1	SDE2	NDUFB3	NKTR	NOMO1
		TICAM2	SDHAP2	NDUFB6	NLGN3	NONO
		TIMMDC1	SEC13	NDUFB7	NMD3	NOP10
		TIMP2	SEC23IP	NDUFB8	NME1	NOP16
		TJP1	SEC24A	NDUFB9	NME1-NME2	NOP2
		TJP2	SEC24C	NDUFC2	NME4	NOP56
		TLCD1	SEC31A	NDUFS2	NME7	NOP58
		TLR4	SEC61G	NDUFS3	NMRAL1	NOS2
		TM4SF19	SELENOS	NDUFS4	NMU	NOSIP
		TM7SF2	SENP5	NDUFS5	NNT	NPAS1
		TMBIM6	SERF2	NDUFS6	NOL11	NPAS2
		TMC6	SERINC3	NDUFS7	NOL12	NPM1
		TMED10	SERPINB8	NDUFS8	NOMO1	NPTN
		TMEM102	SERPINE1	NDUFV2	NONO	NPY2R
		TMEM125	SERTAD1	NECAB1	NOP56	NR1H2
		TMEM129	SERTAD2	NEDD9	NOP58	NR2F6
		TMEM132D	SERTAD3	NEIL2	NOSIP	NRAS
		TMEM144	SESN2	NEK6	NOSTRIN	NRBF2
		TMEM14A	SETD1A	NELL2	NOVA1	NRBP1
		TMEM14C	SF3B1	NENF	NPAT	NRDC
		TMEM170B	SF3B2	NES	NPEPL1	NRIP1
		TMEM176A	SF3B3	NETO2	NPLOC4	NRN1
		TMEM176B	SF3B3	NEU1	NPNT	NRP1
		TMEM18	SF3B5	NFAM1	NQO1	NRP2
		TMEM191B	SFR1	NFAT5	NR2C2AP	NSA2
		TMEM191C	SFXN3	NFATC2	NR2F1	NSD2
		TMEM192	SGMS2	NFE2L2	NR2F1-AS1	NSDHL
		TMEM218	SH2D5	NFIA	NRAS	NSFL1C
		TMEM229A	SH3BGRL3	NFIB	NRBF2	NSMCE1
		TMEM231	SH3BP4	NFIC	NRGN	NSUN2
		TMEM252	SH3BP5	NFKBIZ	NRM	NT5C3A
		TMEM255A	SH3D21	NFS1	NRSN2	NT5DC3
		TMEM42	SH3GLB1	NFU1	NSA2	NT5E
		TMEM59L	SH3RF1	NGRN	NSD2	NTMT1
		TMEM80	SH3RF3	NHLRC2	NSL1	NTPCR
		TMEM9B	SHMT2	NHP2	NSMCE1	NUB1
		TMPRSS5	SIAH2	NIM1K	NSMCE2	NUBP1
		TMPRSS6	SIGLEC5	NIPA2	NSMCE3	NUCB1
		TMX1	SIK1	NIPSNAP2	NSMCE4A	NUDC
		TNFRSF10C	SIKE1	NLGN1	NSRP1	NUDCD1
		TNFSF12	SINHCAF	NLGN3	NSUN6	NUDCD3
		TNFSF13B	SIRT1	NLGN4X	NT5C3A	NUDT21
		TNIK	SIT1	NMB	NT5C3B	NUDT22
		TNR	SIX5	NME1	NT5DC2	NUDT3
		TNRC6C	SLA2	NME2	NTAN1	NUDT5
		TNS3	SLC10A3	NME3	NUBP2	NUMB
		TOB1	SLC15A4	NME4	NUCB2	NUP107
		TOM1L2	SLC16A1	NME5	NUCKS1	NUP153
		TOP2B	SLC16A3	NME9	NUDC	NUP188
		TOX3	SLC18A1	NMI	NUDCD2	NUP205
		TP53BP2	SLC19A2	NMRAL1	NUDT1	NUP35
		TP53INP1	SLC1A4	NNMT	NUDT15	NUP37
		TPCN1	SLC1A5	NOC3L	NUDT21	NUP50
		TPH1	SLC22A13	NOD1	NUDT22	NUP62
		TPPP3	SLC22A14	NOL10	NUDT5	NUP93
		TPTE2P3	SLC22A23	NOL7	NUF2	NUPL2
		TRAF3IP2-AS1	SLC22A5	NOMO2	NUFIP1	NUTF2
		TRAF4	SLC23A3	NONO	NUMA1	NVL
		TRAPPC6A	SLC25A21	NOP58	NUP107	NXT1
		TREX1	SLC25A23	NOS1AP	NUP133	OAF
		TRIL	SLC25A26	NOSIP	NUP153	OAZ1
		TRIM2	SLC25A34	NOTCH1	NUP205	OCIAD1
		TRIM22	SLC25A36	NOTCH2	NUP210	OCIAD2
		TRIM5	SLC25A38	NPAS3	NUP37	OCRL
		TRIM65	SLC26A5	NPDC1	NUP43	ODC1
		TRIM9	SLC28A1	NPEPL1	NUP50	OGFOD1
		TRMT10B	SLC29A1	NPM1	NUP54	OLA1
		TRMT9B	SLC2A1	NPNT	NUP58	OPTN
		TRPS1	SLC2A3	NPRL2	NUP62	OR9A4
		TRPV2	SLC2A4RG	NQO1	NUP85	ORAI2
		TRPV3	SLC30A1	NR1H3	NUP88	ORC3
		TRPV4	SLC30A5	NR2E1	NUP93	ORC4
		TRPV6	SLC35E1	NR2F1-AS1	NUP98	ORC5
		TSC22D1	SLC35F4	NR2F2	NUPL2	ORMDL1
		TSC22D4	SLC35F5	NRAS	NUSAP1	ORMDL2
		TSEN54	SLC36A2	NRBP2	NUTF2	OS9
		TSHR	SLC38A1	NRCAM	NVL	OSBP
		TSPAN11	SLC38A2	NRP1	NXPH1	OSGEP
		TSPAN12	SLC38A5	NRSN2	NXT1	OSMR
		TSPAN3	SLC39A14	NSF	OAS3	OSTC
		TSPAN33	SLC39A9	NSFL1C	OAT	OSTM1
		TSPAN5	SLC43A3	NSL1	OAZ1	OTUB1
		TSPAN6	SLC51A	NSMCE1	ODC1	OTUD6B
		TSPAN7	SLC52A1	NSMF	ODF2	P3H1
		TST	SLC5A3	NT5DC3	OGG1	P3H2
		TTBK2	SLC5A5	NTMT1	OGN	P4HA1
		TTC19	SLC6A6	NTRK3	OIP5	P4HA2
		TTPA	SLC6A8	NUCB1	OIP5-AS1	P4HB
		TTYH1	SLC7A1	NUCKS1	OLA1	PA2G4
		TTYH2	SLC7A5	NUDC	OLAH	PABPC1P2
		TUB	SLC7A6OS	NUDCD2	OLIG1	PABPC4
		TUBA1A	SLC7A9	NUDCD3	OLIG2	PACRGL
		TUBB2B	SLC9A1	NUDT16L1	OMD	PAF1
		TUBB4A	SLCO4A1	NUDT19	OPA1	PAFAH1B2
		TUBG2	SLFN5	NUDT21	OR13G1	PAFAH2
		TXNDC16	SLITRK6	NUDT22	OR2B6	PAICS
		TXNIP	SLN	NUP188	OR52D1	PAIP1
		TXNRD3	SLTM	NUTF2	OR6W1P	PAK1IP1
		U2SURP	SLU7	OAS3	OR7E37P	PAM
		UBB	SMAD2	OAT	ORC1	PAM16
		UBQLN4	SMAD5	OAZ1	ORC3	PANK2
		UGT8	SMAD7	OAZ2	ORC5	PANX1
		ULK2	SMAGP	OCIAD2	ORC6	PAPOLA
		UNG	SMARCB1	OGDH	ORMDL1	PARD6B
		UPK3A	SMG1	OGFOD1	OSBPL11	PARK7
		USH1C	SMG7	OGG1	OSBPL6	PARP6
		USP2	SMIM15	OLFM2	OSGIN2	PARVA
		USP32P1	SMIM26	OLIG1	OSTC	PBDC1
		USP32P2	SMIM29	OMA1	OTUD3	PCBD1
		USP46	SMIM3	OR52B6	OTULINL	PCCB
		USP54	SMPDL3A	ORAI1	OXCT1	PCDH1
		USP6	SMS	ORAI2	P3H1	PCDHB7
		VAMP2	SNCG	OS9	PA2G4	PCDHGC3
		VASH1	SND1	OSBPL3	PABPN1	PCID2
		VCAN	SND1-IT1	OSBPL6	PACS1	PCMT1
		VCP	SNHG15	OSCP1	PAFAH1B2	PCNP
		VEZF1	SNHG4	OSMR	PAFAH1B3	PCNX4
		VIPR2	SNHG6	OST4	PAICS	PCSK1
		VSIG10	SNIP1	OTUB1	PAIP1	PDAP1
		VSIR	SNORA1	OTUD5	PAK2	PDCD10
		VWA1	SNORA15	OXTR	PAK6	PDCD11
		VWA2	SNORA28	P4HB	PALB2	PDCD1LG2
		VWA3A	SNORA29	P4HTM	PALM3	PDCD2
		VWA3B	SNORA2B	PA2G4	PANK4	PDCD5
		VXN	SNORA33	PAAF1	PAPSS1	PDCD6
		WASF3	SNORA3A	PAF1	PAQR4	PDCD6IP
		WASL	SNORA3B	PAFAH1B2	PARK7	PDCL3
		WBP1	SNORA60	PAFAH1B3	PARP1	PDE4D
		WBP2	SNORA64	PAIP1	PARP16	PDHA1
		WDR47	SNORA70G	PAK2	PARP2	PDHX
		WDR48	SNORA71B	PALLD	PARP6	PDIA3
		WDR49	SNORA72	PAM	PARPBP	PDIA4
		WDR59	SNORA74B	PAM16	PASK	PDIA6
		WDR6	SNORA79	PAMR1	PAX2	PDK3
		WDR64	SNORA84	PANK2	PAXX	PDLIM3
		WDR72	SNORA9	PAPSS1	PBK	PDLIM4
		WDR93	SNORD10	PARK7	PBRM1	PDLIM7
		WFDC2	SNORD11B	PARP1	PBX3	PDP1
		WFS1	SNORD12	PARP14	PC	PDPN
		WIPF2	SNORD19	PARP2	PCBD2	PDRG1
		WIPI2	SNORD33	PARP9	PCBP2	PDXK
		WNK2	SNORD34	PARVA	PCCB	PDZD11
		WNT7A	SNORD35A	PAXBP1	PCDHAC1	PDZD2
		WNT7B	SNORD35B	PBDC1	PCDHB11	PEF1
		WSB1	SNORD36B	PBX1	PCDHB15	PEG10
		WSCD1	SNORD36C	PBX4	PCDHB7	PELO
		WWOX	SNORD47	PBXIP1	PCDHGC4	PEPD
		XPR1	SNORD4B	PCBP1	PCLAF	PES1
		XYLT2	SNORD53	PCBP2	PCM1	PEX10
		YLPM1	SNORD54	PCBP4	PCMT1	PEX16
		YPEL3	SNORD56	PCDH17	PCNP	PEX19
		YWHAE	SNORD57	PCDHB16	PCP4L1	PEX2
		ZBTB20	SNORD58A	PCDHB2	PCSK5	PEX3
		ZBTB32	SNORD58C	PCDHB5	PCYT1B	PFDN1
		ZBTB33	SNORD59A	PCDHB8	PDAP1	PFDN2
		ZBTB47	SNORD59B	PCDHGC3	PDCD10	PFDN4
		ZC2HC1C	SNORD6	PCDHGC5	PDCD5	PFKL
		ZCCHC18	SNORD60	PCM1	PDCL3	PFKP
		ZDHHC21	SNORD63	PCMT1	PDF	PFN1
		ZDHHC22	SNORD73A	PCNP	PDHA1	PGAM1
		ZFAND5	SNORD74	PCOLCE	PDIA6	PGAM5
		ZFPM2	SNORD75	PCSK5	PDIK1L	PGAP2
		ZFY	SNORD76	PDAP1	PDK4	PGD
		ZFYVE21	SNORD77	PDCD1LG2	PDLIM1	PGGT1B
		ZHX1	SNORD80	PDCD2	PDPR	PGK1
		ZHX3	SNRPA1	PDCD5	PDS5A	PGLS
		ZMAT1	SNRPE	PDCD6	PDS5B	PGM2L1
		ZMAT3	SNX12	PDCL3	PDSS2	PGM3
		ZMYND8	SNX18	PDE4B	PELI1	PGRMC1
		ZNF204P	SNX25	PDE4D	PEX11G	PHAX
		ZNF232	SOAT1	PDE6D	PEX3	PHB
		ZNF275	SOCS4	PDHB	PFDN2	PHB2
		ZNF292	SOCS7	PDIA3	PFDN4	PHC2
		ZNF302	SOX9	PDIA4	PFN1	PHF20
		ZNF385A	SP140L	PDIA6	PGAM1	PHF23
		ZNF423	SPAG4	PDK3	PGAP1	PHF5A
		ZNF429	SPATA25	PDLIM2	PGBD1	PIAS3
		ZNF497	SPCS1	PDLIM3	PGBD5	PIAS4
		ZNF521	SPDYE1	PDLIM4	PGD	PIGH
		ZNF652	SPHK1	PDLIM5	PGM3	PIGP
		ZNF664	SPINDOC	PDPN	PGP	PIGS
		ZNF680	SPINT4	PDXK	PGRMC1	PIGT
		ZNF763	SPNS1	PDZD11	PHACTR4	PIGY
		ZNF792	SPNS2	PDZD2	PHB	PIN1
		ZNF815P	SPOCD1	PEA15	PHB2	PIN4
		ZNF835	SPOPL	PEBP1	PHF1	PINK1
		ZNF853	SPPL2B	PEF1	PHF10	PIP4K2A
		ZSCAN4	SPRED3	PEG10	PHF19	PIP4P1
		ZSCAN5B	SPRTN	PEPD	PHF20L1	PIP4P2
		ZSWIM7	SPRY1	PER2	PHF6	PITHD1
			SPSB1	PEX11A	PHGDH	PITPNB
			SPSB3	PEX16	PHIP	PITX1
			SPTY2D1	PEX19	PHPT1	PJA2
			SQLE	PEX2	PHTF2	PKIA
			SQSTM1	PFDN1	PHYHIPL	PKIB
			SRA1	PFDN5	PI4KB	PKM
			SRF	PFKFB3	PIAS2	PKN1
			SRL	PFKL	PID1	PLA2G15
			SRP72	PFKM	PIDD1	PLAGL2
			SRPRA	PFN1	PIGF	PLAUR
			SRRD	PFN2	PIGK	PLBD2
			SRRM5	PGAM1	PIGT	PLD3
			SRSF5	PGD	PIGX	PLEKHB2
			SRXN1	PGK1	PIK3C2B	PLEKHJ1
			SS18L1	PGLS	PIK3R3	PLGRKT
			SS18L2	PGM1	PIMREG	PLIN3
			SSBP1	PGM2L1	PIN1	PLK2
			SSR3	PGRMC1	PIN4	PLOD1
			SSRP1	PHB	PIR	PLOD3
			SSSCA1	PHB2	PITHD1	PLP2
			ST13	PHC2	PITPNM1	PLPBP
			STAB1	PHETA1	PITPNM3	PLPPR2
			STAB2	PHF11	PJA1	PLRG1
			STAR	PHF19	PKIA	PLS3
			STAR	PHF20L1	PKLR	PMEPA1
			STBD1	PHLDA1	PKMYT1	PML
			STC1	PHPT1	PKN3	PMPCA
			STC2	PHTF1	PKP4	PMS2P1
			STIP1	PHYH	PLAT	PMS2P5
			STK10	PHYHIPL	PLCB1	PMVK
			STKLD1	PI4KB	PLCE1	PNMA1
			STMND1	PIAS3	PLEKHB2	PNO1
			STRN3	PIGF	PLEKHH2	PNPLA2
			STX11	PIGT	PLEKHJ1	PNPT1
			STX3	PIGX	PLG	PNRC2
			STX4	PIGY	PLK1	POFUT1
			STX5	PIN1	PLK4	POGLUT1
			STXBP1	PINK1	PLLP	POLA2
			STXBP2	PIP4K2B	PLPPR1	POLB
			STXBP6	PIP4K2C	PLXNC1	POLD2
			SUGT1	PIP4P2	PMCH	POLD3
			SUGT1P3	PITPNB	PMF1	POLD4
			SUPV3L1	PJA2	PMF1-BGLAP	POLDIP2
			SURF2	PKD2	PMM1	POLE4
			SUSD1	PKIA	PMS2P1	POLK
			SYDE1	PKM	PNISR	POLR1C
			SYF2	PKN1	PNRC2	POLR1E
			SYNGR3	PLA2G16	POC1A	POLR2B
			SYT1	PLA2G5	POC1B	POLR2C
			SYT12	PLA2G6	POGZ	POLR2D
			SYT7	PLAT	POLA1	POLR2E
			SYTL2	PLAU	POLA2	POLR2F
			SZRD1	PLCB2	POLD1	POLR2K
			TACR2	PLD3	POLD2	POLR3A
			TAF1A	PLEKHA2	POLD3	POLR3C
			TAF1D	PLEKHF1	POLDIP2	POLR3D
			TAF4B	PLEKHG1	POLE	POLR3E
			TAF7	PLEKHJ1	POLE3	POLR3F
			TAF9	PLIN3	POLE4	POLR3K
			TAGLN	PLK3	POLG2	POMGNT1
			TAGLN2	PLOD1	POLK	POMP
			TARS	PLPP2	POLQ	POP4
			TAS1R1	PLPP3	POLR2D	POP5
			TAS2R30	PLPP5	POLR2E	POSTN
			TATDN1	PLPPR2	POLR2G	PPA1
			TAX1BP1	PLS3	POLR2H	PPA2
			TBC1D9B	PLSCR1	POLR2I	PPCDC
			TBL2	PLSCR4	POLR3C	PPFIBP1
			TBRG1	PLTP	POLR3K	PPHLN1
			TCAF2	PLXNB2	POM121C	PPIC
			TCEAL9	PLXND1	POMZP3	PPIH
			TCF20	PMP2	POP4	PPIL1
			TCF21	PMP22	POP5	PPIL3
			TCIM	PMPCA	POP7	PPIL4
			TCP1	PMS1	POU5F1	PPM1G
			TCTE3	PMS2P1	PPCDC	PPME1
			TEK	PMVK	PPEF1	PPP1CA
			TENT5B	PNKD	PPEF2	PPP1CB
			TERF2IP	PNMA1	PPHLN1	PPP1R11
			TEX15	PNMA2	PPIA	PPP1R14B
			TEX26-AS1	PNPLA2	PPIF	PPP1R15B
			TFB2M	PNPLA8	PPIG	PPP1R2
			TFR2	POC5	PPIH	PPP1R35
			TFRC	PODXL	PPIL1	PPP1R3F
			TGFB1I1	POFUT2	PPIL4	PPP1R7
			TGFBI	POGK	PPM1B	PPP1R9A
			TGFBR3	POLB	PPM1D	PPP2CA
			TGM2	POLD2	PPM1G	PPP2CB
			TGS1	POLD4	PPP1CA	PPP2R1A
			THAP2	POLDIP2	PPP1CC	PPP2R2A
			THAP6	POLE3	PPP1R14A	PPP2R2B
			THBD	POLE4	PPP1R3D	PPP2R3C
			THG1L	POLR1D	PPP1R7	PPP2R5D
			THOC6	POLR2A	PPP2CA	PPP2R5E
			TIGD3	POLR2E	PPP2R3C	PPP4C
			TIMM44	POLR2F	PPP2R5C	PPP4R3B
			TIMM8A	POLR2G	PPP2R5D	PPP5C
			TIMM9	POLR2I	PPP2R5E	PPP6C
			TIMP1	POLR2J	PPP4C	PPT1
			TIPRL	POLR2J4	PPP4R2	PQBP1
			TIRAP	POLR2L	PPP5C	PRDM4
			TJP3	POLR3H	PRADC1	PRDX3
			TLCD2	POM121	PRC1	PRDX4
			TLE3	POMGNT1	PRCC	PRDX6
			TLN1	POMP	PRDM5	PRELID1
			TM4SF1	PON2	PRDX6	PRELID3B
			TM4SF18	POP5	PRELID1	PREPL
			TMBIM1	POP7	PRELID3B	PRICKLE3
			TMC5	POR	PRIM1	PRKAB1
			TMC8	POTEE	PRIM2	PRKAG1
			TMED10P1	POTEF	PRIMPOL	PRKAR1A
			TMED5	POU6F1	PRKAA2	PRKCI
			TMED9	PPA1	PRKACA	PRKCSH
			TMEM11	PPHLN1	PRKACB	PRKDC
			TMEM120B	PPIA	PRKCSH	PRMT1
			TMEM121B	PPIB	PRKDC	PRMT2
			TMEM126A	PPIC	PRMT1	PRMT5
			TMEM131L	PPIE	PRPF31	PRMT6
			TMEM132C	PPIL1	PRPF38A	PRNP
			TMEM156	PPIP5K2	PRPF39	PROS1
			TMEM158	PPM1B	PRPF40A	PRPF4
			TMEM184A	PPM1G	PRPF4B	PRPF40A
			TMEM200A	PPME1	PRPF6	PRR13
			TMEM214	PPP1CA	PRPF8	PRR7
			TMEM268	PPP1CB	PRPS2	PRRC1
			TMEM38B	PPP1CC	PRPSAP1	PRRX1
			TMEM41A	PPP1R11	PRR11	PRSS23
			TMEM45A	PPP1R14B	PRR14L	PRUNE2
			TMEM60	PPP1R15A	PRR29	PSAP
			TMEM74B	PPP1R1C	PRRC2A	PSENEN
			TMEM86B	PPP2CA	PRUNE1	PSMA1
			TMEM92	PPP2CB	PSAT1	PSMA2
			TMF1	PPP2R1A	PSIP1	PSMA3
			TMOD3	PPP2R2B	PSMA2	PSMA4
			TMSB10	PPP2R5A	PSMA4	PSMA5
			TNFAIP3	PPP2R5D	PSMA5	PSMA6
			TNFAIP6	PPP4C	PSMA6	PSMA7
			TNFRSF10D	PPP6C	PSMA7	PSMB1
			TNFRSF12A	PPT1	PSMB1	PSMB10
			TNFRSF1B	PQLC1	PSMB3	PSMB2
			TNIP1	PRADC1	PSMB5	PSMB3
			TNNI3K	PRAF2	PSMB6	PSMB5
			TNNT1	PRCP	PSMB7	PSMB6
			TNPO1	PRDM13	PSMC1	PSMB7
			TOB2P1	PRDX1	PSMC2	PSMB8
			TOLLIP	PRDX2	PSMC3	PSMB9
			TOMM20	PRDX3	PSMC3IP	PSMC1
			TOMM5	PRDX4	PSMC4	PSMC2
			TOMM6	PRDX5	PSMC5	PSMC3
			TOP1P2	PRDX6	PSMC6	PSMC4
			TOPORS	PREB	PSMD1	PSMC5
			TP63	PRELID1	PSMD11	PSMC6
			TPD52	PREX1	PSMD12	PSMD1
			TPD52L2	PRKAA1	PSMD13	PSMD10
			TPI1	PRKACA	PSMD14	PSMD11
			TPI1P2	PRKAR1A	PSMD2	PSMD12
			TPM1	PRKAR1B	PSMD4	PSMD13
			TPM2	PRKAR2B	PSMD6	PSMD14
			TPM3	PRKCA	PSMD7	PSMD2
			TPM4	PRKDC	PSMD8	PSMD3
			TPST2	PRKG1	PSME1	PSMD4
			TPT1	PRKRA	PSME2	PSMD5
			TRA2A	PRMT1	PSMF1	PSMD6
			TRA2A	PRMT2	PSMG1	PSMD7
			TRABD2A	PRMT3	PSMG2	PSMD8
			TRAF3IP1	PRNP	PSMG3	PSME1
			TRAF6	PROS1	PSMG4	PSME2
			TRAPPC5	PROSER1	PSPC1	PSME3
			TREM1	PRPS2	PSPH	PSMF1
			TREML3P	PRPSAP1	PTBP1	PSMG1
			TREML4	PRPSAP2	PTDSS1	PSMG2
			TRGV9	PRR13	PTGES3	PSMG3
			TRH	PRRC2B	PTGR1	PSPC1
			TRIB1	PRRX1	PTGS1	PTBP1
			TRIB3	PRSS23	PTMS	PTCD1
			TRIM16	PRTFDC1	PTN	PTEN
			TRIM16L	PRUNE2	PTP4A2	PTGES2
			TRIM29	PRXL2A	PTPA	PTGR1
			TRIM38	PSAP	PTPN1	PTK2
			TRIM4	PSEN2	PTPN11	PTP4A1
			TRIM52	PSENEN	PTPN14	PTP4A2
			TRIM55	PSIP1	PTPN3	PTPA
			TRIM56	PSKH1	PTPRJ	PTPRE
			TRIO	PSMA1	PTTG1	PTPRR
			TRIP12	PSMA2	PTTG3P	PTRH1
			TRIR	PSMA3	PURG	PTRH2
			TRMT112	PSMA4	PUSL1	PTS
			TRPC1	PSMA5	PWRN2	PTX3
			TRPM1	PSMA7	PXDNL	PUDP
			TRPM5	PSMB1	PXMP2	PUM3
			TRPM7	PSMB10	PXMP4	PUS3
			TSACC	PSMB2	PYCR1	PUSL1
			TSC1	PSMB3	QSER1	PVR
			TSIX	PSMB4	RAB15	PWP1
			TSLP	PSMB5	RAB21	PXK
			TSPYL2	PSMB6	RAB22A	PYCR3
			TTC1	PSMB7	RAB23	PYGL
			TTC27	PSMB8	RAB33B	PYGO2
			TTLL12	PSMB9	RAB3B	QRICH1
			TTR	PSMC1	RAB3IP	QSOX1
			TUBA1C	PSMC2	RAB5C	R3HDM4
			TUBB	PSMC3	RAB5IF	RAB10
			TUBB1	PSMC4	RAB8A	RAB11A
			TUBB2A	PSMC5	RABEP1	RAB14
			TUBB4B	PSMC6	RABGGTB	RAB18
			TUBE1	PSMD1	RACGAP1	RAB1A
			TUFT1	PSMD11	RAD1	RAB1B
			TULP2	PSMD12	RAD18	RAB21
			TUSC2	PSMD13	RAD21	RAB22A
			TUT7	PSMD14	RAD23A	RAB24
			TWIST1	PSMD2	RAD51	RAB2A
			TWISTNB	PSMD4	RAD51AP1	RAB38
			TXLNG	PSMD7	RAD51C	RAB3B
			TXN	PSMD8	RAD51D	RAB3GAP2
			TXNL1	PSMD9	RAD54L	RAB40AL
			TYW1	PSME2	RADIL	RAB5A
			TYW5	PSME3	RAE1	RAB5IF
			U2AF1	PSME4	RAF1	RAB8A
			UAP1	PSMG2	RALA	RABEPK
			UAP1L1	PSMG3	RALY	RABIF
			UBA52	PSMG3-AS1	RAMAC	RABL3
			UBA6	PSRC1	RAN	RACK1
			UBAP2	PTBP1	RANBP1	RAD1
			UBE2B	PTCD3	RANBP6	RAD23A
			UBE2D3	PTCH1	RANGAP1	RAD50
			UBE2E2	PTDSS2	RAP1B	RAE1
			UBE2I	PTGES2	RAP1GAP	RAET1K
			UBE2K	PTGES3	RAPGEF6	RAI1
			UBE2R2	PTGFRN	RARS	RAI14
			UBN1	PTHLH	RASIP1	RALA
			UBQLN1	PTK2B	RASSF1	RALB
			UBXN6	PTMS	RASSF2	RALY
			UBXN7	PTN	RAVER1	RAN
			UCHL1	PTP4A1	RB1	RANBP1
			UCKL1-AS1	PTP4A2	RBBP4	RAP1A
			UCN	PTPA	RBBP5	RAP1B
			UCP1	PTPMT1	RBBP7	RAP1GDS1
			UFM1	PTPN11	RBBP8	RAP2C
			UGCG	PTPN9	RBL1	RAPH1
[truncated: 933 more rows]

## Sheet: GO Cluster 1
Cluster 1 - Gene ontology results
GO term - Biological Process	Count	%	PValue	Genes	List Total	Pop Hits	Pop Total	Fold Enrichment	Bonferroni	Benjamini	FDR
GO:0060968~regulation of gene silencing	5	2.92398	2.70365e-07	HIST1H3J, HIST1H3A, HIST1H3D, HIST1H3H, HIST1H3I	93	11	16792	82.0723	0.000135984	1.35993e-05	0.000389664
GO:2001056~positive regulation of cysteine-type endopeptidase activity	2	1.16959	0.0270987	MEFV, BBC3	93	5	16792	72.2237	0.999999	0.535924	32.6959
GO:0032200~telomere organization	8	4.67836	9.54223e-11	HIST1H3J, HIST1H4A, HIST1H4B, HIST1H3A, HIST1H4E, HIST1H3D, HIST1H3H, HIST1H3I	93	27	16792	53.499	4.79974e-08	1.59991e-08	1.37528e-07
GO:0006335~DNA replication-dependent nucleosome assembly	8	4.67836	3.53735e-10	HIST1H3J, HIST1H4A, HIST1H4B, HIST1H3A, HIST1H4E, HIST1H3D, HIST1H3H, HIST1H3I	93	32	16792	45.1398	1.77929e-07	3.55857e-08	5.09822e-07
GO:0000183~chromatin silencing at rDNA	9	5.26316	2.01749e-11	HIST1H3J, HIST1H4A, HIST1H4B, HIST1H3A, HIST1H4E, HIST1H3D, HIST1H3H, HIST1H3I, HIST2H3D	93	37	16792	43.9198	1.0148e-08	1.0148e-08	2.90771e-08
GO:0051290~protein heterotetramerization	8	4.67836	2.7122e-09	HIST1H3J, HIST1H4A, HIST1H4B, HIST1H3A, HIST1H4E, HIST1H3D, HIST1H3H, HIST1H3I	93	42	16792	34.3922	1.36424e-06	1.94891e-07	3.90897e-06
GO:0045814~negative regulation of gene expression, epigenetic	9	5.26316	2.64753e-10	HIST1H3J, HIST1H4A, HIST1H4B, HIST1H3A, HIST1H4E, HIST1H3D, HIST1H3H, HIST1H3I, HIST2H3D	93	50	16792	32.5006	1.33171e-07	3.32926e-08	3.81575e-07
GO:0045653~negative regulation of megakaryocyte differentiation	3	1.75439	0.00429083	HIST1H4A, HIST1H4B, HIST1H4E	93	18	16792	30.0932	0.885012	0.153275	6.00934
GO:0045815~positive regulation of gene expression, epigenetic	9	5.26316	1.58048e-09	HIST1H3J, HIST1H4A, HIST1H4B, HIST1H3A, HIST1H4E, HIST1H3D, HIST1H3H, HIST1H3I, HIST2H3D	93	62	16792	26.2102	7.94982e-07	1.32497e-07	2.27787e-06
GO:0016233~telomere capping	3	1.75439	0.00697034	HIST1H4A, HIST1H4B, HIST1H4E	93	23	16792	23.5512	0.970352	0.22222	9.58969
GO:0006336~DNA replication-independent nucleosome assembly	3	1.75439	0.0088592	HIST1H4A, HIST1H4B, HIST1H4E	93	26	16792	20.8337	0.988622	0.257997	12.0369
GO:0006334~nucleosome assembly	12	7.01754	4.69413e-11	HIST1H3J, HIST1H2BB, HIST1H2BN, HIST1H4A, HIST1H1B, HIST1H4B, HIST1H3A, HIST1H4E, HIST1H3D, HIST1H3H, HIST1H3I, HIST2H3D	93	119	16792	18.2076	2.36115e-08	1.18057e-08	6.76543e-08
GO:0006342~chromatin silencing	4	2.33918	0.00191202	HIST1H2AE, HIST1H2AK, HIST1H2AM, HIST1H2AL	93	45	16792	16.0497	0.618126	0.0837949	2.72064
GO:0006352~DNA-templated transcription, initiation	3	1.75439	0.0165762	HIST1H4A, HIST1H4B, HIST1H4E	93	36	16792	15.0466	0.999777	0.40873	21.4086
GO:0031047~gene silencing by RNA	9	5.26316	1.65898e-07	HIST1H3J, HIST1H4A, HIST1H4B, HIST1H3A, HIST1H4E, HIST1H3D, HIST1H3H, HIST1H3I, HIST2H3D	93	111	16792	14.6399	8.34431e-05	1.04308e-05	0.0002391
GO:0044267~cellular protein metabolic process	9	5.26316	2.66418e-07	HIST1H3J, HIST1H4A, HIST1H4B, HIST1H3A, HIST1H4E, HIST1H3D, HIST1H3H, HIST1H3I, HIST2H3D	93	118	16792	13.7715	0.000133999	1.48897e-05	0.000383975
GO:0034080~CENP-A containing nucleosome assembly	3	1.75439	0.0231801	HIST1H4A, HIST1H4B, HIST1H4E	93	43	16792	12.5971	0.999992	0.500393	28.6817
GO:1904837~beta-catenin-TCF complex assembly	3	1.75439	0.0231801	HIST1H4A, HIST1H4B, HIST1H4E	93	43	16792	12.5971	0.999992	0.500393	28.6817
GO:0006303~double-strand break repair via nonhomologous end joining	3	1.75439	0.0467397	HIST1H4A, HIST1H4B, HIST1H4E	93	63	16792	8.59805	1	0.699967	49.8368
GO:0070588~calcium ion transmembrane transport	4	2.33918	0.0276229	ATP2B3, MCOLN3, CATSPER2, PKD2L1	93	119	16792	6.06921	0.999999	0.523635	33.2167
GO:0007596~blood coagulation	6	3.50877	0.00341015	HIST1H3J, HIST1H3A, HIST1H3D, HIST1H3H, HIST1H3I, HIST2H3D	93	184	16792	5.8878	0.820618	0.133407	4.80405

## Sheet: GO Cluster 2
Cluster 2 - Gene ontology results
GO term - Biological Process	Count	%	PValue	Genes	List Total	Pop Hits	Pop Total	Fold Enrichment	Bonferroni	Benjamini	FDR
GO:1902667~regulation of axon guidance	2	0.854701	0.0213245	FEZF2, TBR1	181	2	16792	92.7735	1	0.655954	29.3929
GO:0042309~homoiothermy	2	0.854701	0.0213245	MC3R, DBH	181	2	16792	92.7735	1	0.655954	29.3929
GO:0032673~regulation of interleukin-4 production	2	0.854701	0.0421968	HLA-DRB5, LGALS9	181	4	16792	46.3867	1	0.81864	50.1485
GO:0006032~chitin catabolic process	3	1.28205	0.00231628	CHIA, CHI3L1, CHI3L2	181	7	16792	39.7601	0.936386	0.221548	3.67507
GO:0000028~ribosomal small subunit assembly	5	2.13675	4.36415e-05	RPS27, RPS28, RPS19, RPS14, RPS15	181	19	16792	24.4141	0.0505261	0.00645995	0.0704423
GO:0009607~response to biotic stimulus	3	1.28205	0.00955426	IFITM2, IFITM3, CCL18	181	14	16792	19.88	0.999989	0.509738	14.3593
GO:0030490~maturation of SSU-rRNA	3	1.28205	0.00955426	RPS28, RPS19, RPS14	181	14	16792	19.88	0.999989	0.509738	14.3593
GO:0042274~ribosomal small subunit biogenesis	3	1.28205	0.0124234	RPS28, RPS19, RPS15	181	16	16792	17.395	1	0.561802	18.2783
GO:0021542~dentate gyrus development	3	1.28205	0.0139816	FEZF2, BTG2, MDK	181	17	16792	16.3718	1	0.585377	20.3355
GO:0006414~translational elongation	3	1.28205	0.0156195	EEF1A1, RPLP1, RPLP2	181	18	16792	15.4622	1	0.589588	22.4456
GO:0034341~response to interferon-gamma	4	1.7094	0.00207722	CIITA, IFITM2, IFITM3, UBD	181	24	16792	15.4622	0.915441	0.218883	3.30173
GO:0071480~cellular response to gamma radiation	3	1.28205	0.0209938	EGR1, CRYAB, YAP1	181	21	16792	13.2534	1	0.682009	29.0066
GO:0055072~iron ion homeostasis	4	1.7094	0.00397517	SLC25A37, FTL, SOD2, B2M	181	30	16792	12.3698	0.99119	0.325866	6.22883
GO:0006614~SRP-dependent cotranslational protein targeting to membrane	12	5.12821	5.04559e-09	RPS25, RPL30, RPS27, RPS28, RPS19, RPL41, RPS14, RPL34, RPS15, RPLP1, RPLP2, RPS21	181	94	16792	11.8434	5.99414e-06	5.99414e-06	8.14684e-06
GO:0034612~response to tumor necrosis factor	3	1.28205	0.0291668	MAP4K3, CHI3L1, UBD	181	25	16792	11.1328	1	0.75503	37.9943
GO:0019083~viral transcription	12	5.12821	3.24616e-08	RPS25, RPL30, RPS27, RPS28, RPS19, RPL41, RPS14, RPL34, RPS15, RPLP1, RPLP2, RPS21	181	112	16792	9.94002	3.85636e-05	1.9282e-05	5.2414e-05
GO:0048008~platelet-derived growth factor receptor signaling pathway	3	1.28205	0.0383913	CSRNP1, ARID5B, PDGFRB	181	29	16792	9.59726	1	0.82138	46.8523
GO:0000184~nuclear-transcribed mRNA catabolic process, nonsense-mediated decay	12	5.12821	6.11224e-08	RPS25, RPL30, RPS27, RPS28, RPS19, RPL41, RPS14, RPL34, RPS15, RPLP1, RPLP2, RPS21	181	119	16792	9.35531	7.26107e-05	2.42042e-05	9.86909e-05
GO:0030449~regulation of complement activation	3	1.28205	0.0408496	CFB, VTN, CFI	181	30	16792	9.27735	1	0.829596	49.0042
GO:0060325~face morphogenesis	3	1.28205	0.0408496	DKK1, CSRNP1, ARID5B	181	30	16792	9.27735	1	0.829596	49.0042
GO:0060333~interferon-gamma-mediated signaling pathway	7	2.99145	0.000112218	CIITA, CD44, HLA-DRB5, HLA-B, GBP2, HLA-DRA, B2M	181	71	16792	9.14668	0.124817	0.0147044	0.181038
GO:0048147~negative regulation of fibroblast proliferation	3	1.28205	0.0433656	PMAIP1, FTH1, SOD2	181	31	16792	8.97808	1	0.817133	51.1218
GO:0071364~cellular response to epidermal growth factor stimulus	3	1.28205	0.0485651	ZFP36, EEF1A1, VIL1	181	33	16792	8.43395	1	0.833411	55.2391
GO:0006413~translational initiation	12	5.12821	2.59813e-07	RPS25, RPL30, RPS27, RPS28, RPS19, RPL41, RPS14, RPL34, RPS15, RPLP1, RPLP2, RPS21	181	137	16792	8.12614	0.00030861	6.17297e-05	0.000419505
GO:0035914~skeletal muscle cell differentiation	4	1.7094	0.015556	KLF5, EGR1, ATF3, BTG2	181	49	16792	7.57335	1	0.605956	22.3648
GO:0060337~type I interferon signaling pathway	5	2.13675	0.00491916	EGR1, IFITM2, IFITM3, HLA-B, GBP2	181	64	16792	7.24793	0.997144	0.341938	7.65356
GO:0019882~antigen processing and presentation	4	1.7094	0.0211458	HLA-DRB5, HLA-B, CD74, HLA-DRA	181	55	16792	6.74716	1	0.668437	29.1844
GO:0006364~rRNA processing	12	5.12821	2.00258e-05	RPS25, RPL30, RPS27, RPS28, RPS19, RPL41, RPS14, RPL34, RPS15, RPLP1, RPLP2, RPS21	181	214	16792	5.20225	0.0235101	0.00339293	0.0323297
GO:0006412~translation	14	5.98291	3.47173e-06	RPLP2, RPS25, RPL30, RPS27, RPS28, RPS19, RPL41, RPL34, RPS14, RPLP1, RPS15, SLC25A37, RPS21, SLC25A41	181	253	16792	5.13371	0.00411593	0.000687168	0.00560547
GO:0030334~regulation of cell migration	4	1.7094	0.0451486	RTN4, ENPP2, ABI3, SPATA13	181	74	16792	5.01478	1	0.820065	52.5721
GO:0006955~immune response	20	8.54701	1.37468e-07	CIITA, TCF7, CRIP1, CHIA, CEBPB, ENPP2, TNFRSF25, IFITM2, IFITM3, VTN, C1R, HLA-B, FTH1, CD74, CCL18, B2M, IL1RAP, HLA-DRB5, GBP2, HLA-DRA	181	421	16792	4.40729	0.000163298	4.08271e-05	0.000221961
GO:0070374~positive regulation of ERK1 and ERK2 cascade	7	2.99145	0.0115244	BMPER, CD44, CHI3L1, PDGFRB, CCL18, CD74, LGALS9	181	175	16792	3.71094	0.999999	0.555156	17.0689
GO:0042981~regulation of apoptotic process	8	3.4188	0.00817436	RTN4, EGR1, DIP2A, MCL1, NOS1AP, TNFRSF25, TPT1, PMAIP1	181	213	16792	3.48445	0.999942	0.477991	12.4123
GO:0032496~response to lipopolysaccharide	6	2.5641	0.031874	IL18BP, TNFRSF25, JUND, LGALS9, TRIB1, SOD2	181	164	16792	3.39415	1	0.772388	40.728
GO:0000122~negative regulation of transcription from RNA polymerase II promoter	17	7.26496	0.00469997	KLF5, ZFP36, CIITA, EGR1, TCF7, ARID5B, CBX8, FEZF2, N4BP2L2, ATF3, DKK1, BTG2, RPS14, JUND, MNT, FOXE1, UBC	181	720	16792	2.19048	0.99629	0.349827	7.32457
GO:0006915~apoptotic process	12	5.12821	0.0421327	RTN4, EPB41L3, CHIA, TNFRSF25, TRIM69, CSRNP1, VIL1, SIAH3, CHI3L1, BLID, PMAIP1, GADD45A	181	567	16792	1.96346	1	0.82854	50.0946

## Sheet: GO Cluster 3
Cluster 3 - Gene ontology results
GO term - Biological Process	Count	%	PValue	Genes	List Total	Pop Hits	Pop Total	Fold Enrichment	Bonferroni	Benjamini	FDR
GO:0007386~compartment pattern specification	4	0.232693	0.00239473	NOTCH1, DLL3, DLL1, LFNG	1449	4	16792	11.5887	0.999984	0.395454	4.42376
GO:0070458~cellular detoxification of nitrogen compound	3	0.17452	0.0210136	GSTM1, GSTM2, GSTM3	1449	3	16792	11.5887	1	0.688874	33.0203
GO:0097116~gephyrin clustering involved in postsynaptic density assembly	3	0.17452	0.0210136	NRXN2, NLGN2, NRXN1	1449	3	16792	11.5887	1	0.688874	33.0203
GO:1902083~negative regulation of peptidyl-cysteine S-nitrosylation	3	0.17452	0.0210136	ATP2B4, DMD, SNTA1	1449	3	16792	11.5887	1	0.688874	33.0203
GO:0097104~postsynaptic membrane assembly	5	0.290867	0.00071661	NRXN2, NLGN2, NLGN3, NRXN1, LRP4	1449	6	16792	9.65723	0.963502	0.224815	1.34371
GO:1902430~negative regulation of beta-amyloid formation	4	0.232693	0.00560212	ABCA7, APOE, CLU, SORL1	1449	5	16792	9.27095	1	0.523476	10.059
GO:1900271~regulation of long-term synaptic potentiation	3	0.17452	0.0396324	PAIP2, NF1, NLGN3	1449	4	16792	8.69151	1	0.808456	53.38
GO:2000741~positive regulation of mesenchymal stem cell differentiation	3	0.17452	0.0396324	SOX5, SOX6, SOX9	1449	4	16792	8.69151	1	0.808456	53.38
GO:0018916~nitrobenzene metabolic process	3	0.17452	0.0396324	GSTM1, GSTM2, GSTM3	1449	4	16792	8.69151	1	0.808456	53.38
GO:0003104~positive regulation of glomerular filtration	3	0.17452	0.0396324	F2RL1, GJA1, GAS6	1449	4	16792	8.69151	1	0.808456	53.38
GO:0019470~4-hydroxyproline catabolic process	3	0.17452	0.0396324	HOGA1, ALDH4A1, PRODH	1449	4	16792	8.69151	1	0.808456	53.38
GO:0097118~neuroligin clustering involved in postsynaptic membrane assembly	3	0.17452	0.0396324	MAGI2, NRXN2, NRXN1	1449	4	16792	8.69151	1	0.808456	53.38
GO:0046533~negative regulation of photoreceptor cell differentiation	3	0.17452	0.0396324	NOTCH1, SOX9, SOX8	1449	4	16792	8.69151	1	0.808456	53.38
GO:0006564~L-serine biosynthetic process	3	0.17452	0.0396324	PHGDH, PSAT1, PSPH	1449	4	16792	8.69151	1	0.808456	53.38
GO:0006537~glutamate biosynthetic process	4	0.232693	0.0104876	SLC1A3, GLUD2, GLUD1, ALDH4A1	1449	6	16792	7.72579	1	0.594089	18.0418
GO:0048708~astrocyte differentiation	5	0.290867	0.00290307	NOTCH1, HES5, S100B, PAX6, SOX6	1449	8	16792	7.24293	0.999999	0.415521	5.33866
GO:0071313~cellular response to caffeine	5	0.290867	0.00290307	GSTM2, SLC8A1, RYR3, RYR1, PPARGC1A	1449	8	16792	7.24293	0.999999	0.415521	5.33866
GO:0044070~regulation of anion transport	6	0.34904	0.000824745	LRRC8A, LRRC8D, TTYH1, RAB11B, AHCYL1, CA2	1449	10	16792	6.95321	0.977857	0.224321	1.54499
GO:0032808~lacrimal gland development	4	0.232693	0.017185	FGFR2, IGSF3, PAX6, SOX9	1449	7	16792	6.6221	1	0.671037	27.9006
GO:0019388~galactose catabolic process	4	0.232693	0.017185	GALK1, PGM5, PGM1, GALT	1449	7	16792	6.6221	1	0.671037	27.9006
GO:0097105~presynaptic membrane assembly	5	0.290867	0.00487042	PTPRD, NLGN2, NLGN3, NRXN1, LRP4	1449	9	16792	6.43816	1	0.505683	8.80188
GO:0051481~negative regulation of cytosolic calcium ion concentration	5	0.290867	0.00756753	SLC8A1, DRD2, GTF2I, RYR3, ATP1A2	1449	10	16792	5.79434	1	0.583968	13.3551
GO:0060009~Sertoli cell development	5	0.290867	0.00756753	ATRX, CST3, HSD17B4, SOX9, SOX8	1449	10	16792	5.79434	1	0.583968	13.3551
GO:0006884~cell volume homeostasis	5	0.290867	0.00756753	CLNS1A, LRRC8A, TRPV4, AQP1, ADD1	1449	10	16792	5.79434	1	0.583968	13.3551
GO:0048853~forebrain morphogenesis	5	0.290867	0.00756753	HESX1, SMO, GSX2, NF1, SLIT1	1449	10	16792	5.79434	1	0.583968	13.3551
GO:0010544~negative regulation of platelet activation	4	0.232693	0.0257542	APOE, PDGFA, C1QTNF1, PDGFRA	1449	8	16792	5.79434	1	0.722469	38.8833
GO:0030210~heparin biosynthetic process	4	0.232693	0.0257542	NDST3, XYLT2, NDST1, ANGPT1	1449	8	16792	5.79434	1	0.722469	38.8833
GO:0019934~cGMP-mediated signaling	4	0.232693	0.0257542	EDNRB, APOE, PDE9A, PDE3A	1449	8	16792	5.79434	1	0.722469	38.8833
GO:0006081~cellular aldehyde metabolic process	5	0.290867	0.011089	ALDH1A1, ALDH7A1, AKR7A2, ALDH3A2, ALDH9A1	1449	11	16792	5.26758	1	0.601304	18.9767
GO:0006012~galactose metabolic process	4	0.232693	0.0361961	GALK1, GALT, PPARGC1A, CHST1	1449	9	16792	5.15053	1	0.787277	50.1294
GO:0033673~negative regulation of kinase activity	4	0.232693	0.0361961	MYCNOS, CDKN1B, MSTN, PRDX3	1449	9	16792	5.15053	1	0.787277	50.1294
GO:0032930~positive regulation of superoxide anion generation	4	0.232693	0.0361961	EGFR, AGT, F2RL1, GSTP1	1449	9	16792	5.15053	1	0.787277	50.1294
GO:0060316~positive regulation of ryanodine-sensitive calcium-release channel activity	4	0.232693	0.0361961	GSTM2, ASPH, CALM2, CALM1	1449	9	16792	5.15053	1	0.787277	50.1294
GO:0007158~neuron cell-cell adhesion	7	0.407213	0.00152697	NCAM2, NRXN2, TNR, ASTN1, NLGN2, NLGN3, NRXN1	1449	16	16792	5.07005	0.999139	0.310244	2.84262
GO:0007026~negative regulation of microtubule depolymerization	8	0.465387	0.000695469	APC2, GAS2L2, GAS2L1, CLASP2, MID1IP1, C16ORF45, MAP6D1, APC	1449	19	16792	4.87944	0.959756	0.234888	1.30432
GO:0010881~regulation of cardiac muscle contraction by regulation of the release of sequestered calcium ion	8	0.465387	0.000695469	GSTM2, SLC8A1, ANK2, DMD, ASPH, ATP1A2, CALM2, CALM1	1449	19	16792	4.87944	0.959756	0.234888	1.30432
GO:0006554~lysine catabolic process	5	0.290867	0.0155144	GCDH, ALDH7A1, AASS, OGDH, PIPOX	1449	12	16792	4.82862	1	0.654191	25.5523
GO:0043116~negative regulation of vascular permeability	5	0.290867	0.0155144	RAMP2, TJP1, AMOT, ANGPT1, PDE3A	1449	12	16792	4.82862	1	0.654191	25.5523
GO:1901379~regulation of potassium ion transmembrane transport	6	0.34904	0.00681908	KCNN2, DPP10, KCNE1, DPP6, KCNIP1, KCNIP3	1449	15	16792	4.63547	1	0.555238	12.1137
GO:2000310~regulation of N-methyl-D-aspartate selective glutamate receptor activity	6	0.34904	0.00681908	CNIH2, DLG4, NLGN3, NRXN1, PPARGC1A, DAPK1	1449	15	16792	4.63547	1	0.555238	12.1137
GO:0001952~regulation of cell-matrix adhesion	4	0.232693	0.0484655	DDR1, BCL2, NF1, MINK1	1449	10	16792	4.63547	1	0.849836	60.8401
GO:0008593~regulation of Notch signaling pathway	4	0.232693	0.0484655	DTX1, LFNG, LLGL1, LLGL2	1449	10	16792	4.63547	1	0.849836	60.8401
GO:0016559~peroxisome fission	4	0.232693	0.0484655	FIS1, MFF, ACOX1, PEX11G	1449	10	16792	4.63547	1	0.849836	60.8401
GO:0007043~cell-cell junction assembly	7	0.407213	0.00304645	TJP1, CLDN5, AMOT, HEG1, TRPV4, NR1H4, GJC1	1449	18	16792	4.50671	0.999999	0.418371	5.59522
GO:0060038~cardiac muscle cell proliferation	5	0.290867	0.0209072	NOTCH1, NDRG4, RXRA, SMAD1, TGFB2	1449	13	16792	4.45719	1	0.691359	32.8827
GO:0086064~cell communication by electrical coupling involved in cardiac conduction	5	0.290867	0.0209072	SLC8A1, ATP1B2, GJA1, ATP1A2, GJA5	1449	13	16792	4.45719	1	0.691359	32.8827
GO:0010821~regulation of mitochondrion organization	5	0.290867	0.0209072	FIS1, MFF, STOX1, PINK1, MGARP	1449	13	16792	4.45719	1	0.691359	32.8827
GO:0050768~negative regulation of neurogenesis	6	0.34904	0.00922459	NOTCH1, SORL1, PAX6, DLL3, WNT7A, MT3	1449	16	16792	4.34576	1	0.597706	16.0449
GO:0048709~oligodendrocyte differentiation	9	0.52356	0.000853376	NOTCH1, PTPRZ1, ERBB2, NTRK2, OLIG1, CNP, NLGN3, SOX9, SOX8	1449	25	16792	4.17193	0.980602	0.218399	1.59821
GO:0022011~myelination in peripheral nervous system	5	0.290867	0.0273144	NF1, DAG1, LGI4, ADAM22, SIRT2	1449	14	16792	4.13881	1	0.739783	40.7041
GO:0000038~very long-chain fatty acid metabolic process	5	0.290867	0.0273144	ACOX1, ABCD2, ACOT1, HSD17B4, ACSBG1	1449	14	16792	4.13881	1	0.739783	40.7041
GO:0010801~negative regulation of peptidyl-threonine phosphorylation	5	0.290867	0.0273144	DMTN, SIRT2, CALM2, DDIT4, CALM1	1449	14	16792	4.13881	1	0.739783	40.7041
GO:0071625~vocalization behavior	5	0.290867	0.0273144	NRXN2, DLG4, NLGN3, MYH14, NRXN1	1449	14	16792	4.13881	1	0.739783	40.7041
GO:0010001~glial cell differentiation	5	0.290867	0.0273144	METRN, DTX1, DNER, KLF15, NFIB	1449	14	16792	4.13881	1	0.739783	40.7041
GO:0048663~neuron fate commitment	6	0.34904	0.012156	ID2, PAX6, OLIG1, ZNF521, OLIG2, TGFB2	1449	17	16792	4.09012	1	0.609897	20.6107
GO:0021537~telencephalon development	6	0.34904	0.012156	KAT2A, SLC1A2, SLC8A1, HES5, RFX4, TCTN1	1449	17	16792	4.09012	1	0.609897	20.6107
GO:0046847~filopodium assembly	6	0.34904	0.012156	ARHGEF4, DNM3, EZR, ITGA6, TTYH1, FGD4	1449	17	16792	4.09012	1	0.609897	20.6107
GO:1901216~positive regulation of neuron death	6	0.34904	0.012156	MAP3K5, TP53BP2, APOE, CLU, PARP1, DDIT4	1449	17	16792	4.09012	1	0.609897	20.6107
GO:0045662~negative regulation of myoblast differentiation	8	0.465387	0.0024907	NOTCH1, TBX3, MSTN, DLL1, ID3, SOX9, SOX8, CMTM5	1449	23	16792	4.03085	0.99999	0.393901	4.59712
GO:0009409~response to cold	12	0.69808	0.000149621	LPL, FOS, ADRB2, HSP90AA1, THRA, ADRB1, HSPA2, ACOT11, CIRBP, PCSK1N, GMPR, PPARGC1A	1449	36	16792	3.86289	0.498925	0.158652	0.281977
GO:0010880~regulation of release of sequestered calcium ion into cytosol by sarcoplasmic reticulum	6	0.34904	0.0156597	SRI, GSTM2, DMD, ASPH, CALM2, CALM1	1449	18	16792	3.86289	1	0.652281	25.7594
GO:0006103~2-oxoglutarate metabolic process	6	0.34904	0.0156597	ADHFE1, IDH2, IDH1, OGDH, GPT2, GHR	1449	18	16792	3.86289	1	0.652281	25.7594
GO:0006665~sphingolipid metabolic process	5	0.290867	0.0347672	SERINC5, PSAP, SERINC1, ALOX12B, SFTPB	1449	15	16792	3.86289	1	0.776691	48.7155
GO:0051604~protein maturation	5	0.290867	0.0347672	TSPAN33, TSPAN5, LMF1, SORL1, STUB1	1449	15	16792	3.86289	1	0.776691	48.7155
GO:0042026~protein refolding	5	0.290867	0.0347672	HSPA1L, HSP90AA1, HSPA2, HSPA1B, HSPA8	1449	15	16792	3.86289	1	0.776691	48.7155
GO:1903779~regulation of cardiac conduction	18	1.04712	2.78203e-06	FXYD1, SLC8A1, FXYD3, CORIN, ATP1B2, ATP1A4, ATP1A2, FXYD6, FXYD7, ATP2B2, ABCC9, ATP2B4, AGT, RYR3, RYR1, AHCYL1, ASPH, EHD3	1449	56	16792	3.72493	0.0127653	0.0127653	0.00524994
GO:0001502~cartilage condensation	7	0.407213	0.00908573	THRA, BMPR1B, SOX9, COL11A1, WNT7A, TGFB2, MYCN	1449	22	16792	3.68731	1	0.600003	15.8226
GO:1901687~glutathione derivative biosynthetic process	7	0.407213	0.00908573	GSTM1, GSTM2, GSTM3, GSTA4, GSTZ1, GSTM5, GSTP1	1449	22	16792	3.68731	1	0.600003	15.8226
GO:0006883~cellular sodium ion homeostasis	6	0.34904	0.019777	SLC8A1, SGK3, ATP1B2, AGT, ATP1A4, ATP1A2	1449	19	16792	3.65958	1	0.688906	31.4055
GO:0014002~astrocyte development	5	0.290867	0.0432815	PLP1, GFAP, DLL1, TLR4, MT3	1449	16	16792	3.62146	1	0.828204	56.6118
GO:0061036~positive regulation of cartilage development	5	0.290867	0.0432815	SOX5, SOX6, SMAD1, BMPR1B, SOX9	1449	16	16792	3.62146	1	0.828204	56.6118
GO:0030279~negative regulation of ossification	5	0.290867	0.0432815	NOTCH1, BCL2, TPH1, SOX9, LRP4	1449	16	16792	3.62146	1	0.828204	56.6118
GO:2000311~regulation of alpha-amino-3-hydroxy-5-methyl-4-isoxazole propionate selective glutamate receptor activity	5	0.290867	0.0432815	CNIH2, CACNG7, MINK1, NLGN2, NRXN1	1449	16	16792	3.62146	1	0.828204	56.6118
GO:0014003~oligodendrocyte development	7	0.407213	0.0114134	CD9, ASCL1, WASF3, ID2, HES5, HDAC11, GSTP1	1449	23	16792	3.52699	1	0.605447	19.4768
GO:0050808~synapse organization	10	0.581734	0.00147584	ATP2B2, WNT7B, TNR, LRRTM2, LRRTM1, CTNND2, NLGN2, NLGN3, PCDHGC3, LRP4	1449	33	16792	3.51172	0.998909	0.330486	2.74868
GO:0034614~cellular response to reactive oxygen species	6	0.34904	0.0245434	PDK2, FOS, SLC8A1, PDGFRA, PRDX3, NME8	1449	20	16792	3.4766	1	0.716644	37.4339
GO:0022904~respiratory electron transport chain	6	0.34904	0.0245434	NDUFA5, ALDH5A1, PINK1, PPARGC1A, MYBBP1A, ETFA	1449	20	16792	3.4766	1	0.716644	37.4339
GO:0007422~peripheral nervous system development	7	0.407213	0.0141319	EDNRB, ERBB2, NF1, UGT8, PMP22, SOX8, ALDH3A2	1449	24	16792	3.38003	1	0.647702	23.5543
GO:0005980~glycogen catabolic process	6	0.34904	0.0299889	PYGM, PHKG1, PGM1, PFKM, CALM2, CALM1	1449	21	16792	3.31105	1	0.758354	43.7065
GO:2000378~negative regulation of reactive oxygen species metabolic process	6	0.34904	0.0299889	PLIN5, BCL2, PINK1, SIRT2, MT3, MYCN	1449	21	16792	3.31105	1	0.758354	43.7065
GO:0050772~positive regulation of axonogenesis	6	0.34904	0.0299889	METRN, PLXNB1, NTRK2, PLXNB3, RHOA, ROBO2	1449	21	16792	3.31105	1	0.758354	43.7065
GO:0097150~neuronal stem cell population maintenance	6	0.34904	0.0299889	NOTCH1, HES5, SOX2, FOXO1, DLL1, FOXO3	1449	21	16792	3.31105	1	0.758354	43.7065
GO:0045747~positive regulation of Notch signaling pathway	9	0.52356	0.00589672	ASCL1, NOTCH1, ERH, TSPAN33, HES5, GSX2, TSPAN5, DLL1, LFNG	1449	33	16792	3.16055	1	0.531705	10.5606
GO:0050999~regulation of nitric-oxide synthase activity	7	0.407213	0.0208562	EGFR, HSP90AA1, ZDHHC21, WASL, DDAH1, CALM2, CALM1	1449	26	16792	3.12003	1	0.694859	32.8168
GO:0046487~glyoxylate metabolic process	7	0.407213	0.0208562	BCKDHB, HOGA1, GCSH, GRHPR, OGDH, PDHB, GLDC	1449	26	16792	3.12003	1	0.694859	32.8168
GO:0001654~eye development	8	0.465387	0.0121575	SALL2, CHRDL1, HIPK2, SOX2, CST3, PAX6, BMPR1B, TGFB2	1449	30	16792	3.09032	1	0.603875	20.6129
GO:0038128~ERBB2 signaling pathway	10	0.581734	0.00421783	EGFR, HSP90AA1, ERBB4, ERBB2, GAB1, UBB, EGF, NRG2, STUB1, PIK3R1	1449	38	16792	3.04965	1	0.478287	7.66663
GO:0072332~intrinsic apoptotic signaling pathway by p53 class mediator	7	0.407213	0.0249139	E2F1, ZMAT1, PDK2, TP53BP2, ZMAT3, MYBBP1A, WWOX	1449	27	16792	3.00447	1	0.718159	37.8808
GO:0051965~positive regulation of synapse assembly	16	0.930774	0.000192783	FLRT2, FLRT1, LRTM1, LRRN3, NLGN2, NLGN3, NRXN1, EPHB3, SLITRK2, SLITRK4, SLITRK3, LRRTM2, LRRTM1, NTRK2, LRRN1, WNT7A	1449	62	16792	2.99063	0.589491	0.137908	0.363181
GO:0009611~response to wounding	16	0.930774	0.000233122	GFAP, PDGFA, SOX2, PAX6, ITGB4, VASH1, TGFB2, SLC1A2, LYVE1, SLC1A3, BPTF, GRIN2C, ID3, DST, FABP5, F2R	1449	63	16792	2.94316	0.659275	0.142566	0.439017
GO:0045665~negative regulation of neuron differentiation	14	0.814427	0.000774241	DTX1, SOX3, SOX2, PAX6, HMG20A, DLL1, FOXO3, GPR37L1, ASCL1, HES5, ID2, PBX1, OLIG2, BMP7	1449	56	16792	2.89717	0.972036	0.225461	1.45103
GO:2000145~regulation of cell motility	7	0.407213	0.0294655	EGFR, ERBB4, ERBB2, CD81, RHOA, EGF, NRG2	1449	28	16792	2.89717	1	0.755699	43.1305
GO:0051482~positive regulation of cytosolic calcium ion concentration involved in phospholipase C-activating G-protein coupled signaling pathway	7	0.407213	0.0294655	S1PR1, DRD2, LPAR6, F2RL1, GPR65, LPAR4, F2R	1449	28	16792	2.89717	1	0.755699	43.1305
GO:0021762~substantia nigra development	12	0.69808	0.00256423	PLP1, GLUD1, RHOA, CNP, NDRG2, SYPL2, YWHAE, SIRT2, CALM2, MBP, CALM1, CKB	1449	49	16792	2.83804	0.999993	0.38984	4.72975
GO:0002027~regulation of heart rate	8	0.465387	0.0203575	SLC8A1, ANK2, DRD2, AGT, DMD, CALM2, SNTA1, CALM1	1449	33	16792	2.80938	1	0.690441	32.1681
GO:0030203~glycosaminoglycan metabolic process	7	0.407213	0.03453	B3GAT2, CHST9, BCAN, VCAN, CSPG5, NCAN, SDC3	1449	29	16792	2.79727	1	0.780546	48.4771
GO:0048008~platelet-derived growth factor receptor signaling pathway	7	0.407213	0.03453	TXNIP, ZFAND5, BCR, PDGFA, PIK3C2A, GAB1, PDGFRA	1449	29	16792	2.79727	1	0.780546	48.4771
GO:0050766~positive regulation of phagocytosis	7	0.407213	0.03453	ABCA7, SLC11A1, TUB, BCR, SFTPD, MERTK, GAS6	1449	29	16792	2.79727	1	0.780546	48.4771
GO:0045909~positive regulation of vasodilation	7	0.407213	0.03453	SCPEP1, EGFR, AGT, F2RL1, EPHX2, GJA1, GJA5	1449	29	16792	2.79727	1	0.780546	48.4771
GO:0050885~neuromuscular process controlling balance	11	0.639907	0.00505936	ATP2B2, IGDCC3, SLC1A3, BCR, RAC3, GRIN2C, TNR, DLG4, NLGN2, NRXN1, MYH10	1449	46	16792	2.77121	1	0.508258	9.1281
GO:0035338~long-chain fatty-acyl-CoA biosynthetic process	10	0.581734	0.00845058	ACOT11, HSD17B12, FASN, ACOT1, SCD5, ACOT6, ACSL6, ACSF2, ACSBG1, ACSL5	1449	42	16792	2.75921	1	0.606671	14.7985
GO:0060291~long-term synaptic potentiation	9	0.52356	0.0141539	GFAP, SERPINE2, S100B, TNR, LRRTM2, LRRTM1, NTRK2, NLGN3, VAMP2	1449	38	16792	2.74469	1	0.64249	23.5866
GO:0007585~respiratory gaseous exchange	8	0.465387	0.0237843	COX11, FUT8, HNMT, NDST1, ELN, SFTPD, SFTPB, TRAF4	1449	34	16792	2.72675	1	0.717257	36.5085
GO:0050919~negative chemotaxis	8	0.465387	0.0237843	SEMA5B, FLRT2, SEMA6A, PDGFA, RHOA, SEMA4B, SEMA3B, SLIT1	1449	34	16792	2.72675	1	0.717257	36.5085
GO:0090004~positive regulation of establishment of protein localization to plasma membrane	7	0.407213	0.0401231	RAMP3, EZR, SORBS1, DPP10, CLIP3, NRXN1, PIK3R1	1449	30	16792	2.70403	1	0.809641	53.8275
GO:0055072~iron ion homeostasis	7	0.407213	0.0401231	TF, SLC11A1, EIF2AK1, FBXL5, BDH2, NEO1, TMPRSS6	1449	30	16792	2.70403	1	0.809641	53.8275
GO:0031623~receptor internalization	10	0.581734	0.00988966	RAMP3, CD9, RAMP2, DNM3, RAB31, EZR, TFRC, CD81, RAMP1, GHR	1449	43	16792	2.69504	1	0.593413	17.1021
GO:0008277~regulation of G-protein coupled receptor protein signaling pathway	9	0.52356	0.0164977	RAMP3, GIT1, RAMP2, RGS11, RGS12, PDCL, RGS9, RGS16, RAMP1	1449	39	16792	2.67431	1	0.661083	26.9431
GO:0006635~fatty acid beta-oxidation	10	0.581734	0.0115058	ACAA2, ACOX1, ECH1, ABCD2, ECHDC2, ABCD3, BDH2, HSD17B4, DECR1, HADH	1449	44	16792	2.63379	1	0.595778	19.6187
GO:1990090~cellular response to nerve growth factor stimulus	7	0.407213	0.0462574	KAT2A, E2F1, MAGI2, BPTF, ACAP2, FOXO3, KIDINS220	1449	31	16792	2.6168	1	0.843315	59.0891
GO:0007628~adult walking behavior	7	0.407213	0.0462574	SCN1A, DRD2, MAPT, HIPK2, PCDH15, KCNJ10, OXR1	1449	31	16792	2.6168	1	0.843315	59.0891
GO:0007190~activation of adenylate cyclase activity	9	0.52356	0.0191087	PRKCA, ADRB2, ADCY2, ADRB1, ADCY8, TSHR, VIPR2, CALM2, CALM1	1449	40	16792	2.60745	1	0.680909	30.5176
GO:0043410~positive regulation of MAPK cascade	18	1.04712	0.000461112	FGFR2, FGFR3, LAMTOR1, PDGFA, PSAP, SOX2, TIMP2, GPR37L1, TRIM5, ADRB2, GPR37, EPHA8, C1QTNF1, NTRK2, ALOX12B, PELI2, BANK1, F2R	1449	81	16792	2.57526	0.881152	0.233744	0.866605
GO:0042769~DNA damage response, detection of DNA damage	8	0.465387	0.0317829	RPA1, MRPS26, ZBTB32, RFC1, DDB1, SOX4, UBB, PARP1	1449	36	16792	2.57526	1	0.761693	45.639
GO:0030900~forebrain development	10	0.581734	0.0153185	E2F1, ATRX, NOTCH1, NDST1, SOX2, DYNC2H1, PCDH9, CNP, TOP2B, PPARGC1A	1449	46	16792	2.51928	1	0.654929	25.2722
GO:0051898~negative regulation of protein kinase B signaling	8	0.465387	0.0363844	PHLPP1, MTM1, MAGI2, DRD2, DAG1, MSTN, BANK1, PDCD6	1449	37	16792	2.50566	1	0.786036	50.3129
GO:0032956~regulation of actin cytoskeleton organization	10	0.581734	0.0175395	DMTN, EZR, LRP1, PDGFA, HIP1R, RHOA, GPM6B, CLASP2, TGFB2, EPHA3	1449	47	16792	2.46568	1	0.673525	28.3897
GO:0006633~fatty acid biosynthetic process	11	0.639907	0.0122685	LPL, SC5D, FAXDC2, PRKAG2, HSD17B12, FASN, ABCD3, SCD5, ACACB, PCCB, HSD17B8	1449	52	16792	2.45145	1	0.601263	20.781
GO:0006816~calcium ion transport	16	0.930774	0.00187633	SRI, RAMP3, RAMP2, CACHD1, CAMK2G, CACNG7, CACNG6, SLC3A2, ANXA6, ATP2B2, RYR3, RYR1, TRPV4, TRPV6, PPP3CA, RAMP1	1449	76	16792	2.43972	0.999829	0.351863	3.48215
GO:0001942~hair follicle development	8	0.465387	0.0414041	EGFR, ZDHHC21, SOX21, PDGFA, LHX2, SOX9, LRP4, TGFB2	1449	38	16792	2.43972	1	0.816959	54.9766
GO:0007154~cell communication	8	0.465387	0.0414041	SLC8A1, KREMEN2, GJB7, FREM1, NF1, GJA5, GJC1, GJA3	1449	38	16792	2.43972	1	0.816959	54.9766
GO:0071456~cellular response to hypoxia	20	1.16347	0.000480691	E2F1, ACAA2, SLC8A1, KCND2, PINK1, FOXO3, AQP1, PPARGC1A, SIRT2, NDNF, FMN2, S100B, BCL2, ENDOG, HIPK2, RGCC, BMP7, MPL, MGARP, MT3	1449	96	16792	2.41431	0.89143	0.21863	0.903242
GO:0051592~response to calcium ion	12	0.69808	0.00982278	TXNIP, EGFR, GDI1, SLC6A1, PCDH15, AHCYL1, TRPV6, PPP3CA, PDCD6, CALM2, MTTP, CALM1	1449	58	16792	2.39766	1	0.598166	16.9963
GO:0000302~response to reactive oxygen species	8	0.465387	0.0468524	NUDT2, APOD, APOE, PRDX2, PRDX3, PPARGC1A, PRDX1, GSTP1	1449	39	16792	2.37717	1	0.844663	59.5681
GO:0009636~response to toxic substance	17	0.988947	0.00225108	CYP2F1, SLC6A1, DRD2, GABRB1, SLC22A8, EPHX2, CST3, TTPA, CDH1, CNP, SLC7A11, MBP, FOS, BCL2, PON2, PON3, GSTP1	1449	85	16792	2.31774	0.99997	0.390783	4.16371
GO:0007416~synapse assembly	12	0.69808	0.014242	DNM3, NRXN2, GPM6A, DRD2, PCDHB3, DNER, SDK2, NLGN2, CDH1, NLGN3, NRXN1, WNT7A	1449	61	16792	2.27974	1	0.639085	23.7153
GO:0007269~neurotransmitter secretion	10	0.581734	0.0287912	PPFIA2, CPLX1, NRXN2, BAIAP3, PTPRN2, CASK, NRXN1, VAMP2, WNT7A, HSPA8	1449	51	16792	2.27229	1	0.751129	42.3802
GO:0007417~central nervous system development	23	1.33799	0.000549162	SH3GL3, HAPLN1, GRIK1, ALDH5A1, PTPRZ1, SOX3, HPCAL4, POU6F2, ARNT2, PAX6, BCAN, TIMP2, ALDH3A2, MBP, S100B, DNER, ROBO2, VCAN, UGT8, ADAM22, ID3, NCAN, GSTP1	1449	120	16792	2.22116	0.920875	0.205952	1.03127
GO:0009267~cellular response to starvation	9	0.52356	0.0459895	SREBF1, CADPS2, ALB, FADS1, PDK4, FOXO1, GAS2L1, GAS6, HSPA8	1449	47	16792	2.21911	1	0.844059	58.8717
GO:0031532~actin cytoskeleton reorganization	9	0.52356	0.0459895	EZR, S1PR1, TNIK, NPHS2, GPR65, RHOA, MINK1, TRPV4, ANTXR1	1449	47	16792	2.21911	1	0.844059	58.8717
GO:0010976~positive regulation of neuron projection development	17	0.988947	0.00364546	MAGI2, PLXNB3, SNX3, KIDINS220, FIG4, GPRC5B, CBFA2T2, NDNF, EPHA3, PRKD1, RGMA, NDRG4, DMD, NTRK2, CNTN1, NEGR1, FEZ1	1449	89	16792	2.21357	1	0.46455	6.65991
GO:0001764~neuron migration	20	1.16347	0.00149414	SDCCAG8, HSP90AA1, TUBB2B, ASTN1, PAX6, GJA1, YWHAE, NDNF, GAS6, DDIT4, SEMA6A, ASCL1, POMGNT2, GPM6A, DNER, MAPT, NTRK2, TOP2B, APBB2, MYH10	1449	105	16792	2.20737	0.998997	0.318607	2.78231
GO:0072659~protein localization to plasma membrane	12	0.69808	0.0179275	RAMP3, RAMP2, ZDHHC22, TNIK, ANK2, P2RY1, DPP10, CDH1, MAP7, DPP6, RAMP1, KCNIP3	1449	63	16792	2.20737	1	0.666867	28.9215
GO:0060041~retina development in camera-type eye	11	0.639907	0.0253685	TUB, LHX2, NTRK2, PAX6, DLL1, TGIF2, BMPR1B, MERTK, SOX9, SOX8, MYH10	1449	58	16792	2.19785	1	0.720835	38.4251
GO:0034599~cellular response to oxidative stress	12	0.69808	0.0200159	PRKD1, PYCR2, FOXO1, PINK1, PRDX2, HSPA1B, PRDX3, FOXO3, PARP1, PPARGC1A, SIRT2, MT3	1449	64	16792	2.17288	1	0.688743	31.7204
GO:0014068~positive regulation of phosphatidylinositol 3-kinase signaling	12	0.69808	0.0222784	PRR5, ERBB4, PDGFA, PLXNB1, AGT, NTRK2, F2RL1, PDGFRA, ANGPT1, SOX9, TGFB2, F2R	1449	65	16792	2.13945	1	0.705966	34.6347
GO:0007409~axonogenesis	18	1.04712	0.00407487	FGFR2, DRD2, PTPRZ1, CNP, LLGL1, SLITRK2, LINGO1, SLITRK4, NOTCH1, SLITRK3, S100B, ULK2, BCL2, LRRN1, STMN1, TOP2B, OMG, WNT7A	1449	98	16792	2.12853	1	0.478065	7.41614
GO:0045732~positive regulation of protein catabolic process	11	0.639907	0.0313964	RAB7A, CDKN1B, APC2, VCP, SORL1, NDFIP1, FOXO1, GJA1, TNFSF12, SOX9, APC	1449	60	16792	2.12459	1	0.760745	45.2281
GO:0000226~microtubule cytoskeleton organization	13	0.756254	0.0176049	DYNC1LI2, SPECC1, CNP, GABARAP, MAPT, MAP2, NINL, DCLK2, MAP7, MAP6, CLASP2, DST, MAP6D1	1449	71	16792	2.12187	1	0.669923	28.4797
GO:0006950~response to stress	11	0.639907	0.03476	HSP90AA4P, EGFR, SNN, HSP90AA1, EIF2AK1, SGK3, NDRG4, MINK1, PINK1, GADD45B, TP53INP1	1449	61	16792	2.08976	1	0.779699	48.7082
GO:0048015~phosphatidylinositol-mediated signaling	19	1.10529	0.00401974	EGFR, FGFR2, FGFR3, ERBB4, PIK3C2A, PDGFA, ERBB2, PI4KAP1, PRR5, TNRC6C, EZR, CA8, GAB1, RHOA, PDGFRA, FGF1, EGF, NRG2, PIK3R1	1449	106	16792	2.07722	1	0.485369	7.31938
GO:0006749~glutathione metabolic process	10	0.581734	0.0489374	GSTM1, GSTM2, GSTM3, GSTA4, ALDH5A1, IDH1, GSTZ1, HMGN5, GSTM5, GSTP1	1449	56	16792	2.06941	1	0.850321	61.2049
GO:0006936~muscle contraction	19	1.10529	0.00445304	FXYD1, SLC8A1, GJA1, HSBP1, CACNG1, SSPN, GJC1, MYOM2, SORBS1, SNTB1, RYR1, GAMT, CHRNB1, MYOM1, ASPH, LMOD1, CALM2, SNTA1, CALM1	1449	107	16792	2.0578	1	0.485645	8.07734
GO:0030334~regulation of cell migration	13	0.756254	0.0238174	DDX58, PLXNC1, SERPINE2, SGK3, ERBB4, GSX2, PLXNB1, GAB1, RHOA, PAX6, AMOT, MINK1, PRKX	1449	74	16792	2.03585	1	0.713719	36.5492
GO:0001938~positive regulation of endothelial cell proliferation	12	0.69808	0.0332169	PRKCA, PRKD1, ACVRL1, AGGF1, NRARP, F3, NF1, PLXNB3, NR4A1, TNFSF12, PDCD6, THBS4	1449	69	16792	2.01542	1	0.773662	47.1386
GO:0008152~metabolic process	29	1.68703	0.000535339	FTCDNL1, ECH1, ATP6AP2, ARSG, ECHDC2, GSTM5, ACSF2, ACSBG1, GSTM1, GSTM2, ACSS1, GSTM3, FASN, GALC, UGT8, FAHD2B, FAHD2A, AGPAT3, ACSL6, ACAA2, GSTA4, ACO1, HOGA1, BCKDHB, EPHX2, NPL, GRHPR, CPE, GSTP1	1449	168	16792	2.00043	0.915656	0.219082	1.00544
GO:0034220~ion transmembrane transport	36	2.09424	0.00011606	FXYD1, FXYD3, GRIK1, ATP1B2, GABRB1, GRIK4, AQP4, GJA1, FXYD6, FXYD7, TPCN1, GJC1, ANXA6, ATP2B2, ATP2B4, TTYH1, SLC9B1, DLG4, ANO5, ASPH, PIEZO2, SGK3, NCALD, ATP1A4, ATP1A2, ATP13A5, ATP13A4, ATP6V0E2, GRIA2, RYR3, RYR1, UBB, CALM2, CLCN4, ATP8A1, CALM1	1449	210	16792	1.98663	0.414914	0.163614	0.218794
GO:0031647~regulation of protein stability	12	0.69808	0.0364581	KAT2A, PRKD1, SREBF1, TF, MYCNOS, TADA2A, ANK2, BCL2, CD81, SOX4, STUB1, HSPA8	1449	70	16792	1.98663	1	0.783753	50.3846
GO:0030855~epithelial cell differentiation	12	0.69808	0.0364581	FGFR2, TST, F11R, CBR1, DNPH1, CNN3, ALDOC, BDH2, ID3, UPK3A, BMP7, CBFA2T2	1449	70	16792	1.98663	1	0.783753	50.3846
GO:0007219~Notch signaling pathway	19	1.10529	0.00948577	DTX4, KAT2B, DTX1, DLL3, PGAM2, DLL1, SPEN, SOX9, ASCL1, NOTCH1, CDKN1B, HES5, NRARP, DNER, ETV2, CNTN1, UBB, NR1H4, ZNF423	1449	115	16792	1.91465	1	0.60027	16.4616
GO:0002576~platelet degranulation	17	0.988947	0.0149186	TF, RARRES2, PDGFA, PSAP, CLU, F8, PCDH7, GAS6, TGFB2, CD9, LGALS3BP, ALB, SCG3, EGF, CALM2, CALM1, ITGA2B	1449	103	16792	1.9127	1	0.650662	24.6974
GO:0032355~response to estradiol	15	0.8726	0.0235836	TXNIP, RAMP2, CD38, CDKN1B, SLC6A1, ENDOG, ADCYAP1R1, ARNT2, CST3, CD4, F7, BMP7, WNT7A, GSTP1, GHR	1449	91	16792	1.91022	1	0.718275	36.2618
GO:0001649~osteoblast differentiation	17	0.988947	0.0162655	ERH, PHB, NF1, SOX2, GJA1, CCDC47, LRRC17, SOX8, SMO, FASN, H3F3A, VCAN, H3F3B, HSD17B4, MYBBP1A, WWOX, ADAR	1449	104	16792	1.8943	1	0.661043	26.6168
GO:0046854~phosphatidylinositol phosphorylation	15	0.8726	0.0303096	FGFR2, EGFR, FGFR3, ERBB4, PIK3C2A, PDGFA, ERBB2, PI4KAP1, GAB1, PIKFYVE, PDGFRA, FGF1, EGF, NRG2, PIK3R1	1449	94	16792	1.84926	1	0.755191	44.0566
GO:0006813~potassium ion transport	13	0.756254	0.0480223	KCNJ16, KCNC4, ATP1B2, ATP1A4, KCNJ10, ATP1A2, AQP1, GJA5, ABCC9, CDKN1B, SLC24A4, SLC24A3, KCNN2	1449	82	16792	1.83723	1	0.849517	60.4945
GO:0006629~lipid metabolic process	24	1.39616	0.00831912	SREBF1, LPL, ACOX1, SC5D, FADS1, PTPRN2, SLC16A11, CLU, TTPA, ABHD4, HMGCS1, ABHD3, FADS2, PDE3A, ABCA2, MID1IP1, LPIN2, MTTP, APOD, PLIN1, PEMT, PLCD3, PLTP, FABP5	1449	157	16792	1.77152	1	0.609738	14.5851
GO:0007156~homophilic cell adhesion via plasma membrane adhesion molecules	24	1.39616	0.00896573	PCDHA6, PCDHGA11, CADM2, CDHR1, PCDHB3, PLXNB3, PCDHA5, SDK2, PCDH10, PCDH9, PCDH15, CDH1, CELSR2, PTPRT, PCDH7, PCDHGC3, PCDHGA2, PCDH18, CDH20, FAT3, FAT1, ROBO2, CD200, CDH10	1449	158	16792	1.76031	1	0.603164	15.63
GO:0007411~axon guidance	24	1.39616	0.00965258	FLRT2, PAX6, NEO1, NRXN1, EPHB3, SLIT1, TGFB2, NCAM1, SEMA6A, EZR, EPHA8, TNR, LHX2, MEG3, ETV1, SPTBN1, ROBO2, SEMA3B, ROBO3, APBB2, BMP7, FEZ1, MYH10, SPTAN1	1449	159	16792	1.74923	1	0.599133	16.7267
GO:0007155~cell adhesion	69	4.01396	6.88189e-06	PCDHA6, MTSS1, ATP1B2, MYBPC1, PCDHA5, CASK, BCAN, PRKX, S1PR1, DGCR6, ROBO2, SPON1, PRKCA, F11R, MAGI1, MPDZ, PCDHB3, PTPRT, SSPN, SSPO, SIRPA, NCAM1, NCAM2, DDR1, PGM5, HEPACAM, HES5, LSAMP, CNTN1, VCAN, NCAN, DST, ITGA2B, PLXNC1, OLFM4, ITGAE, CTNND2, ITGB4, COL28A1, PCDHGC3, NEO1, ALCAM, IGSF11, CD9, LGALS3BP, AGGF1, SORBS1, ITGB8, TNR, FAT1, CD4, APC, THBS4, HAPLN1, FLRT1, PCDH10, EFS, GAS6,…	1449	459	16792	1.74209	0.031281	0.0157648	0.0129863
GO:0007050~cell cycle arrest	21	1.22164	0.0183904	KAT2B, CAB39L, LAMTOR1, AK1, SOX2, WDR6, PRKAG2, RPRM, FOXO4, VASH1, GAS6, MLF1, JMY, TGFB2, CDKN1B, HEPACAM, RHEB, GAS2L1, APBB2, TP53INP1, APC	1449	141	16792	1.72597	1	0.671499	29.5512
GO:0007420~brain development	28	1.62885	0.00680937	SLC38A3, ARNT2, HMGCS1, CKB, HESX1, CD9, S1PR1, APOD, HNMT, NDRG4, SRR, ROBO2, MT3, BCR, SPHK2, SLC6A11, NF1, CST3, SLC7A11, DDIT4, PCDH18, HES5, BPTF, PHGDH, H3F3A, EPOR, H3F3B, STMN1	1449	190	16792	1.70781	1	0.564103	12.0975
GO:0050821~protein stabilization	20	1.16347	0.0244406	HSP90AA1, ATP1B2, USP2, WFS1, HIP1R, SWSAP1, PHB, CLU, ZSWIM7, SOX4, PINK1, HSPA1B, PPARGC1A, SMO, GOLGA7, PFN2, ANK2, PIK3R1, MT3, HIP1	1449	136	16792	1.70422	1	0.719072	37.3093
GO:0030036~actin cytoskeleton organization	19	1.10529	0.0302764	DMTN, MTSS1, BCR, WASF3, PDGFA, SPECC1, NF1, DAAM2, ELMO1, ARHGEF11, PFN2, RAC3, CFL1, RHOA, AMOT, TESK2, IQSEC1, FGD4, ADD1	1449	130	16792	1.69373	1	0.758229	44.0204
GO:0001701~in utero embryonic development	27	1.57068	0.0102907	FGFR2, ZFAND5, RARRES2, ACVRL1, FUT8, ARNT2, GJA1, SOX6, SOX8, APBA2, HEG1, ANGPT1, TCTN1, KAT2A, TBX3, RXRA, KIDINS220, SMO, NOTCH1, WNT7B, ENDOG, TANC2, AMOT, ZFPM2, MYH10, ADAR, ADD1	1449	187	16792	1.67323	1	0.593958	17.7335
GO:0016055~Wnt signaling pathway	27	1.57068	0.0102907	ZBTB33, APC2, DRD2, NDP, CTNND2, CXXC4, SNX3, LGR6, CALCOCO1, TCF7L1, AES, ETV2, NDRG2, WWOX, APC, TNIK, DDB1, CELSR2, SKP1, WNT7B, CPE, KREMEN2, DACT3, UBB, DST, WNT7A, LRP4	1449	187	16792	1.67323	1	0.593958	17.7335
GO:0001525~angiogenesis	32	1.86155	0.00546301	FGFR2, ACVRL1, PDGFA, TNFSF12, EPHB3, GJA5, RNF213, PRKX, TGFB2, TSPAN12, S1PR1, AGGF1, APOD, HOXA7, PLCD3, ANGPT1, RAPGEF3, VEZF1, FGF1, EGF, RAMP1, PRKCA, RAMP2, NRXN1, ARHGAP24, TMPRSS6, NDNF, VASH1, PRKD1, HIF3A, WNT7A, PDCD6	1449	223	16792	1.66295	1	0.524809	9.8213
GO:0070588~calcium ion transmembrane transport	17	0.988947	0.0495635	SLC8A1, CACNG7, TRPV2, CACNG6, TRPV3, CACNG1, GAS6, ORAI3, ATP2B2, ATP2B4, SLC24A4, GPM6A, SLC24A3, RYR3, TRPV4, TRPV6, ASPH	1449	119	16792	1.65553	1	0.851704	61.6841
GO:0046777~protein autophosphorylation	24	1.39616	0.0230776	EGFR, FGFR2, STK33, TNIK, BCR, FGFR3, ERBB4, ERBB2, CAMK2G, TAOK3, STK17B, MINK1, WNK2, EPHB3, PRKX, DAPK1, PRKD1, DDR1, EIF2AK1, CAMK4, EPHA8, ULK2, NTRK2, PDGFRA	1449	172	16792	1.61703	1	0.714564	35.6356
GO:0055085~transmembrane transport	34	1.97789	0.00645588	ABCA8, SLC22A17, ABCA7, DMTN, ABCA9, SLC44A2, SLC6A1, SLC15A2, SLC16A11, ABCA2, SLC47A1, GJA5, SLC47A2, ABCA5, GJA3, BCL2, SLC25A23, SLC25A48, SLC35B4, SLC18B1, ABCD2, ABCD3, SLC22A3, SLC25A42, ABCA10, SLC25A5, SLC6A11, ABCC9, SLC16A9, SLC14A1, ADD3, SLC46A1, SLC5A12, ADD1	1449	244	16792	1.61482	1	0.554419	11.5052
GO:0030198~extracellular matrix organization	26	1.51251	0.0309679	HAPLN1, F11R, GFAP, ADAMTSL2, PDGFA, ITGAE, HSD17B12, NF1, ELN, ITGB4, DAG1, BCAN, CDH1, SOX9, TMPRSS6, NDNF, DDR1, ITGA6, ITGB8, TNR, VCAN, VWA1, APBB2, NCAN, COL11A1, ITGA2B	1449	196	16792	1.53727	1	0.759305	44.769
GO:0007399~nervous system development	38	2.21059	0.00885472	PCDHA6, GDA, FUT9, GRIK1, ERBB4, CAMK2G, NDP, SERF1A, PCDHA5, BEX1, FGF11, CNTFR, GPM6B, CSPG5, FOS, EDNRB, SRRM4, SCRG1, ATXN10, DLG4, APBA2, DLG2, OLFM1, ZNF423, KIF2A, SCN2B, CYP46A1, MOBP, PCDHB3, HES6, PCDH18, SEMA6A, CHRDL1, LSAMP, MPPED2, RGS9, TSHR, FEZ1	1449	287	16792	1.53439	1	0.615261	15.4515
GO:0055114~oxidation-reduction process	78	4.53752	0.00016911	TM7SF2, LDHB, SC5D, ALDH1L1, HR, PRDX2, PRDX1, BBOX1, GLDC, CRYL1, AKR7A2, ALOX12B, SMOX, ASPH, SCD5, GFOD1, HIGD1A, WWOX, OXR1, ALDH6A1, AIFM3, CYP11A1, FAXDC2, F8, GRHPR, GMPR, DHRS7B, CDO1, MOXD1, DHRS7, ALDH7A1, PYCR2, DHRS4, NNT, CYP27A1, TXNRD3, TPH1, ALDH9A1, DEGS2, PRODH, TMX1, PHYHD1, CYP2F1, ADHFE1, HSD17B14, GLUD2, GLUD1, HSD17B12, DHRS4L2, DHRS4L1, AASS, SESN1, ALDH3A2, PIPOX, ALDH1A1…	1449	592	16792	1.52689	0.542059	0.144614	0.318651
GO:0010628~positive regulation of gene expression	34	1.97789	0.0176948	E2F1, STOX1, ERBB2, MITF, PAX6, GJA1, TLR4, HSPA1B, HMGN5, CALCOCO1, TGFB2, SLC11A1, EZR, ANK2, ITGB8, C1QTNF1, ALOX12B, TRPV4, QKI, OLFM1, MT3, RAMP2, PLP1, PHB, EPHX2, SMAD1, GAS6, MYCN, DDX58, SMO, ID2, RGCC, NTRK2, CNTN1	1449	262	16792	1.50387	1	0.666889	28.6029
GO:0006810~transport	44	2.55963	0.010564	ABCA8, SRI, GRIK1, SLC6A1, ATP1B2, SLC15A2, SLC20A2, GABRB1, TRPV2, GRIK4, SORL1, TTPA, AQP4, GJA1, MFSD2B, ABCA2, SYPL2, GJC1, GJA3, SLC7A7, ATP2B2, PEA15, GRIN2C, ALB, SLC25A48, TMED10, PITPNC1, LAPTM4B, MLC1, LAPTM4A, SLC25A5, GOLIM4, CACNG1, DBI, SLC25A11, LYVE1, SLC6A9, CNIH2, MAP6, DYNLRB2, PMP2, CLCN4, SLC25A53, FEZ1	1449	348	16792	1.46524	1	0.590048	18.1612
GO:0000165~MAPK cascade	33	1.91972	0.0284539	FGFR2, FGFR3, NDST1, ERBB4, PDGFA, CAMK2G, ERBB2, ITPKB, IL17RD, PEA15, MAP3K5, GRIN2C, DLG4, KBTBD7, ANGPT1, EGF, FGF1, NRG2, EGFR, TAOK3, NF1, SMAD1, NCAM1, PSMC5, MAPK4, PDGFRA, PEBP1, SPTBN1, PSME3, UBB, CALM2, SPTAN1, CALM1	1449	262	16792	1.45964	1	0.750576	42.0013
GO:0035556~intracellular signal transduction	50	2.90867	0.00890226	ZBTB33, NRG3, ADCY2, ADCY8, PREX1, PRKAG2, PINK1, PPP1R1C, PPP1R1B, PPP1R1A, ACOT11, RAPGEF3, NRG2, AKT3, PAG1, SHC4, ARHGEF4, PRKCA, TNIK, BCR, SGK3, PLXNB1, MINK1, WNK2, DAPK1, PRKD1, FMN2, MAST4, TNS3, CAMK4, STMN1, RALGPS1, DRD2, STK17B, ASB16, RGS11, DGKB, RAC3, DGKG, PIKFYVE, PLCD3, DCLK2, EFS, YWHAE, TMPRSS6, WSB1, CHN1, RGS7, RGS9, APBB2	1449	403	16792	1.4378	1	0.608792	15.528
GO:0043547~positive regulation of GTPase activity	66	3.83944	0.00991983	PDGFA, PREX1, RCBTB2, S1PR1, SMAP1, GRIN2C, DLG4, RGN, ANGPT1, RAPGEF3, FGF1, NRG2, ARHGEF4, EGFR, F11R, BCR, PLXNB1, ARHGEF6, PSD2, ARHGAP24, ELMO1, ARHGEF11, NCAM1, ARHGAP31, ARHGAP32, ADRB1, FNBP1L, ACAP2, RIN2, SRGAP3, PDGFRA, SRGAP1, FGFR2, SNX18, RALGPS1, FGFR3, ARHGEF26, ERBB4, ERBB2, CAMK2G, LLGL1, LLGL2, ALDH1A1, RGS11, RGS12, EGF, CDC42EP4, IQSEC1, FGD4, GIT1, GDI1, LAMTOR1, NF1, RGS16,…	1449	565	16792	1.35372	1	0.587433	17.1497
GO:0007165~signal transduction	123	7.15532	0.0114885	SLC22A17, KLRC2, SLC44A2, KLRC3, ADCY8, GABRB1, FGF11, IL13, ITPKB, TNFSF12, VIPR2, IL17RD, SHD, TMEM9B, ANK2, PPP1R1B, PPP1R1A, PITPNC1, PRKACB, RAPGEF3, MX1, ITPK1, PAG1, EGFR, CASKIN1, SH3GL3, CASKIN2, BCR, MAGI2, DFFA, PLXNB1, SPARCL1, PTPRT, RND2, CD38, CAMK4, STMN1, SRI, LITAF, ERBB4, RHPN1, ERBB2, AKAP10, CNTFR, CXXC5, SOX9, SOX8, ALCAM, LGALS3BP, HNRNPK, NDRG3, NDRG2, EGF, NR1H4, TRAF4, T…	1449	1161	16792	1.22774	1	0.601489	19.5922
GO:0045944~positive regulation of transcription from RNA polymerase II promoter	102	5.93368	0.0335188	THRA, ARNT2, F2RL1, FOXO1, CASK, TLR4, FOXO3, FOXO4, S1PR1, SPX, GATA4, PSIP1, WWOX, EGFR, RXRA, DLL1, MED13, PPARGC1A, ASCL1, SPAG8, HES5, RGCC, FGFR2, CNBP, DRD2, SOX2, BEX1, CHCHD2, SOX4, SOX6, SOX9, SOX8, MED12L, SLC11A1, HNRNPK, LHX2, HOXA7, P2RY1, TFDP2, TEF, AUTS2, TCF4, NR1H4, SREBF1, RFX4, KLF12, SUB1, NR4A1, SMAD1, KLF15, DDX58, NOTCH1, ITGA6, HOXB5, TRPS1, EAF2, PARP1, BMP7, TCF12, E2F…	1449	981	16792	1.20494	1	0.773569	47.4492

## Sheet: GO Cluster 4
Cluster 4 - Gene ontology results
GO term - Biological Process	Count	%	PValue	Genes	List Total	Pop Hits	Pop Total	Fold Enrichment	Bonferroni	Benjamini	FDR
GO:1900102~negative regulation of endoplasmic reticulum unfolded protein response	3	0.142993	0.0309428	RACK1, CREBRF, XBP1	1770	3	16792	9.48701	1	0.734703	44.9458
GO:0075525~viral translational termination-reinitiation	4	0.190658	0.00990945	EIF3D, EIF3B, EIF3G, EIF3L	1770	5	16792	7.5896	1	0.501771	17.2303
GO:0006614~SRP-dependent cotranslational protein targeting to membrane	70	3.33651	3.06184e-47	RPL18, RPL17, RPL36A, RPL19, RPL14, RPL13, RPL15, RPLP2, RPS2, RPS3, RPS3A, RPLP0, RPLP1, RPL26L1, FAU, RPL10, RPL11, RPL12, RPL35A, SRPRA, RPS4X, RPS18, RPS19, RPS16, RPL41, RPS14, RPS15, RPS12, RPS13, RPS10, SRP72, RPS11, UBA52, RPL35, RPL27A, RPS15A, RPL36, RPL37, RPL39, RPS25, RPS27, RPL30, RPS28, RPS29, RPL32, RPL7, RPL31, RPL34, RPL9, RPL8, RPL5, RPS20, RPL7A, RPL4, RPS21, RPS23, RPS24, RPS…	1770	94	16792	7.06479	1.49938e-43	7.49691e-44	5.81409e-44
GO:0002181~cytoplasmic translation	18	0.85796	1.06731e-11	RPL35A, RPL36A, RPL15, RPL26, RPLP2, RPL36, RPL29, EIF4B, RPL7, RPL22, RPL31, RPLP0, RPL9, EIF4H, RPLP1, RPL8, RPL7L1, RPL26L1	1770	25	16792	6.83064	5.22658e-08	6.53322e-09	2.02669e-08
GO:0051099~positive regulation of binding	5	0.238322	0.00330551	S100A10, CLIC2, RARA, DPH3, ANXA2	1770	7	16792	6.77643	1	0.291763	6.09363
GO:0007044~cell-substrate junction assembly	4	0.190658	0.0182732	TLN1, ITGA5, ITGB3, FN1	1770	6	16792	6.32467	1	0.60586	29.5451
GO:0019083~viral transcription	73	3.4795	6.22926e-43	RPL18, RPL17, RPL36A, RPL19, RPL14, RPL13, RPL15, RPLP2, RPS2, RPS3, RPS3A, RPLP0, RPLP1, RPL26L1, FAU, RPL10, RPL11, RPL12, RPL35A, RPS4X, RPS18, RPS19, RPS16, RPL41, RPS14, RPS15, RPS12, RPS13, RPS10, RPS11, UBA52, NUP98, NUP160, RPL35, RPL27A, RPS15A, RPL36, RPL37, RPL39, RPS25, RPS27, RPL30, RPS28, POM121, RPS29, RPL32, RPL7, RPL31, RPL34, RPL9, RPL8, RPL5, POM121C, RPS20, NUP54, RPL7A, RPL4,…	1770	112	16792	6.18349	3.05047e-39	1.01682e-39	1.18287e-39
GO:0000184~nuclear-transcribed mRNA catabolic process, nonsense-mediated decay	75	3.57483	1.34417e-42	RPL18, RPL17, RPL36A, RPL19, RPL14, RPL13, RPL15, RPLP2, RPS2, RPS3, RPS3A, RPLP0, RPLP1, RPL26L1, FAU, RPL10, RPL11, RPL12, RPL35A, RPS4X, RPS18, RPS19, RPS16, RPL41, RPS14, RPS15, RPS12, RPS13, RPS10, RPS11, UBA52, PPP2R2A, RPL27A, RPL35, RPS15A, RPL36, RPL37, RPL39, RPS25, RPS27, RPL30, RPS28, RPS29, RPL32, RPL7, RPL31, EIF3E, RPL9, RPL34, RPL8, RPL5, RPS20, RPL4, RPL7A, PABPC1, RPS21, RPS23, …	1770	119	16792	5.97921	6.58241e-39	1.6456e-39	2.55243e-39
GO:0006413~translational initiation	86	4.09914	1.16223e-48	ABCF1, RPL18, RPL17, RPL36A, RPL19, RPL14, RPL13, EIF5, RPL15, RPLP2, EIF2A, RPS2, LARP1, RPS3, RPS3A, RPLP0, RPLP1, RPL26L1, FAU, RPL10, EIF1, RPL11, RPL12, RPL35A, EIF1B, RPS4X, RPS18, RPS19, RPS16, RPL41, RPS14, EIF2S1, RPS15, EIF2S2, RPS12, RPS13, RPS10, RPS11, UBA52, RPL27A, RPL35, RPS15A, RPL36, RPL37, RPL39, RPS25, EIF3D, RPS27, RPL30, RPS28, EIF3B, RPS29, EIF3G, RPL7, RPL32, EIF3H, RPL31,…	1770	137	16792	5.95535	5.69146e-45	5.69146e-45	2.20695e-45
GO:0000447~endonucleolytic cleavage in ITS1 to separate SSU-rRNA from 5.8S rRNA and LSU-rRNA from tricistronic rRNA transcript (SSU-rRNA, 5.8S rRNA, LSU-rRNA)	5	0.238322	0.00606141	RCL1, RPSA, RRS1, RPS21, UTP20	1770	8	16792	5.92938	1	0.4015	10.9035
GO:1904871~positive regulation of protein localization to Cajal body	5	0.238322	0.00606141	TCP1, CCT4, CCT8, CCT3, CCT6A	1770	8	16792	5.92938	1	0.4015	10.9035
GO:0035356~cellular triglyceride homeostasis	4	0.190658	0.029499	XBP1, FITM2, SIRT1, NR1H4	1770	7	16792	5.42115	1	0.72369	43.3672
GO:0002639~positive regulation of immunoglobulin production	4	0.190658	0.029499	XBP1, CLCF1, IL4R, FOXP1	1770	7	16792	5.42115	1	0.72369	43.3672
GO:0075522~IRES-dependent viral translational initiation	4	0.190658	0.029499	EIF3D, EIF3B, EIF3F, PTBP1	1770	7	16792	5.42115	1	0.72369	43.3672
GO:0006595~polyamine metabolic process	4	0.190658	0.029499	ODC1, OAZ1, AMD1, SMS	1770	7	16792	5.42115	1	0.72369	43.3672
GO:0051683~establishment of Golgi localization	4	0.190658	0.029499	ARHGAP21, CDC42, YWHAZ, PDCD10	1770	7	16792	5.42115	1	0.72369	43.3672
GO:0045719~negative regulation of glycogen biosynthetic process	4	0.190658	0.029499	GRB10, INPP5K, GSK3B, SELENOS	1770	7	16792	5.42115	1	0.72369	43.3672
GO:0060501~positive regulation of epithelial cell proliferation involved in lung morphogenesis	4	0.190658	0.029499	WNT2, CDC42, FGF7, HMGA2	1770	7	16792	5.42115	1	0.72369	43.3672
GO:0090050~positive regulation of cell migration involved in sprouting angiogenesis	4	0.190658	0.029499	PTGS2, VEGFA, HDAC9, CIB1	1770	7	16792	5.42115	1	0.72369	43.3672
GO:0042274~ribosomal small subunit biogenesis	9	0.42898	8.82809e-05	RPS28, RPS19, NOM1, RPS16, EMG1, RPS15, RPS6, RPS7, RPS24	1770	16	16792	5.33644	0.351005	0.0237322	0.167502
GO:0000463~maturation of LSU-rRNA from tricistronic rRNA transcript (SSU-rRNA, 5.8S rRNA, LSU-rRNA)	5	0.238322	0.0100072	GTPBP4, RPL7, RPL7L1, RPL35, RPF2	1770	9	16792	5.27056	1	0.495433	17.3852
GO:0048333~mesodermal cell differentiation	6	0.285987	0.00345542	ITGA8, ITGA3, ITGB3, HMGA2, ITGB1, KDM6B	1770	11	16792	5.17473	1	0.297518	6.36146
GO:0000028~ribosomal small subunit assembly	10	0.476644	5.40575e-05	RPSA, RPS27, RPS28, RPS19, RPS10-NUDT3, RPS14, RPS15, RPS10, RPS27L, RPS5	1770	19	16792	4.99316	0.232584	0.0174936	0.102599
GO:0030853~negative regulation of granulocyte differentiation	4	0.190658	0.0435616	ZBTB46, CUL4A, RARA, RUNX1	1770	8	16792	4.7435	1	0.80123	57.0762
GO:0046903~secretion	4	0.190658	0.0435616	CA9, PRKCI, CA2, TPD52	1770	8	16792	4.7435	1	0.80123	57.0762
GO:1903071~positive regulation of ER-associated ubiquitin-dependent protein catabolic process	4	0.190658	0.0435616	CAV1, HERPUD1, XBP1, UBQLN1	1770	8	16792	4.7435	1	0.80123	57.0762
GO:0032688~negative regulation of interferon-beta production	4	0.190658	0.0435616	TRAF3IP1, REL, RELB, PYCARD	1770	8	16792	4.7435	1	0.80123	57.0762
GO:1902237~positive regulation of endoplasmic reticulum stress-induced intrinsic apoptotic signaling pathway	5	0.238322	0.0153033	SERINC3, BOK, BBC3, SIRT1, DDIT3	1770	10	16792	4.7435	1	0.580228	25.3858
GO:0036499~PERK-mediated unfolded protein response	6	0.285987	0.00541365	ATF4, HERPUD1, EIF2S1, CXCL8, ASNS, DDIT3	1770	12	16792	4.7435	1	0.383268	9.79437
GO:0042273~ribosomal large subunit biogenesis	12	0.571973	1.88397e-05	WDR74, ZNF622, RPL35A, RPL14, RPL7, NOP16, RPL26, RPL26L1, NLE1, RRS1, RPL5, RPL11	1770	25	16792	4.55376	0.0881309	0.0083521	0.0357684
GO:0001731~formation of translation preinitiation complex	11	0.524309	5.15896e-05	EIF4B, EIF3D, EIF3B, EIF3G, EIF3H, EIF4H, EIF3E, EIF5, EIF3F, EIF3L, EIF3M	1770	23	16792	4.53726	0.223253	0.0192463	0.0979174
GO:0000027~ribosomal large subunit assembly	10	0.476644	0.0001414	BRIX1, NLE1, RPL10, RPL5, RPL24, RPL11, RSL24D1, RPL12, RPF2, MDN1	1770	21	16792	4.51762	0.499669	0.0340317	0.268161
GO:0060389~pathway-restricted SMAD protein phosphorylation	6	0.285987	0.0080422	BMP2, SMAD7, GDF6, TGFBR3, USP15, ACVR1	1770	13	16792	4.37862	1	0.460893	14.2153
GO:0061621~canonical glycolysis	12	0.571973	2.95529e-05	ALDOA, PKM, GPI, TPI1, PFKFB4, ENO2, PGAM1, PFKP, HK2, PGK1, GAPDH, ENO1	1770	26	16792	4.37862	0.134738	0.0119878	0.0561028
GO:0006048~UDP-N-acetylglucosamine biosynthetic process	5	0.238322	0.0220736	AMDHD2, UAP1, GNPDA1, GFPT2, UAP1L1	1770	11	16792	4.31228	1	0.646899	34.5477
GO:0006364~rRNA processing	93	4.43279	5.7569e-35	RPL18, RPL17, RPL36A, RPL19, RPL14, RPL13, RPL15, RPLP2, RPS27L, RPS2, ISG20, RPS3, WDR75, RPS3A, RPLP0, RPLP1, RPL26L1, FAU, RPL10, DDX21, RPL11, RPL12, IMP4, MDN1, RPL35A, RPP21, EXOSC7, EMG1, EXOSC5, RPS4X, RCL1, RPS18, RPS19, PIH1D1, RPS16, RPL41, RIOK3, RPS14, RPS15, RPS12, RPS13, RPS10, RPS11, UBA52, WDR46, UTP3, UTP4, UTP6, RPL27A, RPL35, RPS15A, RPL36, RPL37, WBP11, RIOK1, RPL39, RPS25, R…	1770	214	16792	4.12286	2.81915e-31	5.63831e-32	1.09317e-31
GO:0031929~TOR signaling	6	0.285987	0.0114398	EIF4EBP1, FLCN, RPS6, RPTOR, FNIP1, LARP1	1770	14	16792	4.06586	1	0.518928	19.6262
GO:0030728~ovulation	5	0.238322	0.0304035	TNFAIP6, PTGS2, EREG, IL4R, MYC	1770	12	16792	3.95292	1	0.731459	44.3611
GO:0045744~negative regulation of G-protein coupled receptor protein signaling pathway	5	0.238322	0.0304035	RGS2, RGS4, CXCL8, CCL5, KLK14	1770	12	16792	3.95292	1	0.731459	44.3611
GO:0034329~cell junction assembly	5	0.238322	0.0304035	ILK, FBLIM1, VMP1, FLNC, VASP	1770	12	16792	3.95292	1	0.731459	44.3611
GO:0060394~negative regulation of pathway-restricted SMAD protein phosphorylation	5	0.238322	0.0304035	DKK1, SMAD7, XBP1, SNX25, ENG	1770	12	16792	3.95292	1	0.731459	44.3611
GO:1990440~positive regulation of transcription from RNA polymerase II promoter in response to endoplasmic reticulum stress	5	0.238322	0.0304035	ATF4, CEBPB, XBP1, CREB3L1, DDIT3	1770	12	16792	3.95292	1	0.731459	44.3611
GO:0000002~mitochondrial genome maintenance	5	0.238322	0.0304035	LONP1, SLC25A36, MRPL17, MRPL39, AKT3	1770	12	16792	3.95292	1	0.731459	44.3611
GO:1904874~positive regulation of telomerase RNA localization to Cajal body	6	0.285987	0.0156964	TCP1, CCT4, CCT8, CCT3, CCT6A, NOP10	1770	15	16792	3.7948	1	0.581261	25.9494
GO:0006412~translation	100	4.76644	2.09767e-33	RPL18, RPL17, RPL36A, RPL19, RPL14, RPL13, RPL15, RPLP2, RPS27L, SLC25A21, IGHMBP2, RPLP0, SLC25A23, RPLP1, RPL26L1, FAU, RPL10, RPL11, RPL12, SLC25A26, RPL36AL, RPL35A, MRPL51, DARS, RSL1D1, RPS18, RPS19, MRPS18C, RPS16, SLC25A34, SLC25A36, RPS14, RPS15, RPS12, SLC25A38, RPS13, RPS10, PELO, RPS11, UBA52, MRPS12, PABPC4, RPS25, RPS27, RPS28, RPL7, RPS29, RPL9, RPL8, RPL5, RPL7A, RPL4, RPS20, RPS2…	1770	253	16792	3.7498	1.02723e-29	1.71205e-30	3.98323e-30
GO:0070059~intrinsic apoptotic signaling pathway in response to endoplasmic reticulum stress	13	0.619638	7.69412e-05	CEBPB, CHAC1, TRIB3, ITPR1, DDIT3, ATF4, BAG6, ERO1A, BBC3, XBP1, UBE2K, GSK3B, PPP1R15A	1770	33	16792	3.73731	0.313944	0.0232746	0.146002
GO:0042267~natural killer cell mediated cytotoxicity	7	0.333651	0.00823279	TUBB, MICA, CEBPG, ULBP1, ULBP2, RAET1L, TUBB4B	1770	18	16792	3.68939	1	0.463567	14.5278
GO:0045197~establishment or maintenance of epithelial cell apical/basal polarity	5	0.238322	0.0403419	ARF4, ILK, PRKCI, MTCL1, MARK2	1770	13	16792	3.64885	1	0.793073	54.2477
GO:0042994~cytoplasmic sequestering of transcription factor	5	0.238322	0.0403419	CREB3, NFKBIE, PKD1, NFKBIA, MXI1	1770	13	16792	3.64885	1	0.793073	54.2477
GO:0000462~maturation of SSU-rRNA from tricistronic rRNA transcript (SSU-rRNA, 5.8S rRNA, LSU-rRNA)	12	0.571973	0.000271656	UTP3, RPS19, RPS16, EMG1, RPS14, UTP6, NGDN, UTP20, RPS8, CCDC59, WDR46, RPS24	1770	32	16792	3.55763	0.73565	0.0539281	0.514586
GO:0006446~regulation of translational initiation	13	0.619638	0.000201047	EIF4B, EIF3D, EIF3B, EIF3G, EIF3H, EIF4H, EIF3E, EIF5, EIF3F, EIF3L, EIF1, EIF1B, EIF3M	1770	36	16792	3.42586	0.626421	0.0458047	0.381076
GO:1901216~positive regulation of neuron death	6	0.285987	0.0270879	PICALM, EIF2S1, GSK3B, ABL1, DAXX, DDIT4	1770	17	16792	3.34835	1	0.708802	40.6349
GO:0030224~monocyte differentiation	6	0.285987	0.0270879	PDE1B, VEGFA, MYH9, MT1G, CSF1R, IL31RA	1770	17	16792	3.34835	1	0.708802	40.6349
GO:0006096~glycolytic process	12	0.571973	0.000494047	ALDOA, GPI, LDHA, TPI1, PGAM4, ENO2, PGAM1, HK2, PGK1, GAPDH, EDARADD, ENO1	1770	34	16792	3.34835	0.911074	0.0857284	0.933983
GO:0030225~macrophage differentiation	6	0.285987	0.0343398	CEBPA, CDC42, VEGFA, SIRT1, CSF1R, IL31RA	1770	18	16792	3.16234	1	0.759726	48.4972
GO:2000249~regulation of actin cytoskeleton reorganization	6	0.285987	0.0343398	ABL1, ABL2, CD2AP, DAPK3, ARHGDIA, CSF1R	1770	18	16792	3.16234	1	0.759726	48.4972
GO:0006414~translational elongation	6	0.285987	0.0343398	GTPBP2, EEF1A1, RPLP1, EEF1G, RPLP2, EEF2	1770	18	16792	3.16234	1	0.759726	48.4972
GO:0031293~membrane protein intracellular domain proteolysis	6	0.285987	0.0343398	RELA, SPPL2B, ADAM17, NFKB1, NGFR, TRAF6	1770	18	16792	3.16234	1	0.759726	48.4972
GO:0034142~toll-like receptor 4 signaling pathway	6	0.285987	0.0343398	IRAK1, LY96, TIRAP, NFKBIA, CD14, NR1H4	1770	18	16792	3.16234	1	0.759726	48.4972
GO:0051894~positive regulation of focal adhesion assembly	7	0.333651	0.0182912	TSC1, ITGB1BP1, VEGFA, TEK, S100A10, SDC4, IQGAP1	1770	21	16792	3.16234	1	0.60246	29.5696
GO:0032008~positive regulation of TOR signaling	9	0.42898	0.00529347	LAMTOR5, LAMTOR3, XBP1, SEC13, RRAGD, FLCN, RPTOR, RRAGB, RRAGC	1770	27	16792	3.16234	1	0.382029	9.58717
GO:0055007~cardiac muscle cell differentiation	9	0.42898	0.00529347	NOX4, BMP2, TSC1, CACYBP, SIK1, ITGB1, KDM6B, FOXP1, SLC9A1	1770	27	16792	3.16234	1	0.382029	9.58717
GO:0042254~ribosome biogenesis	12	0.571973	0.000851278	RCL1, RPS18, RPS28, RRN3, RPLP0, RPL34, LSG1, DDX31, RSL24D1, NOA1, RPL7A, GNL3	1770	36	16792	3.16234	0.984555	0.133948	1.60416
GO:0061418~regulation of transcription from RNA polymerase II promoter in response to hypoxia	9	0.42898	0.00673864	BACH1, UBE2D3, EP300, CA9, EPAS1, VEGFA, EGLN3, EGLN1, UBA52	1770	28	16792	3.04939	1	0.424114	12.0492
GO:0070423~nucleotide-binding oligomerization domain containing signaling pathway	8	0.381316	0.0124147	MAP3K7, IRAK2, IRAK1, CYLD, ITCH, TRAF6, TNFAIP3, UBA52	1770	25	16792	3.03584	1	0.534522	21.1179
GO:0002040~sprouting angiogenesis	8	0.381316	0.0124147	CDC42, NRP1, PGF, JMJD6, OTULIN, TEK, LOXL2, ENG	1770	25	16792	3.03584	1	0.534522	21.1179
GO:0010506~regulation of autophagy	16	0.762631	0.000129627	NLRP6, RRAGD, DAPK3, RRAGB, ITPR1, RRAGC, EP300, XBP1, BOK, PYCARD, MTCL1, VMP1, PIP4K2A, ABL1, DRAM1, ABL2	1770	50	16792	3.03584	0.469971	0.0328598	0.24586
GO:0008156~negative regulation of DNA replication	6	0.285987	0.0426832	GTPBP4, TSPYL2, PDS5A, CDAN1, HUS1, S100A11	1770	19	16792	2.9959	1	0.796912	56.3214
GO:0045926~negative regulation of growth	6	0.285987	0.0426832	MT1L, BBC3, PTK6, MT2A, MT1G, IGFBP5	1770	19	16792	2.9959	1	0.796912	56.3214
GO:1990138~neuron projection extension	6	0.285987	0.0426832	FLRT3, NDEL1, PLXNA1, NRN1L, NRN1, IQGAP1	1770	19	16792	2.9959	1	0.796912	56.3214
GO:0030220~platelet formation	6	0.285987	0.0426832	EP300, ACTN1, WDR1, MYH9, SRF, CIB1	1770	19	16792	2.9959	1	0.796912	56.3214
GO:0006865~amino acid transport	11	0.524309	0.00254533	SLC38A5, SLC1A4, SLC1A5, SLC36A2, SLC38A2, SLC7A1, SLC6A6, SLC7A9, SLC38A1, SLC7A5, MYC	1770	35	16792	2.98163	0.999996	0.251916	4.72421
GO:0042149~cellular response to glucose starvation	9	0.42898	0.00846311	ATF4, TBL2, XBP1, SH3GLB1, ATG14, SLC2A1, UPP1, ZC3H12A, ASNS	1770	29	16792	2.94424	1	0.462699	14.9039
GO:2001238~positive regulation of extrinsic apoptotic signaling pathway	8	0.381316	0.015479	BCL10, CYLD, CAV1, TNFRSF12A, PYCARD, GPER1, ITM2C, DEDD2	1770	26	16792	2.91908	1	0.580254	25.6381
GO:0033137~negative regulation of peptidyl-serine phosphorylation	7	0.333651	0.0283755	RACK1, CAV1, DKK1, INPP5K, SMAD7, PAQR3, DDIT4	1770	23	16792	2.88735	1	0.715952	42.1092
GO:0016239~positive regulation of macroautophagy	7	0.333651	0.0283755	SQSTM1, BNIP3L, BNIP3, WAC, SESN2, SIRT1, LARP1	1770	23	16792	2.88735	1	0.715952	42.1092
GO:0010803~regulation of tumor necrosis factor-mediated signaling pathway	9	0.42898	0.0104975	RACK1, CYLD, OTULIN, SPHK1, PYCARD, BIRC3, TNFAIP3, UBA52, TAX1BP1	1770	30	16792	2.8461	1	0.497942	18.1588
GO:0006418~tRNA aminoacylation for protein translation	12	0.571973	0.00220805	IARS, TARS, CARS, YARS, DARS, SARS, AARS, GARS, EPRS, MRPL39, SARS2, KARS	1770	40	16792	2.8461	0.99998	0.237093	4.1106
GO:0071230~cellular response to amino acid stimulus	14	0.667302	0.000852819	LAMTOR5, LAMTOR3, CEBPB, CPEB1, BCL2L1, SESN2, CAPN2, RRAGD, RRAGB, RPTOR, RRAGC, SH3BP4, XBP1, PDGFC	1770	47	16792	2.82592	0.984671	0.130005	1.60705
GO:0006094~gluconeogenesis	13	0.619638	0.00152758	ALDOA, CRTC2, PGAM1, PCK2, GPI, ATF4, TPI1, PGAM4, ENO2, PER2, PGK1, GAPDH, ENO1	1770	44	16792	2.80298	0.999439	0.192565	2.86119
GO:0030511~positive regulation of transforming growth factor beta receptor signaling pathway	7	0.333651	0.0345633	HSP90AB1, ITGA8, ADAM17, TGFBR3, TGFB1I1, FLCN, CITED2	1770	24	16792	2.76704	1	0.759145	48.723
GO:0042771~intrinsic apoptotic signaling pathway in response to DNA damage by p53 class mediator	9	0.42898	0.0128722	BAG6, EP300, NUPR1, PYCARD, TP63, RPS27L, TOPORS, SIRT1, DDIT4	1770	31	16792	2.75429	1	0.538703	21.809
GO:0033572~transferrin transport	10	0.476644	0.00874881	ATP6V1C1, ATP6V0E1, TFRC, TFR2, ATP6V1E1, LMTK2, ATP6V1B2, ATP6V1G1, ATP6V0D2, ATP6V1D	1770	35	16792	2.71057	1	0.468905	15.3683
GO:0034198~cellular response to amino acid starvation	7	0.333651	0.0415576	ATF4, SLC38A2, SH3GLB1, EIF2S1, NPRL3, RRAGB, RRAGC	1770	25	16792	2.65636	1	0.797881	55.3358
GO:0007159~leukocyte cell-cell adhesion	7	0.333651	0.0415576	ICAM1, ITGA5, MSN, CCL5, NT5E, TNIP1, ITGB1	1770	25	16792	2.65636	1	0.797881	55.3358
GO:0016236~macroautophagy	21	1.00095	8.35863e-05	LAMTOR5, ATG10, LAMTOR3, ATG12, ATG14, ATG13, PRKAB2, RRAGD, UBQLN1, RPTOR, RRAGB, VDAC1, RRAGC, MFN1, C6ORF106, TOMM6, MAP1LC3B, TOMM5, SQSTM1, TOMM20, UBA52	1770	76	16792	2.62141	0.335911	0.0237912	0.158602
GO:0097421~liver regeneration	8	0.381316	0.0278174	SRSF5, RPL19, CEBPB, RPS16, RPL32, NFKBIA, MYC, RPS24	1770	29	16792	2.61711	1	0.715189	41.4744
GO:0048662~negative regulation of smooth muscle cell proliferation	8	0.381316	0.0278174	ANG, ILK, NPR3, TNFAIP3, IGFBP3, KLF4, TRIB1, IGFBP5	1770	29	16792	2.61711	1	0.715189	41.4744
GO:0045214~sarcomere organization	8	0.381316	0.0278174	OBSCN, KRT19, CFL2, WDR1, TPM1, SRF, ITGB1, FOXP1	1770	29	16792	2.61711	1	0.715189	41.4744
GO:0010508~positive regulation of autophagy	11	0.524309	0.00722733	SH3BP4, MTDH, PLK2, MEFV, XBP1, SH3GLB1, ATG14, BNIP3, ZC3H12A, PIM2, FLCN	1770	40	16792	2.60893	1	0.441392	12.8672
GO:0010827~regulation of glucose transport	9	0.42898	0.0187619	GCKR, NUP98, POM121, FFAR4, NUP160, TRIB3, POM121C, NUP54, NUP58	1770	33	16792	2.58737	1	0.608146	30.2081
GO:0002931~response to ischemia	9	0.42898	0.0187619	EIF4EBP1, CAV1, NOL3, SLC26A5, UCHL1, PER2, HK2, EEF2, CIB1	1770	33	16792	2.58737	1	0.608146	30.2081
GO:0002755~MyD88-dependent toll-like receptor signaling pathway	9	0.42898	0.0187619	MAP3K7, IRAK2, IRAK1, LY96, TIRAP, TRAF6, TNIP1, UBA52, CD14	1770	33	16792	2.58737	1	0.608146	30.2081
GO:0006361~transcription initiation from RNA polymerase I promoter	9	0.42898	0.0187619	POLR2H, CD3EAP, TAF1A, RRN3, TAF1D, POLR1C, ZNRD1, CDK7, TWISTNB	1770	33	16792	2.58737	1	0.608146	30.2081
GO:1903146~regulation of mitophagy	9	0.42898	0.0187619	CSNK2A2, WDR75, MAP1LC3B, BNIP3L, U2AF1, USP36, POLR3A, WBP11, VDAC1	1770	33	16792	2.58737	1	0.608146	30.2081
GO:0033138~positive regulation of peptidyl-serine phosphorylation	19	0.905624	0.00025519	UCN, CAV1, PDCD10, HCLS1, AKAP9, TERF2IP, LATS1, RPTOR, FNIP1, IL11, CAPRIN2, LIF, CDC42, GSK3B, TXN, VEGFA, PPP1R15A, AXIN1, BCAR3	1770	70	16792	2.57504	0.713445	0.0528901	0.483466
GO:0051898~negative regulation of protein kinase B signaling	10	0.476644	0.0127289	RACK1, INPP5K, DRD2, GPER1, FLCN, RAPGEF1, SIRT1, KLF4, DDIT3, CIB1	1770	37	16792	2.56406	1	0.539061	21.5932
GO:0002053~positive regulation of mesenchymal cell proliferation	7	0.333651	0.0493811	WNT2, FGFR1, VEGFA, TP63, SOX9, MYC, FOXP1	1770	26	16792	2.55419	1	0.825606	61.7733
GO:0006904~vesicle docking involved in exocytosis	7	0.333651	0.0493811	VPS18, RAB8B, KCNB1, STXBP1, STXBP2, SYTL2, YKT6	1770	26	16792	2.55419	1	0.825606	61.7733
GO:1900740~positive regulation of protein insertion into mitochondrial membrane involved in apoptotic signaling pathway	8	0.381316	0.0330886	NMT1, YWHAZ, YWHAG, SH3GLB1, BBC3, PPP3R1, PPP3CC, TP63	1770	30	16792	2.52987	1	0.752516	47.2152
GO:0006362~transcription elongation from RNA polymerase I promoter	8	0.381316	0.0330886	POLR2H, CD3EAP, TAF1A, TAF1D, POLR1C, ZNRD1, CDK7, TWISTNB	1770	30	16792	2.52987	1	0.752516	47.2152
GO:0090004~positive regulation of establishment of protein localization to plasma membrane	8	0.381316	0.0330886	PDPK1, STX4, PRKCI, ARF6, ITGA3, GPER1, ITGB1, CIB1	1770	30	16792	2.52987	1	0.752516	47.2152
GO:0045773~positive regulation of axon extension	8	0.381316	0.0330886	ANAPC2, NDEL1, TNFRSF12A, GSK3B, ILK, GOLGA4, SRF, FN1	1770	30	16792	2.52987	1	0.752516	47.2152
GO:0034976~response to endoplasmic reticulum stress	20	0.953289	0.000214601	CREBRF, HERPUD1, CEBPB, CREB3, CXCL8, TRIB3, EEF2, ANKS4B, UBQLN1, DDIT3, ATF4, ERO1A, UFM1, BBC3, XBP1, COL4A3BP, EIF2S1, ABL1, FAM129A, PPP1R15A	1770	75	16792	2.52987	0.650417	0.0466501	0.406717
GO:0098609~cell-cell adhesion	72	3.43184	1.93624e-13	CAST, HSP90AB1, LDHA, RPL14, EIF5, RPL15, EIF2A, RPS2, IQGAP1, LARP1, PKM, PICALM, PCBP1, SND1, BAG3, FAM129B, LRRFIP1, GOLGA3, STX5, RAN, PFKP, OLA1, MPP7, EEF2, VASP, MARK2, RSL1D1, STXBP6, SCYL1, EEF1G, RAB10, UBAP2, ALDOA, YWHAZ, PPME1, CALD1, KLC2, ESYT2, TAGLN2, GPRC5A, RACK1, ATXN2L, SH3GLB1, RPL34, EIF3E, FASN, CNN2, NDRG1, RPL7A, EHD1, EMD, NUDC, ENO1, FLRT3, ZC3H15, MYO1B, TRIM29, S100A…	1770	271	16792	2.52053	9.48171e-10	1.35453e-10	3.67673e-10
GO:0006363~termination of RNA polymerase I transcription	8	0.381316	0.0389851	POLR2H, CD3EAP, TAF1A, TAF1D, POLR1C, ZNRD1, CDK7, TWISTNB	1770	31	16792	2.44826	1	0.786791	53.0036
GO:0071902~positive regulation of protein serine/threonine kinase activity	9	0.42898	0.0263588	HSP90AB1, ALS2, ACSL1, PIH1D1, PDCD10, MAP2K1, RPTOR, CSF1R, CIB1	1770	35	16792	2.43952	1	0.702164	39.7844
GO:0031663~lipopolysaccharide-mediated signaling pathway	8	0.381316	0.045528	IRAK2, IRAK1, MTDH, LY96, NFKBIA, PTPN22, CCL5, CD14	1770	32	16792	2.37175	1	0.810921	58.7214
GO:0006409~tRNA export from nucleus	8	0.381316	0.045528	XPOT, NUP98, POM121, NUP160, RAN, POM121C, NUP54, NUP58	1770	32	16792	2.37175	1	0.810921	58.7214
GO:0043124~negative regulation of I-kappaB kinase/NF-kappaB signaling	10	0.476644	0.0210202	NLRP6, NFKBID, IL1RL1, PYCARD, ZC3H12A, ABL1, TNFAIP3, TNIP1, SIRT1, NR1H4	1770	40	16792	2.37175	1	0.643005	33.1959
GO:0007346~regulation of mitotic cell cycle	10	0.476644	0.0210202	CYLD, CKS2, DYNLT3, PIM3, PIM2, SIK1, SIRT1, DAPK3, MYC, NEK7	1770	40	16792	2.37175	1	0.643005	33.1959
GO:0043627~response to estrogen	16	0.762631	0.00262927	CAV1, LDHA, STAR, CRIPAK, PTPRN, GAL, CITED4, CITED2, ARPC1B, KRT19, EP300, IL4R, TEK, RGS9, CA2, IGFBP2	1770	65	16792	2.33526	0.999997	0.253986	4.87636
GO:0030968~endoplasmic reticulum unfolded protein response	11	0.524309	0.0167839	TBL2, ERO1A, STC2, XBP1, AARS, CREB3L1, CREB3L4, SELENOS, YOD1, EDEM1, PPP1R15A	1770	45	16792	2.31905	1	0.585958	27.4875
GO:1900034~regulation of cellular response to heat	18	0.85796	0.00173685	PTGES3, HSP90AB1, NUP98, NUP160, FKBP4, SIRT1, RPTOR, BAG5, HSPH1, POM121, EP300, GSK3B, BAG3, CAMK2B, POM121C, NUP54, CHORDC1, NUP58	1770	75	16792	2.27688	0.999799	0.210587	3.24707
GO:0071456~cellular response to hypoxia	23	1.09628	0.000336077	ICAM1, IRAK1, TBL2, STC2, EPAS1, PTGS2, BNIP3, CPEB1, NPEPPS, UBQLN1, SIRT1, SLC29A1, EIF4EBP1, ERO1A, BBC3, GNB1, BNIP3L, VEGFA, FAM162A, NDRG1, STC1, SLC9A1, TWIST1	1770	96	16792	2.27293	0.807189	0.061347	0.636246
GO:0001666~response to hypoxia	41	1.95424	1.06976e-06	PAM, CAV1, LDHA, DRD2, PGF, EGLN3, BNIP3, EGLN1, KCNA5, XRCC1, TRH, SRF, CITED2, PKM, EDNRA, LONP1, PLOD1, CXCR4, ANG, PLOD2, TEK, LOXL2, DPP4, ANGPTL4, NOX4, BMP2, NOL3, EPAS1, CAPN2, ITPR1, DDIT4, EP300, CA9, ADM, ETS1, VEGFA, NPPC, TGFBR3, ADAM17, ENG, ALKBH5	1770	172	16792	2.26144	0.00522494	0.000523726	0.00203134
GO:0009725~response to hormone	10	0.476644	0.028352	MMS19, LONP1, GCLC, ANG, HCLS1, NCOA6, MMP19, FHL2, SRF, TIMP1	1770	42	16792	2.25881	1	0.718855	42.0826
GO:0071407~cellular response to organic cyclic compound	14	0.667302	0.00744226	KLF5, CEBPA, HSP90AB1, BMP2, CEBPB, SMAD5, NFKBIA, CCL5, MBD2, TMF1, SLC16A1, ARHGDIA, IGFBP5, AXIN1	1770	59	16792	2.25115	1	0.445682	13.2247
GO:0032720~negative regulation of tumor necrosis factor production	9	0.42898	0.0413844	AXL, ZC3H12A, PTPN22, RARA, SELENOS, AKAP8, GPNMB, TNFAIP3, TWIST1	1770	38	16792	2.24692	1	0.798997	55.1823
GO:2001237~negative regulation of extrinsic apoptotic signaling pathway	9	0.42898	0.0413844	CFLAR, SH3RF1, NRP1, GCLC, NOL3, LGALS3, RELA, SIAH2, ACVR1	1770	38	16792	2.24692	1	0.798997	55.1823
GO:0070936~protein K48-linked ubiquitination	11	0.524309	0.0224809	TRIM38, RNF126, UBE2D3, UBE2K, ITCH, TOPORS, ZNRF1, TNFAIP3, UBE2B, UBE2E2, UBE2R2	1770	47	16792	2.22036	1	0.650211	35.0634
GO:0006928~movement of cell or subcellular component	20	0.953289	0.00132747	TLN1, PTGS2, MAP2K1, CALD1, VIM, CXCL8, ARF6, TPM1, TPM4, TPM3, PLAUR, ACTR3, ARPC1B, TUBB, LTB4R, ARPC2, TXN, MSN, ARHGDIA, TUBB4B	1770	86	16792	2.20628	0.998504	0.18395	2.49085
GO:0000079~regulation of cyclin-dependent protein serine/threonine kinase activity	9	0.42898	0.0474406	GTPBP4, CDKN2D, CCNT1, CNPPD1, BCCIP, CDK7, CCNG1, SERTAD1, CDC37	1770	39	16792	2.18931	1	0.819547	60.264
GO:0006605~protein targeting	9	0.42898	0.0474406	YWHAZ, YWHAG, MYO1C, AKAP12, TOMM20, RPL11, CDC37, SEC61G, RAB27A	1770	39	16792	2.18931	1	0.819547	60.264
GO:0001933~negative regulation of protein phosphorylation	14	0.667302	0.00991027	PARD6A, ATG14, BDKRB1, PAQR3, MYADM, CORO1C, TRAF3IP1, INPP5K, RABGEF1, ZC3H12A, PPP1R15B, FAM129A, IGFBP3, CIB1	1770	61	16792	2.17735	1	0.496886	17.2316
GO:0016241~regulation of macroautophagy	10	0.476644	0.0373112	ATP6V1C1, ATP6V0E1, SH3GLB1, ATP6V1E1, UCHL1, ATP6V1B2, ATP6V1G1, ATP6V0D2, GAPDH, ATP6V1D	1770	44	16792	2.15614	1	0.779948	51.4246
GO:0010977~negative regulation of neuron projection development	10	0.476644	0.0373112	BAG5, FKBP4, GSK3B, VIM, NGFR, DGUOK, PRKCSH, PAQR3, ITM2C, CIB1	1770	44	16792	2.15614	1	0.779948	51.4246
GO:0043086~negative regulation of catalytic activity	17	0.810296	0.00445566	PPME1, CABP1, RNH1, TMBIM1, ANXA5, ANXA4, ANXA3, ANXA2, ANXA2P2, TIMP1, ATP7A, OAZ1, PPP1R2, SLN, LMTK2, FAF2, PPP1R14B	1770	75	16792	2.15039	1	0.343308	8.13013
GO:0032088~negative regulation of NF-kappaB transcription factor activity	16	0.762631	0.00636088	IRAK2, IRAK1, NFKBID, OTULIN, NFKBIA, ANXA4, SIRT1, TAX1BP1, CYLD, BRMS1, PYCARD, ZC3H12A, ITCH, TNFAIP3, KLF4, NR1H4	1770	71	16792	2.13792	1	0.411183	11.4118
GO:0046718~viral entry into host cell	18	0.85796	0.00358374	ICAM1, RPSA, VPS18, SLC52A1, AXL, CDHR3, ANPEP, NECTIN4, ITGB3, ITGB1, SLC1A5, NPC1, TFRC, ITGA5, ACE2, ITCH, CLEC5A, DPP4	1770	80	16792	2.13458	1	0.301485	6.59016
GO:0051259~protein oligomerization	13	0.619638	0.0162792	IRAK1, BCL10, CAV2, P2RX7, NOL3, BOK, SH3GLB1, UPK1A, TEK, NPM1, ZC3H12A, TNFAIP3, SLC9A1	1770	58	16792	2.1264	1	0.586561	26.7775
GO:0032147~activation of protein kinase activity	10	0.476644	0.0424431	DRD2, VEGFA, RPLP1, ITGB3, TRAF6, PRKCD, PPP2R3C, RPTOR, AXIN1, MARK2	1770	45	16792	2.10822	1	0.802348	56.1129
GO:0030512~negative regulation of transforming growth factor beta receptor signaling pathway	14	0.667302	0.0147558	CAV2, CAV1, SMAD7, SNX25, SMAD2, SIRT1, PDPK1, XBP1, TGFBR3, ADAM17, BCL9L, TGFB1I1, ENG, UBA52	1770	64	16792	2.07528	1	0.575329	24.594
GO:0010595~positive regulation of endothelial cell migration	10	0.476644	0.0480286	NRP2, NRP1, ETS1, ITGB1BP1, VEGFA, TEK, ZC3H12A, ITGB3, FOXP1, ANXA3	1770	46	16792	2.06239	1	0.819033	60.7272
GO:0001938~positive regulation of endothelial cell proliferation	15	0.714967	0.0117698	NRP2, CAV2, BMP2, HMGB2, NRP1, PGF, ITGB3, SIRT1, RPTOR, CCL26, WNT2, PPP1R16B, ANG, TEK, VEGFA	1770	69	16792	2.06239	1	0.524465	20.1341
GO:0032481~positive regulation of type I interferon production	11	0.524309	0.0378477	POLR2H, IRAK1, EP300, RELA, PTPN22, POLR3A, NFKB1, POLR1C, LRRFIP1, DDX41, CD14	1770	51	16792	2.04622	1	0.779424	51.9361
GO:0030855~epithelial cell differentiation	15	0.714967	0.0133262	RPSA, LGALS3, TOLLIP, EHF, TAGLN2, ANXA4, VDAC1, TCF21, HNRNPH3, PIH1D1, TAGLN, UPK1A, VEGFA, PGK1, DMBT1	1770	70	16792	2.03293	1	0.54685	22.489
GO:0001934~positive regulation of protein phosphorylation	27	1.28694	0.000667554	ATG14, ITGB3, SOX9, FLCN, DAXX, RACK1, SQSTM1, XBP1, TEK, GPNMB, FAM129A, AXIN1, CSF1R, CIB1, DVL3, BMP2, GPER1, SIRT1, FNIP1, ANXA2, DVL1, PLAUR, VEGFA, NPTN, ADAM17, ABL1, ENG	1770	127	16792	2.01692	0.961997	0.110227	1.26003
GO:0071222~cellular response to lipopolysaccharide	24	1.14395	0.00143946	ICAM1, HMGB2, CEBPB, STAR, RELA, AXL, CXCL8, NFKB1, ABCA1, SELENOS, TNFRSF1B, CCL20, XBP1, SERPINE1, PYCARD, ZC3H12A, AICDA, RARA, AKAP8, ABL1, TNFAIP3, TRAF6, CD14, NR1H4	1770	113	16792	2.01494	0.999136	0.192459	2.69827
GO:0071333~cellular response to glucose stimulus	11	0.524309	0.0426042	SLC29A1, NOX4, RACK1, ICAM1, GCLC, STAR, XBP1, KCNB1, GPER1, PCK2, SRF	1770	52	16792	2.00687	1	0.798721	56.2529
GO:0071347~cellular response to interleukin-1	15	0.714967	0.015037	ICAM1, CEBPB, RELA, CXCL8, NFKB1, CCL5, SOX9, CCL26, CCL22, IL17A, CCL13, CCL20, PYCARD, ZC3H12A, MYC	1770	71	16792	2.0043	1	0.577994	25.0017
GO:0070301~cellular response to hydrogen peroxide	12	0.571973	0.0336827	OSER1, ETS1, RELA, AXL, BNIP3, ABL1, TNFAIP3, PRKCD, SIRT1, KLF4, KDM6B, RPS3	1770	57	16792	1.99726	1	0.755848	47.8276
GO:0032922~circadian regulation of gene expression	12	0.571973	0.0336827	ATF4, RAI1, NPAS2, DRD2, RELB, CIART, PER2, BHLHE40, NGFR, KDM5A, SIRT1, AHR	1770	57	16792	1.99726	1	0.755848	47.8276
GO:0032868~response to insulin	14	0.667302	0.0212299	RELA, PTPRN, SESN2, GAL, SIRT1, PKM, RETN, MAX, GRB10, INSIG2, TSC1, ADM, GALP, IGFBP2	1770	67	16792	1.98236	1	0.639482	33.467
GO:0001701~in utero embryonic development	39	1.85891	5.23281e-05	ALS2, FGFR1, ELL, C6, BCL2L1, FLCN, PRKCSH, TPM1, ITGB1, SRF, YBX1, EDNRA, RRN3, INPP5K, SLC30A1, PLOD3, COL4A3BP, PKD1, FOSL1, MYC, TWIST1, MAFG, MAFF, BMP2, MYO1E, SMAD2, MYH9, UBE2B, FOXP1, ATP7A, MGAT1, NMT1, GPI, CUL4A, EIF2S2, VEGFA, SYF2, MAPK8IP3, ACVR1	1770	187	16792	1.97857	0.226057	0.0181376	0.0993184
GO:0017148~negative regulation of translation	12	0.571973	0.0377558	RACK1, TSC1, ANG, CNOT3, EPRS, ILF3, DAPK3, GAPDH, RPS3, CAPRIN2, IGFBP5, FXR1	1770	58	16792	1.96283	1	0.781272	51.8489
GO:0070373~negative regulation of ERK1 and ERK2 cascade	12	0.571973	0.0377558	LIF, NLRP6, DUSP4, SPRY1, XBP1, ITGB1BP1, GPER1, ABL1, FLCN, RAPGEF1, TNIP1, KLF4	1770	58	16792	1.96283	1	0.781272	51.8489
GO:0001889~liver development	15	0.714967	0.0211882	CEBPA, UPF2, JARID2, RELA, CEBPG, ASNS, ARF6, AK4, PRKCSH, CITED2, PKM, XBP1, PKD1, TGFBR3, RARA	1770	74	16792	1.92304	1	0.64234	33.4132
GO:0050728~negative regulation of inflammatory response	16	0.762631	0.0169127	FFAR4, OTULIN, NFKB1, GPER1, SELENOS, PRKCD, TNFAIP6, TNFRSF1B, MEFV, ETS1, TEK, RABGEF1, TNFAIP3, NT5E, KLF4, NR1H4	1770	79	16792	1.92142	1	0.584911	27.6678
GO:0007249~I-kappaB kinase/NF-kappaB signaling	12	0.571973	0.0469069	MAP3K7, IRAK2, BCL10, REL, LY96, SNIP1, RELB, NFKB1, TRAF6, BIRC3, UBA52, CD14	1770	60	16792	1.8974	1	0.818194	59.8391
GO:1903955~positive regulation of protein targeting to mitochondrion	17	0.810296	0.0167663	NKAP, ABLIM3, ATG13, SNIP1, UGCG, POLR3A, WBP11, NPEPPS, CSNK2A2, WDR75, UBE2D3, RAC2, SH3GLB1, U2AF1, USP36, WDR46, PSMD8	1770	86	16792	1.87534	1	0.58948	27.4629
GO:0071260~cellular response to mechanical stimulus	14	0.667302	0.0328857	BCL10, SLC38A2, GCLC, PTGS2, MMP7, BNIP3, NFKB1, SOX9, BAG3, CNN2, FAS, ENG, ARHGDIA, SLC9A1	1770	71	16792	1.87068	1	0.753295	47.0044
GO:0010629~negative regulation of gene expression	27	1.28694	0.00211443	CCR1, PTPN22, NFKB1, FLCN, PTRH2, CNOT7, TMF1, CITED2, RACK1, MAX, CDC42, PICALM, REL, ZC3H12A, ZNF281, UCN, PDCD10, STC2, MAP2K1, ZNF503, SMAD2, GPER1, SIRT1, MYADM, SNX12, ENG, KLF4	1770	137	16792	1.8697	0.999968	0.238733	3.93961
GO:0006936~muscle contraction	21	1.00095	0.00772391	TLN1, TACR2, CALD1, ACTN3, MYL12A, TPM2, TPM1, MYH8, TPM4, MYOT, TPM3, DYSF, LTB4R, SLC6A8, COL4A3BP, CKMT2, GALR2, TMOD3, STBD1, MYOF, EMD	1770	107	16792	1.86194	1	0.452674	13.6911
GO:0051092~positive regulation of NF-kappaB transcription factor activity	26	1.23928	0.00291162	IRAK2, ICAM1, IRAK1, BCL10, CFLAR, ARHGEF2, MTDH, RELA, SPHK1, TIRAP, PRKCI, PRKCH, NFKBIA, NFKB1, TRIM52, TERF2IP, MAP3K7, TRIM38, NLRC4, PSMA6, NPM1, PYCARD, LRRFIP1, TRAF6, UBA52, CIB1	1770	133	16792	1.8546	0.999999	0.271896	5.38642
GO:0032869~cellular response to insulin stimulus	15	0.714967	0.0290594	GCLC, STAR, PRKCI, TRIB3, CPEB1, SELENOS, SRSF5, YWHAG, PDPK1, INPP5K, XBP1, HDAC9, RAB10, MYC, SLC9A1	1770	77	16792	1.84812	1	0.721402	42.878
GO:0007015~actin filament organization	14	0.667302	0.0364054	ALDOA, ARHGEF2, MYO1B, DIAPH2, PRKCI, ACTN1, TMSB10, TPM2, TPM1, TPM4, TPM3, RAC2, ARF1, TMOD3	1770	72	16792	1.8447	1	0.774301	50.5494
GO:0001649~osteoblast differentiation	20	0.953289	0.0117814	IBSP, BMP2, GTPBP4, FHL2, TPM4, FBL, IARS, RSL1D1, MEF2D, SND1, RPS15, FASN, CREB3L1, DDX21, RPS11, HNRNPC, GPNMB, IGFBP3, IGFBP5, TWIST1	1770	104	16792	1.82442	1	0.520318	20.1518
GO:0007219~Notch signaling pathway	22	1.04862	0.00843883	CEBPA, NKAP, BMP2, CHAC1, TP63, KCNA5, SOX9, ANXA4, NOTCH3, KRT19, RPS19, EP300, ITGB1BP1, NLE1, ADAM17, MAML3, ITCH, PERP, RBPJ, MYC, UBA52, NR1H4	1770	115	16792	1.81491	1	0.466765	14.8643
GO:0045766~positive regulation of angiogenesis	22	1.04862	0.00843883	FLT1, MTDH, PGF, C6, SPHK1, CXCL8, SIRT1, ANXA3, CYBB, ADM, BTG1, ETS1, XBP1, TEK, SERPINE1, VEGFA, ZC3H12A, RRAS, RUNX1, ENG, ANGPTL4, TWIST1	1770	115	16792	1.81491	1	0.466765	14.8643
GO:0043066~negative regulation of apoptotic process	87	4.14681	4.6873e-08	SH3RF1, IER3, TP63, BNIP3, NFKB1, ANKLE2, GDNF, CITED2, IL31RA, TMF1, BAG6, RPS3A, BAG3, TPT1, RARA, FAM129B, FAS, ITCH, MYC, CIB1, TWIST1, IRAK1, NOL3, RELA, BCL2A1, PIM1, PRKCI, PIM3, TOPORS, PIM2, HMGA2, UBE2B, PLAUR, TNFRSF10D, VEGFA, THOC6, SIAH2, NGFR, CLEC5A, UBA52, YWHAZ, GCLC, MTDH, FFAR4, FHL2, NFKBIA, ASNS, BCL2L1, SOX9, TIMP1, XBP1, SQSTM1, PRAMEF2, TEK, NPM1, TGM2, TAF9, SUPV3L1, TRA…	1770	455	16792	1.814	0.000229511	2.55038e-05	8.90065e-05
GO:0050821~protein stabilization	26	1.23928	0.00395458	HSP90AB1, ATP1B3, CCT3, CDC37, ZNF207, BAG6, BAG3, TAF9, CDC37L1, GAPDH, DVL3, TCP1, GTPBP4, PDCD10, SMAD7, STXBP1, PIM2, CCT6A, UBE2B, PRKCD, DVL1, CCT4, EP300, TSC1, TBRG1, CCT8	1770	136	16792	1.81369	1	0.321641	7.24809
GO:0006406~mRNA export from nucleus	19	0.905624	0.0161621	ENY2, DDX39A, NUP98, UPF2, NUP160, AGFG1, SMG7, SMG1, RNPS1, SARNP, SRSF5, POM121, U2AF1, THOC6, SLU7, POM121C, NUP54, ALKBH5, NUP58	1770	100	16792	1.80253	1	0.587938	26.6118
GO:0042127~regulation of cell proliferation	34	1.62059	0.00174013	CXCL3, CXCL2, EGLN3, NFKBIA, SOX9, RNF126, TNFRSF1B, BAG6, PTK6, DUSP15, IL4R, CNN2, NDRG1, FAS, CIB1, GNL3, MAFG, ARHGEF2, ESRRA, CREB3, S100A11, TPD52L2, TOPORS, MBD2, GUCY2C, SIRT1, TFRC, TNFRSF10D, ACE2, CFDP1, NGFR, ABL1, ENG, ABL2	1770	185	16792	1.74356	0.999802	0.205871	3.2531
GO:0006457~protein folding	33	1.57293	0.00214039	HSP90AB1, GRPEL2, GRPEL1, FKBP4, CCT3, LMAN1, PRKCSH, CDC37, BAG5, CSNK2A2, TTC1, ERO1A, BAG3, PPIL3, CDC37L1, NUDC, HSPA9, TXNL1, TCP1, AARS, SPHK1, SACS, CCT6A, ST13, PFDN2, HSPE1-MOB4, CCT4, GNB1, PFDN4, CCT8, TXN, HSP90AB3P, RGS9	1770	180	16792	1.73928	0.999972	0.235891	3.98706
GO:0009615~response to virus	20	0.953289	0.0207035	LAMTOR5, ODC1, DUOX2, RPS15A, PIM2, HMGA2, CCL5, HMGA1, ISG20, CCL22, CCDC130, NPC2, HNRNPUL1, CXCR4, GTF2F1, TPT1, EEF1G, DDX21, FOSL1, ENO1	1770	110	16792	1.72491	1	0.641022	32.7843
GO:0002223~stimulatory C-type lectin receptor signaling pathway	19	0.905624	0.0256082	BCL10, RELA, RELB, NFKBIA, NFKB1, PSMA7, PRKCD, MAP3K7, NRAS, PDPK1, EP300, PSMD12, PSMB1, PSMA6, CLEC4A, PSMD6, TRAF6, UBA52, PSMD8	1770	105	16792	1.7167	1	0.694945	38.8968
GO:0000398~mRNA splicing, via spliceosome	40	1.90658	0.000952692	POLR2H, PRPF4B, TRA2A, SF3B5, POLR2D, BUD31, YBX1, SART1, SF3B3, SF3B2, CTNNBL1, PRPF19, SF3B1, PCBP1, RAVER1, NUDT21, U2AF1, DHX15, PPIL3, LSM3, HNRNPC, PABPC1, DDX41, GEMIN7, ZCCHC8, BCAS2, DDX39A, SNRPA1, CSTF2, PTBP1, RNPS1, SRSF5, PAPOLA, HNRNPH3, HNRNPUL1, GTF2F1, SYF2, SLU7, CWC22, SNRPE	1770	222	16792	1.70937	0.990605	0.139779	1.79364
GO:0030336~negative regulation of cell migration	17	0.810296	0.0392194	GTPBP4, EPPK1, OSBPL8, SMAD7, DRD2, PTPRU, FLCN, TPM1, SRF, CITED2, SERPINE1, RRAS, CNN2, STC1, ENG, ARHGDIA, IGFBP5	1770	95	16792	1.69767	1	0.7862	53.2207
GO:0006914~autophagy	23	1.09628	0.0216214	ATG10, VPS18, PLEKHM1, TOLLIP, ATG13, RNF185, VPS37A, PTPN22, VPS37C, SESN2, NPC1, MAP1LC3B, MAP1S, SQSTM1, SH3GLB1, XBP1, ATG2A, EPG5, VPS4B, HGS, VMP1, ABL1, DRAM1	1770	133	16792	1.64061	1	0.642723	33.9706
GO:0043161~proteasome-mediated ubiquitin-dependent protein catabolic process	35	1.66826	0.00430348	RAD23A, ABTB2, UCHL1, ZNRF1, PSMA7, RNF181, CD2AP, UBE2R2, RNF126, UBE2D3, PSMB1, RNF38, PSMD6, PSMD8, BUB3, AXIN1, ANAPC2, TOPORS, SIRT1, UBE2B, DDIT3, TRIM38, KCTD10, ATXN3, RNF44, PSMA6, CUL4A, PSMD12, UBE2K, GSK3B, RNF24, SIAH2, SPOPL, UBA52, USP44	1770	203	16792	1.63569	1	0.339072	7.8631
GO:0042981~regulation of apoptotic process	36	1.71592	0.00519958	GDF6, BEX2, TP63, BCL2L1, SOX9, RABGGTB, RPS3, NLRC4, TNFRSF1B, BOK, TPT1, NDRG1, FAS, DEDD2, BCL10, CFLAR, NOL3, AIFM2, SRA1, ACTN1, ACTN3, BIRC3, DAPK3, RASSF3, RSL1D1, PRELID1, RASSF5, UMODL1, TNFRSF10D, ETS1, BBC3, BNIP3L, NGFR, PERP, IGFBP3, BMP8B	1770	213	16792	1.60344	1	0.382252	9.42499
GO:0008380~RNA splicing	28	1.3346	0.0147004	PRPF4B, RBM15B, WBP11, NSRP1, SF3B3, SF3B2, RRAGC, DDX47, U2AF1, DHX15, PTBP3, ZPR1, ACIN1, HNRNPC, BCAS2, SNRPA1, NOL3, LGALS3, PTBP1, RNPS1, HNRNPH3, CLASRP, JMJD6, ZRANB2, THOC6, RBM39, PRPF38B, PRPF38A	1770	166	16792	1.60022	1	0.578257	24.5135
GO:0030335~positive regulation of cell migration	31	1.4776	0.0102132	CCR1, FAM110C, CCL5, CCL26, RACK1, XBP1, ILK, PDGFC, GPNMB, LAMB1, CSF1R, CIB1, BMP2, STX4, F10, PDCD10, FLT1, ARHGEF39, CREB3, MYO1C, SPHK1, GPER1, MYADM, DAPK3, TNFAIP6, ITGA5, PTP4A1, VEGFA, ADAM17, TCAF2, ACVR1	1770	184	16792	1.59835	1	0.497744	17.7111
GO:0006974~cellular response to DNA damage stimulus	34	1.62059	0.0109443	MMS19, MICA, HUS1, EGLN3, TP63, RPS27L, SPRTN, RPS3, NPAS2, CHD1L, CHD2, ZC3H12A, TAF9, WAC, BRD4, POLQ, TRAF6, MYC, TRIP12, CIB1, DDX39A, ZBTB40, TOPORS, SIRT1, UBE2B, DDIT3, NABP1, CUL4A, PHF1, BBC3, NCOA6, ABL1, PPP1R15A, UBE2E2	1770	208	16792	1.55076	1	0.5079	18.8577
GO:0001525~angiogenesis	35	1.66826	0.0175065	NRP2, FGFR1, CAV1, NRP1, PTGS2, PGF, TNFRSF12A, LEPR, CXCL8, ANPEP, UNC5B, XBP1, ANG, TGFBI, TEK, SERPINE1, ZC3H12A, ANGPTL4, CIB1, FN1, KLF5, FLT1, PDCD10, EPAS1, MMP19, STAB2, MYH9, SIRT1, ANXA2, GPI, NUS1, EREG, ITGA5, VEGFA, RBPJ	1770	223	16792	1.48899	1	0.593805	28.4929
GO:0043065~positive regulation of apoptotic process	47	2.24023	0.00590746	LDHA, PTGS2, TNFRSF12A, BNIP3, OSGIN1, BCL2L1, FLCN, LATS1, ITGB1, CTNNBL1, RACK1, NLRC4, BOK, SQSTM1, TGM2, PYCARD, FAM162A, FAS, ACIN1, TRAF6, FOSL1, ZNF622, NOX4, OBSCN, BMP2, ARHGEF2, AIFM2, BCL2A1, KLF11, TRIO, RNPS1, GPER1, GAL, RPS6, HMGA2, SIRT1, DAPK3, ATF4, ADM, NUPR1, RPS6KA2, BNIP3L, NGFR, ABL1, IGFBP3, UBA52, SLC9A1	1770	300	16792	1.4863	1	0.404359	10.641
GO:0006954~inflammatory response	59	2.8122	0.00230024	ABCF1, TUSC2, PTGS2, TOLLIP, TIRAP, NFKB1, NLRC4, CXCR4, LTB4R, FAS, ITCH, TNIP1, IRAK2, NLRP6, NFKBIZ, LY96, RELA, RELB, GPER1, GAL, TNFAIP6, TNFRSF10D, NGFR, TNFAIP3, NFKBID, CCR1, CXCL3, CXCL2, CXCL8, BDKRB1, PXK, CCL5, CCL26, TNFRSF1B, CCL22, IL17A, REL, MEFV, CCL20, PYCARD, ZC3H12A, LIAS, PTX3, NR1H4, CSF1R, NOX4, BMP2, UCN, CEBPB, SPHK1, AXL, LAT, CYBB, CCL13, P2RX7, STAB1, AOX1, HDAC9, CD14	1770	379	16792	1.47687	0.999987	0.240469	4.27869
GO:0008285~negative regulation of cell proliferation	61	2.90753	0.00246458	LZTS2, CHERP, PTGS2, NR2E3, COPS8, CNOT7, MXI1, SPRY1, CDKN2D, RARA, FOSL1, CIB1, GTPBP4, ZNF503, PTPRU, GPER1, PIM2, CD164, HMGA1, EREG, ADM, BTG1, CD33, ITGB1BP1, TBRG1, BTG3, NPPC, TGFB1I1, EMP3, DRD2, PTH1R, CXCL8, SRF, FTH1, LIF, SMARCB1, NPM1, NDRG1, GPNMB, CSF1R, NOX4, CEBPA, BMP2, MAP2K1, GNRH1, JARID2, KLF11, S100A11, BRIP1, SMAD2, SH3BP4, RASSF5, TSC1, CUL4A, RPS6KA2, ETS1, HGS, RBPJ, U…	1770	396	16792	1.46138	0.999994	0.250023	4.57765
GO:0006511~ubiquitin-dependent protein catabolic process	28	1.3346	0.0424806	TOLLIP, UCHL1, UBA6, PSMA7, CYLD, UBE2D3, BAG6, SQSTM1, XBP1, USP37, USP36, ITCH, USP34, USP15, USP32, USP31, HERPUD1, UBE2I, TOPORS, UBE2B, ADRM1, ATXN3, PSMA6, CUL4A, UBE2K, SIAH2, USP48, USP44	1770	182	16792	1.45954	1	0.800196	56.1455
GO:0016032~viral process	46	2.19256	0.00894486	CRTC2, TLN1, NUP98, CLDN9, NUP160, IL16, RAD23A, CLDN6, RBM15B, CCNT1, VIM, NFKBIA, PSMA7, DAXX, KARS, SF3B2, RACK1, GTF2E1, POM121, PSMB1, SND1, NPM1, RALA, IL2RG, BRD4, ZYX, NUP54, POM121C, TNPO1, CDK13, NUP58, PARD6A, CEBPA, CFLAR, CCDC86, CREB3, RAN, UBE2I, UBN1, SIRT1, VDAC1, PDZD8, KRT19, EP300, CUL4A, EIF4H	1770	299	16792	1.45954	1	0.471484	15.6856
GO:0045893~positive regulation of transcription, DNA-templated	77	3.67016	0.00151428	MMS19, ENY2, RAI1, FGF7, ELF4, GDF6, TP63, NFKB1, CITED2, IL31RA, PICALM, LBH, RRN3, ILK, SERTAD3, TFB2M, RARA, KDM5A, MYB, ZNF496, MYC, SS18L1, SERTAD2, ZNF281, KDM7A, BCL10, IRAK1, RAN, RELA, TOPORS, ESR2, PIM2, CDK7, HMGA2, HMGA1, DDIT3, AHR, NCOA6, MYRF, TGFB1I1, ACVR1, CNBP, HMGB2, GPBP1L1, FHL2, EHF, TRIM16, NFYA, SOX9, NR1H2, SFR1, NPAS2, INPP5K, NPM1, WAC, RUNX1, AXIN1, KLF5, DVL3, KLF7, …	1770	515	16792	1.41845	0.999401	0.196088	2.83661
GO:0006366~transcription from RNA polymerase II promoter	75	3.57483	0.00315665	BACH1, RNMT, TAF1A, ELF4, CCNT1, TP63, NFKB1, NR2E3, YBX1, TMF1, FUBP1, MAX, GTF2E1, CREB3L1, POU4F2, CREB3L4, DDX21, KDM5A, MYB, MYC, FOSL1, PITX1, RELA, TAF4B, CDK7, HMGA2, HMGA1, AHR, EP300, ZNF136, TGFB1I1, POLR2H, LCORL, ELL, EHF, NFYA, SOX9, POLR2D, SRF, ATF1, TCF21, REL, XBP1, CEBPZ, TAF9, RUNX1, CEBPA, MAFG, KLF5, SSRP1, MAFF, CEBPB, CREB3, EPAS1, CEBPG, TRIM29, KLF11, TAF7, AFF4, SMAD2, …	1770	513	16792	1.38699	1	0.285789	5.82693
GO:0006468~protein phosphorylation	65	3.09819	0.010385	BCKDK, FASTKD2, PRPF4B, CCNT1, EIF2A, LATS1, CSNK2A2, PDPK1, COL4A3BP, ILK, STKLD1, RARA, SIK1, AKT3, IRAK2, IRAK1, CSNK1G2, PRKAB2, PRKCI, PIM1, PKN1, PRKCH, PIM3, CDK7, PIM2, DGUOK, CDKL3, DAPK3, PRKCD, MARK2, MAP4K5, RIOK3, TNNI3K, NEK7, ACVR1, FGFR1, STK10, HUS1, MKNK2, TRIB3, PXK, RIOK1, TRIB1, SQSTM1, PTK6, LMTK2, DYRK3, CAMK2B, PDK1, OBSCN, BMP2, LTK, SMAD5, TRIO, ILF3, SMAD2, OXSR1, GUCY2…	1770	456	16792	1.35231	1	0.498841	17.982
GO:0006915~apoptotic process	80	3.81316	0.00597113	SH3RF1, IER3, GDF6, TP63, BNIP3, NFKB1, RASSF7, DAXX, RPS3, CTNNBL1, MAP3K7, CSNK2A2, JADE1, NLRC4, UNC5B, CXCR4, BOK, FAS, ITCH, BCL7C, CIB1, BCL7B, BCL10, YARS, PIM1, PIM3, EDAR, PIM2, DAPK3, PRKCD, DDIT3, AHR, SLTM, EP300, EMC4, THOC6, MFSD10, SIAH2, PDCD6IP, TNFAIP3, PPP1R15A, C3ORF38, TMEM214, EGLN3, BEX2, NFKBIA, PTRH2, RRAGC, RACK1, UBE2D3, IL17A, PDE1B, SH3GLB1, SQSTM1, PYCARD, ZC3H12A, D…	1770	567	16792	1.33855	1	0.402219	10.7497
GO:0045944~positive regulation of transcription from RNA polymerase II promoter	138	6.57769	0.000303217	PPP2R5B, MORF4L2, ATP1B4, NR2E3, FLCN, CNOT7, GDNF, CITED4, IL11, CITED2, WNT2, GALR2, SERPINE1, CREB3L1, CREB3L4, RARA, PITX1, AKIRIN2, TWIST1, TAF4B, RELA, STRN3, RELB, SIX5, PTPRN, AHR, DDIT3, MED10, MED19, EP300, VEGFA, UBA52, CRTC2, CNBP, HMGB2, DRD2, NFKBIA, SOX9, SRF, ATF1, NR1H2, LIF, TCF21, IL17A, AHRR, TCF20, SMARCB1, TAF9, MAML3, DDX41, TRAF6, RUNX1, NR1H4, MAFG, KLF5, MAFF, UCN, ESRRA…	1770	981	16792	1.33456	0.773515	0.0576731	0.574207
GO:0008284~positive regulation of cell proliferation	62	2.9552	0.0436743	FGF5, FGF7, PGF, CNOT7, GDNF, IL11, IL31RA, WNT2, CLCF1, ILK, PDGFC, RARA, HSF4, MYC, FOSL1, DPP4, SERTAD1, AKIRIN2, CDK13, CIB1, STX4, STX3, RELA, GPER1, RPS4X, EAPP, EREG, ADM, ITGB1BP1, VEGFA, ADAM17, DHPS, FGFR1, CNBP, PTH1R, RPS15A, BCL2L1, SOX9, ITGB1, TIMP1, LIF, RAC2, XBP1, PRAMEF2, NPM1, FN1, CSF1R, KLF5, ODC1, SHMT2, FLT1, PDCD10, HCLS1, HILPDA, SIRT1, DOT1L, CUL4A, ETS1, SYF2, KDM4C, G…	1770	466	16792	1.26222	1	0.799706	57.1721
GO:0000122~negative regulation of transcription from RNA polymerase II promoter	91	4.33746	0.0478267	CREBRF, NKAP, BACH1, TP63, NFKB1, NR2E3, FLCN, YBX1, CITED2, SAP30, ZNF350, CGGBP1, NR2F6, YEATS2, POU4F2, RARA, HSF4, KDM5A, MYB, ZNF496, MYC, AKIRIN2, TWIST1, ZNF281, ELP2, SLA2, RELA, STRN3, RELB, UBE2I, ESR2, HMGA2, MXD1, MBD2, PURB, DDIT3, UXT, KDM2B, EP300, RPS14, ZNF136, TXN, VEGFA, ATXN1L, UBA52, FGFR1, CAV1, MTDH, CHCHD3, FHL2, TRIB3, NR1H2, TCF21, UBE2D3, AHRR, REL, DRAP1, XBP1, SQSTM1,…	1770	720	16792	1.19905	1	0.819899	60.5687
GO:0006351~transcription, DNA-templated	235	11.2011	0.0164132	SLC2A4RG, ATP1B4, ZNF57, MXI1, CITED4, CITED2, MAP3K7, RARA, ZNF395, ZNF394, ZNF101, TWIST1, RXRG, ZNF501, ZNF791, ZNF503, PTPRN, MED19, UXT, SCYL1, ZNF239, VGLL4, ATXN1L, CRTC2, ZNF132, GPBP1L1, CHCHD3, ZNRD1, ZNF616, NR1H2, TCF20, AHRR, DRAP1, NR1H4, ZNF527, ZNF623, KLF7, ZNF529, ESRRA, ZBTB46, SMAD7, SMAD5, SRA1, RYBP, ZBTB40, SMAD2, ZNF524, ZNF525, SAP130, ETS2, PPRC1, CHAF1B, NKAP, CREBRF, C…	1770	1955	16792	1.14038	1	0.585588	26.9666

## Sheet: GO Cluster 5
Cluster 5 - Gene ontology results
GO term - Biological Process	Count	%	PValue	Genes	List Total	Pop Hits	Pop Total	Fold Enrichment	Bonferroni	Benjamini	FDR
GO:0001765~membrane raft assembly	6	0.210305	0.00046888	FLOT2, FLOT1, S100A10, RFTN1, EMP2, ANXA2	2607	6	16792	6.44112	0.936322	0.0408674	0.903512
GO:0006102~isocitrate metabolic process	5	0.175254	0.00253583	IDH3G, ACO2, IDH2, IDH1, IDH3B	2607	5	16792	6.44112	1	0.149608	4.79496
GO:0010918~positive regulation of mitochondrial membrane potential	4	0.140203	0.0131998	VCP, STOML2, BAD, MYC	2607	4	16792	6.44112	1	0.409744	22.6749
GO:0048205~COPI coating of Golgi vesicle	4	0.140203	0.0131998	GBF1, TMED2, TMED10, TMED9	2607	4	16792	6.44112	1	0.409744	22.6749
GO:0090261~positive regulation of inclusion body assembly	4	0.140203	0.0131998	PSMC6, PSMC5, HSF1, CDC34	2607	4	16792	6.44112	1	0.409744	22.6749
GO:1901844~regulation of cell communication by electrical coupling involved in cardiac conduction	7	0.245356	0.000292927	SRI, CAV1, CAMK2D, CALM3, PDE4D, CALM2, CALM1	2607	8	16792	5.63598	0.820991	0.028737	0.56537
GO:1901841~regulation of high voltage-gated calcium channel activity	6	0.210305	0.00143007	SRI, NOS1AP, PDE4B, CALM3, CALM2, CALM1	2607	7	16792	5.52096	0.999776	0.0985456	2.73155
GO:0051343~positive regulation of cyclic-nucleotide phosphodiesterase activity	4	0.140203	0.0291958	RACK1, CALM3, CALM2, CALM1	2607	5	16792	5.1529	1	0.601713	43.6409
GO:0042270~protection from natural killer cell mediated cytotoxicity	4	0.140203	0.0291958	SERPINB9, HLA-A, HLA-B, HLA-E	2607	5	16792	5.1529	1	0.601713	43.6409
GO:1901985~positive regulation of protein acetylation	4	0.140203	0.0291958	XBP1, CAMK1, TERF2IP, KAT5	2607	5	16792	5.1529	1	0.601713	43.6409
GO:0039694~viral RNA genome replication	7	0.245356	0.000762854	CDC42, ROCK2, RAB29, PCBP1, PCBP2, RAB5A, EEA1	2607	9	16792	5.00976	0.98868	0.05954	1.46603
GO:0006521~regulation of cellular amino acid metabolic process	39	1.36698	7.79337e-21	PSMB10, AZIN1, PSMA7, PSMB5, OAZ2, PSMB4, PSMB7, PSMB6, OAZ1, PSMB1, PSMB3, PSMB2, PSMD1, PSMD2, PSMD4, NQO1, PSMD7, PSMD8, PSMD9, PSMB8, PSMB9, PSMA2, PSMA1, PSMC6, PSMD14, PSMC5, PSMD13, PSMC4, PSMD12, PSMA5, PSMC3, PSME2, PSMD11, PSMA4, PSMC2, PSMA3, PSMC1, PSME3, PSME4	2607	51	16792	4.92556	4.57627e-17	2.28813e-17	1.50822e-17
GO:0048227~plasma membrane to endosome transport	6	0.210305	0.00332532	RAB5B, SGSM3, RAB35, RAB11A, SORT1, COMMD1	2607	8	16792	4.83084	1	0.179272	6.24272
GO:1904871~positive regulation of protein localization to Cajal body	6	0.210305	0.00332532	CCT7, CCT4, CCT8, CCT2, CCT3, CCT6A	2607	8	16792	4.83084	1	0.179272	6.24272
GO:0006734~NADH metabolic process	5	0.175254	0.0136559	VCP, IDH3B, OGDH, MDH2, MDH1	2607	7	16792	4.6008	1	0.416242	23.3637
GO:1903608~protein localization to cytoplasmic stress granule	5	0.175254	0.0136559	DHX9, DDX3X, DDX1, SSB, YBX1	2607	7	16792	4.6008	1	0.416242	23.3637
GO:0075522~IRES-dependent viral translational initiation	5	0.175254	0.0136559	EIF3A, EIF3B, PCBP2, PTBP1, SSB	2607	7	16792	4.6008	1	0.416242	23.3637
GO:0006900~membrane budding	5	0.175254	0.0136559	CHMP4A, VPS4A, S100A10, WASL, ANXA2	2607	7	16792	4.6008	1	0.416242	23.3637
GO:0019885~antigen processing and presentation of endogenous peptide antigen via MHC class I	5	0.175254	0.0136559	TAP1, HLA-A, ERAP1, TAPBP, B2M	2607	7	16792	4.6008	1	0.416242	23.3637
GO:0002479~antigen processing and presentation of exogenous peptide antigen via MHC class I, TAP-dependent	42	1.47213	6.95967e-19	PSMB10, PSMA7, B2M, PSMB5, PSMB4, PSMB7, PSMB6, PSMB1, PSMB3, ITGAV, PSMB2, PSMD1, PSMD2, PSMD4, PSMD7, PSMD8, PSMD9, HLA-H, HLA-A, HLA-C, HLA-B, HLA-E, PSMB8, PSMB9, PSMA2, PSMA1, PSMC6, PSMD14, PSMC5, PSMD13, PSMC4, PSMD12, PSMA5, PSMC3, PSME2, PSMD11, PSMA4, PSMC2, PSMA3, PSMC1, PSME3, PSME4	2607	63	16792	4.29408	4.08672e-15	1.36224e-15	1.34688e-15
GO:0035307~positive regulation of protein dephosphorylation	14	0.490712	1.74745e-06	SPPL3, DLC1, PPP2R5A, PTPA, PINK1, ADORA1, PIN1, SMPD1, CNEP1R1, CALM3, NSMF, CALM2, GBA, CALM1	2607	21	16792	4.29408	0.0102086	0.000330946	0.00338171
GO:0035308~negative regulation of protein dephosphorylation	6	0.210305	0.0065284	PTPA, ARPP19, YWHAB, ENSA, YWHAE, PPP1R15A	2607	9	16792	4.29408	1	0.276169	11.9051
GO:0045899~positive regulation of RNA polymerase II transcriptional preinitiation complex assembly	6	0.210305	0.0065284	PSMC6, PSMC5, PSMC4, PSMC3, PSMC2, PSMC1	2607	9	16792	4.29408	1	0.276169	11.9051
GO:0002480~antigen processing and presentation of exogenous peptide antigen via MHC class I, TAP-independent	6	0.210305	0.0065284	HLA-H, HLA-A, HLA-C, HLA-B, HLA-E, B2M	2607	9	16792	4.29408	1	0.276169	11.9051
GO:0010388~cullin deneddylation	6	0.210305	0.0065284	GPS1, COPS5, COPS6, COPS7A, COPS7B, COPS8	2607	9	16792	4.29408	1	0.276169	11.9051
GO:0010950~positive regulation of endopeptidase activity	6	0.210305	0.0065284	PRELID1, ADRM1, PSMD14, PSME2, PSME3, AKIRIN2	2607	9	16792	4.29408	1	0.276169	11.9051
GO:0051016~barbed-end actin filament capping	9	0.315457	0.000413953	TWF1, TWF2, GSN, CAPZA2, CAPZA1, CAPG, RDX, CAPZB, ADD1	2607	14	16792	4.14072	0.912072	0.0378559	0.798071
GO:0038061~NIK/NF-kappaB signaling	42	1.47213	8.40389e-18	PSMB10, PSMA7, PSMB5, PSMB4, PSMB7, PSMB6, PSMB1, PSMB3, PSMB2, PSMD1, PSMD2, PSMD4, PPP4C, PSMD7, FBXW11, RPS27A, CUL1, PSMD8, PSMD9, PSMB8, PSMB9, PSMA2, PSMA1, PSMC6, PSMD14, PSMC5, PSMD13, PSMC4, PSMD12, PSMA5, PSMC3, PSME2, PSMD11, PSMA4, PSMC2, UBA3, PSMA3, PSMC1, UBE2M, UBC, PSME3, PSME4	2607	66	16792	4.09889	4.93477e-14	1.23369e-14	1.62637e-14
GO:0034551~mitochondrial respiratory chain complex III assembly	5	0.175254	0.0239866	UQCC2, UQCC3, UQCR10, UQCC1, BCS1L	2607	8	16792	4.0257	1	0.551089	37.491
GO:0014909~smooth muscle cell migration	5	0.175254	0.0239866	PLAT, DDR1, AAMP, ARPC5, PLAU	2607	8	16792	4.0257	1	0.551089	37.491
GO:1903071~positive regulation of ER-associated ubiquitin-dependent protein catabolic process	5	0.175254	0.0239866	CAV1, HERPUD1, XBP1, NFE2L2, BCAP31	2607	8	16792	4.0257	1	0.551089	37.491
GO:0044829~positive regulation by host of viral genome replication	5	0.175254	0.0239866	STOM, PPIB, VAPA, NUCKS1, VAPB	2607	8	16792	4.0257	1	0.551089	37.491
GO:0075713~establishment of integrated proviral latency	5	0.175254	0.0239866	XRCC5, PPIA, XRCC6, PSIP1, BANF1	2607	8	16792	4.0257	1	0.551089	37.491
GO:0034975~protein folding in endoplasmic reticulum	8	0.280407	0.00155193	HSP90B1, EMC3, PDIA3, VAPA, EMC6, HSPA5, CALR, CANX	2607	13	16792	3.96377	0.999891	0.102885	2.96099
GO:0006120~mitochondrial electron transport, NADH to ubiquinone	30	1.05152	3.42054e-12	NDUFB3, NDUFB6, NDUFB7, NDUFB8, NDUFB9, NDUFAB1, NDUFB2, NDUFS7, NDUFS6, NDUFS5, NDUFS4, NDUFS8, NDUFS3, NDUFS2, NDUFA4, NDUFA5, NDUFB11, NDUFB10, NDUFA8, NDUFA9, NDUFA6, NDUFA7, NDUFC2, NDUFA13, COQ9, NDUFA10, NDUFA12, NDUFA11, NDUFV2, DLD	2607	49	16792	3.94354	2.00857e-08	1.54506e-09	6.61975e-09
GO:0032060~bleb assembly	6	0.210305	0.0114004	LPAR1, EMP3, PMP22, EMP2, ANO6, EMP1	2607	10	16792	3.86467	1	0.379669	19.9001
GO:1904903~ESCRT III complex disassembly	6	0.210305	0.0114004	CHMP2A, CHMP1A, CHMP1B, IST1, VTA1, VPS4A	2607	10	16792	3.86467	1	0.379669	19.9001
GO:0006613~cotranslational protein targeting to membrane	6	0.210305	0.0114004	ARL6IP1, SRP14, SEC62, TRAM1, SSR2, SSR1	2607	10	16792	3.86467	1	0.379669	19.9001
GO:0071498~cellular response to fluid shear stress	7	0.245356	0.00550632	HDAC3, XBP1, PTK2B, PKD2, HAS2, CA2, NFE2L2	2607	12	16792	3.75732	1	0.24754	10.1345
GO:0006228~UTP biosynthetic process	7	0.245356	0.00550632	NME4, NME5, NME2, NME3, NME1, CAD, NME9	2607	12	16792	3.75732	1	0.24754	10.1345
GO:0060315~negative regulation of ryanodine-sensitive calcium-release channel activity	7	0.245356	0.00550632	SRI, PKD2, CALM3, FKBP1A, GSTO1, CALM2, CALM1	2607	12	16792	3.75732	1	0.24754	10.1345
GO:0009650~UV protection	7	0.245356	0.00550632	GPX1, SCARA3, MFAP4, ERCC3, SDF4, ERCC1, ERCC2	2607	12	16792	3.75732	1	0.24754	10.1345
GO:0043248~proteasome assembly	7	0.245356	0.00550632	ADRM1, PSMD13, PSMG2, PSMD11, POMP, PSMD4, PSMD8	2607	12	16792	3.75732	1	0.24754	10.1345
GO:0030970~retrograde protein transport, ER to cytosol	8	0.280407	0.0026899	HERPUD1, HSP90B1, DERL2, SYVN1, SEC61B, VCP, FAF2, SELENOS	2607	14	16792	3.68064	1	0.154865	5.07914
GO:0048660~regulation of smooth muscle cell proliferation	5	0.175254	0.0379531	XRCC5, XRCC6, PRKDC, TCF7L2, CTNNB1	2607	9	16792	3.5784	1	0.671666	52.7063
GO:1901223~negative regulation of NIK/NF-kappaB signaling	5	0.175254	0.0379531	RELA, RASSF2, TSPAN6, CPNE1, ADIPOR1	2607	9	16792	3.5784	1	0.671666	52.7063
GO:0060020~Bergmann glial cell differentiation	5	0.175254	0.0379531	MAPK1, GFAP, VIM, PLPP3, PTPN11	2607	9	16792	3.5784	1	0.671666	52.7063
GO:0006621~protein retention in ER lumen	5	0.175254	0.0379531	KDELR2, PDIA3, GPAA1, KDELR1, OS9	2607	9	16792	3.5784	1	0.671666	52.7063
GO:1904851~positive regulation of establishment of protein localization to telomere	5	0.175254	0.0379531	CCT7, CCT4, CCT8, CCT2, CCT6A	2607	9	16792	3.5784	1	0.671666	52.7063
GO:0006596~polyamine biosynthetic process	5	0.175254	0.0379531	SAT1, OAZ2, OAZ1, SMOX, AZIN1	2607	9	16792	3.5784	1	0.671666	52.7063
GO:2000786~positive regulation of autophagosome assembly	5	0.175254	0.0379531	RAB3GAP2, SH3GLB1, RALB, PIP4K2C, PIP4K2B	2607	9	16792	3.5784	1	0.671666	52.7063
GO:0035456~response to interferon-beta	5	0.175254	0.0379531	PLSCR1, BST2, IFITM2, IFITM3, STAT1	2607	9	16792	3.5784	1	0.671666	52.7063
GO:0006123~mitochondrial electron transport, cytochrome c to oxygen	11	0.385559	0.000327531	NDUFA4, CYCS, COX7B, COX8A, COX6B1, COX4I1, COX6A1, COX7A2L, COX5A, COX5B, COX6C	2607	20	16792	3.54262	0.853916	0.0315511	0.631956
GO:0051436~negative regulation of ubiquitin-protein ligase activity involved in mitotic cell cycle	39	1.36698	1.2906e-13	PSMB10, ANAPC11, PSMA7, PSMB5, PSMB4, PSMB7, PSMB6, PSMB1, PSMB3, PSMB2, PSMD1, PSMD2, PSMD4, PSMD7, RPS27A, PSMD8, PSMD9, ANAPC5, CDC27, PSMB8, PSMB9, PSMA2, PSMA1, PSMC6, PSMD14, PSMC5, PSMD13, PSMC4, PSMD12, PSMA5, PSMC3, PSME2, PSMD11, PSMA4, PSMC2, PSMA3, PSMC1, UBC, PSME3	2607	71	16792	3.53808	7.57534e-10	7.57534e-11	2.49667e-10
GO:1903364~positive regulation of cellular protein catabolic process	6	0.210305	0.0182619	UQCC2, DACT1, PTTG1IP, FBXL5, RDX, MSN	2607	11	16792	3.51334	1	0.478976	30.0006
GO:0006098~pentose-phosphate shunt	6	0.210305	0.0182619	PGLS, TPI1, G6PD, PGD, DERA, TKT	2607	11	16792	3.51334	1	0.478976	30.0006
GO:0051437~positive regulation of ubiquitin-protein ligase activity involved in regulation of mitotic cell cycle transition	41	1.43708	6.16814e-14	PSMB10, ANAPC11, PSMA7, PSMB5, PSMB4, PSMB7, PSMB6, PSMB1, PSMB3, PSMB2, PSMD1, PSMD2, PSMD4, PSMD7, RPS27A, CUL1, PSMD8, PSMD9, ANAPC5, CDC27, PSMB8, PSMB9, PSMA2, PSMA1, PSMC6, PSMD14, PSMC5, PSMD13, PSMC4, PSMD12, PSMA5, PSMC3, PSME2, PSMD11, PSMA4, PSMC2, PSMA3, PSMC1, UBC, PSME3, PSME4	2607	76	16792	3.47481	3.62469e-10	4.02743e-11	1.1946e-10
GO:0006183~GTP biosynthetic process	7	0.245356	0.0088958	NME4, NME5, NME2, NME3, NME1, NME9, IMPDH2	2607	13	16792	3.4683	1	0.332098	15.8801
GO:0010952~positive regulation of peptidase activity	7	0.245356	0.0088958	CAV1, APP, FBLN1, NDUFA13, PINK1, PSME4, PCOLCE	2607	13	16792	3.4683	1	0.332098	15.8801
GO:0060334~regulation of interferon-gamma-mediated signaling pathway	7	0.245356	0.0088958	HSP90AB1, SUMO1, SOCS3, JAK1, STAT1, IFNGR2, CDC37	2607	13	16792	3.4683	1	0.332098	15.8801
GO:0002474~antigen processing and presentation of peptide antigen via MHC class I	16	0.560813	1.05966e-05	HLA-H, ABCB9, PDIA3, HLA-A, HLA-C, HLA-B, CALR, HLA-E, CANX, BCAP31, B2M, TAPBP, TAP1, SEC13, ERAP1, MR1	2607	30	16792	3.43526	0.0603275	0.00172695	0.0205053
GO:0006122~mitochondrial electron transport, ubiquinol to cytochrome c	8	0.280407	0.00437287	UQCC3, UQCR10, UQCRC1, UQCR11, UQCRH, CYC1, CYCS, UQCRFS1	2607	15	16792	3.43526	1	0.217361	8.1315
GO:0043149~stress fiber assembly	8	0.280407	0.00437287	SORBS1, PTK2B, ELN, RHOA, ZYX, KCTD13, SRF, ITGB1	2607	15	16792	3.43526	1	0.217361	8.1315
GO:0030150~protein import into mitochondrial matrix	9	0.315457	0.00216458	TOMM7, TIMM17A, PAM16, TIMM17B, TOMM20, TOMM40, TOMM22, TIMM50, TIMM23	2607	17	16792	3.41	0.999997	0.131841	4.10685
GO:0048025~negative regulation of mRNA splicing, via spliceosome	11	0.385559	0.000538636	RBM42, HNRNPK, C1QBP, SRSF7, SRSF6, SRSF9, DYRK1A, PTBP1, SAP18, RNPS1, RBMX	2607	21	16792	3.37392	0.957732	0.0461222	1.03726
GO:0031145~anaphase-promoting complex-dependent catabolic process	41	1.43708	3.28514e-13	PSMB10, ANAPC11, PSMA7, PSMB5, PSMB4, PSMB7, PSMB6, PSMB1, PSMB3, PSMB2, PSMD1, PSMD2, PSMD4, PSMD7, RPS27A, PSMD8, PSMD9, ANAPC5, SKP2, CDC27, PSMB8, PSMB9, PSMA2, PSMA1, PSMC6, PSMD14, PSMC5, PSMD13, PSMC4, PSMD12, PSMA5, PSMC3, PSME2, PSMD11, PSMA4, PSMC2, PSMA3, PSMC1, UBC, PSME3, PSME4	2607	79	16792	3.34286	1.92904e-09	1.60753e-10	6.35758e-10
GO:0006099~tricarboxylic acid cycle	15	0.525762	3.47151e-05	ACO2, SUCLG1, CS, IDH3B, OGDH, PDHB, SDHA, SDHB, IDH3G, SDHD, DLD, IDH2, IDH1, MDH2, MDH1	2607	29	16792	3.33161	0.184416	0.00484183	0.0671614
GO:0060071~Wnt signaling pathway, planar cell polarity pathway	47	1.64739	1.02453e-14	PSMB10, AP2S1, CLTC, PSMA7, PSMB5, PSMB4, CDC42, PFN1, PSMB7, PSMB6, PSMB1, PSMB3, PSMB2, RAC1, PSMD1, PSMD2, RHOA, PSMD4, PSMD7, RPS27A, PSMD8, AP2M1, PSMD9, FZD3, CELSR2, PSMB8, FZD7, PSMB9, PSMA2, PSMA1, PSMC6, PSMD14, PSMD13, PSMC5, PSMD12, PSMC4, PSMA5, PSMD11, PSMC3, PSME2, PSMA4, PSMC2, PSMA3, PSMC1, UBC, PSME3, PSME4	2607	92	16792	3.29057	5.99769e-11	9.99612e-12	1.9762e-11
GO:0006626~protein targeting to mitochondrion	17	0.595864	1.4438e-05	BID, TSPO, TIMM17A, MTX1, TIMM17B, TOMM40, TIMM13, TIMM23, AIP, MFN2, MFF, FIS1, TOMM7, TOMM5, TOMM20, TOMM22, FBXO7	2607	34	16792	3.22056	0.0812861	0.00222858	0.0279376
GO:0061621~canonical glycolysis	13	0.455661	0.000217085	ALDOA, PFKL, PFKFB3, PGAM1, HK1, PFKM, PKM, GPI, TPI1, ENO2, PGK1, GAPDH, ENO1	2607	26	16792	3.22056	0.72053	0.0242185	0.41928
GO:0006509~membrane protein ectodomain proteolysis	11	0.385559	0.000850885	SPPL3, NCSTN, HM13, ADAM10, PSEN2, BACE1, SPPL2A, ERAP1, PSENEN, RBMX, ADAM9	2607	22	16792	3.22056	0.993252	0.0636539	1.63389
GO:1901800~positive regulation of proteasomal protein catabolic process	8	0.280407	0.00674329	PSMC6, DDRGK1, PSMC5, PSMC4, PSMC3, XBP1, PSMC2, PSMC1	2607	16	16792	3.22056	1	0.279891	12.2732
GO:0010801~negative regulation of peptidyl-threonine phosphorylation	7	0.245356	0.0135502	EIF4G1, SPRY2, SPRED2, CALM3, SPRED1, CALM2, CALM1	2607	14	16792	3.22056	1	0.415885	23.2046
GO:0009142~nucleoside triphosphate biosynthetic process	7	0.245356	0.0135502	NME4, NME2, NME3, NME1, SUCLG1, AK4, CMPK1	2607	14	16792	3.22056	1	0.415885	23.2046
GO:1901224~positive regulation of NIK/NF-kappaB signaling	7	0.245356	0.0135502	HMGB1, NOD1, ACTN4, CALR, EIF2AK2, RC3H1, RPS3	2607	14	16792	3.22056	1	0.415885	23.2046
GO:0042407~cristae formation	6	0.210305	0.0273731	UQCC3, SAMM50, IMMT, AFG3L2, OMA1, APOO	2607	12	16792	3.22056	1	0.585611	41.5575
GO:0008154~actin polymerization or depolymerization	6	0.210305	0.0273731	CAP2, ABI2, ABI1, CAP1, WASL, DSTN	2607	12	16792	3.22056	1	0.585611	41.5575
GO:0009268~response to pH	6	0.210305	0.0273731	PAM, ARSA, ASIC1, CA2, CLCN7, GBA	2607	12	16792	3.22056	1	0.585611	41.5575
GO:0006241~CTP biosynthetic process	6	0.210305	0.0273731	NME4, NME5, NME2, NME3, NME1, NME9	2607	12	16792	3.22056	1	0.585611	41.5575
GO:0043488~regulation of mRNA stability	51	1.78759	3.36982e-15	PCBP4, PSMD1, PSMD2, PSMD4, PSMD7, PSMD8, SAMD4A, RPS27A, RC3H1, PSMD9, ZFP36, PRKCA, EXOSC4, PSMA2, EIF4G1, PSMA1, PSME2, PSMA5, PSMA4, SERBP1, PSMA3, UBC, PSME3, PSME4, PSMB10, YWHAZ, CARHSP1, PSMA7, PSMB5, ZFP36L2, PSMB4, PSMB7, PSMB6, PSMB1, PSMB3, PSMB2, APEX1, YWHAB, ELAVL1, PSMB8, PSMB9, PSMC6, PSMD14, PSMC5, PSMD13, PSMD12, PSMC4, PSMD11, PSMC3, PSMC2, PSMC1	2607	103	16792	3.18929	1.95577e-11	3.91154e-12	6.4504e-12
GO:2000134~negative regulation of G1/S transition of mitotic cell cycle	12	0.42061	0.000659727	CDKN1A, DACT1, PRMT2, CDKN2B, CTDSPL, FHL1, PKD2, BRD7, CTDSP2, SLFN11, ZNF655, FBXO7	2607	25	16792	3.09174	0.97925	0.0531174	1.26904
GO:0000715~nucleotide-excision repair, DNA damage recognition	11	0.385559	0.00129751	GPS1, COPS5, COPS6, DDB1, UBC, COPS7A, COPS7B, COPS8, PARP1, RPS27A, RBX1	2607	23	16792	3.08054	0.999511	0.0919948	2.48134
GO:0002223~stimulatory C-type lectin receptor signaling pathway	50	1.75254	4.40581e-14	HRAS, PAK2, PSMD1, PSMD2, PRKACA, PSMD4, PSMD7, PSMD8, CUL1, RPS27A, PSMD9, RELA, PSMA2, UBE2N, PSMA1, PSME2, PSMA5, PSMA4, PSMA3, UBC, PSME3, PSME4, PSMB10, UBE2V1, PSMA7, PSMB5, PSMB4, PSMB7, KRAS, UBE2D2, PSMB6, PSMB1, PSMB3, PSMB2, FBXW11, RAF1, PSMB8, PSMB9, NRAS, PSMC6, PSMD14, PSMD13, PSMC5, PSMD12, PSMC4, PSMD11, PSMC3, FYN, PSMC2, PSMC1	2607	105	16792	3.0672	2.58813e-10	3.23517e-11	8.52984e-11
GO:0032981~mitochondrial respiratory chain complex I assembly	30	1.05152	9.76626e-09	NDUFB3, NDUFAF6, NDUFB6, NDUFB7, NDUFB8, COA1, NDUFB9, NDUFAB1, NDUFB2, NDUFS7, NDUFS6, NDUFS5, NDUFS4, NDUFS8, NDUFS3, NDUFS2, NDUFA5, NDUFB11, NDUFB10, NDUFA8, NDUFA9, NDUFA6, NDUFA7, NDUFC2, NDUFA13, BCS1L, NDUFA10, NDUFA12, NDUFA11, NDUFV2	2607	63	16792	3.0672	5.73458e-05	2.73083e-06	1.89003e-05
GO:0045638~negative regulation of myeloid cell differentiation	9	0.315457	0.0050383	ZFP36, WDR61, PTK2B, LEO1, CDK6, ITPKB, PAF1, ZBTB16, MEIS1	2607	19	16792	3.05106	1	0.240144	9.31251
GO:0009116~nucleoside metabolic process	9	0.315457	0.0050383	NME4, NME5, UPRT, DNPH1, ATIC, PRPSAP1, PRPS2, PRPSAP2, APRT	2607	19	16792	3.05106	1	0.240144	9.31251
GO:0060314~regulation of ryanodine-sensitive calcium-release channel activity	9	0.315457	0.0050383	DMD, CAMK2D, CALM3, PRKACA, FKBP1A, PDE4D, SELENON, CALM2, CALM1	2607	19	16792	3.05106	1	0.240144	9.31251
GO:0061024~membrane organization	15	0.525762	0.000133137	YWHAZ, CCDC88A, YWHAB, LPCAT2, YWHAE, YWHAH, YWHAQ, RAB14, GNPAT, RALA, SGCE, RAB13, PMP2, RAB10, SGCB	2607	32	16792	3.01928	0.542434	0.0158292	0.257341
GO:0070911~global genome nucleotide-excision repair	15	0.525762	0.000133137	DDB1, UBE2I, UBE2V2, GTF2H5, RBX1, SUMO3, UBE2N, SUMO2, SUMO1, UBC, ERCC3, PARP1, ERCC1, RPS27A, ERCC2	2607	32	16792	3.01928	0.542434	0.0158292	0.257341
GO:0043277~apoptotic cell clearance	7	0.245356	0.0196685	HMGB1, TYRO3, LRP1, ITGAV, TXNDC5, PDIA6, NR1H3	2607	15	16792	3.00586	1	0.496485	31.9161
GO:1904874~positive regulation of telomerase RNA localization to Cajal body	7	0.245356	0.0196685	CCT7, CCT4, CCT8, CCT2, CCT3, CCT6A, NHP2	2607	15	16792	3.00586	1	0.496485	31.9161
GO:0000956~nuclear-transcribed mRNA catabolic process	6	0.210305	0.0389214	EXOSC10, NBAS, EXOSC4, LSM5, LSM4, RC3H1	2607	13	16792	2.97282	1	0.67396	53.619
GO:0010821~regulation of mitochondrion organization	6	0.210305	0.0389214	FIS1, MFF, SQSTM1, GOLPH3, MUL1, PINK1	2607	13	16792	2.97282	1	0.67396	53.619
GO:0021819~layer formation in cerebral cortex	6	0.210305	0.0389214	MBOAT7, GLI3, ADGRG1, CDK5, NR2E1, CTNNB1	2607	13	16792	2.97282	1	0.67396	53.619
GO:0032516~positive regulation of phosphoprotein phosphatase activity	6	0.210305	0.0389214	HSP90AB1, PTPA, CALM3, PPP1R15A, CALM2, CALM1	2607	13	16792	2.97282	1	0.67396	53.619
GO:0030837~negative regulation of actin filament polymerization	6	0.210305	0.0389214	PFN1, PFN2, TWF1, TWF2, MKKS, MYADM	2607	13	16792	2.97282	1	0.67396	53.619
GO:0006890~retrograde vesicle-mediated transport, Golgi to ER	37	1.29688	8.44388e-10	COPZ2, ARFGAP3, PITPNB, COPZ1, USE1, RAB1B, RER1, ARF5, LMAN2, RAB1A, TAPBP, COPB2, TMED7, GBF1, TMED2, TMED3, KLC1, COPB1, KIFAP3, SEC22B, TMED10, RAB6A, KDELR1, NSF, KDELR2, KIF3B, NBAS, TMED9, KIF3C, COG4, SCFD1, GOLPH3, ARF3, ARF4, ARCN1, SURF4, COPE	2607	82	16792	2.90636	4.95824e-06	2.91662e-07	1.63411e-06
GO:0070125~mitochondrial translational elongation	38	1.33193	6.63311e-10	TUFM, MRPS17, MRPS35, MRPS34, MRPL41, MRPS15, AURKAIP1, CHCHD1, MRPS12, MRPS11, MRPS30, MRPL20, MRPL13, GADD45GIP1, MRPL12, MRPL15, GFM1, MRPL54, MRPL19, MRPL18, MRPL55, MRPL37, MRPL32, MRPS26, MRPL4, MRPL51, MRPL3, MRPS23, MRPS24, MRPS21, MRPL23, MRPS18C, MRPL21, MRPL28, PTCD3, MRPL47, MRPL43, DAP3	2607	85	16792	2.87956	3.89496e-06	2.43435e-07	1.28368e-06
GO:0032543~mitochondrial translation	16	0.560813	0.000150728	MRPS17, MRPL51, MRPS34, MRPS15, CHCHD1, MRPS12, NDUFA7, MRPS11, MRPS24, MRPS21, MRPL23, MRPS18C, PTCD3, HARS, MRPL47, MRPL57	2607	36	16792	2.86272	0.587345	0.0175471	0.291295
GO:0006165~nucleoside diphosphate phosphorylation	8	0.280407	0.0141343	NME4, NME5, NME2, NME3, NME1, AK4, NME9, CMPK1	2607	18	16792	2.86272	1	0.416833	24.0798
GO:0010880~regulation of release of sequestered calcium ion into cytosol by sarcoplasmic reticulum	8	0.280407	0.0141343	SRI, DMD, CAMK2D, CALM3, PDE4D, GSTO1, CALM2, CALM1	2607	18	16792	2.86272	1	0.416833	24.0798
GO:0006096~glycolytic process	15	0.525762	0.000289417	ALDOA, LDHA, PFKL, ADPGK, PGAM1, HK1, PFKM, OGDH, GPI, TPI1, PGM1, ENO2, PGK1, GAPDH, ENO1	2607	34	16792	2.84167	0.817262	0.02888	0.558613
GO:0034198~cellular response to amino acid starvation	11	0.385559	0.00275627	CDKN1A, ATF3, SEH1L, SH3GLB1, IMPACT, RRAGA, DAP, EIF2AK2, NPRL2, GCN1, EIF2AK4	2607	25	16792	2.83409	1	0.156843	5.20132
GO:0010467~gene expression	21	0.736067	1.24188e-05	POLR2G, POLR2F, POLR2E, POLR2L, POLR2J, PTBP1, POLR2I, WTAP, HNRNPR, RBMX, HNRNPU, POLR2A, HNRNPM, HNRNPK, HNRNPH2, PCBP1, GOLPH3, HNRNPF, PCBP2, FAS, HNRNPC	2607	48	16792	2.81799	0.070328	0.00196896	0.0240308
GO:0061136~regulation of proteasomal protein catabolic process	7	0.245356	0.0274236	GPX1, PSMD14, PSME2, PINK1, PRKACA, PSME3, USP14	2607	16	16792	2.81799	1	0.584325	41.6161
GO:0007034~vacuolar transport	7	0.245356	0.0274236	CHMP2A, CHMP1A, CHMP1B, CHMP4A, CHMP6, NDFIP1, ATP6V0D1	2607	16	16792	2.81799	1	0.584325	41.6161
GO:0061028~establishment of endothelial barrier	7	0.245356	0.0274236	ICAM1, RAP1A, RAP1B, RDX, PDE4D, MSN, MYADM	2607	16	16792	2.81799	1	0.584325	41.6161
GO:0001836~release of cytochrome c from mitochondria	10	0.350508	0.00530184	BID, FIS1, MFF, GGCT, CLU, TIMM50, BAD, BCL2L1, IFI6, SOD2	2607	23	16792	2.80049	1	0.243239	9.77624
GO:0030433~ER-associated ubiquitin-dependent protein catabolic process	26	0.911321	1.04865e-06	DERL2, SYVN1, UBE2G2, EDEM2, ERLEC1, OS9, STT3B, FBXO6, HSPA5, FOXRED2, CCDC47, ERLIN2, SELENOS, UBE2J2, TMEM67, PSMC6, HSP90B1, PSMC5, SEC61B, PSMC4, VCP, PSMC3, PSMC2, PSMC1, FAF2, UBXN4	2607	60	16792	2.79115	0.00613873	0.000205234	0.00202938
GO:0045454~cell redox homeostasis	33	1.15668	3.63068e-08	TMX2, TMX1, PTGES2, PDIA3, TXN2, PRDX4, PRDX5, PDIA6, NHLRC2, PRDX2, PDIA4, PRDX3, PRDX1, GLRX2, GPX1, LTF, QSOX1, APEX1, TXNL1, P4HB, SELENOS, NME9, ERP44, TXNDC12, DIO2, PRDX6, TXNDC5, TXNDC15, TXN, DLD, TXNRD1, SH3BGRL3, NFE2L2	2607	77	16792	2.76048	0.000213171	8.88302e-06	7.0263e-05
GO:0032402~melanosome transport	9	0.315457	0.0101713	BLOC1S6, BBS7, RAB11B, RAB11A, MKKS, MREG, DCTN1, RAB1A, DCTN2	2607	21	16792	2.76048	1	0.350715	17.9507
GO:0045070~positive regulation of viral genome replication	11	0.385559	0.00386374	PPIE, SRPK2, NOTCH1, DDX3X, HACD3, PPIA, VAPB, RAD23A, DDB1, ADAR, LARP1	2607	26	16792	2.72509	1	0.198041	7.21806
GO:0070584~mitochondrion morphogenesis	8	0.280407	0.0194403	FIS1, MFF, NDUFS6, PANK2, SSBP1, POLDIP2, BCL2L1, SLIRP	2607	19	16792	2.71205	1	0.494453	31.6087
GO:0010881~regulation of cardiac muscle contraction by regulation of the release of sequestered calcium ion	8	0.280407	0.0194403	SLC8A1, DMD, CAMK2D, CALM3, PRKACA, GSTO1, CALM2, CALM1	2607	19	16792	2.71205	1	0.494453	31.6087
GO:0046716~muscle cell cellular homeostasis	8	0.280407	0.0194403	ALDOA, LAMP2, HIF1A, DMD, PFKM, SOD1, SRF, LARGE1	2607	19	16792	2.71205	1	0.494453	31.6087
GO:0036258~multivesicular body assembly	13	0.455661	0.00149079	CHMP2A, VTA1, CHMP6, CHMP4A, MVB12A, CHMP1A, CHMP1B, IST1, SNF8, RAB11A, VPS4A, VPS28, VPS36	2607	31	16792	2.70111	0.999843	0.100168	2.84593
GO:0070126~mitochondrial translational termination	36	1.26183	1.61321e-08	MRPS17, MRPS35, MRPS34, MRPL41, MRPS15, AURKAIP1, CHCHD1, MRPS12, MRPS11, MRPS30, MRPL20, MRPL13, GADD45GIP1, MRPL12, MRPL15, MRPL54, MRPL19, MRPL18, MRPL55, MRPL37, MRPL32, MRPS26, MRPL4, MRPL51, MRPL3, MRPS23, MRPS24, MRPS21, MRPL23, MRPS18C, MRPL21, MRPL28, PTCD3, MRPL47, MRPL43, DAP3	2607	86	16792	2.69628	9.47232e-05	4.30579e-06	3.12198e-05
GO:0051603~proteolysis involved in cellular protein catabolic process	20	0.701016	4.81469e-05	PSMB10, LGMN, CTSA, PSMA7, CAPN2, PSMB8, PSMB9, PSMA2, PSMB5, PSMA1, PSMB4, PSMB7, PSMB6, PSMB1, PSMA4, PSMB3, PSMA3, PSMB2, HSPA5, CTSB	2607	48	16792	2.6838	0.246273	0.00626309	0.0931356
GO:0031146~SCF-dependent proteasomal ubiquitin-dependent protein catabolic process	10	0.350508	0.00733235	RNF7, FBXW5, FBXO6, FBXL5, WWTR1, FBXO9, FBXW11, FBXL3, CUL1, RBX1	2607	24	16792	2.6838	1	0.294255	13.2746
GO:0000302~response to reactive oxygen species	16	0.560813	0.000429294	P4HB, HYAL2, TXN2, CYCS, PRDX5, PRDX2, PRDX3, SOD1, PRDX1, SOD2, GPX1, PLK3, PRDX6, TXN, TXNRD1, GSTP1	2607	39	16792	2.64251	0.91965	0.0380474	0.827532
GO:0051000~positive regulation of nitric-oxide synthase activity	9	0.315457	0.0138493	KRAS, HIF1A, NOD1, NOS1AP, PTK2B, CALM3, TERF2, CALM2, CALM1	2607	22	16792	2.635	1	0.416528	23.6539
GO:0090316~positive regulation of intracellular protein transport	9	0.315457	0.0138493	OAZ2, CDC42, B3GAT3, PLK3, OAZ1, KIF5B, RAB29, TPR, PCM1	2607	22	16792	2.635	1	0.416528	23.6539
GO:2001243~negative regulation of intrinsic apoptotic signaling pathway	9	0.315457	0.0138493	HERPUD1, MCL1, DDX3X, NDUFA13, MAPK8IP1, BCL2L1, VDAC2, IVNS1ABP, NDUFS3	2607	22	16792	2.635	1	0.416528	23.6539
GO:0034314~Arp2/3 complex-mediated actin nucleation	9	0.315457	0.0138493	ACTR3, ARPC1A, ARPC1B, ARPC3, ARPC2, TRIM27, IQGAP2, ARPC4, ARPC5	2607	22	16792	2.635	1	0.416528	23.6539
GO:0032008~positive regulation of TOR signaling	11	0.385559	0.00529525	LAMTOR5, HDAC3, LAMTOR4, LAMTOR1, SEH1L, XBP1, LAMTOR2, GOLPH3, RRAGA, SEC13, RHEB	2607	27	16792	2.62416	1	0.244872	9.76467
GO:0043001~Golgi to plasma membrane protein transport	11	0.385559	0.00529525	GOLGA7, RAB31, SYS1-DBNDD2, MACF1, GOLPH3, RAB34, VAMP5, SPTBN1, RAB10, GOLGA4, NSF	2607	27	16792	2.62416	1	0.244872	9.76467
GO:0006283~transcription-coupled nucleotide-excision repair	30	1.05152	6.94803e-07	USP7, HMGN1, POLR2G, POLR2F, POLR2E, POLR2L, COPS5, COPS6, POLR2J, POLR2I, COPS7A, COPS7B, COPS8, POLR2A, RBX1, TCEA1, ERCC3, RPS27A, ERCC1, ERCC2, GPS1, CCNH, DDB1, GTF2H5, RFC5, PPIE, POLD4, RFC2, POLD2, UBC	2607	74	16792	2.61126	0.00407157	0.000151095	0.00134462
GO:0061077~chaperone-mediated protein folding	15	0.525762	0.000803185	FKBP9, FKBP5, CLU, CRTAP, FKBP3, FKBP1A, PDIA4, CALR, CANX, PEX19, PPIB, TOR1A, FKBP14, UNC45A, FKBP2	2607	37	16792	2.61126	0.991069	0.0617693	1.54297
GO:0098609~cell-cell adhesion	109	3.82054	1.19478e-22	CAST, LDHA, SEPT2, VAPA, RPL14, ZC3HAV1, VAPB, PDLIM5, CAPZA1, IQGAP1, RAB1A, SND1, ARGLU1, DBNL, TWF1, BSG, MYO6, TWF2, KIF5B, RAN, LYPLA2, EIF2S3, EEF2, GAPVD1, DHX29, SERBP1, SDCBP, RAB10, SEPT7, DBN1, ADD1, SH3GL1, ALDOA, HDLBP, PPME1, SNX5, SNX2, SNX1, GIPC1, TAGLN2, CAPZB, PFN1, PSMB6, CDC42EP1, HNRNPK, DDX3X, MACF1, RPL6, IDH1, NUDC, UNC45A, ZC3H15, S100A11, GLOD4, GCN1, EIF4H, CCT8, SPTBN…	2607	271	16792	2.59071	7.01577e-19	7.01577e-19	2.31222e-19
GO:0006465~signal peptide processing	10	0.350508	0.00990639	SPPL3, HM13, SEC11C, SEC11A, SPCS3, SPPL2A, SPCS1, SPCS2, PROS1, PCSK5	2607	25	16792	2.57645	1	0.347352	17.5246
GO:0048709~oligodendrocyte differentiation	10	0.350508	0.00990639	SRSF1, NOTCH1, CDKN2C, PTPRZ1, OLIG1, CNP, NLGN3, GLI3, SOX8, CDK5	2607	25	16792	2.57645	1	0.347352	17.5246
GO:0015949~nucleobase-containing small molecule interconversion	10	0.350508	0.00990639	NME4, NME2, NME1, DTYMK, TXN, AK2, TXNRD1, AK4, GUK1, CMPK1	2607	25	16792	2.57645	1	0.347352	17.5246
GO:2000377~regulation of reactive oxygen species metabolic process	8	0.280407	0.0259935	TUSC2, EIF6, PDK3, ARF4, PRCP, MPV17, PINK1, STK17A	2607	20	16792	2.57645	1	0.572475	39.9322
GO:1902895~positive regulation of pri-miRNA transcription from RNA polymerase II promoter	8	0.280407	0.0259935	HIF1A, RELA, TEAD1, SMAD3, SMAD1, SRF, STAT3, GNL3	2607	20	16792	2.57645	1	0.572475	39.9322
GO:0006370~7-methylguanosine mRNA capping	13	0.455661	0.0027755	POLR2G, POLR2F, POLR2E, POLR2L, CCNH, POLR2J, POLR2I, CMTR1, GTF2H5, SUPT5H, ERCC3, POLR2A, ERCC2	2607	33	16792	2.53741	1	0.154859	5.23669
GO:0043388~positive regulation of DNA binding	11	0.385559	0.00711002	HMGB1, MYOCD, NME1, TRIM28, TXN, CALM3, EDF1, MYC, CALM2, CALM1, ERCC2	2607	28	16792	2.53044	1	0.290671	12.8979
GO:0001707~mesoderm formation	11	0.385559	0.00711002	GPI, CRB2, PRKAR1A, BMPR2, SMAD3, PRKACA, SMAD2, POFUT2, TXNRD1, WLS, SRF	2607	28	16792	2.53044	1	0.290671	12.8979
GO:0051881~regulation of mitochondrial membrane potential	11	0.385559	0.00711002	TUSC2, PRELID1, PANK2, MUL1, PINK1, CLIC1, PRDX3, BCL2L1, SOD1, PARK7, SOD2	2607	28	16792	2.53044	1	0.290671	12.8979
GO:0050690~regulation of defense response to virus by virus	11	0.385559	0.00711002	AP1M1, AP1S2, PAK2, AP1B1, ARF1, FYN, AP2S1, RAC1, HLA-A, AP2M1, B2M	2607	28	16792	2.53044	1	0.290671	12.8979
GO:0006479~protein methylation	9	0.315457	0.0184079	PRMT3, PRMT1, PRMT2, GSPT1, SNRPD3, SNRPB, PCMT1, ETF1, CARM1	2607	23	16792	2.52044	1	0.479666	30.2017
GO:0043044~ATP-dependent chromatin remodeling	9	0.315457	0.0184079	ACTB, RBBP4, SMARCB1, SMARCC2, SMARCA5, ARID1A, HNRNPC, SMARCA1, CHD4	2607	23	16792	2.52044	1	0.479666	30.2017
GO:0001731~formation of translation preinitiation complex	9	0.315457	0.0184079	EIF3A, EIF3B, EIF3G, EIF4H, EIF3K, EIF2S3, EIF3I, DENR, EIF3M	2607	23	16792	2.52044	1	0.479666	30.2017
GO:0033209~tumor necrosis factor-mediated signaling pathway	46	1.61234	1.83076e-09	PSMB10, TNFRSF21, TNFRSF12A, PSMA7, PSMB5, PSMB4, BAG4, TNFRSF1A, PSMB7, PSMB6, PSMB1, PTK2B, PSMB3, PSMB2, PSMD1, PSMD2, TNFRSF19, PSMD4, FAS, PSMD7, RPS27A, PSMD8, PSMD9, STAT1, PSMB8, PSMB9, PSMA2, PSMA1, PSMC6, PSMD14, PSMD13, PSMC5, TXNDC17, PSMC4, PSMD12, PSMA5, PSMC3, PSME2, PSMD11, PSMA4, PSMC2, PSMA3, PSMC1, UBC, PSME3, PSME4	2607	118	16792	2.51095	1.07502e-05	5.97236e-07	3.54301e-06
GO:0036498~IRE1-mediated unfolded protein response	23	0.806169	3.74517e-05	EXTL3, SYVN1, MYDGF, PDIA6, SRPRB, SEC62, DCTN1, KLHDC3, SSR1, PREB, ACADVL, HYOU1, SEC61B, TPP1, XBP1, FKBP14, CTDSP2, SHC1, HSPA5, ATP6V0D1, SEC61A1, ADD1, SERP1	2607	59	16792	2.51095	0.197417	0.00510137	0.0724539
GO:1901998~toxin transport	14	0.490712	0.0020139	NRP1, TRIP4, COPZ1, SLC7A8, ARID1A, CCT2, CCT3, CCT7, COPB2, SCFD1, CCT4, CCT8, HSPA5, CASP1	2607	36	16792	2.50488	0.999993	0.12454	3.82622
GO:0030705~cytoskeleton-dependent intracellular transport	7	0.245356	0.0483661	TUBB, KIF1B, KIF5B, KIF5C, TUBA1A, TUBA1B, TUBA1C	2607	18	16792	2.50488	1	0.741787	61.6878
GO:0007031~peroxisome organization	7	0.245356	0.0483661	PEX11A, LONP2, PEX19, PEX2, PEX16, ABCD3, SCP2	2607	18	16792	2.50488	1	0.741787	61.6878
GO:0051412~response to corticosterone	7	0.245356	0.0483661	NTRK3, CDKN1A, MAOB, CALM3, FOSB, CALM2, CALM1	2607	18	16792	2.50488	1	0.741787	61.6878
GO:0006103~2-oxoglutarate metabolic process	7	0.245356	0.0483661	GOT2, DLD, IDH2, IDH1, IDH3B, KYAT3, OGDH	2607	18	16792	2.50488	1	0.741787	61.6878
GO:0021762~substantia nigra development	19	0.665966	0.00023269	ACTB, LDHA, UCHL1, MAOB, CNP, YWHAE, CDC42, YWHAH, G6PD, DYNLL1, RHOA, YWHAQ, COX6B1, CALM3, HSPA5, NDUFS3, CALM2, POTEE, CALM1	2607	49	16792	2.49758	0.745005	0.0245396	0.449355
GO:0006094~gluconeogenesis	17	0.595864	0.000582435	ALDOA, PGAM1, G6PC3, SLC25A12, GOT2, GPI, TPI1, SLC25A13, ATF3, PGM1, ENO2, PER2, PGK1, GAPDH, MDH2, MDH1, ENO1	2607	44	16792	2.48861	0.967322	0.0483714	1.12116
GO:0016241~regulation of macroautophagy	17	0.595864	0.000582435	ATP6V0E1, CAPNS1, SNX5, UCHL1, ATP6V1G1, ATP6V1B2, CDK5, ATP6V0B, CAPN1, ATP6V0C, ATP6V0E2, SH3GLB1, ATP6V0D1, VPS26B, GAPDH, VPS26A, GBA	2607	44	16792	2.48861	0.967322	0.0483714	1.12116
GO:0040014~regulation of multicellular organism growth	10	0.350508	0.0131054	SGPL1, APP, HTRA2, FTO, ATRN, GAMT, SOD1, AFG3L2, STAT3, PTPN11	2607	26	16792	2.47735	1	0.411733	22.5317
GO:0050999~regulation of nitric-oxide synthase activity	10	0.350508	0.0131054	NOSIP, CAV1, NOS1AP, CALM3, LYPLA1, WASL, DDAH2, DDAH1, CALM2, CALM1	2607	26	16792	2.47735	1	0.411733	22.5317
GO:0048013~ephrin receptor signaling pathway	33	1.15668	7.44163e-07	HRAS, AP2S1, ARPC4, ARPC5, SDC2, ACTR3, ACTG1, CDC42, ARPC3, ARPC2, RAC1, RHOA, PSENEN, AP2M1, ACTB, ADAM10, ROCK2, EFNB1, MYL12A, VAV2, PTPN11, ARPC1A, EPHA5, NCSTN, NTRK3, SS18, ARPC1B, FYN, PSEN2, CHN1, SDCBP, WASL, CRK	2607	86	16792	2.47159	0.00436019	0.000156049	0.00144014
GO:0043161~proteasome-mediated ubiquitin-dependent protein catabolic process	77	2.69891	1.66384e-14	UCHL1, RNF216, RNF187, CTNNB1, BTBD1, UBXN2B, BTBD2, PCBP2, PSMD1, PSMD2, PSMD4, PSMD7, RPS27A, PSMD8, CUL1, RNF145, PSMD9, TBL1XR1, UBE2A, ANAPC5, DDB1, UBE2H, PSMA2, PSMA1, PSMA5, PSME2, PSMA4, PSMA3, UBC, RNF139, RNF24, PSME3, PSME4, NFE2L2, PSMB10, RAD23A, RFFL, ANAPC11, CDC34, PSMA7, STUB1, RBX1, PSMB5, PSMB4, PSMB7, UBE2D3, PSMB6, PSMB1, FBXW5, PSMB3, PPP2CB, PSMB2, HECTD3, FBXW11, APC, CSN…	2607	203	16792	2.44318	9.77884e-11	1.39698e-11	3.22298e-11
GO:0050434~positive regulation of viral transcription	11	0.385559	0.00937027	PFN1, POLR2G, NOTCH1, POLR2F, RSF1, POLR2E, POLR2L, POLR2J, POLR2I, SUPT5H, POLR2A	2607	29	16792	2.44318	1	0.33804	16.656
GO:0045727~positive regulation of translation	20	0.701016	0.000227825	EIF6, RBM3, PAIP1, ELAVL1, PINK1, QARS, EEF2, RPS27L, PYM1, RPS4X, CDK4, LARP1, EIF4G2, MAPK1, DDX3X, PTK2B, NPM1, RBMS3, SAMD4A, SERP1	2607	53	16792	2.43061	0.737614	0.0244722	0.43998
GO:0040008~regulation of growth	20	0.701016	0.000227825	MORF4L1, PPP2R1A, ENOX2, SOCS3, ZMAT3, MORF4L2, ARMC10, TGFBR2, SOCS6, NEDD9, TKT, DMAP1, KAT5, UBE2E3, AES, PAK2, HEPACAM, PPP2CA, SHC1, GAP43	2607	53	16792	2.43061	0.737614	0.0244722	0.43998
GO:0009306~protein secretion	12	0.42061	0.00672317	STEAP3, PREB, ARFGAP3, TMEM167A, TMEM167B, GOLPH3, ERP29, RAB13, PDIA4, OLFM2, CANX, TVP23A	2607	32	16792	2.41542	1	0.281147	12.2388
GO:1900026~positive regulation of substrate adhesion-dependent cell spreading	12	0.42061	0.00672317	CDC42, LIMS1, C1QBP, ARPC2, PREX1, RAC1, S100A10, HAS2, CALR, CRK, MYADM, CIB1	2607	32	16792	2.41542	1	0.281147	12.2388
GO:0050852~T cell receptor signaling pathway	55	1.9278	3.13757e-10	HRAS, STOML2, PAK2, PDE4B, PSMD1, PSMD2, PSMD4, PSMD7, PSMD8, CUL1, RPS27A, PSMD9, RELA, PDE4D, RFTN1, THY1, PSMA2, UBE2N, PSMA1, MAPK1, PSMA5, PSME2, PSMA4, PSMA3, UBC, RIPK2, PSME3, PSME4, PSMB10, TNFRSF21, UBE2V1, PSMA7, PSMB5, PSMB4, PSMB7, UBE2D2, PSMB6, PSMB1, PSMB3, PSMB2, FBXW11, SPPL3, PSMB8, PSMB9, PSMC6, PSMD14, PSMC5, PSMD13, PSMD12, PSMC4, PSMD11, PSMC3, FYN, PSMC2, PSMC1	2607	148	16792	2.39366	1.84238e-06	1.22825e-07	6.07201e-07
GO:0070979~protein K11-linked ubiquitination	10	0.350508	0.0170105	UBE2D4, UBE2E3, UBE2D3, UBE2A, ANAPC5, ANAPC13, ANAPC11, UBE2H, UBE2L3, CDC27	2607	27	16792	2.3856	1	0.463068	28.2534
GO:0033683~nucleotide-excision repair, DNA incision	14	0.490712	0.00349008	DDB1, GTF2H5, RBX1, RFC5, POLD4, RFC2, POLD2, UBC, ERCC3, PARP1, OGG1, ERCC1, RPS27A, ERCC2	2607	38	16792	2.37304	1	0.183936	6.5422
GO:0090263~positive regulation of canonical Wnt signaling pathway	44	1.54224	3.60765e-08	PSMB10, CAV1, GPRC5B, PSMA7, PIN1, PSMB5, PSMB4, PSMB7, PSMB6, PSMB1, PSMB3, PSMB2, ILK, PSMD1, PSMD2, PSMD4, TNKS, PSMD7, RPS27A, PSMD8, PSMD9, WLS, DAPK3, PSMB8, PSMB9, PSMA2, PSMA1, PSMC6, PSMD14, PSMC5, PSMD13, PSMC4, PSMD12, PSMA5, PSMC3, PSME2, PSMD11, PSMA4, PSMC2, PSMA3, PSMC1, UBC, PSME3, PSME4	2607	120	16792	2.36174	0.000211819	9.21044e-06	6.98173e-05
GO:0097193~intrinsic apoptotic signaling pathway	11	0.385559	0.0121401	APOPT1, CDKN1A, HRAS, CASP4, DDX3X, CYCS, MLLT11, CLU, DIABLO, BAD, CUL1	2607	30	16792	2.36174	1	0.39021	21.0519
GO:0006635~fatty acid beta-oxidation	16	0.560813	0.00182732	CPT1C, ECI2, ACADM, ECH1, ECHS1, DECR1, ACAT1, HADHA, HADHB, ACADVL, PEX2, ABCD2, ABCD3, HADH, CROT, ACAA1	2607	44	16792	2.34223	0.999978	0.11489	3.47766
GO:0071526~semaphorin-plexin signaling pathway	12	0.42061	0.008697	SEMA5A, SEMA6A, NRP1, SEMA6C, SEMA6D, PLXNB2, RAC1, SEMA4C, SEMA4B, SEMA3A, PLXND1, ARHGDIA	2607	33	16792	2.34223	1	0.330162	15.553
GO:1901687~glutathione derivative biosynthetic process	8	0.280407	0.0432638	MGST3, GSTA4, AKR1A1, GSTK1, ESD, GSTO1, MGST1, GSTP1	2607	22	16792	2.34223	1	0.707949	57.5108
GO:0039702~viral budding via host ESCRT complex	8	0.280407	0.0432638	CHMP2A, MVB12A, CHMP1A, CHMP1B, CHMP4A, CHMP6, VPS4A, VPS28	2607	22	16792	2.34223	1	0.707949	57.5108
GO:0001954~positive regulation of cell-matrix adhesion	8	0.280407	0.0432638	PTK2B, DMD, CSF1, ILK, CDK6, EMP2, PLEKHA2, CIB1	2607	22	16792	2.34223	1	0.707949	57.5108
GO:0000717~nucleotide-excision repair, DNA duplex unwinding	8	0.280407	0.0432638	DDB1, UBC, GTF2H5, PARP1, ERCC3, RPS27A, RBX1, ERCC2	2607	22	16792	2.34223	1	0.707949	57.5108
GO:0006888~ER to Golgi vesicle-mediated transport	58	2.03295	2.9681e-10	IER3IP1, VAPA, VAPB, TRAPPC2L, USE1, RAB1B, RAB1A, COPB2, GBF1, DYNLL1, COPB1, RAB29, GOPC, KDELR1, NSF, VTI1B, DCTN6, DCTN3, YIF1B, DCTN4, DCTN1, DCTN2, BCAP31, ARCN1, TRAPPC4, TRAPPC1, PROS1, COPE, TRAPPC3, DYNC1I2, SEC23B, NRBP2, COPZ2, ARFGAP3, COPZ1, LMAN2, TMED7, TMED2, TMED3, STX17, BCAP29, TMED10, SEC22B, TEX261, RAB2A, TMED9, PREB, COG4, HYOU1, VCP, COG8, GRIA1, CD59, RAB35, ARF4, SPTBN1…	2607	160	16792	2.33491	1.74287e-06	1.24491e-07	5.74405e-07
GO:0007017~microtubule-based process	13	0.455661	0.00625006	TUBB2B, TUBB2A, VBP1, DCTN3, DCTN2, TUBB, DYNLL1, KIFAP3, TUBA1A, TUBA1B, TUBA1C, TUBB3, TUBB4B	2607	36	16792	2.32596	1	0.269965	11.4262
GO:0042769~DNA damage response, detection of DNA damage	13	0.455661	0.00625006	MRPS35, MRPS26, DDB1, MRPS11, RPS3, RBX1, RFC5, POLD4, RFC2, POLD2, UBC, PARP1, RPS27A	2607	36	16792	2.32596	1	0.269965	11.4262
GO:0016050~vesicle organization	10	0.350508	0.0217003	PLEKHF1, CAV1, SNX5, SNX2, SNX1, SORT1, PINK1, SNX33, WASL, SNX10	2607	28	16792	2.3004	1	0.521047	34.5956
GO:0000387~spliceosomal snRNP assembly	10	0.350508	0.0217003	STRAP, SNRPD3, WDR77, SNRPB, SNRPD1, LSM4, SNRPD2, SNRPC, TGS1, SNRPF	2607	28	16792	2.3004	1	0.521047	34.5956
GO:0032481~positive regulation of type I interferon production	18	0.630915	0.00123834	XRCC5, IRAK1, DHX9, POLR2F, POLR2E, POLR3H, POLR2L, ZC3HAV1, POLR1D, RELA, XRCC6, CRCP, PRKDC, IFI16, CTNNB1, MYD88, DHX36, LRRFIP1	2607	51	16792	2.27334	0.999308	0.0890639	2.36947
GO:0006296~nucleotide-excision repair, DNA incision, 5'-to lesion	13	0.455661	0.00796864	RFC5, POLD4, RFC2, DDB1, POLD2, UBC, GTF2H5, PARP1, ERCC3, RPS27A, ERCC1, RBX1, ERCC2	2607	37	16792	2.2631	1	0.311232	14.3441
GO:0018279~protein N-linked glycosylation via asparagine	14	0.490712	0.00574081	SYVN1, UBE2G2, STT3B, MAGT1, STT3A, VCP, ST3GAL5, DPM1, RPN1, DAD1, DPM2, DPM3, RPN2, DDOST	2607	40	16792	2.25439	1	0.254705	10.5437
GO:0071377~cellular response to glucagon stimulus	14	0.490712	0.00574081	GNG11, GNG12, PRKAR2B, ADCY9, GNB2, GNB1, PRKAR1B, GNG10, PRKAR1A, PRKACA, GNG2, GNG4, GNG5, GNG7	2607	40	16792	2.25439	1	0.254705	10.5437
GO:0008654~phospholipid biosynthetic process	14	0.490712	0.00574081	PLA2G16, CRLS1, CDIPT, HEXB, LPCAT3, CHPT1, AGPAT5, LPCAT1, SH3GLB1, MBOAT7, SERINC1, AGPAT3, AGPAT1, PTDSS2	2607	40	16792	2.25439	1	0.254705	10.5437
GO:0043280~positive regulation of cysteine-type endopeptidase activity involved in apoptotic process	14	0.490712	0.00574081	HMGB1, NDUFA13, BAD, BCAP31, FIS1, APOPT1, NOD1, HTRA2, HSF1, DDX3X, PDCD5, PDCD6, MYC, ARL6IP5	2607	40	16792	2.25439	1	0.254705	10.5437
GO:0000245~spliceosomal complex assembly	9	0.315457	0.0383067	SRPK2, SF3B1, SNRPD3, USP39, DDX1, SNRPD1, LSM4, SNRPD2, TXNL4A	2607	26	16792	2.22962	1	0.669785	53.0415
GO:0006997~nucleus organization	9	0.315457	0.0383067	CHMP2A, CHMP1A, CHMP1B, CHMP4A, CHMP6, PITPNB, VPS4A, H3F3A, GOLM1	2607	26	16792	2.22962	1	0.669785	53.0415
GO:2001238~positive regulation of extrinsic apoptotic signaling pathway	9	0.315457	0.0383067	BID, CAV1, HYAL2, PAK2, PDIA3, TNFRSF12A, AGT, FADD, ITM2C	2607	26	16792	2.22962	1	0.669785	53.0415
GO:0042149~cellular response to glucose starvation	10	0.350508	0.0272488	MTMR3, BECN1, XBP1, SH3GLB1, IMPACT, PRKAA1, RRP8, HSPA5, IFI16, NFE2L2	2607	29	16792	2.22108	1	0.585904	41.4127
GO:0090090~negative regulation of canonical Wnt signaling pathway	56	1.96285	5.80122e-09	GLI3, AES, PSMD1, PSMD2, PSMD4, PSMD7, PSMD8, RPS27A, PSMD9, G3BP1, PSMA2, PSMA1, DACT1, PSMA5, PSME2, PSMA4, PFDN5, PSMA3, UBC, PSME3, MCC, PSME4, MAD2L2, PSMB10, CAV1, CDH2, PSMA7, TCF7L2, SDHAF2, RBX1, PSMB5, PSMB4, PSMB7, PSMB6, PSMB1, PSMB3, PSMB2, APC, CSNK1A1, WWTR1, PSMB8, PSMB9, DKK3, NOTCH1, PSMC6, RGS20, PSMD14, PSMC5, PSMD13, PSMD12, PSMC4, PSMD11, PSMC3, PSMC2, PSMC1, IGFBP2	2607	163	16792	2.2129	3.40642e-05	1.70324e-06	1.12269e-05
GO:0071902~positive regulation of protein serine/threonine kinase activity	12	0.42061	0.0139562	HSP90AB1, SPRY2, SLC27A1, PPP2CA, RHOA, RALB, CAMK1, CALM3, LTF, CALM2, CIB1, CALM1	2607	35	16792	2.20838	1	0.414856	23.814
GO:0033572~transferrin transport	12	0.42061	0.0139562	ATP6V0C, STEAP3, ATP6V0E1, ATP6V0E2, ATP6AP1, RAB11B, ATP6V1B2, ATP6V1G1, CLTC, ATP6V0D1, ATP6V0B, ATP6V1F	2607	35	16792	2.20838	1	0.414856	23.814
GO:0031648~protein destabilization	12	0.42061	0.0139562	SENP2, TMEM147, XBP1, GSN, PEX2, RNF139, MUL1, PRKDC, NOMO2, FBXW11, FBXL3, TRIM21	2607	35	16792	2.20838	1	0.414856	23.814
GO:0016236~macroautophagy	26	0.911321	0.000126179	ATG12, PINK1, RRAGA, MTMR3, TOMM7, DYNLL1, MAP1LC3A, MAP1LC3B, TOMM5, SQSTM1, PRKAA1, RPS27A, LAMTOR5, LAMTOR4, LAMTOR1, BECN1, LAMTOR2, TOMM40, VDAC1, MFN2, EI24, NBR1, UBC, TOMM20, RHEB, TOMM22	2607	76	16792	2.20354	0.523348	0.0153183	0.243906
GO:0030163~protein catabolic process	14	0.490712	0.00723477	USE1, PPT1, TRIM24, PSMC6, PSMC5, LONP2, PSMC4, TPP1, PSMC3, PSMC2, BACE1, PSMC1, CTSD, UCHL3	2607	41	16792	2.19941	1	0.292942	13.1094
GO:0000209~protein polyubiquitination	62	2.17315	1.91306e-09	MKRN1, CBFB, MGRN1, PSMD1, PSMD2, PSMD4, PSMD7, PSMD8, CUL1, RPS27A, RNF145, PSMD9, UBE2A, DTX3L, SKP2, UBE2J2, PSMA2, PSMA1, PSMA5, PSME2, PSMA4, PSMA3, RNF139, UBC, RNF24, PSME3, PSME4, PSMB10, UBE2V1, UBE2V2, CDC34, PSMA7, STUB1, RBX1, PSMB5, PSMB4, PSMB7, UBE2D3, UBE2D2, PSMB6, PSMB1, PSMB3, PSMB2, FBXO6, TNKS, RNF167, FBXW11, TRIP12, UBE2L3, PSMB8, TRIM21, PSMB9, PSMC6, PSMD14, PSMD13, PSMC5…	2607	184	16792	2.17038	1.12334e-05	5.91236e-07	3.70227e-06
GO:0034976~response to endoplasmic reticulum stress	25	0.876271	0.000274302	TMX1, PDIA3, UFC1, PDIA6, PDIA4, TMEM259, OS9, SRPX, XBP1, TARDBP, PPP2CB, SCAMP5, P4HB, HERPUD1, DDRGK1, ERP27, FLOT1, EEF2, ERP44, HYOU1, HSP90B1, ATP2A2, TXNDC5, PLA2G6, PPP1R15A	2607	75	16792	2.14704	0.800296	0.0278661	0.529511
GO:0042542~response to hydrogen peroxide	17	0.595864	0.00343114	SLC8A1, LDHA, STK25, HP, EEF2, BAD, PRDX3, SOD1, STAT1, SOD2, GLRX2, GPX1, DUSP1, PTK2B, PPP2CB, HSPD1, ADAM9	2607	51	16792	2.14704	1	0.18276	6.43517
GO:0000910~cytokinesis	16	0.560813	0.00472789	ROCK2, BECN1, JTB, BCL2L1, DCTN3, DAPK3, ARL3, RAB35, IST1, RALB, RAB11A, RALA, RHOC, SEPT6, SEPT7, NEK6	2607	48	16792	2.14704	1	0.229006	8.76339
GO:0030148~sphingolipid biosynthetic process	16	0.560813	0.00472789	ACER3, SGPL1, SPHK2, VAPA, HACD3, SPTLC2, VAPB, CERS5, PLPP3, PLPP2, ELOVL1, ELOVL5, CERS1, CERS2, ELOVL2, DEGS1	2607	48	16792	2.14704	1	0.229006	8.76339
GO:0030968~endoplasmic reticulum unfolded protein response	15	0.525762	0.00652468	DERL2, SYVN1, VAPB, AARS, SELENOS, EDEM2, STUB1, VCP, XBP1, HSPA5, NFE2L2, EIF2AK2, SERP2, PPP1R15A, SERP1	2607	45	16792	2.14704	1	0.278014	11.8987
GO:0006986~response to unfolded protein	14	0.490712	0.00901997	STT3B, HSP90AB1, MFN2, ERP44, HERPUD1, TMBIM6, FBXO6, FAF2, HSPE1, UBE2J2, HSPD1, HERPUD2, MANF, UBXN4	2607	42	16792	2.14704	1	0.333789	16.0838
GO:0007566~embryo implantation	14	0.490712	0.00901997	BSG, IGFBP7, TGFBR2, TRIM28, CST3, SOD1, UBE2Q1, DDR1, FBLN1, H3F3A, VMP1, EMP2, PCSK5, SPP1	2607	42	16792	2.14704	1	0.333789	16.0838
GO:0006446~regulation of translational initiation	12	0.42061	0.017347	EIF4G1, EIF4G2, EIF3A, EIF3B, EIF3G, EIF4H, DDX1, EIF3K, EIF3I, EIF2B1, EIF2AK4, EIF3M	2607	36	16792	2.14704	1	0.467621	28.7271
GO:0002027~regulation of heart rate	11	0.385559	0.0241488	SLC8A1, BVES, EPAS1, AGT, DMD, CALM3, PRKACA, PDE4D, SEMA3A, CALM2, CALM1	2607	33	16792	2.14704	1	0.551528	37.6918
GO:0033574~response to testosterone	10	0.350508	0.0337239	GPI, TSPO, DUSP1, HSF1, NME1, CAD, BAD, CALR, CDK4, GBA	2607	30	16792	2.14704	1	0.645967	48.5162
GO:0090383~phagosome acidification	9	0.315457	0.0472735	ATP6V0C, RAB7A, ATP6V0E1, ATP6V0E2, ATP6V1B2, ATP6V1G1, ATP6V0D1, ATP6V0B, ATP6V1F	2607	27	16792	2.14704	1	0.735208	60.8275
GO:0031647~regulation of protein stability	23	0.806169	0.000640366	TADA3, DPH6, MUL1, CTSA, GIPC1, TRIM24, STUB1, CDC42, MAPK1, SUMO1, LAMP2, HDAC3, DACT1, TOMM7, KRAS, SH3GLB1, XBP1, CD81, DPM2, DPM3, TPR, PSMD8, FBXO7	2607	70	16792	2.11637	0.97675	0.0523166	1.23202
GO:0016032~viral process	98	3.43498	1.53825e-13	IL6ST, RBM15B, RNF216, CBX5, TOP1, GBF1, SND1, RALA, CUL1, RAN, HLA-A, MFGE8, HLA-C, HLA-B, BICD1, MAPK1, PSMA4, PSMA3, SEPT6, CRTC3, GRB2, RAD23A, PSMA7, RBX1, PSMB5, ATP6V0C, PSMB4, PSMB7, PSMB6, HNRNPK, GADD45GIP1, PSMB1, PSMB3, PSMB2, NPM1, TRAM1, CAMLG, FDPS, KCTD5, KAT5, PSMB8, VDAC1, PSMB9, EIF4E, PSMC3, PSMC2, EIF4H, ATF7, HSPD1, COPS6, NUP188, RTN3, DYNLL1, PAK2, SEH1L, COPB1, GTF2A2, RH…	2607	299	16792	2.11114	9.03565e-10	8.21423e-11	2.97795e-10
GO:0045184~establishment of protein localization	13	0.455661	0.0153888	CHMP2A, LIMS1, NPNT, NLGN1, RDX, SELENOS, WBP2, ZDHHC15, CHMP1B, VCP, WDPCP, IST1, MCC	2607	40	16792	2.09336	1	0.440121	25.9277
GO:0048813~dendrite morphogenesis	12	0.42061	0.0213147	RBFOX2, TMEM106B, FYN, MAP2, RAC1, ABI1, CELSR2, SEMA3A, CDK5, ITGB1, DCLK1, SDC2	2607	37	16792	2.08901	1	0.518712	34.0949
GO:0030032~lamellipodium assembly	10	0.350508	0.0411856	ABLIM1, CCDC88A, GOLPH3, ARHGEF6, RAC1, CYFIP1, VAV2, SPATA13, CAPZB, VCL	2607	31	16792	2.07778	1	0.693225	55.6886
GO:0019058~viral life cycle	10	0.350508	0.0411856	CHMP2A, PPIA, CHMP4A, CHMP6, VTA1, UBC, VPS4A, VPS28, PCSK5, RPS27A	2607	31	16792	2.07778	1	0.693225	55.6886
GO:0016049~cell growth	18	0.630915	0.00381424	ATP6V0E1, ENOX2, LAMTOR1, ACTA1, LAMTOR2, SLC3A2, TGFB3, DDX5, NOTCH2, ATP6V0E2, NDRG4, XBP1, ITGAV, NOP58, EMP3, SEC61A1, EMP1, XRN2	2607	56	16792	2.07036	1	0.197482	7.1288
GO:0006413~translational initiation	44	1.54224	2.343e-06	RPL18, EIF6, RPL14, COPS5, RPL36, EIF2A, RPS2, RPS3, LARP1, EIF3A, EIF3B, RPL7, EIF3G, RPL6, RPLP0, EIF1AX, RPL8, RPL3, EIF3K, RPL26L1, RPL10, RPL5, EIF3I, RPL4, RPS27A, EIF3M, EIF2B4, RPS24, RPSA, PAIP1, EIF2S3, RPS4X, RPS5, EIF2B1, RPS8, EIF4G1, EIF4G2, EIF4E, RPS16, DHX29, EIF4H, EIF2S2, RPS10, EIF4E2	2607	137	16792	2.06868	0.0136639	0.000429849	0.00453422
GO:0038095~Fc-epsilon receptor signaling pathway	57	1.9979	6.83215e-08	HRAS, PAK2, PSMD1, PSMD2, PSMD4, SHC1, PSMD7, PSMD8, CUL1, RPS27A, PSMD9, RELA, PSMA2, UBE2N, PSMA1, MAPK1, PSMA5, PSME2, PSMA4, PSMA3, UBC, PSME3, PSME4, PSMB10, GRB2, UBE2V1, PSMA7, PSMB5, PSMB4, PSMB7, KRAS, UBE2D2, PSMB6, PSMB1, PSMB3, PSMB2, RAC1, NFATC2, FBXW11, MAPK10, VAV2, PSMB8, PSMB9, NRAS, PSMC6, PSMD14, PSMC5, PSMD13, PSMC4, PSMD12, PSMC3, PSMD11, PSMC2, PSMC1, CALM3, CALM2, CALM1	2607	178	16792	2.06261	0.000401103	1.60472e-05	0.00013222
GO:0043086~negative regulation of catalytic activity	24	0.84122	0.000716752	NES, PPME1, ANP32E, RNH1, ARPP19, ENSA, PRPSAP1, ANXA5, HNRNPR, ANXA2, ANXA2P2, TIMP1, PRPSAP2, HSPBP1, OAZ2, NOTCH1, NOSIP, OAZ1, CABIN1, PTN, SCG5, FAF2, NQO1, PPP1R14B	2607	75	16792	2.06116	0.985158	0.0567992	1.37802
GO:0071230~cellular response to amino acid stimulus	15	0.525762	0.00988443	LAMTOR5, LAMTOR4, LAMTOR1, LAMTOR2, RRAGA, BCL2L1, ZEB1, CAPN2, COL5A2, XBP1, IPO5, COL1A2, DNMT1, COL6A1, NSMF	2607	47	16792	2.05568	1	0.348774	17.4892
GO:0006695~cholesterol biosynthetic process	12	0.42061	0.0259099	TM7SF2, CYB5R3, EBP, CNBP, G6PD, CYP51A1, FDPS, ACLY, PRKAA1, PMVK, IDI1, HSD17B7	2607	38	16792	2.03404	1	0.573289	39.8323
GO:0038128~ERBB2 signaling pathway	12	0.42061	0.0259099	NRAS, HRAS, KRAS, USP8, GRB2, GAB1, UBC, SHC1, CPNE3, STUB1, RPS27A, CDC37	2607	38	16792	2.03404	1	0.573289	39.8323
GO:0000381~regulation of alternative mRNA splicing, via spliceosome	12	0.42061	0.0259099	RBFOX2, SRSF6, RBM15B, RBM4, DYRK1A, PTBP1, SAP18, RNPS1, DDX5, WTAP, RBMX, UHMK1	2607	38	16792	2.03404	1	0.573289	39.8323
GO:0034599~cellular response to oxidative stress	20	0.701016	0.00303832	TXNL1, VKORC1L1, TXN2, PINK1, PRDX2, SELENOS, PRDX3, SELENON, PARK7, GPX1, NME2, PYCR2, G6PD, ATP2A2, HTRA2, XBP1, PRKRA, NFE2L2, PARP1, ETV5	2607	64	16792	2.01285	1	0.166673	5.71886
GO:0031175~neuron projection development	31	1.08658	0.00018653	GPRIN1, HMGB1, SEPT2, VAPA, SRF, CAPZB, UHMK1, MANF, BLOC1S6, ATCAY, PRMT1, APP, BLOC1S4, BLOC1S2, ATXN10, PTK2B, TOR1A, BLOC1S1, RAB11A, CDK16, GBA, STMN3, NCDN, WDR5, NLGN1, CDK5, TBC1D24, RAB35, MAP2, MAP4, RAB13	2607	100	16792	1.99675	0.665597	0.0212496	0.360367
GO:0001658~branching involved in ureteric bud morphogenesis	13	0.455661	0.02266	NPNT, GLI3, DCHS1, CITED1, CTNNB1, HOXD11, LAMA5, SALL1, ILK, PKD2, PBX1, PTCH1, MYC	2607	42	16792	1.99368	1	0.534535	35.8262
GO:0016192~vesicle-mediated transport	47	1.64739	3.24356e-06	CCZ1B, CLTA, AP1M1, ARFGAP3, CLTB, AP1B1, AP2S1, COPZ1, AP3S1, CLTC, RAB1A, TVP23A, RTN3, COPB2, SFT2D2, AP1S2, STX12, COPB1, PLIN3, VPS4A, SEC22B, RAB11A, JAGN1, CCZ1, GOLGA4, SAR1A, NSF, RHOBTB3, AP2M1, GDI2, MLC1, VTI1B, VPS41, ERGIC3, TRAPPC12, ADAMTS9, CHMP1A, BVES, KXD1, RAB14, CPNE1, VAMP5, CPNE3, MAPK8IP1, RAB10, YKT6, SEC23B	2607	152	16792	1.99166	0.018866	0.000560025	0.00627694
GO:0006979~response to oxidative stress	34	1.19173	9.12359e-05	ATOX1, PINK1, PRDX5, PRDX2, PRDX3, SDHAF3, RPS3, PSMB5, HMOX2, GPX1, APP, GPX4, TOR1A, NDUFS8, GAB1, PSIP1, IDH1, ERCC3, NDUFS2, ERCC1, ERCC2, STK25, NDUFA6, ATRN, MSRB1, NDUFA12, MSRB2, DUSP1, PON2, CA3, SCARA3, OGG1, C19ORF12, PRNP	2607	110	16792	1.99089	0.414776	0.0113345	0.176417
GO:0032570~response to progesterone	12	0.42061	0.0311802	GPI, TSPO, CAV1, NCOA1, RELA, TGFB3, OXTR, PTN, ABHD2, BAD, FOSB, NR1H3	2607	39	16792	1.98188	1	0.622374	45.8291
GO:0042752~regulation of circadian rhythm	15	0.525762	0.0144689	ROCK2, KLF10, CREM, PRKDC, MAPK10, PPP1CC, PPP1CB, NONO, MAGED1, PPP1CA, SFPQ, PER2, PRKAA1, FBXL3, NR1H3	2607	49	16792	1.97177	1	0.422243	24.5769
GO:0043123~positive regulation of I-kappaB kinase/NF-kappaB signaling	49	1.71749	3.19187e-06	SLC44A2, SLC20A1, VAPA, ZC3HAV1, TSPAN6, PINK1, TERF2IP, LPAR1, CANT1, CTNNB1, MYD88, TMEM9B, NOD1, MIER1, RHOA, LTF, RHOC, CASP1, GPR89A, RPS27A, IRAK1, BST2, RELA, FADD, UBE2I, WLS, UBE2N, C18ORF32, ATP2C1, UBC, RIPK2, EEF1D, NEK6, MTDH, LITAF, UBE2V1, FKBP1A, GPRC5B, IRAK4, TNFRSF1A, TMED4, SLC35B2, SHISA5, TNFRSF19, LGALS1, NDFIP1, MUL1, S100A13, FYN	2607	161	16792	1.96034	0.0185681	0.000567799	0.00617692
GO:0051591~response to cAMP	14	0.490712	0.0198035	BSG, LDHA, RELA, CREM, SPARC, FOSB, STAT1, CITED1, NDUFS4, DUSP1, NME1, PTK2B, CARM1, PLA2G5	2607	46	16792	1.96034	1	0.496847	32.0974
GO:0006749~glutathione metabolic process	17	0.595864	0.009307	GSTA4, CLIC1, SOD1, GLRX2, SOD2, GPX1, GGT5, G6PD, CLIC4, GSTK1, EEF1E1, IDH1, EEF1G, GLO1, GSTO1, GSTP1, MGST1	2607	56	16792	1.95534	1	0.338226	16.553
GO:0000413~protein peptidyl-prolyl isomerization	13	0.455661	0.0271223	FKBP9, FKBP5, PTPA, PPIL1, FKBP3, FKBP1A, PIN1, PPIE, PPIB, PPIA, PPIC, FKBP14, FKBP2	2607	43	16792	1.94732	1	0.586173	41.2652
GO:0050821~protein stabilization	41	1.43708	2.88713e-05	HSP90AB1, USP7, ATP1B1, SYVN1, ATP1B2, SAV1, TAF9B, CLU, PINK1, CCT2, CCT3, CALR, PLPP3, CDC37, PIN1, PFN1, SUMO1, PFN2, GOLGA7, BAG6, STX12, PEX19, TAF9, USP33, GAPDH, FLOT2, PHB, CRTAP, MUL1, SMAD3, CCT6A, PARK7, CCT7, LAMP2, CDKN1A, CCT4, PPIB, PHB2, CCT8, RASSF2, HSPD1	2607	136	16792	1.94181	0.155942	0.00412645	0.0558586
GO:0006919~activation of cysteine-type endopeptidase activity involved in apoptotic process	25	0.876271	0.0013935	BID, DLC1, ANP32B, MUL1, SMAD3, FADD, BEX3, RPS27L, BAD, BCL2L13, PDCD2, RACK1, NOD1, VCP, ROBO1, F3, MTCH1, DIABLO, HSPE1, FAS, DAP, HSPD1, CASP1, CASP2, PDCD6	2607	83	16792	1.9401	0.999722	0.0972902	2.66257
GO:0045071~negative regulation of viral genome replication	12	0.42061	0.0371701	SRPK2, PLSCR1, ZC3HAV1, BST2, IFITM2, IFITM3, OAS3, LTF, IFI16, EIF2AK2, APOBEC3C, ADAR	2607	40	16792	1.93234	1	0.671137	51.9558
GO:0006418~tRNA aminoacylation for protein translation	12	0.42061	0.0371701	IARS, CARS, EEF1E1, SARS, AARS, HARS, FARSB, EPRS, QARS, FARSA, SARS2, PPA1	2607	40	16792	1.93234	1	0.671137	51.9558
GO:0006614~SRP-dependent cotranslational protein targeting to membrane	28	0.981423	0.000811106	RPL18, SRP14, RPL14, RPL36, RPS2, RPS3, RPL7, RPL6, RPLP0, RPL8, RPL3, RPL26L1, RPL10, RPL5, RPL4, SEC61A1, RPS27A, RPS24, RPSA, SRPRB, RPS4X, RPS5, RPS8, RPS16, RPS10, SRP72, SRP9, SSR3	2607	94	16792	1.91863	0.991475	0.061554	1.55807
GO:0032956~regulation of actin cytoskeleton organization	14	0.490712	0.0235961	DLC1, PAM, CCDC88A, TWF2, BST2, ROCK2, RHOQ, GPM6B, EPHA5, LRP1, ILK, RHOA, SH3BGRL3, CRK	2607	47	16792	1.91863	1	0.547147	37.0053
GO:0070373~negative regulation of ERK1 and ERK2 cascade	17	0.595864	0.0131971	PHB, SYNJ2BP, TIMP3, SPRY4, PIN1, SPRY2, DUSP3, FBLN1, EIF3A, RANBP9, ATF3, DUSP1, XBP1, ITGB1BP1, DMD, GSTP1, GBP1	2607	58	16792	1.88791	1	0.411793	22.6708
GO:0008543~fibroblast growth factor receptor signaling pathway	24	0.84122	0.00268064	RBFOX2, POLR2G, FGFR1, POLR2F, POLR2E, FIBP, POLR2L, NDST1, GRB2, POLR2J, PTBP1, POLR2I, IQGAP1, PTPN11, POLR2A, HNRNPM, MAPK1, HNRNPF, UBC, RAB14, SPRED2, SPRED1, FGF1, RPS27A	2607	82	16792	1.88521	1	0.155898	5.06208
GO:0006405~RNA export from nucleus	16	0.560813	0.0178752	SRSF1, CHTOP, RNPS1, NUP188, SRSF3, SARNP, POM121, EIF4E, SRSF7, SRSF6, SRSF9, CDC40, U2AF1, THOC7, RANBP1, TPR	2607	55	16792	1.87378	1	0.473706	29.465
GO:0006928~movement of cell or subcellular component	25	0.876271	0.00236064	ACTB, CAPZA2, CAPZA1, VIM, ABI2, ABI1, ARPC5, CAPZB, TPM4, STAT3, TPM3, VCL, ACTG1, ACTR3, CD9, ARPC1B, TUBB, ARPC3, ARPC2, RAC1, TXN, WASL, MSN, ARHGDIA, TUBB4B	2607	86	16792	1.87242	0.999999	0.141447	4.47084
GO:0006687~glycosphingolipid metabolic process	13	0.455661	0.0379002	ARSF, PSAP, CREM, HEXA, HEXB, ARSJ, CTSA, ASAH1, GBA2, SMPD1, ARSA, NEU1, GBA	2607	45	16792	1.86077	1	0.672943	52.6559
GO:0071363~cellular response to growth factor stimulus	13	0.455661	0.0379002	TWF2, DTYMK, SPARC, CTNNB1, RACK1, PFN1, HTRA2, SHC1, SRD5A1, CPNE3, CIB1, MAP2K5, FEZ1	2607	45	16792	1.86077	1	0.672943	52.6559
GO:0006631~fatty acid metabolic process	15	0.525762	0.024202	ALKBH7, SGPL1, C3, CREM, LYPLA2, LYPLA1, HADHA, PRKAR2B, PNPLA8, NDUFS6, CRYL1, PER2, HADH, MECR, CROT	2607	52	16792	1.85802	1	0.550326	37.7575
GO:0016197~endosomal transport	19	0.665966	0.0100685	CHMP2A, CHMP6, SNX17, VTA1, CHMP4A, DPY30, SQSTM1, RAB35, SNF8, BLOC1S1, UBC, VPS4A, SNX33, RAB13, RAB10, VPS28, VPS36, DCLK1, RPS27A	2607	66	16792	1.85426	1	0.349876	17.7855
GO:0045471~response to ethanol	30	1.05152	0.00105805	TUFM, EEF1B2, TNC, DMAP1, GOT2, PTK2B, CNR1, NQO1, SDF4, MYC, SETDB1, ICAM1, MAOB, GGH, POLB, EEF2, BAD, SPARC, SOD1, RPS4X, STAT3, NTRK3, PSMD14, TJP1, G6PD, FYN, ARSA, CA3, OGG1, GSTP1	2607	105	16792	1.84032	0.998003	0.0775564	2.02784
GO:0033138~positive regulation of peptidyl-serine phosphorylation	20	0.701016	0.00879612	CAV1, HAX1, RAF1, PINK1, TERF2IP, PARK7, NTRK3, EIF4G1, CDC42, SPRY2, BAG4, PFN2, CD44, TXN, ARAF, RIPK2, CAMK1, ANGPT1, MAD2L2, PPP1R15A	2607	70	16792	1.84032	1	0.33113	15.7162
GO:0098869~cellular oxidant detoxification	20	0.701016	0.00879612	TXNL1, SELENOW, PRDX4, PRDX5, HP, LTC4S, SELENOS, PRDX3, PARK7, MGST3, GPX1, TXNDC17, PRDX6, GPX4, GSTK1, TXN, TXNRD1, GSTO1, GSTP1, MGST1	2607	70	16792	1.84032	1	0.33113	15.7162
GO:0006139~nucleobase-containing compound metabolic process	14	0.490712	0.0327506	POLR3H, ATIC, REXO2, OAS3, AK2, DPYSL2, AK4, PRPSAP1, CMPK1, PRPS2, TK2, PRPSAP2, ERCC2, DUT	2607	49	16792	1.84032	1	0.636914	47.5034
GO:0001889~liver development	21	0.736067	0.00768584	COBL, ACADM, CADM1, ARID5B, RELA, QDPR, SMAD3, CAD, HGF, AK4, ACAT1, RHBDD3, SOD2, PKM, MAN2A1, NOTCH1, KRAS, XBP1, PKD2, PTN, SRD5A1	2607	74	16792	1.82789	1	0.304027	13.8703
GO:0006457~protein folding	51	1.78759	1.7743e-05	HSP90AB1, PDIA3, VBP1, PDIA6, CCT2, PDIA4, CCT3, CANX, AIP, BAG4, NUDCD3, NUDCD2, MKKS, GNG2, TXNL1, ERP27, AARS, ERP29, CCT6A, PDCL3, PFDN1, GNB2, GNB1, TBCA, TXNDC5, MLEC, PFDN5, TXN, FKBP14, FKBP2, TMX1, FKBP9, FKBP5, TXN2, PPIL1, FKBP1A, CALR, CDC37, TTC1, HSPE1, NUDC, CSNK2B, HSPBP1, CCT7, PPIE, ERP44, HSP90B1, CCT4, PPIA, PPIC, CCT8	2607	180	16792	1.82498	0.0989441	0.00266792	0.0343318
GO:0008380~RNA splicing	47	1.64739	4.02682e-05	LSM6, RBM15B, SNRPD3, RBM4, SNRPD1, ZCRB1, SNRPD2, WTAP, IVNS1ABP, SF3B4, SF3B2, NONO, DDX47, PPP2CA, TARDBP, CDC40, USP39, U2AF1, QKI, LSM4, SCNM1, HNRNPC, LSM1, ARL6IP4, USB1, PPP2R1A, RBFOX2, SNRPA1, SRPK2, LGALS3, EFTUD2, PTBP1, SAP18, RNPS1, MBNL1, SNURF, SUGP2, C1QBP, SRSF7, SFPQ, SNRPB, THOC7, SNRNP40, LSM10, SNRPF, SNRNP25, PUF60	2607	166	16792	1.82369	0.210582	0.00535967	0.0779007
GO:0010595~positive regulation of endothelial cell migration	13	0.455661	0.0442872	PRKCA, NRP1, ROCK2, PTK2B, ITGB1BP1, AGT, BMPR2, AAMP, ANGPT1, ATOH8, SPARC, FGF1, PDCD6	2607	46	16792	1.82032	1	0.714829	58.3818
GO:0030900~forebrain development	13	0.455661	0.0442872	DLC1, NDST1, CNP, ARID1A, VAX2, PRKG1, ATRX, NOTCH1, APP, HTRA2, FYN, NR2F2, DCLK1	2607	46	16792	1.82032	1	0.714829	58.3818
GO:0002576~platelet degranulation	29	1.01647	0.00166066	ALDOA, CYB5R1, FAM3C, CLU, TGFB3, TIMP3, APLP2, VCL, TIMP1, CD9, APP, LGALS3BP, QSOX1, ACTN4, PSAP, ACTN1, SERPING1, HGF, SPARC, CD63, SOD1, LAMP2, ABCC4, CALM3, HABP4, WDR1, PROS1, CALM2, CALM1	2607	103	16792	1.81352	0.999942	0.108472	3.16531
GO:0006369~termination of RNA polymerase II transcription	18	0.630915	0.0158667	SRSF1, CHTOP, SNRPD3, RNPS1, SRSF3, SARNP, MAZ, SRSF7, SRSF6, SRSF9, CDC40, NUDT21, U2AF1, SNRPB, THOC7, LSM10, SNRPF, SSU72	2607	64	16792	1.81157	1	0.446043	26.6204
GO:0060337~type I interferon signaling pathway	18	0.630915	0.0158667	HLA-H, BST2, IFITM2, IFITM3, OAS3, HLA-A, HLA-C, HLA-B, HLA-E, STAT1, PSMB8, IFI35, STAT2, IRF9, JAK1, GBP2, IFI6, ADAR	2607	64	16792	1.81157	1	0.446043	26.6204
GO:0006412~translation	71	2.48861	4.86899e-07	RPL18, MRPL41, RPL14, COPS5, COA1, RPS27L, RPS2, MRPS30, RPS3, EIF4EBP2, SLC25A23, RPLP0, SLC25A3, RPL26L1, RPL10, MRPL37, MRPL32, RPS27A, RPL36AL, MRPL4, MRPL51, MRPL3, SLC25A4, SLC25A5, EFTUD2, SARS, RPS4X, EIF4G1, MRPS18C, RPS16, HARS, FARSB, RPS10, SLC25A39, EIF2AK2, NHP2, MRPL43, MRPS17, MRPS15, MRPS12, MRPS11, SNU13, RPL36, MRPL20, MRPL13, MRPL15, RPL7, RPL6, RPL8, MRPL19, RPL3, MRPL18, MRP…	2607	253	16792	1.80759	0.00285499	0.000109958	0.000942272
GO:0019827~stem cell population maintenance	14	0.490712	0.0381792	MED14, FZD7, MED10, SMC3, CTNNB1, NOTCH2, PHF19, EIF4E, MED27, RTF1, LEO1, PAF1, SMC1A, LSM1	2607	50	16792	1.80351	1	0.670313	52.9209
GO:0000398~mRNA splicing, via spliceosome	62	2.17315	3.3003e-06	RALY, SRSF1, LSM6, SNRPD3, LSM7, CWC15, SNRPD1, SNRPD2, BUD31, YBX1, NONO, GPKOW, PCBP1, PCBP2, U2AF1, LSM5, LSM4, LSM2, SNRPA1, EFTUD2, PTBP1, HNRNPR, HNRNPU, SNRPB, SNRNP40, SNRPC, SNRPF, POLR2G, POLR2F, POLR2E, POLR2L, PPIL1, POLR2J, POLR2I, SNU13, ZCRB1, SF3B5, SF3B4, POLR2A, SF3B2, SF3B1, HNRNPM, HNRNPK, HNRNPF, CDC40, USP39, NUDT21, HNRNPC, DHX9, ELAVL1, RNPS1, DDX5, RBMX, SNURF, SRSF3, PPI…	2607	222	16792	1.79887	0.0191928	0.000553544	0.00638676
GO:0006368~transcription elongation from RNA polymerase II promoter	24	0.84122	0.00513319	SSRP1, POLR2G, POLR2F, POLR2E, POLR2L, TAF6, CCNH, POLR2J, TAF9B, POLR2I, GTF2H5, POLR2A, ADRM1, ELOF1, RTF1, GTF2A2, LEO1, THOC7, TAF9, TCEA1, PAF1, SUPT5H, ERCC3, ERCC2	2607	86	16792	1.79752	1	0.242131	9.47973
GO:1902600~hydrogen ion transmembrane transport	17	0.595864	0.0212783	NDUFA4, UQCRC1, COX7B, COX8A, COX4I1, CYB5A, ATP6V1G1, COX7A2L, COX5A, UQCRFS1, COX6C, UQCR10, UQCR11, COA6, UQCRH, COX6B1, COX6A1	2607	61	16792	1.79507	1	0.520144	34.0474
GO:0048208~COPII vesicle coating	17	0.595864	0.0212783	PPP6C, TRAPPC2L, RAB1B, RAB1A, PREB, SCFD1, TMED2, GRIA1, CD59, TRAPPC5, TRAPPC4, SEC13, TMED10, SEC22B, TRAPPC1, TRAPPC3, NSF	2607	61	16792	1.79507	1	0.520144	34.0474
GO:0048010~vascular endothelial growth factor receptor signaling pathway	20	0.701016	0.0120126	ACTB, NRP1, ROCK2, BMPR2, ABI1, VAV2, ELMO2, ACTG1, CDC42, PAK2, XBP1, FYN, PTK2B, ITGAV, RAC1, SULF1, RHOA, CYFIP1, BRK1, CRK	2607	72	16792	1.7892	1	0.391197	20.8546
GO:0035019~somatic stem cell population maintenance	18	0.630915	0.0184648	POLR2G, POLR2F, POLR2E, POLR2L, EPAS1, KLF10, POLR2J, POLR2I, RAF1, SMAD2, NR2E1, STAT3, VPS72, POLR2A, ZFP36L2, SALL1, PBX1, LRP5	2607	65	16792	1.78369	1	0.478696	30.2799
GO:0007050~cell cycle arrest	39	1.36698	0.000334442	HRAS, RRAGA, CALR, TCF7L2, UHMK1, BRINP2, CDKN2B, PCBP4, CDKN2C, ILK, PKD2, PRKAA1, MYC, CUL1, APC, LAMTOR5, LAMTOR4, LAMTOR1, LAMTOR2, SMAD3, TBRG4, CDK6, STRADB, GAS7, MFN2, NOTCH2, EIF4G2, PPM1G, PA2G4, CDKN1A, HEPACAM, SGSM3, RHEB, GAS2L1, PRNP, PPP1R15A, GADD45A, EIF2AK4, BARD1	2607	141	16792	1.78159	0.859728	0.0316867	0.645251
GO:0051592~response to calcium ion	16	0.560813	0.0285001	GDI1, CAV1, S100A16, BAD, SPARC, SLC25A12, PEF1, SLC25A13, DUSP1, PTK2B, CALM3, RANBP1, PDCD6, CALM2, CALM1, ADAM9	2607	58	16792	1.77686	1	0.596643	42.8542
GO:0051259~protein oligomerization	16	0.560813	0.0285001	IRAK1, MLC1, PFKL, BLM, TRIM28, SNX2, STOML2, GRHPR, PFKM, NME2, NOD1, SH3GLB1, NBR1, NPM1, CAMK2D, TMED10	2607	58	16792	1.77686	1	0.596643	42.8542
GO:0000165~MAPK cascade	72	2.52366	9.44096e-07	HRAS, NDST1, ITPKB, PSMD1, PSMD2, SHC1, ANGPT1, PSMD4, SPRED1, FGF1, MYC, PSMD7, RPS27A, PSMD8, PSMD9, ZFP36, RHBDD3, PSMA2, PSMA1, MAPK1, MAPK6, PSMA5, PSME2, PSMA4, PSMA3, UBC, PEBP1, PSME3, PSME4, PSMB10, FGFR1, CAV1, GRB2, PSMA7, RBX1, PSMB5, PSMB4, PEA15, PSMB7, PSMB6, KRAS, PSMB1, PTK2B, PSMB3, PSMB2, CAMK2D, LAMTOR2, PTPRA, YWHAB, RAF1, SMAD1, PSMB8, PSMB9, NRAS, PSMC6, PSMD14, PSMC5, PSMD…	2607	262	16792	1.77008	0.0055284	0.000191145	0.00182706
GO:0007005~mitochondrion organization	21	0.736067	0.0121219	EPAS1, SSBP1, HAX1, PHB, CYCS, CHCHD2, PINK1, STOML2, TMEM11, BCS1L, PRDX3, CXADR, SELENON, PARK7, EIF4G1, MAN2A1, HTRA2, PHB2, RAB29, PARP1, GBA	2607	77	16792	1.75667	1	0.391845	21.0239
GO:0019882~antigen processing and presentation	15	0.525762	0.0381165	HLA-H, RAB5B, RAB4A, HLA-A, FCGRT, HLA-C, HLA-B, HLA-E, PSMB8, AZGP1, RAB35, RAB34, RAB6A, MR1, RAB10	2607	55	16792	1.75667	1	0.67148	52.8615
GO:0019886~antigen processing and presentation of exogenous peptide antigen via MHC class II	25	0.876271	0.00604469	RAB7A, AP1M1, CLTA, AP1B1, AP2S1, LGMN, CLTC, CANX, AP1S2, DYNLL1, KLC1, KIFAP3, AP2M1, KIF3B, DCTN6, DCTN3, DCTN4, KIF3C, DCTN1, DCTN2, ARF1, SEC13, CTSD, SH3GL2, DYNC1I2	2607	92	16792	1.7503	1	0.264287	11.0713
GO:0007584~response to nutrient	20	0.701016	0.0160975	SLC8A1, LDHA, AHCY, TXN2, TGFBR2, HAT1, COX4I1, ENSA, STAT1, POR, PKM, HSF1, CNR1, ARSA, DAD1, GNPAT, IGFBP2, NQO1, ACSL3, ERCC1	2607	74	16792	1.74084	1	0.448759	26.9527
GO:0060333~interferon-gamma-mediated signaling pathway	19	0.665966	0.0213405	ICAM1, HLA-H, NMI, OAS3, HLA-A, HLA-C, HLA-B, HLA-E, STAT1, TRIM21, B2M, IRF9, CD44, MT2A, CAMK2D, JAK1, IFNGR2, GBP2, GBP1	2607	71	16792	1.72368	1	0.517115	34.1285
GO:0007160~cell-matrix adhesion	24	0.84122	0.00920925	EPDR1, NPNT, CD63, SRF, ITGB1, CDK5, VCL, CTNNB1, MKLN1, CD44, SORBS1, ITGB8, CD34, ITGB1BP1, ITGAV, FBLN5, RAC1, ILK, ITGA7, SGCE, ZYX, EMP2, JAM3, ADAM9	2607	90	16792	1.71763	1	0.337391	16.3935
GO:0045732~positive regulation of protein catabolic process	16	0.560813	0.037795	RAB7A, NDFIP1, SNX1, NDUFA13, RHBDD3, OAZ2, DACT1, OAZ1, VCP, LPCAT1, SNF8, SEC22B, VPS28, NSF, BARD1, APC	2607	60	16792	1.71763	1	0.673713	52.5557
GO:0045669~positive regulation of osteoblast differentiation	16	0.560813	0.037795	ATRAID, IL6ST, ATP6AP1, NPNT, FAM20C, BMPR2, CD276, CLIC1, HGF, SMAD1, GLI3, GDPD2, CTNNB1, ILK, LTF, ID4	2607	60	16792	1.71763	1	0.673713	52.5557
GO:0006914~autophagy	35	1.22678	0.00180187	CHMP2A, HMGB1, TOLLIP, CHMP4A, CHMP6, RAB1B, RAB1A, MVB12A, SRPX, XBP1, SH3GLB1, SQSTM1, MAP1LC3B, TMEM59, SNF8, VPS4A, USP10, VMP1, DAP, VPS36, TM9SF1, BECN1, VTA1, TMBIM6, TECPR2, VPS41, IFI16, PARK7, TMEM208, VCP, ULK3, ARSA, CTSD, VPS28, C19ORF12	2607	133	16792	1.69503	0.999975	0.115861	3.43003
GO:0001933~negative regulation of protein phosphorylation	16	0.560813	0.043181	CTDSPL, IMPACT, CD109, PRKDC, FKBP1A, WWTR1, MYADM, PLPP3, PARK7, NTRK3, FBLN1, TARDBP, CTDSP2, ANGPT1, PRNP, CIB1	2607	61	16792	1.68947	1	0.708952	57.4395
GO:0043087~regulation of GTPase activity	17	0.595864	0.0372779	RAB3GAP2, FGD1, STMN3, PLXNB2, IQGAP2, RDX, DYNLT1, SOD1, VAV2, PRKG1, IQGAP1, EPHA5, BVES, GAPVD1, ITGB1BP1, BCL6, CRK	2607	65	16792	1.6846	1	0.670392	52.0597
GO:0043627~response to estrogen	17	0.595864	0.0372779	CAV1, LDHA, TGFBR2, DTYMK, TGFB3, RCAN1, GLI3, CITED1, ARPC1B, MAPK1, CYP27B1, ARSA, SRD5A1, HSPD1, CA2, IGFBP2, GBA	2607	65	16792	1.6846	1	0.670392	52.0597
GO:0042147~retrograde transport, endosome to Golgi	18	0.630915	0.0322249	VPS29, RAB7A, RAB9A, PLEKHJ1, SNX5, SNX2, TRIM27, SNX1, VTI1B, DENND2A, CLTC, DCTN1, GBF1, RAB29, VPS26B, VPS26A, YKT6, RHOBTB3	2607	69	16792	1.68029	1	0.632773	46.9484
GO:0043154~negative regulation of cysteine-type endopeptidase activity involved in apoptotic process	18	0.630915	0.0322249	ARL6IP1, LAMTOR5, HERPUD1, RAF1, PRDX5, BEX3, PRDX3, HGF, YWHAE, POR, GPX1, GPI, TRIAP1, SERPINB9, DDX3X, CD44, IFI6, MAP2K5	2607	69	16792	1.68029	1	0.632773	46.9484
GO:0000184~nuclear-transcribed mRNA catabolic process, nonsense-mediated decay	31	1.08658	0.00404014	RPL18, RPL14, RPL36, PYM1, RPS2, UHMK1, RPS3, EXOSC10, RPL7, RPL6, RPLP0, PPP2CA, RPL8, RPL3, RPL26L1, RPL10, RPL5, RPL4, RPS27A, RPS24, PPP2R1A, RPSA, RNPS1, RPS4X, ETF1, RPS5, RPS8, EIF4G1, RPS16, GSPT1, RPS10	2607	119	16792	1.67794	1	0.204333	7.53552
GO:0006886~intracellular protein transport	61	2.1381	5.09001e-05	RAB3GAP2, CLTA, CLTB, AP1B1, TIMM17A, AP2S1, TIMM17B, AP3S1, CLTC, COPB2, CTTN, AP1S2, COPB1, ANKRD50, SAR1A, KDELR1, RAMP1, NSF, KDELR2, MYO6, ZP3, RAN, VPS45, ERP29, VPS41, WLS, CDK5, BCAP31, SEC61B, SGSM3, IPO5, ARCN1, TOMM22, VPS26B, VPS26A, SEC23B, VPS29, COPZ2, AP1M1, ARFGAP3, SNX5, SNX17, COPZ1, SNX2, SNX1, CTSA, STX12, TMED2, KLC1, STX17, NPM1, BCAP29, TMED10, SCG5, AP2M1, IPO13, SELENOS,…	2607	236	16792	1.66487	0.258361	0.00647661	0.0984589
GO:0010976~positive regulation of neuron projection development	23	0.806169	0.0158008	FGFR1, TWF2, PLXNB2, UBE2V2, SNX3, GPRC5B, RGMA, DDX56, NME2, NDRG4, NME1, FYN, PTK2B, DMD, CNR1, PTN, RAP1A, CAMK1, RANBP1, NFE2L2, TMEM30A, CAMK1D, FEZ1	2607	89	16792	1.66456	1	0.446735	26.5252
GO:0007517~muscle organ development	23	0.806169	0.0158008	SRI, POU6F1, AEBP1, ACHE, FOXK1, FHL1, MRAS, COPRS, FHL3, CHODL, PAXBP1, CD164, BVES, XBP1, LAMA5, DMD, ITGA7, VAMP5, ETV1, SGCE, TCF12, UNC45A, SGCB	2607	89	16792	1.66456	1	0.446735	26.5252
GO:0006511~ubiquitin-dependent protein catabolic process	47	1.64739	0.0004171	USP7, USP8, TOLLIP, USP5, UBE2G2, UCHL1, BAP1, PINK1, RFFL, PSMA7, STUB1, UBE2D3, BAG6, UBE2D2, XBP1, SQSTM1, USP11, USP10, PSMD4, RANBP1, FBXO21, USP33, USP14, CUL1, FBXO7, PSMD9, HERPUD1, UBE2A, SKP2, UBE2I, UBE2H, UBE2L3, PSMA2, UBE2N, PSMA1, ADRM1, PSMC6, PSMD14, PSMD13, VCP, PSMD11, PSMA4, PSMC2, PSMA3, USP20, UCHL3, USP22	2607	182	16792	1.66337	0.913682	0.0375536	0.804115
GO:0000902~cell morphogenesis	16	0.560813	0.0490886	CSNK1A1, PSMB10, CAP2, SHROOM3, LIPA, PDPN, CLU, HGF, STRADB, TENM4, SS18, SCFD1, BCL6, CAP1, SLC39A3, ADD1	2607	62	16792	1.66222	1	0.743864	62.2469
GO:0006396~RNA processing	25	0.876271	0.011948	DHX9, CHERP, RBM3, SNRPD3, LSM7, RBM4, GRSF1, SNRPD1, SSB, HNRNPDL, BICD1, HNRNPU, ADAT1, EXOSC10, SUGP2, HNRNPK, DHX29, HNRNPF, LSM4, DHX36, SNRNP40, DHX30, XRN2, ADAR, RBMS1	2607	97	16792	1.66008	1	0.391678	20.7544
GO:0007265~Ras protein signal transduction	18	0.630915	0.0366136	SETDB1, HRAS, GRB2, MRAS, TRIM28, G3BP1, G3BP2, RFXANK, PARK7, NRAS, CDKN1A, KRAS, GNB1, RALB, DNMT1, RALA, SDCBP, SHC1	2607	70	16792	1.65629	1	0.669189	51.4155
GO:0030308~negative regulation of cell growth	31	1.08658	0.00523368	DCBLD2, FOXK1, CCDC85B, FHL1, BMPR2, PPT1, RACK1, CYP27B1, DDX3X, CDKN2C, AGT, PPP2CA, BCL6, GNG4, NDUFS3, SERTAD1, ENO1, PPP2R1A, HYAL2, BST2, PHB, PSRC1, NDUFA13, MUL1, SMAD3, ADIPOR1, RBBP7, CDKN1A, EI24, GAS2L1, SMARCA2	2607	121	16792	1.6502	1	0.244305	9.65652
GO:0050900~leukocyte migration	30	1.05152	0.0109531	ATP1B1, HRAS, CAV1, ATP1B2, GRB2, SLC7A8, CXADR, ITGB1, CD47, KRAS, CD44, ITGAV, PDE4B, ANGPT1, SHC1, MSN, ICAM1, BSG, PODXL, SLC3A2, PTPN11, NRAS, CD34, PPIA, FYN, CD58, COL1A2, JAM2, PROS1, JAM3	2607	122	16792	1.58388	1	0.36994	19.1958
GO:0009615~response to virus	27	0.946372	0.0165233	ZC3HAV1, IFITM2, IFITM3, CLU, OAS3, IVNS1ABP, BANF1, MYD88, DDX3X, PRKRA, DHX36, IFNGR2, DCLK1, ENO1, BATF3, LAMTOR5, HYAL2, BST2, DDX1, IFI44, CDK6, PSMA2, XPR1, CFL1, EEF1G, EIF2AK2, ADAR	2607	110	16792	1.581	1	0.455382	27.562
GO:0032355~response to estradiol	22	0.771118	0.0369772	BID, PAM, CST3, OXTR, EEF2, BAD, CALR, STAT3, RBBP8, CTNNB1, GPI, NCOA1, DUSP1, TFPI, PTN, PTCH1, IGFBP2, OGG1, NR2F2, NQO1, MYC, GSTP1	2607	91	16792	1.55719	1	0.671031	51.7691
GO:0042981~regulation of apoptotic process	51	1.78759	0.00144637	STEAP3, TGFB3, PRDX2, RPS3, MAGED1, TRIAP1, TP53I3, CASP4, NOD1, FAS, CASP1, CASP2, SGK1, ACTN4, NOS1AP, ANP32E, SKP2, ACTN1, FADD, BCL2L13, CDK5, DAPK3, NME4, NME3, CARD16, NME1, SERBP1, CTSB, EIF2AK2, BID, TNFRSF21, HAX1, MCL1, TMEM219, BCL2L1, CALR, TNFRSF1A, PEA15, BCL6, LGALS1, PHB, SRA1, RAF1, TRIM24, STAT1, PRELID1, VCP, DUSP1, FYN, GDF11, LRP5	2607	213	16792	1.54224	0.999796	0.0984582	2.76225
GO:0008360~regulation of cell shape	33	1.15668	0.0139537	ALDOA, DLC1, RHOJ, FGD1, SHROOM3, HEXB, RHOQ, RDX, LPAR1, RHOU, MKLN1, CDC42EP1, PTK2B, WIPF3, PTN, MSN, ARHGDIA, CSNK1A1, CDC7, ICAM1, PDPN, PLXNB2, MYL12B, MYL12A, DAPK3, S100A13, BVES, FYN, CDC42SE2, ITGA7, CYFIP1, WDR1, PARVA	2607	140	16792	1.51826	1	0.416844	23.8101
GO:0015031~protein transport	93	3.25973	2.75071e-05	RAB9A, RAB5B, CHMP6, ZMAT3, UNC50, USE1, RAB1B, TIMM50, MVB12A, GBF1, SEH1L, RAB29, GOPC, RANBP3, VPS4A, CALCRL, JAGN1, RAMP1, SCAMP4, GPR89A, SCAMP5, KDELR2, SCAMP3, SCAMP2, ACTN4, NBAS, RAB4A, SENP2, ADAMTS9, CHMP1A, CHMP1B, RAB18, ITGB1BP1, ARCN1, RAB14, RAB5A, COMMD1, SERP2, SNX10, COPE, SERP1, VPS29, CHMP2A, COPZ2, RAB7A, AP1M1, BBS7, RAB3D, BBS9, COPZ1, PPT1, GPM6B, DENND2A, SNX3, ARF5, TIM…	2607	395	16792	1.51652	0.149154	0.00402995	0.0532199
GO:0001701~in utero embryonic development	44	1.54224	0.00444884	SRSF1, FGFR1, TGFB3, YBX3, KEAP1, BCL2L1, SOX8, GLI3, ITGB1, SRF, YBX1, CTNNB1, PRMT1, BTF3, BRK1, TCTN1, ANGPT1, INPP5B, MYC, SLC39A3, RTCB, ERCC2, FLVCR1, SLC39A1, MAFF, UBE2A, CCM2, ADAM10, MYO1E, TGFBR2, SMAD3, SMAD2, MBNL1, MAN2A1, GPI, NOTCH1, DUSP3, TANC2, ZMIZ1, EIF2S2, PTCH1, EIF4E2, ADD1, ADAR	2607	187	16792	1.51556	1	0.218859	8.26707
GO:0000086~G2/M transition of mitotic cell cycle	32	1.12163	0.0176289	HAUS1, ENSA, PRKAR2B, TUBB, DYNLL1, CDKN2B, PRKACA, TUBA1A, FBXW11, CUL1, RPS27A, TUBB4B, PHLDA1, PPP2R1A, NES, CCNH, ARPP19, SKP2, DCTN3, PCM1, YWHAE, PPP1CB, DCTN1, DCTN2, CDKN1A, PLK3, UBC, CALM3, MAPRE1, CALM2, DYNC1I2, CALM1	2607	137	16792	1.5045	1	0.471034	29.1219
GO:0043065~positive regulation of apoptotic process	70	2.45356	0.000386619	TSPO, LDHA, PNMA2, ZMAT3, TGFB3, LPAR1, PDCD2, CTNNB1, PRMT2, HTRA2, PSENEN, FAS, CASP2, ANO6, RPS27A, ARHGEF3, ARHGEF6, FADD, CDK4, DAPK3, NCOA1, C1QBP, PSEN2, MLLT11, UBC, RIPK2, CLIP3, GADD45A, CAMK1D, PNMA1, BID, HMGB1, FGD1, TNFRSF12A, SAV1, CLU, PRKDC, BCL2L1, STK17A, ZBTB16, ITGB1, RACK1, MTCH2, DDX3X, SQSTM1, CNR1, MTCH1, RAC1, PTN, DIABLO, BCL6, ERCC3, ARL6IP5, APC, PTPA, SAP18, RNPS1, B…	2607	300	16792	1.50293	0.896757	0.0359611	0.74556
GO:0019083~viral transcription	26	0.911321	0.0356467	RPL18, RPSA, RPL14, RPL36, NUP188, RPS2, RPS4X, RPS5, RPS8, RPS3, POM121, RPS16, RPL7, SEH1L, RPL6, RPLP0, RPL8, RPL3, RPL26L1, RPL10, RPL5, RPS10, RPL4, TPR, RPS27A, RPS24	2607	112	16792	1.49526	1	0.662924	50.4631
GO:0001649~osteoblast differentiation	24	0.84122	0.046714	DHX9, RRBP1, PHB, TNC, MRC2, CCDC47, LRRC17, CLTC, WWTR1, SOX8, RBMX, TPM4, CBFB, HNRNPU, IARS, SND1, PSMC2, BCAP29, COL6A1, H3F3A, HSPE1, HNRNPC, SPP1, ADAR	2607	104	16792	1.48641	1	0.732562	60.38
GO:0042493~response to drug	70	2.45356	0.000571794	XRCC5, SRP14, TSPO, LDHA, UQCRFS1, CTNNB1, B2M, TOP1, SLC1A2, SLC1A3, GNPAT, SRD5A1, RPN2, HADH, MYC, PMS1, ICAM1, MYO6, RELA, CST3, FOSB, NDUFA10, CDK4, POR, SS18, SRP72, AOC1, PAM, TXN2, OXTR, ABCA2, COMT, TIMP2, CALR, CDH3, MDK, HADHA, PTK2B, DAD1, ABCD3, PTN, NFATC2, APEX1, LPL, SLC8A1, BECN1, LGALS1, MAOB, TGFBR2, GGH, FZD3, ATP1A1, DPYSL2, BAD, AK4, STAT1, SOD1, STAT3, SOD2, TJP1, CDKN1A, F…	2607	304	16792	1.48315	0.965214	0.0481904	1.10078
GO:0006397~mRNA processing	41	1.43708	0.00971674	SRSF1, AURKAIP1, RBM15B, RBM4, HNRNPLL, WTAP, SF3B4, SF3B2, NONO, DDX47, TARDBP, NUDT21, USP39, U2AF1, LSM5, QKI, SCNM1, PRKACA, LSM1, ARL6IP4, TSEN15, TSEN34, USB1, RBFOX2, RBM23, LGALS3, EFTUD2, PTBP1, SAP18, MBNL1, HNRNPR, SUGP2, C1QBP, SRSF7, SFPQ, SRSF9, THOC7, LSM10, XRN2, PUF60, ADAR	2607	179	16792	1.47534	1	0.34604	17.2183
GO:0007264~small GTPase mediated signal transduction	56	1.96285	0.00277106	RHOJ, HRAS, RAB9A, RAB5B, RHOQ, RAB1B, RAB1A, RGL1, CDC42, ARL5A, DIRAS3, MFHAS1, RAB29, ARHGAP1, IFT22, RHOA, RHOC, RAB6A, ARL2, RAN, RAB4A, SRPRB, GEM, ARL3, RAB18, RAB5A, RAB14, ARL8A, RAB13, RAB10, ARL4A, RAB7A, HACD3, RAB3D, MRAS, ARF5, KRAS, RAC1, RAB11B, RAB11A, RHOBTB3, RAB2A, GDI1, GDI2, VAV2, NRAS, RAB31, ARF1, ARF3, RAB35, RAB34, ARF4, YWHAQ, RHEB, RAP1A, RAP1B	2607	246	16792	1.46627	1	0.156109	5.22853
GO:0001666~response to hypoxia	39	1.36698	0.0137833	PAM, ATP1B1, CAV1, LDHA, AHCY, TXN2, TGFB3, ADORA1, SRF, PKM, HMOX2, PLOD1, MYOCD, PTK2B, CAMK2D, PRKAA1, CASP1, TM9SF4, ERCC3, ERCC2, PLAT, EPAS1, ACTN4, BECN1, TGFBR2, CST3, SMAD3, RAF1, BAD, CAPN2, AGTRAP, ITPR2, SOD2, HSP90B1, SCFD1, HIF1A, PSEN2, HSPD1, PLAU	2607	172	16792	1.46049	1	0.417092	23.555
GO:0006897~endocytosis	31	1.08658	0.0351597	RAB7A, HRAS, LDLR, SNX2, CYTH2, EEA1, BCL2L1, RAB1A, CDC42, APP, WIPF3, USP33, EHD2, MYO6, BECN1, MYO1E, MRC2, DENND1A, DPYSL2, MARCH3, GAPVD1, NME1, RAB5A, SORT1, USP20, RIN1, SNX33, SNX10, SH3GL1, EPN2, LRP5	2607	139	16792	1.43651	1	0.659663	49.9767
GO:0043066~negative regulation of apoptotic process	100	3.50508	0.000223408	IL6ST, NR2E1, ADORA1, MYD88, CD44, KIFAP3, RGN, FAS, DDAH2, NQO1, HIGD1A, RPS27A, CIB1, SOCS3, RELA, PA2G4, NME2, TXNDC5, RIPK2, EIF2AK2, HIGD2A, ZFAND6, ARL6IP1, HAX1, MCL1, TAF9B, PPT1, BCL2L1, SOX8, TIMP1, HNRNPK, DDX3X, NPM1, GLO1, TAF9, ARHGDIA, LAMTOR5, SPHK2, BECN1, SMAD3, TAX1BP1, NOTCH2, CDKN1A, HDAC3, PLK3, CD59, ARF4, HSPD1, ADAR, YBX3, PRDX5, PRDX2, PRDX3, GLI3, BAG4, TRIAP1, SPRY2, B…	2607	455	16792	1.41563	0.730718	0.0244508	0.431467
GO:0007568~aging	36	1.26183	0.0310129	TSPO, LITAF, GRB2, TGFB3, CNP, TIMP2, CANX, GLRX2, TIMP1, ATP2B1, HTRA2, AGT, DMD, CNR1, RGN, RPN2, NQO1, CASP2, APEX1, ERCC2, IRAK1, SLC12A2, RELA, TGFBR2, PDE4D, POLB, EEF2, SERPING1, SOD1, STAT3, LRP1, DLD, NFE2L2, OGG1, IGFBP2, CARM1	2607	165	16792	1.40534	1	0.622294	45.6478
GO:0008283~cell proliferation	79	2.76902	0.00180796	TUSC2, XRCC5, PTGES3, MORF4L1, TSPO, HRAS, DTYMK, UCHL1, HLCS, ZEB1, PRDX1, CITED1, LARP1, SBDS, GAB1, ILK, GNG2, FGF1, MYC, CUL1, GNL3, PDXK, BST2, PDPN, SKP2, VTI1B, IFI16, RBBP7, CDK5, MRM2, TACC1, DCTN2, OGFOD1, GLUL, PA2G4, DNPH1, GNB1, CD34, CD81, TXN, TXNRD1, MAPRE2, MAPRE1, EMP2, EMP1, BCAT1, ACHE, CDV3, USP8, NDP, CSF1, ELN, PRKDC, UBE2V2, BCL2L1, TCF7L2, PDAP1, ZFP36L2, CSE1L, CKLF, RAC…	2607	366	16792	1.3903	0.999976	0.114973	3.44142
GO:0006915~apoptotic process	120	4.2061	0.000261199	DLC1, TSPO, MRPL41, CADM1, RNF216, CITED1, MRPS30, ATCAY, GHITM, MYD88, RALB, DAP, FAS, CUL1, BCL7C, CIB1, BCL7B, CST3, FADD, BCL2L13, MAPK1, NME3, RIPK2, NEK6, ZFAND6, ARL6IP1, LITAF, C6ORF120, RRAGA, TMEM219, STK17A, RFFL, PRUNE2, PEA15, PEG10, UBE2D3, CSE1L, MTCH1, DIABLO, PPP2R2B, BECN1, LGALS1, TGFBR2, SRA1, CHI3L1, MUL1, TAX1BP1, VDAC1, NOTCH2, SEMA6A, EI24, PLK3, CSRNP1, C19ORF12, PDCD5, P…	2607	567	16792	1.3632	0.78432	0.0270204	0.504278
GO:0006364~rRNA processing	45	1.57729	0.0285058	RPL18, UTP4, RPL14, SNU13, RPL36, RPS27L, RPS2, RPS3, EXOSC10, DCAF13, IMP3, SBDS, DDX47, WDR18, RPL7, RPL6, RPLP0, RPL8, RPL3, RPL26L1, RPL10, RPL5, RPL4, IMP4, RPS27A, RPS24, RPSA, RRP1, RRP36, EXOSC4, RRP8, GTF2H5, RPS4X, RPS5, PWP2, MRM2, RPS8, DDX56, PA2G4, RPS16, NOP58, RPS10, XRN2, WDR46, RPP40	2607	214	16792	1.35444	1	0.594765	42.8607
GO:0006810~transport	72	2.52366	0.00832433	ABCF2, SLC20A1, ATP1B2, UNC50, PITPNB, SLC7A8, AQP4, ATP2B1, ATCAY, ACBD3, BAG6, SLC25A3, SLC4A4, FLVCR1, TM9SF2, SLC25A4, SLC33A1, SLC25A5, G3BP1, G3BP2, BICD1, TRAPPC4, MFSD10, MFSD12, SLC25A39, TRAPPC1, DYNLRB1, SRI, AP1M1, ABCA2, ENSA, STAU2, OSCP1, SFT2D2, TMED7, PEA15, TMED4, SLC35B1, SYPL1, OAZ1, TMED5, MTCH2, TMED2, TMED3, SLC35F1, MTCH1, SLC35F2, SEC22B, TMED10, AP2M1, LAPTM4B, LAPTM4A, …	2607	348	16792	1.33265	1	0.320567	14.9365
GO:0010628~positive regulation of gene expression	52	1.82264	0.0483868	HRAS, LDLR, CITED1, RPS3, CDC42, SPRY2, FUBP3, GSN, QKI, MSN, MYC, SRPK2, ACTA1, NOS1AP, ROCK2, ERP29, CDK6, HNRNPU, SERPINB9, HIF1A, PIAS3, CD34, NFE2L2, LIMS1, CAV1, TADA3, CSF1, TNC, VIM, RDX, CALR, CDH3, DROSHA, KRAS, DDX3X, TMED2, ITGB8, SNF8, UBAP2L, PRKAA1, TERF2, GBA, PHB, SMAD3, SMAD1, PARK7, STAT3, NTRK3, PLSCR1, FBLN1, DNMT1, PDCD5	2607	262	16792	1.27839	1	0.740317	61.7039
GO:0055114~oxidation-reduction process	116	4.0659	0.00538144	LDHB, LDHA, ALDH1L1, VKORC1L1, PGD, GLDC, PLOD1, AKR7A2, SMOX, SCD5, NQO1, HIGD1A, TXNL1, QDPR, TECR, POR, MOXD1, OGFOD1, SCCPDH, PYCR2, ASPHD1, HIGD2A, TMX1, HSD17B10, PAM, CYP51A1, FDX1, TXN2, GSTK1, MAOB, FOXRED2, CRYZ, P4HTM, SELENON, TXNDC12, TXNDC17, DIO2, CRYZL1, CYB5R3, TM7SF2, STEAP3, CYB5R1, PTGES2, UQCRC1, ENOX2, PDIA3, PRDX4, PRDX5, PRDX2, HSD11B1L, PRDX1, FAR1, NDUFS7, MTHFD1, TDO2, …	2607	592	16792	1.26211	1	0.244518	9.91587
GO:0008285~negative regulation of cell proliferation	76	2.66386	0.0359673	DLC1, RARRES3, HRAS, CHERP, IGFBP7, TGFB3, BAP1, COPS8, ZEB1, CNOT7, GLI3, ADORA1, CTNNB1, SPRY2, AZGP1, CDKN2B, HSF1, MYOCD, CDKN2C, KIFAP3, BRD7, CUL1, CIB1, CTBP1, RBBP4, CDK6, CD164, PTHLH, DDR1, EIF2AK1, NME1, ITGB1BP1, BTG3, RNF139, PMP22, EIF2AK2, EMP3, SMARCA2, HIST1H2AC, ABI1, ZBTB16, TIMP2, SRF, ARID2, CD9, CYP27B1, SMARCB1, PTK2B, NPM1, PRKRA, PKD2, BCL6, QSOX1, APC, TAF6, BECN1, KLF10…	2607	396	16792	1.23617	1	0.664401	50.7809

## Sheet: GO Cluster 6
Cluster 6 - Gene ontology results
GO term - Biological Process	Count	%	PValue	Genes	List Total	Pop Hits	Pop Total	Fold Enrichment	Bonferroni	Benjamini	FDR
GO:1904851~positive regulation of establishment of protein localization to telomere	9	0.31679	1.88548e-06	CCT7, CCT5, TCP1, CCT4, DKC1, WRAP53, CCT8, CCT2, CCT6A	2504	9	16792	6.70607	0.00928786	0.000139263	0.00358425
GO:0030174~regulation of DNA-dependent DNA replication initiation	5	0.175994	0.00216996	NBN, TICRR, WRNIP1, TEX10, CDT1	2504	5	16792	6.70607	0.999979	0.0770957	4.04548
GO:0034184~positive regulation of maintenance of mitotic sister chromatid cohesion	5	0.175994	0.00216996	SLF2, SLF1, SMC5, H2AFY, NSMCE2	2504	5	16792	6.70607	0.999979	0.0770957	4.04548
GO:1904871~positive regulation of protein localization to Cajal body	8	0.281591	1.12968e-05	CCT7, CCT5, TCP1, CCT4, CCT8, CCT2, CCT3, CCT6A	2504	8	16792	6.70607	0.0543742	0.000725819	0.0214731
GO:0061086~negative regulation of histone H3-K27 methylation	4	0.140795	0.0117561	PHF1, MTF2, H2AFY, SUPT6H	2504	4	16792	6.70607	1	0.281545	20.133
GO:0007091~metaphase/anaphase transition of mitotic cell cycle	4	0.140795	0.0117561	CDC23, BUB1B, TACC3, CDC27	2504	4	16792	6.70607	1	0.281545	20.133
GO:0046602~regulation of mitotic centrosome separation	4	0.140795	0.0117561	CEP85, KIF11, NEK2, CHEK1	2504	4	16792	6.70607	1	0.281545	20.133
GO:0045132~meiotic chromosome segregation	4	0.140795	0.0117561	WAPL, SGO1, SMC2, SMC4	2504	4	16792	6.70607	1	0.281545	20.133
GO:0006564~L-serine biosynthetic process	4	0.140795	0.0117561	SHMT2, PHGDH, PSAT1, PSPH	2504	4	16792	6.70607	1	0.281545	20.133
GO:0090666~scaRNA localization to Cajal body	4	0.140795	0.0117561	TCP1, CCT4, WRAP53, CCT2	2504	4	16792	6.70607	1	0.281545	20.133
GO:0007079~mitotic chromosome movement towards spindle pole	4	0.140795	0.0117561	DLGAP5, KATNB1, CENPE, KPNB1	2504	4	16792	6.70607	1	0.281545	20.133
GO:0031577~spindle checkpoint	4	0.140795	0.0117561	TAOK1, BIRC5, SPDL1, AURKB	2504	4	16792	6.70607	1	0.281545	20.133
GO:0071034~CUT catabolic process	4	0.140795	0.0117561	DIS3, EXOSC10, EXOSC2, EXOSC3	2504	4	16792	6.70607	1	0.281545	20.133
GO:0045876~positive regulation of sister chromatid cohesion	4	0.140795	0.0117561	RAD21, DDX11, SFPQ, FEN1	2504	4	16792	6.70607	1	0.281545	20.133
GO:0051572~negative regulation of histone H3-K4 methylation	4	0.140795	0.0117561	KDM1A, H2AFY, BCOR, BRCA1	2504	4	16792	6.70607	1	0.281545	20.133
GO:0034501~protein localization to kinetochore	9	0.31679	8.18401e-06	CDK1, KNL1, MTBP, TTK, BUB1B, SPDL1, AURKB, MIS12, ZW10	2504	10	16792	6.03546	0.0396936	0.000547186	0.0155567
GO:0045899~positive regulation of RNA polymerase II transcriptional preinitiation complex assembly	8	0.281591	4.42365e-05	PSMC6, PSMC5, PSMC4, PSMC3, PSMC2, CREB1, PSMC1, CAND1	2504	9	16792	5.96095	0.196623	0.00254248	0.0840604
GO:0000070~mitotic sister chromatid segregation	22	0.774375	2.80062e-14	KIFC1, CEP57L1, NEK2, DSN1, NUSAP1, KIF18B, NDC80, ESPL1, KNSTRN, MIS12, SMC4, ZNF207, MAD2L1, CEP57, PLK1, CENPA, SPAG5, ZWINT, NSL1, SMC1A, BUB3, ZW10	2504	25	16792	5.90134	1.38461e-10	6.92302e-12	5.31908e-11
GO:0000467~exonucleolytic trimming to generate mature 3'-end of 5.8S rRNA from tricistronic rRNA transcript (SSU-rRNA, 5.8S rRNA, LSU-rRNA)	7	0.246392	0.000232707	EXOSC8, EXOSC9, EXOSC2, ERI1, EXOSC3, ERI2, ERI3	2504	8	16792	5.86781	0.683932	0.0111202	0.44145
GO:2000781~positive regulation of double-strand break repair	7	0.246392	0.000232707	TIMELESS, DDX11, SLF2, FOXM1, SLF1, MGMT, SPIDR	2504	8	16792	5.86781	0.683932	0.0111202	0.44145
GO:0006271~DNA strand elongation involved in DNA replication	13	0.457585	3.44129e-08	GINS1, GINS2, GINS3, GINS4, POLA1, POLA2, PRIM1, POLD3, RFC3, RFC4, POLD1, PRIM2, POLD2	2504	15	16792	5.81193	0.000170295	3.3394e-06	6.5419e-05
GO:1900264~positive regulation of DNA-directed DNA polymerase activity	6	0.211193	0.00118245	RFC5, RFC3, RFC4, RFC2, CHTF18, DSCC1	2504	7	16792	5.74806	0.997136	0.0468616	2.22407
GO:1901838~positive regulation of transcription of nuclear large rRNA transcript from RNA polymerase I promoter	6	0.211193	0.00118245	DDX11, SMARCB1, NOL11, MTOR, NCL, SMARCA4	2504	7	16792	5.74806	0.997136	0.0468616	2.22407
GO:0071168~protein localization to chromatin	5	0.175994	0.00573897	WAPL, RAD21, PLK1, EZH2, ESCO2	2504	6	16792	5.58839	1	0.163078	10.3639
GO:0071035~nuclear polyadenylation-dependent rRNA catabolic process	5	0.175994	0.00573897	EXOSC10, EXOSC8, EXOSC9, EXOSC2, EXOSC3	2504	6	16792	5.58839	1	0.163078	10.3639
GO:0006999~nuclear pore organization	5	0.175994	0.00573897	NUP133, NUP98, SEH1L, NUP54, TPR	2504	6	16792	5.58839	1	0.163078	10.3639
GO:0045842~positive regulation of mitotic metaphase/anaphase transition	5	0.175994	0.00573897	DLGAP5, NSMCE2, ESPL1, RB1, ANAPC11	2504	6	16792	5.58839	1	0.163078	10.3639
GO:0046600~negative regulation of centriole replication	5	0.175994	0.00573897	TRIM37, CDK5RAP2, RBM14, BRCA1, MDM1	2504	6	16792	5.58839	1	0.163078	10.3639
GO:0006270~DNA replication initiation	26	0.915171	2.25059e-15	CDC7, CDC6, POLE, SLF1, GINS4, POLA1, TOPBP1, MCM2, CDC34, POLA2, MCM3, MCM10, MCM4, MCM5, MCM6, PRIM1, CCNE2, CCNE1, CDC45, MCM7, PRIM2, ORC5, ORC6, LRWD1, ORC1, ORC3	2504	32	16792	5.44868	1.0989e-11	6.86784e-13	4.21885e-12
GO:0032876~negative regulation of DNA endoreduplication	4	0.140795	0.0261352	SMC1A, SMC3, STAG2, MRE11	2504	5	16792	5.36486	1	0.479027	39.5551
GO:0000727~double-strand break repair via break-induced replication	4	0.140795	0.0261352	CDC7, GINS2, CDC45, GINS4	2504	5	16792	5.36486	1	0.479027	39.5551
GO:0070345~negative regulation of fat cell proliferation	4	0.140795	0.0261352	E2F1, GATA2, E2F3, TFDP1	2504	5	16792	5.36486	1	0.479027	39.5551
GO:0010032~meiotic chromosome condensation	4	0.140795	0.0261352	SMC2, NCAPD3, SMC4, NCAPD2	2504	5	16792	5.36486	1	0.479027	39.5551
GO:0007023~post-chaperonin tubulin folding pathway	4	0.140795	0.0261352	TBCA, RP2, TBCD, TBCE	2504	5	16792	5.36486	1	0.479027	39.5551
GO:0061087~positive regulation of histone H3-K27 methylation	4	0.140795	0.0261352	PHF19, PHF1, MTF2, EED	2504	5	16792	5.36486	1	0.479027	39.5551
GO:0071038~nuclear polyadenylation-dependent tRNA catabolic process	4	0.140795	0.0261352	EXOSC8, EXOSC9, EXOSC2, EXOSC3	2504	5	16792	5.36486	1	0.479027	39.5551
GO:0009113~purine nucleobase biosynthetic process	4	0.140795	0.0261352	SHMT1, GMPS, PAICS, GART	2504	5	16792	5.36486	1	0.479027	39.5551
GO:0033600~negative regulation of mammary gland epithelial cell proliferation	4	0.140795	0.0261352	ROBO1, PHB2, BRCA2, ETV4	2504	5	16792	5.36486	1	0.479027	39.5551
GO:0044770~cell cycle phase transition	4	0.140795	0.0261352	CDC7, TIMELESS, TIPIN, UBE2L3	2504	5	16792	5.36486	1	0.479027	39.5551
GO:0019348~dolichol metabolic process	4	0.140795	0.0261352	DPM1, ALG5, DPAGT1, DPM2	2504	5	16792	5.36486	1	0.479027	39.5551
GO:0007062~sister chromatid cohesion	81	2.85111	3.62372e-46	ITGB3BP, RAD51C, KIF22, XPO1, KNTC1, RANGAP1, AURKB, KIF2C, NDE1, CDCA8, RAD21, DDX11, SEH1L, INCENP, NUP37, CDCA5, STAG2, STAG1, KIF2A, ZW10, NUP133, DSN1, NUP85, PPP1CC, MRE11, MAD2L1, RCC2, SGO2, SGO1, NSL1, ZWINT, BUB1B, NUP107, MAPRE1, NUP43, NUP98, SPC24, SPC25, WAPL, PMF1-BGLAP, CENPA, CENPC, BUB1, SKA2, SKA1, ZWILCH, BUB3, NUDC, ERCC6L, CENPO, CENPN, CENPM, CENPL, PDS5B, PDS5A, CKAP5, TAO…	2504	103	16792	5.27371	1.79338e-42	8.96689e-43	6.8887e-43
GO:0000722~telomere maintenance via recombination	25	0.879972	4.07407e-14	RAD51C, XRCC3, LIG1, POLE, SMC5, POLA1, BRCA2, POLA2, WRN, RPA3, RAD51, RFC5, RPA1, PRIM1, POLD3, RPA2, RFC3, RFC4, RFC1, RFC2, POLD1, PRIM2, POLD2, NSMCE2, FEN1	2504	32	16792	5.23912	2.01648e-10	9.60232e-12	7.74603e-11
GO:0051315~attachment of mitotic spindle microtubules to kinetochore	6	0.211193	0.00276536	KIF2C, SEH1L, CENPC, CENPE, NDC80, MIS12	2504	8	16792	5.02955	0.999999	0.0932521	5.12808
GO:0000731~DNA synthesis involved in DNA repair	26	0.915171	7.73152e-14	RAD51D, RAD51C, NBN, XRCC3, XRCC2, BLM, WRNIP1, POLA1, CDKN2D, PALB2, EXO1, RAD51AP1, POLE, BRIP1, BRCA2, RMI2, WRN, RMI1, BRCA1, RAD51, RBBP8, MRE11, POLD3, RFC3, POLD1, BARD1	2504	35	16792	4.98165	3.82417e-10	1.73825e-11	1.46894e-10
GO:1904874~positive regulation of telomerase RNA localization to Cajal body	11	0.387188	7.76806e-06	CCT7, CCT5, TCP1, CCT4, DKC1, CCT8, RUVBL2, CCT2, CCT3, RUVBL1, CCT6A	2504	15	16792	4.91778	0.0377147	0.000526495	0.0147661
GO:0000732~strand displacement	19	0.668779	5.84727e-10	EXO1, RAD51D, RAD51C, NBN, XRCC3, RAD51AP1, XRCC2, BLM, BRCA2, BRIP1, RMI2, WRN, RMI1, BRCA1, RAD51, MRE11, RBBP8, PALB2, BARD1	2504	26	16792	4.90059	2.89381e-06	8.76913e-08	1.11157e-06
GO:0006409~tRNA export from nucleus	23	0.809574	8.46285e-12	NUP133, NUP153, NUP98, RAN, NUP88, NUP93, NUP85, NUPL2, NDC1, AAAS, NUP62, SEH1L, RAE1, NUP210, NUP205, NUP50, NUP37, NUP107, POM121C, NUP54, TPR, NUP43, NUP58	2504	32	16792	4.81999	4.18829e-08	1.55122e-09	1.6088e-08
GO:0072711~cellular response to hydroxyurea	5	0.175994	0.0118143	BLM, TIMELESS, DDX11, SPIDR, RAD51	2504	7	16792	4.79005	1	0.281388	20.2225
GO:0090267~positive regulation of mitotic cell cycle spindle assembly checkpoint	5	0.175994	0.0118143	XRCC3, MAD2L1, GEN1, NDC80, TPR	2504	7	16792	4.79005	1	0.281388	20.2225
GO:0006333~chromatin assembly or disassembly	5	0.175994	0.0118143	BAZ1B, MTA2, HIRIP3, ASF1B, SUV39H2	2504	7	16792	4.79005	1	0.281388	20.2225
GO:0051988~regulation of attachment of spindle microtubules to kinetochore	5	0.175994	0.0118143	NEK2, SPAG5, RACGAP1, KNSTRN, ECT2	2504	7	16792	4.79005	1	0.281388	20.2225
GO:0042148~strand invasion	5	0.175994	0.0118143	RAD51D, RAD51C, XRCC3, XRCC2, RAD51	2504	7	16792	4.79005	1	0.281388	20.2225
GO:0075522~IRES-dependent viral translational initiation	5	0.175994	0.0118143	EIF3D, EIF3A, PCBP2, EIF3F, PTBP1	2504	7	16792	4.79005	1	0.281388	20.2225
GO:0035735~intraciliary transport involved in cilium morphogenesis	5	0.175994	0.0118143	CEP131, IFT122, IFT81, PCM1, IFT74	2504	7	16792	4.79005	1	0.281388	20.2225
GO:0006268~DNA unwinding involved in DNA replication	7	0.246392	0.00133158	MCM7, MCM2, TOP2B, MCM4, TOP2A, RAD51, MCM6	2504	10	16792	4.69425	0.998632	0.0517911	2.50121
GO:0007019~microtubule depolymerization	7	0.246392	0.00133158	KIF14, KIF2C, KIF24, STMN3, KIF18A, KIF18B, STMN1	2504	10	16792	4.69425	0.998632	0.0517911	2.50121
GO:0000375~RNA splicing, via transesterification reactions	17	0.598381	3.02144e-08	GEMIN2, SRSF10, TRA2B, SF3B4, SF3B3, SF3A3, PRPF6, WDR83, SF3B1, SRSF4, SCAF11, DDX23, PRPF8, KHSRP, SRRM1, SNRNP40, TXNL4A	2504	25	16792	4.56013	0.00014952	2.99062e-06	5.74377e-05
GO:0010827~regulation of glucose transport	22	0.774375	2.32885e-10	NUP133, NUP153, NUP98, NUP88, NUP93, NUP85, NUPL2, NDC1, AAAS, NUP62, SEH1L, RAE1, NUP210, NUP205, NUP50, NUP37, NUP107, POM121C, NUP54, TPR, NUP43, NUP58	2504	33	16792	4.47071	1.15255e-06	3.7179e-08	4.42715e-07
GO:0007076~mitotic chromosome condensation	10	0.351989	7.61645e-05	CHMP1A, NCAPH, NCAPG, NUSAP1, AKAP8, CDCA5, SMC2, NCAPD3, SMC4, NCAPD2	2504	15	16792	4.47071	0.314051	0.00422646	0.14469
GO:0051382~kinetochore assembly	8	0.281591	0.000642664	POGZ, CENPA, CENPC, CENPF, CENPW, CENPE, MIS12, CENPH	2504	12	16792	4.47071	0.958479	0.0272866	1.21466
GO:0008334~histone mRNA metabolic process	8	0.281591	0.000642664	NCBP1, SNRPD3, ZNF473, SNRPB, SNRPF, SNRPE, SLBP, SNRPG	2504	12	16792	4.47071	0.958479	0.0272866	1.21466
GO:0043248~proteasome assembly	8	0.281591	0.000642664	PSMG4, ADRM1, PSMG1, PSMD13, PSMG2, PSMD11, PSMD4, PSMD8	2504	12	16792	4.47071	0.958479	0.0272866	1.21466
GO:0010388~cullin deneddylation	6	0.211193	0.00546	GPS1, COPS5, COPS6, COPS3, COPS7B, COPS8	2504	9	16792	4.47071	1	0.158512	9.8846
GO:0008608~attachment of spindle microtubules to kinetochore	6	0.211193	0.00546	KNL1, SGO1, NDC80, AURKB, BUB3, ZNF207	2504	9	16792	4.47071	1	0.158512	9.8846
GO:0045143~homologous chromosome segregation	4	0.140795	0.0465314	PLK1, PTTG3P, ESPL1, PTTG1	2504	6	16792	4.47071	1	0.652664	59.5784
GO:0006616~SRP-dependent cotranslational protein targeting to membrane, translocation	4	0.140795	0.0465314	SRP54, SRP72, SRP19, SRP9	2504	6	16792	4.47071	1	0.652664	59.5784
GO:0071156~regulation of cell cycle arrest	4	0.140795	0.0465314	FOXM1, NEUROD1, BIN1, CDK5	2504	6	16792	4.47071	1	0.652664	59.5784
GO:0000055~ribosomal large subunit export from nucleus	4	0.140795	0.0465314	XPO1, NUP88, RAN, NMD3	2504	6	16792	4.47071	1	0.652664	59.5784
GO:0010793~regulation of mRNA export from nucleus	4	0.140795	0.0465314	TPR, SETD2, IWS1, SUPT6H	2504	6	16792	4.47071	1	0.652664	59.5784
GO:0010216~maintenance of DNA methylation	4	0.140795	0.0465314	UHRF1, DNMT1, CTCF, HELLS	2504	6	16792	4.47071	1	0.652664	59.5784
GO:0072719~cellular response to cisplatin	4	0.140795	0.0465314	TIMELESS, DDX11, SLC31A1, RAD51	2504	6	16792	4.47071	1	0.652664	59.5784
GO:0042306~regulation of protein import into nucleus	4	0.140795	0.0465314	NUP62, NUP54, TPR, NUP58	2504	6	16792	4.47071	1	0.652664	59.5784
GO:0006269~DNA replication, synthesis of RNA primer	4	0.140795	0.0465314	PRIM1, PRIM2, PRIMPOL, POLA1	2504	6	16792	4.47071	1	0.652664	59.5784
GO:0000395~mRNA 5'-splice site recognition	4	0.140795	0.0465314	SRSF1, PSIP1, PRPF39, SNRPC	2504	6	16792	4.47071	1	0.652664	59.5784
GO:0051415~interphase microtubule nucleation by interphase microtubule organizing center	4	0.140795	0.0465314	TUBGCP4, TUBGCP3, TUBGCP5, MZT1	2504	6	16792	4.47071	1	0.652664	59.5784
GO:0006563~L-serine metabolic process	4	0.140795	0.0465314	SHMT1, SHMT2, SRR, PSPH	2504	6	16792	4.47071	1	0.652664	59.5784
GO:0031536~positive regulation of exit from mitosis	4	0.140795	0.0465314	PHB2, BIRC5, UBE2C, CDCA5	2504	6	16792	4.47071	1	0.652664	59.5784
GO:0000083~regulation of transcription involved in G1/S transition of mitotic cell cycle	15	0.527983	5.56033e-07	CDC6, CDK1, E2F4, POLA1, RB1, CDT1, CCNE1, TYMS, CDC45, DHFR, RRM2, NPAT, FBXO5, BRD4, ORC1	2504	23	16792	4.37352	0.00274803	4.58624e-05	0.00105702
GO:0006521~regulation of cellular amino acid metabolic process	33	1.16156	7.73256e-15	AZIN1, PSMA7, PSMB5, PSMF1, PSMB7, OAZ1, PSMB6, PSMB1, PSMB3, PSMD1, PSMD2, PSMD4, NQO1, PSMD6, PSMD7, PSMD8, ODC1, PSMA2, PSMC6, PSMD14, PSMC5, PSMD13, PSMA6, PSMC4, PSME1, PSMD12, PSMA5, PSMC3, PSME2, PSMD11, PSMA4, PSMC2, PSMC1	2504	51	16792	4.33922	3.84615e-11	2.02427e-12	1.47771e-11
GO:0007077~mitotic nuclear envelope disassembly	28	0.985568	2.15057e-12	NUP98, NUP93, BANF1, NDC1, VRK1, SEH1L, RAE1, NUP210, NUP50, NUP37, NUP54, POM121C, TPR, NUP58, NUP133, CDK1, NUP153, NUP88, NUP85, NUPL2, CCNB1, CCNB2, AAAS, NUP62, PLK1, NUP205, NUP107, NUP43	2504	44	16792	4.2675	1.06434e-08	4.09361e-10	4.08832e-09
GO:0031571~mitotic G1 DNA damage checkpoint	7	0.246392	0.00256061	RPA2, CCND1, RFWD3, TP53, RPS27L, CDK2, TP73	2504	11	16792	4.2675	0.999997	0.0878466	4.7571
GO:0051292~nuclear pore complex assembly	7	0.246392	0.00256061	NDC1, NUP153, NUP98, NUP205, NUP93, NUP107, TPR	2504	11	16792	4.2675	0.999997	0.0878466	4.7571
GO:0051436~negative regulation of ubiquitin-protein ligase activity involved in mitotic cell cycle	45	1.58395	1.23516e-19	FZR1, ANAPC15, ANAPC11, PSMA7, PSMB5, PSMF1, PSMB7, PSMB6, PSMB1, PSMB3, PSMD1, FBXO43, PSMD2, FBXO5, PSMD4, PSMD6, PSMD7, PSMD8, BUB3, CDK1, ANAPC5, CDC23, CDC20, UBE2C, CDC27, CDK2, PSMA2, CCNB1, PSMC6, PSMD14, PSMD13, PSMC5, MAD2L1, PSMA6, PSMD12, PSMC4, PSME1, PSMA5, PSMC3, PSME2, PSMD11, PSMA4, PSMC2, PSMC1, BUB1B	2504	71	16792	4.25033	6.11279e-16	5.09399e-17	2.34804e-16
GO:0006297~nucleotide-excision repair, DNA gap filling	15	0.527983	1.1509e-06	POLK, LIG1, POLE, XRCC1, RPA3, RFC5, RPA1, POLD3, RPA2, RFC3, RFC4, RFC1, RFC2, POLD1, POLD2	2504	24	16792	4.19129	0.00567961	8.89929e-05	0.00218784
GO:0007051~spindle organization	10	0.351989	0.00015103	KIF11, CKAP5, SPAG5, TTK, AURKA, RANBP1, AURKB, KNSTRN, ASPM, AUNIP	2504	16	16792	4.19129	0.526453	0.00767662	0.286719
GO:0075713~establishment of integrated proviral latency	5	0.175994	0.0208633	XRCC5, PPIA, XRCC6, PSIP1, BANF1	2504	8	16792	4.19129	1	0.417629	33.0222
GO:2000001~regulation of DNA damage checkpoint	5	0.175994	0.0208633	RPA2, RFWD3, WDR76, FBXO4, CRY1	2504	8	16792	4.19129	1	0.417629	33.0222
GO:0051256~mitotic spindle midzone assembly	5	0.175994	0.0208633	KIF23, KIF4B, KIF4A, AURKB, RACGAP1	2504	8	16792	4.19129	1	0.417629	33.0222
GO:0051983~regulation of chromosome segregation	5	0.175994	0.0208633	KIF2C, MKI67, BUB1, AURKB, ZNF207	2504	8	16792	4.19129	1	0.417629	33.0222
GO:0031497~chromatin assembly	5	0.175994	0.0208633	HMGB1, RBBP4, TP53, CHAF1A, CHAF1B	2504	8	16792	4.19129	1	0.417629	33.0222
GO:0000059~protein import into nucleus, docking	5	0.175994	0.0208633	NUP98, NUP205, IPO5, RANBP6, KPNB1	2504	8	16792	4.19129	1	0.417629	33.0222
GO:0043928~exonucleolytic nuclear-transcribed mRNA catabolic process involved in deadenylation-dependent decay	18	0.63358	7.21961e-08	EXOSC8, EXOSC9, CNOT8, NT5C3B, LSM6, LSM7, EXOSC2, EDC4, EXOSC3, CNOT7, DCPS, DIS3, DCP2, DCP1A, LSM5, LSM4, LSM3, LSM2	2504	29	16792	4.16239	0.000357235	6.8711e-06	0.000137245
GO:0006260~DNA replication	96	3.37909	3.02062e-40	CLSPN, NBN, DBF4, MCM10, CDT1, TOP1, MCM9, MCM8, CDC45, MCM7, ORC5, ORC6, POLG2, INO80E, ORC1, ORC3, CDC7, POLK, CDK1, CDC6, RBBP4, CCDC88A, SSBP1, DTL, LIG1, POLE, RMI2, TOPBP1, MCM2, RBBP7, MCM3, MCM4, RMI1, MCM5, CDK2, RBBP8, MCM6, MRE11, RAD1, RFC5, RFC3, RFC4, RFC1, TIMELESS, RFC2, RRM2, RRM1, PTMS, TNFAIP1, DSCC1, ING5, NUP98, BLM, TICRR, WRNIP1, TIPIN, POLA1, CHEK1, POLA2, KIN, DTD1, RPA3,…	2504	155	16792	4.15344	1.49491e-36	3.73727e-37	5.74222e-37
GO:0048025~negative regulation of mRNA splicing, via spliceosome	13	0.457585	9.22697e-06	SRSF10, TRA2B, HNRNPA2B1, PTBP1, RNPS1, RBMX, SRSF4, HNRNPK, SRSF7, C1QBP, SRSF9, DYRK1A, RBM10	2504	21	16792	4.15138	0.0446375	0.000608674	0.017539
GO:0031145~anaphase-promoting complex-dependent catabolic process	48	1.68955	7.93253e-20	FZR1, ANAPC15, AURKA, PTTG1, AURKB, ANAPC11, PSMA7, PSMB5, PSMF1, PSMB7, PSMB6, PSMB1, PSMB3, PSMD1, PSMD2, PSMD4, PSMD6, PSMD7, BUB3, PSMD8, CDK1, ANAPC5, SKP2, CDC23, CDC20, UBE2C, CDC27, PSMA2, CCNB1, PSMC6, PSMD14, PSMD13, PSMC5, MAD2L1, PSMA6, PSMD12, PSMC4, PSME1, PSMA5, PSMD11, PLK1, PSMC3, PSME2, PSMA4, PSMC2, PSMC1, BUB1B, UBE2S	2504	79	16792	4.07457	3.92581e-16	3.56892e-17	1.50798e-16
GO:0007094~mitotic spindle assembly checkpoint	12	0.422386	3.58742e-05	MAD2L1, PSMG2, PLK1, BUB1, CENPF, TTK, BUB1B, TPR, MAD2L2, BUB3, ZW10, ZNF207	2504	20	16792	4.02364	0.162676	0.00216283	0.0681749
GO:0006301~postreplication repair	9	0.31679	0.00057958	UBE2N, UBE2A, MSH2, NSMCE1, RAD18, UBE2V2, HLTF, BRCA1, WDR33	2504	15	16792	4.02364	0.943254	0.0250713	1.09605
GO:0043968~histone H2A acetylation	9	0.31679	0.00057958	YEATS4, ING3, MORF4L2, RUVBL2, ACTL6A, RUVBL1, TRRAP, EP400, BRD8	2504	15	16792	4.02364	0.943254	0.0250713	1.09605
GO:0051437~positive regulation of ubiquitin-protein ligase activity involved in regulation of mitotic cell cycle transition	45	1.58395	5.11495e-18	FZR1, ANAPC15, ANAPC11, PSMA7, PSMB5, PSMF1, PSMB7, PSMB6, PSMB1, PSMB3, PSMD1, PSMD2, FBXO5, PSMD4, PSMD6, PSMD7, CUL1, PSMD8, BUB3, CDK1, ANAPC5, CDC23, CDC20, UBE2C, CDC27, PSMA2, CCNB1, PSMC6, PSMD14, PSMD13, PSMC5, MAD2L1, PSMA6, PSMD12, PSMC4, PSME1, PSMA5, PLK1, PSMC3, PSME2, PSMD11, PSMA4, PSMC2, PSMC1, BUB1B	2504	76	16792	3.9707	2.53139e-14	1.80813e-15	9.72354e-15
GO:0051310~metaphase plate congression	7	0.246392	0.00447855	FAM83D, KIF22, KIF2C, CENPQ, CENPF, CENPE, NDC80	2504	12	16792	3.91187	1	0.13765	8.17895
GO:0016925~protein sumoylation	68	2.39352	2.60202e-26	SAE1, RANGAP1, CBX2, AURKB, SENP5, NFATC2IP, TOP1, CDCA8, RAD21, RAE1, SEH1L, INCENP, NSMCE1, NSMCE3, NSMCE2, NUP37, TPR, TOP2B, TOP2A, STAG2, STAG1, NUP133, NUP88, TP53, MTA1, NUP85, UBE2I, TOPORS, NUPL2, SENP1, AAAS, NUP205, PIAS2, NUP107, NUP43, NUP98, BLM, NUP93, SUMO3, RPA1, NDC1, SUMO2, SUMO1, HNRNPK, MDC1, NUP210, NUP50, RNF168, POM121C, HNRNPC, NUP54, NUP58, NUP153, KIAA1586, TRIM28, SMC5…	2504	117	16792	3.89755	1.28774e-22	1.83963e-23	4.94646e-23
GO:0051298~centrosome duplication	11	0.387188	0.000134474	TUBGCP4, STIL, TUBGCP3, SASS6, NDE1, TUBGCP5, CCP110, CKAP5, BRCA2, CEP152, CDK2	2504	19	16792	3.88246	0.486013	0.00698138	0.255327
GO:0000245~spliceosomal complex assembly	15	0.527983	4.21689e-06	SRPK2, TXNL4B, GEMIN2, SNRPD3, DDX1, SF1, SNRPD1, SNRPD2, PRPF6, SF3B1, SCAF11, LSM4, SNRPE, SNRPG, TXNL4A	2504	26	16792	3.86889	0.0206532	0.000298091	0.00801603
GO:0007059~chromosome segregation	39	1.37276	5.23758e-15	NEK2, CTCF, SPC25, TOP1, PMF1-BGLAP, NDE1, OIP5, HJURP, MIS18A, INCENP, CENPC, CDCA2, SKA3, SKA2, SKA1, TLK2, CDK5RAP2, TOP2A, CEP85, CENPN, KIF11, SLC25A5, DSN1, NUF2, CENPF, NDC80, CENPE, UBE2I, PMF1, KNSTRN, ESCO2, BRCA1, SRPK1, MIS12, CIAO1, PPP1R7, SPAG5, SGO1, CENPW	2504	68	16792	3.84613	2.58241e-11	1.43463e-12	9.91429e-12
GO:0042176~regulation of protein catabolic process	8	0.281591	0.00211586	FAM83D, ODC1, XPO1, UBXN2A, PSMD1, HGS, CHEK2, FAF1	2504	14	16792	3.83204	0.999972	0.0763414	3.94653
GO:0007064~mitotic sister chromatid cohesion	8	0.281591	0.00211586	WAPL, RAD21, PDS5B, POGZ, PDS5A, SMC1A, CDCA5, SMC3	2504	14	16792	3.83204	0.999972	0.0763414	3.94653
GO:0051439~regulation of ubiquitin-protein ligase activity involved in mitotic cell cycle	13	0.457585	3.17016e-05	CCNB1, CDK1, FZR1, ANAPC5, PLK1, ANAPC15, FBXO5, CDC23, CDC20, ANAPC11, UBE2C, CDC27, CDK2	2504	23	16792	3.79039	0.145205	0.00198403	0.0602478
GO:0006978~DNA damage response, signal transduction by p53 class mediator resulting in transcription of p21 class mediator	9	0.31679	0.00100813	CDKN1A, FOXM1, HIPK2, TP53, BRCA2, RBM38, CHEK2, BRCA1, TP73	2504	16	16792	3.77216	0.993206	0.0407446	1.89916
GO:0007099~centriole replication	9	0.31679	0.00100813	SASS6, PLK4, CCP110, CEP135, WDR62, CDK5RAP2, CEP152, CENPJ, CDK2	2504	16	16792	3.77216	0.993206	0.0407446	1.89916
GO:0010569~regulation of double-strand break repair via homologous recombination	9	0.31679	0.00100813	KDM1A, RPA2, PPP4R2, RAD51AP1, FIGNL1, CHEK1, SPIDR, PPP4C, RAD51	2504	16	16792	3.77216	0.993206	0.0407446	1.89916
GO:0035308~negative regulation of protein dephosphorylation	5	0.175994	0.033186	PTPA, IGBP1, ARPP19, YWHAB, YWHAE	2504	9	16792	3.72559	1	0.550293	47.3536
GO:0030071~regulation of mitotic metaphase/anaphase transition	5	0.175994	0.033186	CDC6, PLK1, CDC23, CENPE, UBE2C	2504	9	16792	3.72559	1	0.550293	47.3536
GO:0042921~glucocorticoid receptor signaling pathway	5	0.175994	0.033186	PTGES3, YWHAH, NEDD4, ARID1A, RBM14	2504	9	16792	3.72559	1	0.550293	47.3536
GO:0031110~regulation of microtubule polymerization or depolymerization	5	0.175994	0.033186	STMN3, SKA3, SKA2, STMN1, SKA1	2504	9	16792	3.72559	1	0.550293	47.3536
GO:0000075~cell cycle checkpoint	5	0.175994	0.033186	CCNE2, TICRR, RB1, FANCG, RBBP8	2504	9	16792	3.72559	1	0.550293	47.3536
GO:0060039~pericardium development	5	0.175994	0.033186	CCM2, RPGRIP1L, HEG1, SMAD2, SETD2	2504	9	16792	3.72559	1	0.550293	47.3536
GO:1904668~positive regulation of ubiquitin protein ligase activity	5	0.175994	0.033186	FZR1, PLK1, CDC20, UBE2C, UBE2S	2504	9	16792	3.72559	1	0.550293	47.3536
GO:0010950~positive regulation of endopeptidase activity	5	0.175994	0.033186	PRELID1, ADRM1, PSMD14, PSME1, PSME2	2504	9	16792	3.72559	1	0.550293	47.3536
GO:0006265~DNA topological change	5	0.175994	0.033186	TOP1, HMGB1, HMGB2, TOP2B, TOP2A	2504	9	16792	3.72559	1	0.550293	47.3536
GO:0006406~mRNA export from nucleus	55	1.93594	7.07211e-20	SRSF1, ENY2, NCBP1, EIF5A, SEH1L, RBM8A, RAE1, U2AF1, SRRM1, NUP37, GLE1, TPR, DDX39A, NUP133, CHTOP, NUP88, HNRNPA2B1, NUP85, NUPL2, SARNP, EIF4A3, AAAS, NUP205, THOC6, NUP107, NUP43, THOC3, NXT1, NUP98, SRSF10, SRSF11, NUP93, NDC1, BUD13, DDX19A, DDX19B, NUP210, NUP50, NUP54, POM121C, NUP58, NUP153, SMG6, ALYREF, RNPS1, CASC3, SLBP, SRSF3, SRSF2, SRSF4, UPF3B, SRSF7, NUP62, SRSF9, FYTTD1	2504	100	16792	3.68834	3.49999e-16	3.49999e-17	1.34441e-16
GO:0071479~cellular response to ionizing radiation	17	0.598381	1.8155e-06	RAD51AP1, BLM, GRB2, FIGNL1, MGMT, TP53, ECT2, RAD51, RAD1, CDKN1A, INTS7, MAPK14, RHNO1, FBXO4, SPIDR, EEF1D, NET1	2504	31	16792	3.67752	0.00894466	0.000136126	0.00345121
GO:0006369~termination of RNA polymerase II transcription	35	1.23196	1.02556e-12	SRSF1, NCBP1, SNRPD3, SRSF11, MAZ, RBM8A, NUDT21, ZNF473, U2AF1, SRRM1, DDX39A, PABPN1, CSTF3, CHTOP, CSTF2, ALYREF, RNPS1, CASC3, TTF2, SLBP, SRSF3, SARNP, SRSF2, EIF4A3, SRSF4, UPF3B, SRSF7, SRSF9, CPSF7, SNRPB, THOC6, SNRPF, SNRPE, THOC3, SNRPG	2504	64	16792	3.66738	5.07526e-09	2.03011e-10	1.94951e-09
GO:0060968~regulation of gene silencing	6	0.211193	0.0154449	HIST1H3B, HIST1H3C, HIST1H3F, HIST1H3G, CDK2, HIST1H3I	2504	11	16792	3.65786	1	0.345092	25.6138
GO:0034080~CENP-A containing nucleosome assembly	23	0.809574	2.59651e-08	ITGB3BP, CENPO, CENPN, CENPM, CENPL, RBBP4, CENPQ, CENPP, RBBP7, CENPK, CENPI, CENPH, OIP5, KNL1, HJURP, CENPA, MIS18A, CENPC, CENPW, HIST1H4C, MIS18BP1, RUVBL1, CENPU	2504	43	16792	3.58697	0.000128493	2.6771e-06	4.93597e-05
GO:0000729~DNA double-strand break processing	8	0.281591	0.0034601	UBE2N, NBN, BLM, UBE2V2, BRCA1, MRE11, BARD1, RBBP8	2504	15	16792	3.57657	1	0.113041	6.37668
GO:0000082~G1/S transition of mitotic cell cycle	54	1.90074	1.50621e-18	DBF4, IQGAP3, PKMYT1, MCM10, CDT1, PRIM1, CCNE2, CCNE1, CUL2, EIF4EBP1, MCM8, CDC45, MCM7, CDKN2C, CDKN2D, PRIM2, ORC5, RANBP1, ORC6, ORC1, CDCA5, CUL1, ORC3, CDC7, CDC6, CDK1, POLE, SKP2, CDK6, RB1, MCM2, CDK4, MCM3, MCM4, CDK2, MCM5, RBBP8, MCM6, CCND1, RRM2, POLA1, POLA2, CDC34, RPA3, RPA1, TYMS, RPA2, FBXO5, USP37, CDKN3, CDC25A, CDKN1A, DHFR, GSPT1	2504	102	16792	3.55027	7.45423e-15	5.73402e-16	2.86331e-15
GO:0075733~intracellular transport of virus	27	0.95037	1.55408e-09	XPO1, NUP133, NUP98, NUP153, TSG101, NUP88, RAN, NUP93, NUP85, NUPL2, NDC1, AAAS, NUP62, RAE1, SEH1L, NUP205, NUP210, CD209, NUP50, NUP37, POM121C, NUP107, NUP54, TPR, NUP43, KPNB1, NUP58	2504	51	16792	3.55027	7.69109e-06	2.13642e-07	2.9543e-06
GO:0042769~DNA damage response, detection of DNA damage	19	0.668779	7.55414e-07	MRPS26, DTL, USP1, MRPS11, RBX1, RPA3, RFC5, RPA1, POLD3, RPA2, RFC3, RFC4, RFC1, MRPS9, RFC2, POLD1, POLD2, RAD18, PARP1	2504	36	16792	3.53931	0.00373156	6.02973e-05	0.00143603
GO:0000724~double-strand break repair via homologous recombination	39	1.37276	1.98301e-13	RAD51D, RAD51C, XRCC3, NBN, XRCC2, BLM, XRCC1, RPA3, RPA1, RPA2, MCM9, SLX4, MCM8, FAN1, NSMCE1, NSMCE2, SPIDR, H2AFX, PALB2, POLQ, FEN1, RAD51AP1, MMS22L, NUCKS1, TONSL, GEN1, SMC5, BRCA2, RAD54L, BRCA1, MRE11, RBBP8, RAD51, UBE2N, PSMD14, NABP2, SFPQ, RNF138, PARP1	2504	74	16792	3.53428	9.81317e-10	4.2666e-11	3.76943e-10
GO:0033683~nucleotide-excision repair, DNA incision	20	0.703977	3.71882e-07	POLK, GTF2H3, GTF2H2, GTF2H1, RBX1, RPA3, RFC5, RPA1, POLD3, RPA2, FAN1, RFC3, RFC4, RFC1, RFC2, POLD1, POLD2, DDB2, OGG1, PARP1	2504	38	16792	3.52951	0.00183875	3.2288e-05	0.000706948
GO:0070987~error-free translesion synthesis	10	0.351989	0.000797593	RFC5, RPA1, RPA2, NPLOC4, RFC3, RFC4, RFC1, RFC2, SPRTN, RPA3	2504	19	16792	3.52951	0.980723	0.0329112	1.50539
GO:0042276~error-prone translesion synthesis	10	0.351989	0.000797593	RFC5, RPA1, RPA2, POLK, RFC3, RFC4, RFC1, RFC2, MAD2L2, RPA3	2504	19	16792	3.52951	0.980723	0.0329112	1.50539
GO:0043044~ATP-dependent chromatin remodeling	12	0.422386	0.000187198	RBBP4, HDAC2, HDAC1, SMARCB1, MTA2, SMARCC1, GATAD2B, ARID1A, ACTL6A, MBD3, HNRNPC, SMARCA4	2504	23	16792	3.49882	0.604075	0.00922251	0.355265
GO:0007067~mitotic nuclear division	129	4.54065	1.67989e-42	ITGB3BP, KNTC1, PKMYT1, AURKA, PTTG1, AURKB, RAD21, OIP5, INCENP, CCSAP, KLHL9, MIS18A, CDCA2, NUP37, CDCA5, ASPM, STAG2, CDCA3, STAG1, ZC3HC1, ANAPC5, RAN, DCTN3, RCC2, TIMELESS, SGO1, AKAP8, MAD2L2, NUP43, PPP5C, FZR1, NEK2, ANAPC15, TIPIN, LRRCC1, ANLN, ANAPC11, SPC24, SPC25, VRK1, PMF1-BGLAP, SAC3D1, NCAPG2, PBRM1, FBXO5, SKA3, SKA2, SKA1, HELLS, NUDC, ERCC6L, YEATS4, CKAP5, ARPP19, JTB, NUF2…	2504	248	16792	3.48824	8.31375e-39	2.77125e-39	3.19347e-39
GO:0031124~mRNA 3'-end processing	26	0.915171	5.39141e-09	SRSF1, NCBP1, SRSF11, RBM8A, NUDT21, U2AF1, SRRM1, DDX39A, PABPN1, CSTF3, CHTOP, CSTF2, ALYREF, RNPS1, CASC3, SARNP, SRSF3, EIF4A3, SRSF2, SRSF4, UPF3B, SRSF7, SRSF9, CPSF7, THOC6, THOC3	2504	50	16792	3.48716	2.66818e-05	6.84156e-07	1.02491e-05
GO:0006913~nucleocytoplasmic transport	13	0.457585	9.11329e-05	UPF3A, NUP98, AAAS, SET, RAN, NUP205, ANP32E, ANP32A, NEUROD1, EIF5A, NSRP1, CDK5, NUP58	2504	25	16792	3.48716	0.363033	0.00499899	0.173102
GO:0051301~cell division	179	6.3006	1.28801e-57	ITGB3BP, KIFC1, KNTC1, AURKA, PTTG1, CDCA8, RAD21, CDCA7, OIP5, MIS18A, CCSAP, CDCA2, VPS4A, NUP37, CDCA5, CDCA4, STAG2, CDCA3, STAG1, ZC3HC1, ANAPC5, RAN, LIG1, TACC3, PPP1CC, NCAPD3, TACC1, NCAPD2, PPP1CA, MAD2L1, TIMELESS, RCC2, SGO2, SGO1, SPAG5, ZWINT, CDCA7L, MAD2L2, NUP43, FZR1, NEK2, ANAPC15, KATNB1, TIPIN, LRRCC1, CNTRL, CDC34, ANAPC11, CHEK2, SPC24, SPC25, WAPL, VRK1, PMF1-BGLAP, TUBB, …	2504	350	16792	3.42968	6.37437e-54	6.37437e-54	2.44852e-54
GO:0036297~interstrand cross-link repair	25	0.879972	1.83492e-08	RAD51D, XRCC3, RPA3, FANCL, RPA1, SLX4, RPA2, FANCM, FAN1, FANCI, FANCE, RNF168, FANCG, ATRIP, FANCA, FANCB, FANCC, RAD51AP1, NUCKS1, USP1, EME1, RAD51, DCLRE1C, FANCD2, UBE2T	2504	49	16792	3.42146	9.08061e-05	2.06387e-06	3.48819e-05
GO:0006405~RNA export from nucleus	28	0.985568	2.22739e-09	NXT1, SRSF1, NCBP1, NUP98, SRSF11, RBM8A, U2AF1, SRRM1, RANBP1, POM121C, TPR, DDX39A, CHTOP, ALYREF, RNPS1, CASC3, HNRNPA1, SRSF3, SARNP, EIF4A3, SRSF2, SRSF4, UPF3B, SRSF7, NUP62, SRSF9, THOC6, THOC3	2504	55	16792	3.414	1.10233e-05	2.97929e-07	4.23429e-06
GO:0038061~NIK/NF-kappaB signaling	33	1.16156	1.11156e-10	PSMA7, PSMB5, PSMF1, PSMB7, PSMB6, PSMB1, PSMB3, PSMD1, PSMD2, PSMD4, PSMD6, PPP4C, PSMD7, CUL1, PSMD8, BIRC2, PSMA2, PSMC6, PSMD14, PSMC5, PSMD13, PSMA6, PSME1, PSMC4, PSMD12, PSMA5, PSME2, PSMC3, PSMD11, PSMA4, PSMC2, UBA3, PSMC1	2504	66	16792	3.35304	5.50112e-07	1.83371e-08	2.11309e-07
GO:0007093~mitotic cell cycle checkpoint	16	0.563182	1.73101e-05	NBN, HRAS, KNTC1, TTK, CHEK1, RB1, NABP2, MAD2L1, PRCC, ZWINT, BUB1, BUB1B, ZWILCH, SMC1A, ZW10, DLG1	2504	32	16792	3.35304	0.0821015	0.00109771	0.0329014
GO:0006611~protein export from nucleus	15	0.527983	3.52109e-05	NXT1, XPO1, XPO6, NUP88, RAN, STRADA, EIF5A, STRADB, NUPL2, ANKLE1, CSE1L, NUTF2, TPR, ADAR, HSPA9	2504	30	16792	3.35304	0.159923	0.00214907	0.0669148
GO:0007052~mitotic spindle organization	15	0.527983	3.52109e-05	STIL, KIF11, RAN, TTK, AURKA, NDC80, SMC3, CCNB1, SPC25, WDR62, GPSM2, STMN1, DYNC1H1, SMC1A, KIF2A	2504	30	16792	3.35304	0.159923	0.00214907	0.0669148
GO:0007126~meiotic nuclear division	12	0.422386	0.000299219	TUBGCP4, TUBGCP3, TUBGCP5, XRCC2, MKI67, SMC1A, RAD54L, SMC3, CDK2, RAD51, SMC1B, ZW10	2504	24	16792	3.35304	0.772603	0.0137463	0.567287
GO:0010165~response to X-ray	11	0.387188	0.000613091	CDKN1A, CASP3, CCND1, XRCC2, BLM, MSH2, TP53, BRCA2, TP73, RAD51, IKBIP	2504	22	16792	3.35304	0.951931	0.0262725	1.15908
GO:0031572~G2 DNA damage checkpoint	10	0.351989	0.00125947	CLSPN, FZR1, TAOK1, DTL, PLK1, BABAM1, CHEK1, BRCA1, UIMC1, RBBP8	2504	20	16792	3.35304	0.998044	0.0494436	2.3673
GO:0006261~DNA-dependent DNA replication	9	0.31679	0.00259525	POLD3, RPA1, TFAM, RPAIN, BAZ1A, RFC1, POLD2, POLG2, POLQ	2504	18	16792	3.35304	0.999997	0.0883711	4.81996
GO:0051170~nuclear import	9	0.31679	0.00259525	GEMIN2, SNRPD3, SNRPB, SNRPD1, SNRPD2, SNRPF, SNRPE, HNRNPA1, SNRPG	2504	18	16792	3.35304	0.999997	0.0883711	4.81996
GO:0061136~regulation of proteasomal protein catabolic process	8	0.281591	0.00536719	PSMD14, PSME1, PSME2, NUDT15, UCHL5, PRKACA, USP14, TMF1	2504	16	16792	3.35304	1	0.15695	9.72461
GO:0016578~histone deubiquitination	7	0.246392	0.0111482	ENY2, USP3, USP21, USP22, TRRAP, USP16, USP34	2504	14	16792	3.35304	1	0.271699	19.1939
GO:0001833~inner cell mass cell proliferation	6	0.211193	0.023278	GINS1, NCAPG2, GINS4, BRCA2, CHEK1, PALB2	2504	12	16792	3.35304	1	0.448283	36.0934
GO:0034498~early endosome to Golgi transport	6	0.211193	0.023278	SNX8, RBSN, SNX2, SNX1, LMAN1, TMED9	2504	12	16792	3.35304	1	0.448283	36.0934
GO:0007084~mitotic nuclear envelope reassembly	5	0.175994	0.0489177	VRK1, PPP2CA, BANF1, REEP3, REEP4	2504	10	16792	3.35304	1	0.66173	61.4588
GO:0045724~positive regulation of cilium assembly	5	0.175994	0.0489177	CEP120, CCP110, MNS1, ARHGAP35, FUZ	2504	10	16792	3.35304	1	0.66173	61.4588
GO:0046653~tetrahydrofolate metabolic process	5	0.175994	0.0489177	MTHFD2, TYMS, SHMT1, SHMT2, DHFR	2504	10	16792	3.35304	1	0.66173	61.4588
GO:0051103~DNA ligation involved in DNA repair	5	0.175994	0.0489177	HMGB1, HMGB2, LIG1, PARP1, PARP2	2504	10	16792	3.35304	1	0.66173	61.4588
GO:0033151~V(D)J recombination	5	0.175994	0.0489177	DCLRE1C, HMGB1, HMGB2, LIG1, DCAF1	2504	10	16792	3.35304	1	0.66173	61.4588
GO:0000086~G2/M transition of mitotic cell cycle	67	2.35832	1.94779e-20	CEP76, BORA, CEP78, PKMYT1, AURKA, NDE1, PRKACA, MASTL, CDK5RAP2, TUBG1, DYNC1H1, PLCB1, CDK14, CUL1, CDK1, CEP41, TPX2, SKP2, PCM1, DCTN3, CEP152, CDK2, PPM1D, FGFR1OP, HAUS7, MAPRE1, HAUS8, DYNC1I2, MELK, HAUS4, HAUS3, HAUS6, HAUS5, NEK2, FOXM1, HAUS2, HAUS1, CHEK1, CNTRL, CHEK2, HMMR, TUBB, CEP57, ODF2, TUBB4B, TAF2, CEP131, RAB8A, CCP110, CKAP5, CEP135, ARPP19, ALMS1, BIRC5, CDC25C, CENPJ, YW…	2504	137	16792	3.27961	9.63959e-17	1.07107e-17	3.70275e-17
GO:0006296~nucleotide-excision repair, DNA incision, 5'-to lesion	18	0.63358	6.69177e-06	POLK, GTF2H3, GTF2H2, GTF2H1, RBX1, RPA3, RFC5, RPA1, POLD3, RPA2, RFC3, RFC4, RFC1, RFC2, POLD1, POLD2, DDB2, PARP1	2504	37	16792	3.26241	0.0325753	0.000459862	0.0127203
GO:0000281~mitotic cytokinesis	14	0.492784	0.000112329	CKAP2, KIF23, KIF4B, KIF4A, USP8, CENPA, PLK1, NUSAP1, ANLN, STMN1, CEP55, RACGAP1, KIF20A, MYH10	2504	29	16792	3.23741	0.42647	0.00596007	0.213321
GO:0010467~gene expression	23	0.809574	3.17005e-07	POLR2H, NCBP1, POLR2G, POLR2E, PTBP1, HNRNPA2B1, POLR2I, POLR2D, HNRNPA1, HNRNPR, RBMX, HNRNPA0, HNRNPU, HNRNPA3, HNRNPL, HNRNPM, HNRNPK, METTL3, HNRNPF, GOLPH3, PCBP2, HNRNPD, HNRNPC	2504	48	16792	3.21333	0.00156763	2.80149e-05	0.000602626
GO:0000398~mRNA splicing, via spliceosome	106	3.73108	7.71129e-31	RALY, NCBP1, PRPF4B, SNRPD3, LSM6, LSM7, SNRPD1, SNRPD2, SYNCRIP, NONO, DDX23, RBM8A, RAVER1, LSM5, U2AF1, LSM4, SRRM1, LSM3, LSM2, CCAR1, PABPN1, DDX39A, PTBP1, HNRNPA2B1, HNRNPR, HNRNPU, WDR83, AQR, SNRPB, SNRPA, SNRPC, SNRPF, SNRPE, SNRPG, FUS, SRSF10, PPIL1, SRSF11, ZCRB1, HNRNPA3, HNRNPL, HNRNPM, HNRNPK, DDX46, METTL3, HNRNPF, HTATSF1, HNRNPD, HNRNPC, NOVA1, PRPF40A, DHX8, CSTF3, CSTF2, RNPS…	2504	222	16792	3.202	3.81632e-27	6.36053e-28	1.46592e-27
GO:0071480~cellular response to gamma radiation	10	0.351989	0.0019148	XRCC5, KDM1A, CDKN1A, XRCC6, ELK1, H2AFX, CHEK2, TLK2, WRN, RAD51	2504	21	16792	3.19337	0.999924	0.0714258	3.57796
GO:0051276~chromosome organization	9	0.31679	0.00390264	CDCA8, SMCHD1, PTTG3P, SFPQ, CENPW, NCAPH2, PTTG1, RAD54L, SMC4	2504	19	16792	3.17656	1	0.124139	7.16389
GO:0051321~meiotic cell cycle	16	0.563182	4.22573e-05	EXO1, NBN, SPIN1, NEK2, OSGIN2, MRE11, RBBP8, NUMA1, PPP2CA, PSMC3IP, FBXO43, MNS1, ZNF318, H2AFX, BUB3, STAG2	2504	34	16792	3.1558	0.188715	0.00248662	0.0803008
GO:0006337~nucleosome disassembly	8	0.281591	0.00796454	SET, SMARCB1, SMARCC1, SMARCD1, SUPT16H, ARID1A, ARID2, SMARCA4	2504	17	16792	3.1558	1	0.21325	14.1022
GO:0006281~DNA repair	110	3.87188	4.93481e-31	RAD51D, RAD51C, XRCC3, XRCC2, MORF4L2, RPS27L, SPRTN, PTTG1, ANKLE1, NONO, DDX11, RDM1, POLK, NUDT1, TFPT, LIG1, POLE, TOPBP1, MRE11, RAD1, RFC5, UHRF1, RPAIN, NABP2, RAD18, PPP5C, FZR1, BLM, TICRR, SLF2, SLF1, CHEK1, TRRAP, SLX4, UBE2D3, SMARCB1, POLQ, ASF1A, RECQL4, TAOK1, INIP, CINP, EME1, TREX1, WRN, RAD54L, BRCA1, NSMCE4A, POLD1, PARPBP, SUPT16H, MTOR, CHAF1A, SMC1A, PARP1, CHAF1B, PARP2, KI…	2504	235	16792	3.13901	2.44224e-27	4.88447e-28	9.38109e-28
GO:0000077~DNA damage checkpoint	14	0.492784	0.000171301	E2F1, CLSPN, NBN, BRIP1, CHEK1, CHEK2, PTPN11, DOT1L, RAD1, MAPK14, INTS7, H2AFX, RHNO1, ATRIP	2504	30	16792	3.1295	0.571661	0.00852748	0.325142
GO:0006122~mitochondrial electron transport, ubiquinol to cytochrome c	7	0.246392	0.0162736	UQCRC2, UQCC3, UQCRC1, UQCRH, CYC1, CYCS, UQCRFS1	2504	15	16792	3.1295	1	0.355268	26.795
GO:0045190~isotype switching	7	0.246392	0.0162736	EXO1, NBN, MSH2, SWAP70, MLH1, EXOSC3, RNF168	2504	15	16792	3.1295	1	0.355268	26.795
GO:0007095~mitotic G2 DNA damage checkpoint	7	0.246392	0.0162736	CDK1, NBN, BLM, FANCI, SLF1, TOPBP1, MRE11	2504	15	16792	3.1295	1	0.355268	26.795
GO:0071897~DNA biosynthetic process	12	0.422386	0.00069471	TYMS, POLE4, POLE3, LIN9, LIG1, PHB, PRIM2, CENPF, POLG2, POLA2, POLQ, TK1	2504	26	16792	3.09511	0.967913	0.0292141	1.31242
GO:0006312~mitotic recombination	6	0.211193	0.0332786	RAD51D, RAD51C, XRCC2, TOP2B, TOP2A, RAD51	2504	13	16792	3.09511	1	0.549597	47.4494
GO:0006119~oxidative phosphorylation	6	0.211193	0.0332786	UQCRC2, TEFM, UQCRC1, FXN, UQCRH, MSH2	2504	13	16792	3.09511	1	0.549597	47.4494
GO:0000956~nuclear-transcribed mRNA catabolic process	6	0.211193	0.0332786	EXOSC10, EXOSC9, THRAP3, DHX34, LSM5, LSM4	2504	13	16792	3.09511	1	0.549597	47.4494
GO:0043069~negative regulation of programmed cell death	6	0.211193	0.0332786	DCPS, PSMC5, NUP62, PAX2, KANK2, TIGAR	2504	13	16792	3.09511	1	0.549597	47.4494
GO:0002479~antigen processing and presentation of exogenous peptide antigen via MHC class I, TAP-dependent	29	1.02077	1.84661e-08	PSMA7, PSMB5, PSMF1, PSMB7, PSMB6, PSMB1, PSMB3, PSMD1, PSMD2, PSMD4, PSMD6, PSMD7, PSMD8, PSMA2, PSMC6, PSMD14, PSMC5, PSMD13, PSMA6, PSME1, PSMC4, PSMD12, PSMA5, PSME2, PSMC3, PSMD11, PSMA4, PSMC2, PSMC1	2504	63	16792	3.08692	9.13846e-05	2.03086e-06	3.51042e-05
GO:0007080~mitotic metaphase plate congression	17	0.598381	3.18908e-05	KIF14, KIF22, KIFC1, KIF18A, CDC23, SPDL1, CENPE, CEP55, CCNB1, KIF2C, CHMP1A, CDCA8, SEH1L, VPS4A, CDCA5, KPNB1, ZW10	2504	37	16792	3.08117	0.146005	0.00197093	0.0606071
GO:0006298~mismatch repair	16	0.563182	6.38032e-05	EXO1, MSH2, MSH5, LIG1, MLH1, TREX1, TP73, RPA3, RPA1, POLD3, RPA2, MSH5-SAPCD1, POLD1, POLD2, PMS2P1, SETD2	2504	35	16792	3.06563	0.270774	0.00358189	0.12122
GO:0043488~regulation of mRNA stability	47	1.65435	4.30523e-13	XPO1, CARHSP1, PSMA7, PSMB5, PSMF1, PSMB7, PSMB6, SET, PSMB1, PSMB3, PSMD1, ANP32A, HNRNPD, PSMD2, PSMD4, PSMD6, PSMD7, PSMD8, ZC3H14, EXOSC8, EXOSC9, EXOSC2, YWHAB, ELAVL1, EXOSC3, YTHDF2, PSMA2, DIS3, PSMC6, PSMD14, PSMC5, PSMD13, PSMA6, PSMC4, PSME1, PSMD12, PSMA5, PSMC3, PSME2, DCP2, PSMD11, SERBP1, PSMA4, PSMC2, DCP1A, PSMC1, KHSRP	2504	103	16792	3.06005	2.13076e-09	8.87819e-11	8.18468e-10
GO:0006302~double-strand break repair	30	1.05597	1.41799e-08	XRCC5, NBN, PRKDC, CHEK2, RAD21, RNF168, H2AFX, POLQ, CDCA5, FEN1, TRIP13, RECQL4, MSH2, LIG1, EME1, DDX1, MND1, BRIP1, BRCA2, MTA1, WRN, ESCO2, BRCA1, UIMC1, MRE11, BAZ1B, TDP1, BABAM1, PARP1, MAD2L2	2504	66	16792	3.04821	7.01738e-05	1.7544e-06	2.6956e-05
GO:0032508~DNA duplex unwinding	20	0.703977	6.02155e-06	RECQL4, GINS1, XRCC5, GINS2, NBN, BLM, XRCC6, GINS4, G3BP1, DDX1, BRIP1, WRN, MCM3, DDX12P, MCM5, MRE11, CDC45, DDX11, RUVBL2, RUVBL1	2504	44	16792	3.04821	0.0293611	0.000419641	0.0114464
GO:0051297~centrosome organization	15	0.527983	0.000127589	HAUS4, HAUS3, HAUS6, CEP120, XRCC2, HAUS5, CKAP5, HAUS2, HAUS1, PCM1, BNIP2, PLK1, HAUS7, CDK5RAP2, HAUS8	2504	33	16792	3.04821	0.468196	0.00669536	0.24227
GO:1901796~regulation of signal transduction by p53 class mediator	56	1.97114	3.20944e-15	NBN, AURKA, AURKB, CSNK2A2, BRD7, KMT5A, RBBP4, MTA2, TP53, TPX2, RMI2, TOPBP1, BANP, MBD3, RBBP7, CDK5, RMI1, CDK2, RBBP8, MRE11, RAD1, RFC5, RFC3, RFC4, RFC2, HIPK2, MDM4, ING5, CDK5R1, BLM, CHEK1, CHEK2, RPA3, PIN1, RPA1, RPA2, RHNO1, PRKAA2, ATRIP, EXO1, TAF2, SSRP1, TAF6, CSNK2B, BRIP1, TRIM24, WRN, EHMT2, BRCA1, TP73, HDAC2, HDAC1, MAPK14, SUPT16H, KAT6A, BARD1	2504	124	16792	3.02855	1.5934e-11	9.3725e-13	6.11733e-12
GO:0070979~protein K11-linked ubiquitination	12	0.422386	0.00101567	UBE2E3, FZR1, UBE2D3, UBE2A, ANAPC5, CDC23, ANAPC11, UBE2C, UBE2L3, CDC27, UBE2S, UBE2T	2504	27	16792	2.98048	0.993455	0.0407109	1.91323
GO:0071539~protein localization to centrosome	8	0.281591	0.0113814	STIL, CEP131, NEDD1, CEP83, SPAG5, CCDC14, AURKA, PCM1	2504	18	16792	2.98048	1	0.275209	19.5554
GO:0010971~positive regulation of G2/M transition of mitotic cell cycle	8	0.281591	0.0113814	CDC7, RAD51C, CCND1, DBF4B, RCC2, MTA3, BRD4, CDK4	2504	18	16792	2.98048	1	0.275209	19.5554
GO:0006306~DNA methylation	11	0.387188	0.00202303	ATF7IP, KMT2A, MTA2, MGMT, EZH2, GATAD2A, GATAD2B, DNMT1, CTCF, EHMT2, HELLS	2504	25	16792	2.95067	0.999956	0.0741963	3.77652
GO:1901800~positive regulation of proteasomal protein catabolic process	7	0.246392	0.0228174	PSMC6, PSMC5, PSMC4, PSMC3, PSMC2, PSMC1, RNF40	2504	16	16792	2.93391	1	0.443341	35.5181
GO:0006275~regulation of DNA replication	7	0.246392	0.0228174	CCDC88A, NUCKS1, PPP2CA, EHMT2, SMC3, ESCO2, DSCC1	2504	16	16792	2.93391	1	0.443341	35.5181
GO:2000045~regulation of G1/S transition of mitotic cell cycle	7	0.246392	0.0228174	KIF14, E2F1, PID1, CCND1, PSME1, PSME2, TCF3	2504	16	16792	2.93391	1	0.443341	35.5181
GO:0097193~intrinsic apoptotic signaling pathway	13	0.457585	0.00073443	SIVA1, HRAS, NBN, CYCS, TP53, CUL2, APOPT1, CDKN1A, BAX, HIPK2, MLLT11, APAF1, CUL1	2504	30	16792	2.90596	0.973643	0.0305993	1.38696
GO:0006283~transcription-coupled nucleotide-excision repair	32	1.12636	1.81098e-08	POLR2H, HMGN1, POLR2G, POLR2E, COPS5, COPS6, COPS3, POLR2I, COPS7B, COPS8, POLR2D, XRCC1, RPA3, RBX1, RPA1, RPA2, TCEA1, GPS1, POLK, LIG1, GTF2H3, GTF2H2, GTF2H1, RFC5, POLD3, RFC3, RFC4, AQR, RFC1, RFC2, POLD1, POLD2	2504	74	16792	2.89992	8.96214e-05	2.08431e-06	3.44268e-05
GO:0006284~base-excision repair	15	0.527983	0.000269668	RECQL4, HMGB1, UNG, LIG1, NEIL3, TP53, WRN, XRCC1, RPA3, RPA1, RPA2, POLQ, OGG1, PARP2, FEN1	2504	35	16792	2.87403	0.73678	0.0126316	0.511396
GO:0006293~nucleotide-excision repair, preincision complex stabilization	9	0.31679	0.00797242	RPA1, RPA2, DDB2, GTF2H3, PARP1, GTF2H2, GTF2H1, RBX1, RPA3	2504	21	16792	2.87403	1	0.212299	14.1152
GO:0030970~retrograde protein transport, ER to cytosol	6	0.211193	0.0455732	NPLOC4, HSP90B1, DERL2, DERL1, FAF2, SELENOS	2504	14	16792	2.87403	1	0.648146	58.7991
GO:0000380~alternative mRNA splicing, via spliceosome	6	0.211193	0.0455732	SRSF1, KDM1A, HNRNPM, SFPQ, PTBP1, RBM17	2504	14	16792	2.87403	1	0.648146	58.7991
GO:0044030~regulation of DNA methylation	6	0.211193	0.0455732	MIS18A, MBD3, EHMT2, PARP1, GRHL2, BRCA1	2504	14	16792	2.87403	1	0.648146	58.7991
GO:0060071~Wnt signaling pathway, planar cell polarity pathway	39	1.37276	7.49363e-10	AP2S1, PSMA7, ZNRF3, PSMB5, PFN1, PSMF1, PSMB7, AP2B1, PSMB6, PSMB1, TIAM1, PSMB3, PSMD1, PSMD2, PSMD4, PSMD6, PSMD7, PSMD8, AP2M1, DVL2, VANGL1, CELSR3, PSMA2, PSMC6, PSMD14, PSMC5, PSMD13, PSMA6, ARRB2, PSMC4, PSME1, PSMD12, PSMA5, PSMC3, PSME2, PSMD11, PSMA4, PSMC2, PSMC1	2504	92	16792	2.84279	3.70859e-06	1.0596e-07	1.42454e-06
GO:0070584~mitochondrion morphogenesis	8	0.281591	0.015744	PID1, MFF, NDUFS6, SSBP1, BAX, POLDIP2, POLG2, SLIRP	2504	19	16792	2.82361	1	0.348946	26.0421
GO:0006977~DNA damage response, signal transduction by p53 class mediator resulting in cell cycle arrest	26	0.915171	1.0137e-06	E2F1, CNOT9, E2F4, CNOT8, E2F7, PPP2R5C, AURKA, CHEK2, CNOT7, GTSE1, TRIAP1, PRMT1, CASP2, TFDP1, CDK1, CNOT10, TP53, CDC25C, CENPJ, CDK2, CCNB1, CDKN1A, BAX, RBM38, PIDD1, MDM4	2504	62	16792	2.81222	0.00500427	7.9629e-05	0.00192704
GO:0090307~mitotic spindle assembly	15	0.527983	0.000381214	KIFC1, KIF11, NEK2, TPX2, BIRC5, CHEK2, MYBL2, BIRC2, ZNF207, TUBGCP4, TUBGCP3, TUBGCP5, MZT1, KPNB1, KIF2A	2504	36	16792	2.7942	0.848472	0.0171628	0.722206
GO:0019985~translesion synthesis	15	0.527983	0.000381214	POLK, DTL, PRIMPOL, SPRTN, RPA3, RFC5, RPA1, POLD3, RPA2, RFC3, RFC4, RFC1, RFC2, POLD1, POLD2	2504	36	16792	2.7942	0.848472	0.0171628	0.722206
GO:0007088~regulation of mitotic nuclear division	10	0.351989	0.0055951	MKI67, NEK2, CUL9, BORA, KIF20B, FBXO43, FBXO5, PKMYT1, CDC25C, PIN1	2504	24	16792	2.7942	1	0.161169	10.117
GO:0000278~mitotic cell cycle	17	0.598381	0.000141233	E2F4, XRCC2, USP3, NUDT15, KIF18B, CENPF, CENPE, CNTRL, CDC5L, CDC25B, PAK6, PAK2, PRDM5, CENPC, RRM1, CENPW, TFDP1	2504	41	16792	2.78057	0.502923	0.00725492	0.268143
GO:0006289~nucleotide-excision repair	17	0.598381	0.000141233	RAD51D, RAD23A, NEIL3, TP53, BRCA2, GTF2H3, GTF2H2, GTF2H1, RBBP8, RPA3, RPA1, SLX4, RPA2, FAN1, DDB2, OGG1, FANCC	2504	41	16792	2.78057	0.502923	0.00725492	0.268143
GO:0006606~protein import into nucleus	24	0.844773	3.82642e-06	TXNIP, NUP133, NUP153, IPO13, RAN, NUP88, NUP93, IPO9, NUP85, IPO8, RPAIN, CSE1L, NUP62, RAE1, NUP50, RANBP1, NUTF2, NUP107, POM121C, TPR, ING1, KPNB1, ADAR, NUP58	2504	58	16792	2.77493	0.0187588	0.000274412	0.00727379
GO:0006099~tricarboxylic acid cycle	12	0.422386	0.00202439	SDHA, NNT, ACO2, SUCLG2, SDHD, CS, IDH2, DLAT, PDHA1, MDH2, MDH1, FH	2504	29	16792	2.77493	0.999956	0.073699	3.77901
GO:0070125~mitochondrial translational elongation	35	1.23196	1.54253e-08	TUFM, MRPS16, MRPL42, MRPS15, AURKAIP1, MRPS12, MRPS11, MRPS10, GADD45GIP1, MRPL12, MRPL14, MRPL18, MRPL37, MRPL38, MRPL33, MRPL53, MRPL52, MRPS26, MRPL51, MRPS22, MRPL9, MRPS21, MRPS6, MRPS7, MRPL30, MRPL24, MRPL23, MRPL22, MRPS18C, MRPS9, MRPL28, MRPS18A, MRPL49, MRPL47, DAP3	2504	85	16792	2.76132	7.63367e-05	1.86194e-06	2.93235e-05
GO:0051571~positive regulation of histone H3-K4 methylation	7	0.246392	0.030919	KMT2A, RTF1, DNMT1, AUTS2, SNW1, NELFE, BRCA1	2504	17	16792	2.76132	1	0.528052	44.9566
GO:0008380~RNA splicing	68	2.39352	1.05006e-15	NCBP1, PRPF4B, LSM6, SNRPD3, SNRPD1, SYNCRIP, RP9, SNRPD2, NSRP1, NONO, DDX23, RBM8A, U2AF1, SRRM1, MAGOHB, LSM4, RBM10, SREK1IP1, SRPK2, PTBP1, MBNL1, SRPK1, TTF2, PRPF6, EIF4A3, C1QBP, KHSRP, SNRPB, THOC6, SNRNP40, RBM38, SNRPF, THOC3, PRPF38A, SUPT6H, SNRPG, PPP4R2, SRSF11, ZCRB1, WBP11, SF3B4, SF3B3, SF3B2, DDX47, SCAF11, PPP2CA, PRPF8, DHX15, DHX16, MTERF4, HNRNPC, NOVA1, USB1, DHX8, GEMIN2,…	2504	166	16792	2.74706	4.94504e-12	3.29625e-13	1.89848e-12
GO:0006310~DNA recombination	34	1.19676	2.9825e-08	XRCC5, HMGB1, RAD51C, XRCC3, HMGB3, BLM, XRCC6, KIN, RPA3, RPA1, NONO, RAD21, PSMC3IP, NSMCE3, ACTL6A, INO80E, RDM1, EXO1, RECQL4, TFPT, LIG1, TREX1, WRN, TSN, RAD54L, BRCA1, MRE11, RAD51, RPAIN, NSMCE4A, UCHL5, RUVBL2, RUVBL1, RBM14	2504	83	16792	2.74706	0.000147593	3.01232e-06	5.66975e-05
GO:0010212~response to ionizing radiation	20	0.703977	3.8125e-05	RAD51D, RAD51C, XRCC3, XRCC2, TICRR, INIP, MTA1, TOPBP1, RAD54L, BRAT1, BRCA1, UIMC1, DCLRE1C, RFWD3, NABP2, AEN, RRM1, BABAM1, RNF168, H2AFX	2504	49	16792	2.73717	0.171952	0.00227072	0.0724508
GO:0031297~replication fork processing	11	0.387188	0.00393414	FANCM, MMS22L, BLM, DDX11, NUCKS1, TONSL, ALYREF, PRIMPOL, EME1, WRN, RAD51	2504	27	16792	2.7321	1	0.124281	7.21968
GO:0051225~spindle assembly	11	0.387188	0.00393414	HAUS4, HAUS3, TUBB, HDAC3, HAUS6, HAUS5, NEK2, HAUS2, HAUS1, HAUS7, HAUS8	2504	27	16792	2.7321	1	0.124281	7.21968
GO:0070126~mitochondrial translational termination	35	1.23196	2.18816e-08	MRPS16, MRPL42, MRPS15, AURKAIP1, MRPS12, MRPS11, MRPS10, GADD45GIP1, MRPL12, MRPL14, MRPL18, MRPL37, MRPL38, MRPL33, MRPL53, C12ORF65, MRPS26, MRPL52, MRPL51, MRPS22, MRPL9, MRPS21, MRPS6, MRPS7, MRPL30, MRPL24, MRPL23, MRPL22, MRPS18C, MRPS9, MRPL28, MRPS18A, MRPL49, MRPL47, DAP3	2504	86	16792	2.72921	0.000108286	2.35418e-06	4.15971e-05
GO:0032212~positive regulation of telomere maintenance via telomerase	13	0.457585	0.00143683	TCP1, NEK2, CCT2, CCT3, AURKB, CCT6A, HNRNPA1, CCT7, CCT5, CCT4, DKC1, WRAP53, CCT8	2504	32	16792	2.72434	0.999188	0.0544906	2.69637
GO:1900034~regulation of cellular response to heat	30	1.05597	4.08858e-07	PTGES3, NUP98, NUP93, RPA3, NDC1, RPA1, RPA2, BAG1, SEH1L, RAE1, NUP210, NUP50, BAG2, NUP37, NUP54, POM121C, TPR, NUP58, NUP133, NUP153, NUP88, NUP85, NUPL2, YWHAE, AAAS, NUP62, NUP205, MTOR, NUP107, NUP43	2504	75	16792	2.68243	0.00202139	3.48863e-05	0.000777238
GO:0007346~regulation of mitotic cell cycle	16	0.563182	0.00037856	CKS1B, SAE1, BIRC5, TTC28, RB1, TP73, RPA3, CDKN1A, GBF1, PLK1, CDC123, CKS2, FBXO5, ZNF268, RNF20, RNF40	2504	40	16792	2.68243	0.846469	0.0172008	0.717197
GO:0045739~positive regulation of DNA repair	12	0.422386	0.0027712	UBE2N, EGFR, CEBPG, TRIM28, MGMT, BABAM1, H2AFX, UBE2V2, RNF168, BRCA1, UIMC1, TIGAR	2504	30	16792	2.68243	0.999999	0.092809	5.13865
GO:0071157~negative regulation of cell cycle arrest	8	0.281591	0.0211712	CCNK, CCND1, RASSF1, CHEK2, MDM4, ZNF268, HMGN5, CDK4	2504	20	16792	2.68243	1	0.42067	33.4214
GO:0000387~spliceosomal snRNP assembly	11	0.387188	0.00531441	CLNS1A, GEMIN2, SNRPD3, SNRPB, SNRPD1, LSM4, SNRPD2, SNRPC, SNRPF, SNRPE, SNRPG	2504	28	16792	2.63453	1	0.15645	9.6335
GO:0006513~protein monoubiquitination	11	0.387188	0.00531441	FANCL, RNF126, UBE2D3, TSG101, NEDD4, DTL, RAD18, TOPORS, UBE2T, CUL1, RBX1	2504	28	16792	2.63453	1	0.15645	9.6335
GO:0006295~nucleotide-excision repair, DNA incision, 3'-to lesion	9	0.31679	0.0145976	RPA1, RPA2, DDB2, GTF2H3, PARP1, GTF2H2, GTF2H1, RBX1, RPA3	2504	23	16792	2.62411	1	0.332563	24.3873
GO:0000715~nucleotide-excision repair, DNA damage recognition	9	0.31679	0.0145976	GPS1, COPS5, COPS6, COPS3, DDB2, COPS7B, COPS8, PARP1, RBX1	2504	23	16792	2.62411	1	0.332563	24.3873
GO:0071398~cellular response to fatty acid	9	0.31679	0.0145976	XRCC5, CCNB1, E2F1, PID1, NME1-NME2, NME1, CREB1, PDK4, SMARCD1	2504	23	16792	2.62411	1	0.332563	24.3873
GO:0000723~telomere maintenance	14	0.492784	0.00138159	RAD51D, PTGES3, XRCC5, NBN, SMG6, XRCC6, WRN, RPA1, POLD3, RPA2, POLD1, POLD2, FBXO4, TERF2	2504	36	16792	2.60792	0.998932	0.0528551	2.59398
GO:0032543~mitochondrial translation	14	0.492784	0.00138159	MRPS16, MRPL51, MRPS15, MRPS12, MRPS11, MRPS6, MRPS21, MRPS7, MRPS2, MRPL23, MRPS18C, MRPS18A, MRPL47, MTERF4	2504	36	16792	2.60792	0.998932	0.0528551	2.59398
GO:0008053~mitochondrial fusion	7	0.246392	0.0406878	MFF, OPA1, BAX, GDAP1, CHCHD3, MIGA1, ST20	2504	18	16792	2.60792	1	0.610544	54.5997
GO:0031047~gene silencing by RNA	43	1.51355	2.42648e-09	POLR2H, NCBP1, POLR2G, NUP98, CNOT9, POLR2E, POLR2I, TDRD9, NUP93, ERI1, POLR2D, CNOT7, NDC1, DROSHA, RAE1, SEH1L, NUP210, NUP50, HIST1H4C, NUP37, POM121C, NUP54, TPR, NUP58, NUP133, NUP153, NUP88, RAN, CNOT10, NUP85, TSN, IPO8, NUPL2, AAAS, NUP62, NUP205, HIST1H3B, HIST1H3C, NUP107, HIST1H3F, HIST1H3G, NUP43, HIST1H3I	2504	111	16792	2.59785	1.20086e-05	3.16017e-07	4.61275e-06
GO:0043967~histone H4 acetylation	12	0.422386	0.00372488	YEATS4, ING3, MORF4L2, BRCA2, HAT1, RUVBL2, ACTL6A, USP22, RUVBL1, TRRAP, EP400, BRD8	2504	31	16792	2.5959	1	0.119593	6.84844
GO:0042771~intrinsic apoptotic signaling pathway in response to DNA damage by p53 class mediator	12	0.422386	0.00372488	CDKN1A, MSH2, AEN, HIPK2, PPP2R5C, TP53, BRCA2, RPS27L, SNW1, CHEK2, TOPORS, TP73	2504	31	16792	2.5959	1	0.119593	6.84844
GO:0002223~stimulatory C-type lectin receptor signaling pathway	40	1.40795	1.63473e-08	HRAS, PSMA7, MAP3K7, PSMB5, PSMF1, PSMB7, PSMB6, UBE2D2, PSMB1, PAK2, PSMB3, PSMD1, PSMD2, PSMD4, PRKACA, PRKACB, PSMD6, PSMD7, CUL1, PSMD8, RAF1, PSMA2, UBE2N, NRAS, PSMC6, PSMD14, PSMD13, PSMC5, PSMA6, PSMD12, PSMC4, PSME1, PSMA5, PSMD11, PSMC3, PSME2, PSMA4, PSMC2, CD209, PSMC1	2504	105	16792	2.55469	8.08995e-05	1.92626e-06	3.10763e-05
GO:0000132~establishment of mitotic spindle orientation	8	0.281591	0.0277706	NUMA1, NDE1, CENPA, GPSM2, NDC80, SPDL1, CDK5RAP2, ZW10	2504	21	16792	2.55469	1	0.498427	41.4559
GO:0097150~neuronal stem cell population maintenance	8	0.281591	0.0277706	HES1, SS18, FANCD2, DLL1, JAG1, CDH2, PCM1, ASPM	2504	21	16792	2.55469	1	0.498427	41.4559
GO:0006335~DNA replication-dependent nucleosome assembly	12	0.422386	0.00492339	RBBP4, HIST1H3B, HAT1, HIST1H3C, HIST1H4C, ASF1B, HIST1H3F, CHAF1A, HIST1H3G, CHAF1B, ASF1A, HIST1H3I	2504	32	16792	2.51478	1	0.147555	8.95579
GO:0070911~global genome nucleotide-excision repair	12	0.422386	0.00492339	SUMO3, UBE2N, SUMO2, SUMO1, DDB2, GTF2H3, UBE2V2, UBE2I, PARP1, GTF2H2, GTF2H1, RBX1	2504	32	16792	2.51478	1	0.147555	8.95579
GO:0006396~RNA processing	36	1.26716	2.00747e-07	SNRPD3, U2SURP, TDRD9, LSM7, SNRPD1, SYNCRIP, NUFIP1, WBP11, RNGTT, ADAT1, HNRNPL, EXOSC10, HNRNPK, DKC1, HNRNPF, DHX34, RBMS2, HNRNPD, LSM4, DHX30, NOVA1, RTCA, PABPN1, DHX8, CSTF3, EXOSC9, ELAVL4, HNRNPU, MRM3, SUGP2, HNRNPH3, HNRNPUL1, CELF2, SNRNP40, TRUB2, ADAR	2504	97	16792	2.48885	0.000993005	1.87451e-05	0.000381621
GO:0016032~viral process	110	3.87188	1.03475e-20	XPO1, SYNCRIP, CBX5, TOP1, CUL2, DDX11, GBF1, RAE1, RALA, H2AFX, NUP37, CUL1, NUP133, RAN, RBL1, DCAF1, NUPL2, MRE11, AAAS, PSMA4, BIN1, NUP43, SUPT6H, PACS1, GRB2, RAD23A, PSMA7, KARS, RBX1, PSMB5, WAPL, PSMB7, PSMB6, HNRNPK, GADD45GIP1, PSMB1, PSMB3, NUP50, NUP54, NUP58, CCDC86, SUV39H1, FDPS, SNW1, HNRNPA1, VDAC1, HDAC1, NUP62, PSMC3, PSMC2, HSPD1, COPS6, DAXX, RNGTT, PAK2, SEH1L, COPB1, GTF2A…	2504	299	16792	2.46712	5.12096e-17	6.4012e-18	1.96706e-17
GO:0007131~reciprocal meiotic recombination	11	0.387188	0.0091834	RAD51D, RAD51C, XRCC3, RAD21, XRCC2, MSH2, MND1, RAD51, TRIP13, MRE11, KLHDC3	2504	30	16792	2.45889	1	0.233145	16.0865
GO:0006303~double-strand break repair via nonhomologous end joining	23	0.809574	6.3601e-05	XRCC5, NBN, XRCC6, POLA1, SMC5, PRKDC, MLH1, UBE2V2, UIMC1, BRCA1, MRE11, UBE2N, DCLRE1C, SUMO1, PSMD14, RIF1, MDC1, BABAM1, NSMCE2, HIST1H4C, RNF168, H2AFX, BARD1	2504	63	16792	2.44825	0.270044	0.00361152	0.120836
GO:2000134~negative regulation of G1/S transition of mitotic cell cycle	9	0.31679	0.024508	JADE1, CDKN1A, E2F7, EZH2, BRD7, CDC73, RB1, KANK2, SMARCA4	2504	25	16792	2.41419	1	0.460488	37.606
GO:0015949~nucleobase-containing small molecule interconversion	9	0.31679	0.024508	NME4, NME1-NME2, NME1, RRM2, DTYMK, RRM1, CTPS1, AK2, TXNRD1	2504	25	16792	2.41419	1	0.460488	37.606
GO:0051290~protein heterotetramerization	15	0.527983	0.00221412	XRCC6, CBR4, PDSS2, RRM2, RRM1, HIST1H3B, FARSB, HIST1H3C, HIST1H4C, NUP54, HIST1H3F, INSR, HIST1H3G, HIST1H3I, NUP58	2504	42	16792	2.39503	0.999983	0.0774933	4.12618
GO:0045931~positive regulation of mitotic cell cycle	10	0.351989	0.0169537	CCNB1, CDK1, EIF4EBP1, POLDIP2, BRCA2, BIRC5, ASNS, USP22, CDC25B, PTPN11	2504	28	16792	2.39503	1	0.363983	27.7511
GO:0006890~retrograde vesicle-mediated transport, Golgi to ER	29	1.02077	1.09657e-05	KIF23, KIF22, KIF4B, COPA, KIF4A, RER1, LMAN2, KIF2C, GBF1, TMED2, STX18, KLC1, COPB1, KIF2A, ZW10, KDELR2, KIF11, KIF15, KIF18A, CENPE, RACGAP1, TMED9, COPG1, SCYL1, BNIP1, ATP9B, GOLPH3, ARCN1, TMED7-TICAM2	2504	82	16792	2.37166	0.052823	0.000713815	0.0208437
GO:0006626~protein targeting to mitochondrion	12	0.422386	0.00822016	MFF, TOMM5, TIMM17A, GDAP1, TIMM17B, TIMM10, TOMM40, MTERF4, TOMM70, TIMM23, TIMM22, TOMM34	2504	34	16792	2.36685	1	0.215848	14.522
GO:0030433~ER-associated ubiquitin-dependent protein catabolic process	21	0.739176	0.000277454	NPLOC4, DERL2, DERL1, FOXRED2, UBE2J1, ERLIN1, UBQLN2, SELENOS, DERL3, STT3B, PSMC6, HSP90B1, PSMC5, PSMC4, PSMC3, PSMC2, PSMC1, TMUB1, UBXN8, FAF2, UBXN4	2504	60	16792	2.34712	0.746733	0.0128722	0.526125
GO:0032981~mitochondrial respiratory chain complex I assembly	22	0.774375	0.000197064	TIMMDC1, NDUFAF6, NDUFB11, NDUFB6, NDUFB10, NDUFAF8, NDUFB7, AIFM1, NDUFA9, NDUFA6, COA1, NDUFB9, NDUFC2, NDUFA10, TIMM21, NDUFS7, NDUFS6, NDUFV1, NDUFV2, NDUFS8, ACAD9, NDUFS3	2504	63	16792	2.3418	0.622945	0.00961058	0.373954
GO:0016575~histone deacetylation	16	0.563182	0.00200115	TBL1XR1, RBBP4, MTA2, PHB, MORF4L2, MTA3, MTA1, HMG20B, MBD3, RBBP7, KDM1A, SAP30, HDAC2, HDAC1, PRDM5, RBM14	2504	46	16792	2.33255	0.999951	0.073971	3.73641
GO:0090398~cellular senescence	8	0.281591	0.0448385	CDKN1A, HRAS, OPA1, SMC5, NSMCE2, H2AFX, TERF2, KAT6A	2504	23	16792	2.33255	1	0.643697	58.192
GO:0006479~protein methylation	8	0.281591	0.0448385	ARMT1, PRMT1, METTL21A, GSPT1, SNRPD3, SNRPB, PCMT1, METTL21C	2504	23	16792	2.33255	1	0.643697	58.192
GO:0006259~DNA metabolic process	9	0.31679	0.0309027	FANCM, MKI67, NME1, RAN, LIG1, TREX1, TOPBP1, WRN, TK1	2504	26	16792	2.32133	1	0.52958	44.9391
GO:0061024~membrane organization	11	0.387188	0.0149006	RAB8A, CCDC88A, YWHAH, YWHAB, YWHAQ, GNPAT, RALA, SGCE, YWHAE, SGCB, DHCR24	2504	32	16792	2.30521	1	0.336671	24.828
GO:0034644~cellular response to UV	15	0.527983	0.00360275	TP53, PBK, AURKB, TP73, CDC25A, KDM1A, TRIAP1, ATF4, NEDD4, BAX, POLD1, EIF2S1, PTN, RUVBL2, RHNO1	2504	44	16792	2.28616	1	0.116658	6.63112
GO:0006397~mRNA processing	61	2.14713	3.20764e-10	SRSF1, AURKAIP1, NSRP1, NONO, RBM8A, U2AF1, LSM5, MAGOHB, SRRM1, LSM3, PRKACA, RBM10, SREK1IP1, TSEN15, WDR33, PTBP1, HNRNPA2B1, MBNL1, HNRNPR, TTF2, SRPK1, C1QBP, KHSRP, CELF2, RBM38, FASTKD5, PRPF38A, SUPT6H, PPP4R2, SRSF11, KIN, SF3B4, SF3B3, SF3B2, HNRNPL, DDX47, SCAF11, METTL3, PRPF8, NUDT21, DHX15, ZC3H14, USB1, GEMIN2, RBM23, CASC3, SF3A2, ELAVL4, HNRNPA1, HNRNPA0, IWS1, SF3A3, SRSF2, SUGP…	2504	179	16792	2.28531	1.58746e-06	4.96082e-08	6.09774e-07
GO:0043161~proteasome-mediated ubiquitin-dependent protein catabolic process	69	2.42872	2.2237e-11	PPP2R5C, RLIM, GTSE1, UBXN2A, UBXN2B, WWP1, PCBP2, PSMD1, PSMD2, RNF38, PSMD4, PSMD6, RNF34, PSMD7, PSMD8, CUL1, KIF14, CDK1, TBL1XR1, UBE2A, ANAPC5, TP53, MTA1, TOPORS, UBE2C, PSMA2, MAD2L1, PSMA6, ARRB2, PSME1, PSMA5, PSME2, PSMA4, BUB1B, SIAH2, TNFAIP1, RAD23A, ANAPC15, ANAPC11, CDC34, PSMA7, RBX1, PSMB5, PSMF1, RNF126, PSMB7, UBE2D3, PSMB6, PSMB1, PSMB3, BUB3, CSNK1A1, UBXN1, CDC23, CDC20, PC…	2504	203	16792	2.2794	1.10051e-07	3.93039e-09	4.22726e-08
GO:0021987~cerebral cortex development	19	0.668779	0.000898822	KIF14, CEP120, CDH2, TACC3, YWHAE, MDK, TACC1, GART, KDM1A, NDE1, TRAPPC9, WDR62, BAX, LHX2, LRP8, ARHGAP11B, H2AFX, PLCB1, ASPM	2504	56	16792	2.27527	0.988325	0.0367066	1.69491
GO:0051726~regulation of cell cycle	42	1.47835	2.99173e-07	RAD51D, E2F2, COPS5, FIGNL1, LIN9, FOXM1, PRR11, PKMYT1, MYBL2, CCNE2, CCNE1, CABLES2, MASTL, CDK16, USP16, PLCB1, CDK14, CTBP1, RBBP4, BCR, PHACTR4, LIN52, DTL, CCNF, RBL1, SKP2, CENPF, RB1, CLIC1, CDC25C, BIRC2, CDC25A, CCNB1, DOT1L, YY1AP1, CCNB2, TRIM36, PLK1, UBA3, HIPK2, GADD45G, LIN54	2504	124	16792	2.27141	0.00147951	2.69198e-05	0.000568728
GO:0016569~covalent chromatin modification	38	1.33756	1.45483e-06	ZMYND11, ING3, SPIN1, HMGN3, ING2, CBX3, DEK, CBX2, CTCF, HMGN5, DAXX, ARID2, CHD9, SMARCB1, SMARCD1, H2AFY, PBRM1, BRD4, TLK2, LRWD1, ASF1B, ASF1A, ING1, RBL1, ANP32E, TRIM28, BANP, ARID1A, RB1, HLTF, UBN1, PHF19, PHF1, MTF2, SMARCC1, BABAM1, DNMT1, SMARCA4	2504	113	16792	2.25514	0.00717412	0.000110763	0.00276561
GO:0000079~regulation of cyclin-dependent protein serine/threonine kinase activity	13	0.457585	0.00913014	CCNE2, CDC6, CDK5R1, CCNK, CDKN1A, BLM, CDKN2C, CDKN2D, PKMYT1, CDC25C, CDKN3, CDC25A, GTF2H1	2504	39	16792	2.23536	1	0.233142	16.0007
GO:0042059~negative regulation of epidermal growth factor receptor signaling pathway	12	0.422386	0.0130117	PTPRJ, EGFR, RNF126, AP2B1, NUP62, TSG101, GRB2, AP2S1, CBL, SH3KBP1, HGS, AP2M1	2504	36	16792	2.23536	1	0.303794	22.0402
GO:0007049~cell cycle	72	2.53432	2.79116e-11	TUSC2, E2F2, E2F3, DBF4B, DTYMK, AURKA, AURKB, SENP5, DDX12P, CASP8AP2, BRD7, CABLES2, TLK2, USP16, CCAR1, SPECC1L, RBBP4, LIN52, RBL1, TP53, BANP, HMG20B, MCM2, CDK5, ESCO2, TACC1, CCND1, UHRF1, PPP1CA, MAPK6, CCND3, RIF1, CCND2, RBM38, LIN54, SIAH2, USP22, ZMYND11, CKS1B, LIN9, FOXM1, THAP5, TIPIN, HCFC1, CDC73, PIN1, SMARCB1, HJURP, CDC123, ING1, TERF2, PRPF40A, GPS1, INSM1, TXNIP, TXNL4B, GMN…	2504	217	16792	2.22506	1.38134e-07	4.76325e-09	5.306e-08
GO:0042752~regulation of circadian rhythm	16	0.563182	0.0039803	ADCY1, UBE3A, CREB1, EZH2, PRKDC, PPP1CC, NONO, MAGED1, PPP1CA, TIMELESS, SFPQ, PSPC1, HNRNPD, PRKAA2, CRY1, TOP2A	2504	49	16792	2.18974	1	0.124853	7.30139
GO:0043525~positive regulation of neuron apoptotic process	14	0.492784	0.0079733	SRPK2, CDK5R1, AIFM1, TP53, CDC34, CDK5, BCL2L11, PIN1, ATF4, CASP3, BAX, TFAP2A, NQO1, CASP2	2504	43	16792	2.18337	1	0.211193	14.1167
GO:0032467~positive regulation of cytokinesis	12	0.422386	0.0160827	KIF23, KIF14, CSPP1, CDC6, PKP4, KIF20B, CENPV, AURKB, RACGAP1, CIT, ECT2, CDC25B	2504	37	16792	2.17494	1	0.353439	26.5245
GO:0010332~response to gamma radiation	10	0.351989	0.0327364	XRCC2, FANCD2, BAX, TP53, BRCA2, PRKDC, CHEK2, PARP1, TP73, TIGAR	2504	31	16792	2.16325	1	0.547035	46.8862
GO:0006974~cellular response to DNA damage stimulus	67	2.35832	5.96638e-10	ARMT1, XRCC3, RPS27L, SPRTN, MCM10, FANCL, MCM9, MCM8, MCM7, ASH2L, DDX11, WDR76, H2AFX, MASTL, TLK2, FANCG, BRD4, USP16, TOP2A, GNL1, DDX39A, RBBP5, CCNK, DTL, TP53, TOPBP1, TOPORS, HPF1, PITHD1, MRE11, RAD51, RAD1, CCND1, NABP2, BAZ1B, TIMELESS, RAD18, PIDD1, UBE2T, BLM, SLF2, SLF1, TIPIN, CHEK1, CHEK2, KIN, RNF168, SPIDR, POLQ, TIGAR, VAV3, TAOK1, INIP, CBL, SMC5, SUV39H1, ATAD5, WRN, BRAT1, T…	2504	208	16792	2.16013	2.95276e-06	8.68459e-08	1.13421e-06
GO:0051881~regulation of mitochondrial membrane potential	9	0.31679	0.0469103	TUSC2, PID1, PRELID1, PYCR1, UCP2, BAX, MUL1, CLIC1, PARK7	2504	28	16792	2.15552	1	0.652435	59.8826
GO:0090503~RNA phosphodiester bond hydrolysis, exonucleolytic	9	0.31679	0.0469103	DIS3, USB1, EXOSC10, DCPS, CNOT8, TOE1, DCP2, ISG20L2, CNOT7	2504	28	16792	2.15552	1	0.652435	59.8826
GO:0010033~response to organic substance	9	0.31679	0.0469103	XRCC3, AQP9, SQLE, PPP2CA, CREB1, CTSC, XRCC1, CASQ1, GART	2504	28	16792	2.15552	1	0.652435	59.8826
GO:0007018~microtubule-based movement	26	0.915171	0.000204395	KIF14, KIF23, KIF4B, KIF22, KIFC1, KIF4A, DYNC1LI2, KIF24, KIF11, KIF5B, AP2S1, KIF15, KIF18A, KIF18B, CENPE, RACGAP1, KIF2C, AP2B1, KLC1, KIF20B, DYNC1H1, DYNLRB1, DYNC1I2, KIF20A, KIF2A, AP2M1	2504	81	16792	2.15257	0.636383	0.00986915	0.387841
GO:0045814~negative regulation of gene expression, epigenetic	16	0.563182	0.00491718	RBBP4, EZH2, RBBP7, SUZ12, PHF19, PHF1, MTF2, HIST1H3B, EED, DNMT1, HIST1H3C, H2AFY, HIST1H4C, HIST1H3F, HIST1H3G, HIST1H3I	2504	50	16792	2.14594	1	0.148277	8.94498
GO:0000209~protein polyubiquitination	58	2.04153	2.27298e-08	RUSC1, RLIM, CBFB, ZNF738, TPP2, PSMD1, PSMD2, PSMD4, RNF34, PSMD6, PSMD7, PSMD8, CUL1, UBE2A, DTL, SKP2, TOPORS, HLTF, PSMA2, RNF180, TRIM36, PSMA6, PSME1, PSMA5, PSME2, PSMA4, DDB2, RNF138, SIAH2, RNF20, UBE2V2, CDC34, PSMA7, RBX1, PSMB5, PSMF1, RNF126, PSMB7, UBE2D3, UBE2D2, PSMB6, PSMB1, RNF166, PSMB3, FBXO4, RNF144A, UBE2L3, BIRC2, PSMC6, PSMD14, PSMD13, PSMC5, PSMD12, PSMC4, PSMD11, PSMC3, …	2504	184	16792	2.11387	0.000112484	2.3934e-06	4.32095e-05
GO:0007339~binding of sperm to zona pellucida	11	0.387188	0.0279189	CCT7, CCT5, TCP1, CLGN, CCT4, CCT8, POMZP3, UBAP2L, CCT2, CCT3, SPA17	2504	35	16792	2.10762	1	0.498587	41.6254
GO:0090090~negative regulation of canonical Wnt signaling pathway	51	1.79514	2.28178e-07	GLI3, ZNRF3, JADE1, AES, PSMD1, PSMD2, PSMD4, PSMD6, PSMD7, PSMD8, G3BP1, TLE2, PSMA2, PSME1, PSMA6, SCYL2, PSME2, PSMA5, PSMA4, SIAH2, MAD2L2, NKD1, CDH2, PSMA7, FUZ, RBX1, PSMB5, PSMF1, PSMB7, PSMB6, PSMB1, PSMB3, LIMD1, CSNK1A1, DVL2, RGS19, PSMC6, PSMD14, PSMD13, PSMC5, PSMD12, PSMC4, INVS, HDAC1, PSMD11, PSMC3, PSMC2, MAPK14, PSMC1, SFRP4, IGFBP2	2504	163	16792	2.09822	0.00112861	2.09118e-05	0.000433766
GO:0042177~negative regulation of protein catabolic process	10	0.351989	0.0397156	EGFR, MAD2L1, PHB, AZIN1, BANP, MDM4, MAD2L2, PARK7, SF3B3, PIN1	2504	32	16792	2.09565	1	0.606568	53.7171
GO:0006120~mitochondrial electron transport, NADH to ubiquinone	15	0.527983	0.0102825	NDUFB11, NDUFB6, NDUFB10, NDUFB7, NDUFA9, NDUFA6, NDUFB9, NDUFC2, NDUFA10, NDUFS7, NDUFS6, NDUFV1, NDUFV2, NDUFS8, NDUFS3	2504	49	16792	2.05288	1	0.254703	17.8384
GO:0006446~regulation of translational initiation	11	0.387188	0.0336525	NCBP1, EIF4G2, EIF3D, EIF4G3, EIF3A, EIF3F, DDX1, EIF3K, GLE1, MTIF2, EIF2B1	2504	36	16792	2.04908	1	0.551974	47.8344
GO:0009060~aerobic respiration	10	0.351989	0.0476365	UQCRC2, SLC25A14, UQCRC1, FXN, UQCRH, NDUFV1, BLOC1S1, ADSL, COX19, MTFR2	2504	33	16792	2.03214	1	0.654966	60.4598
GO:0006370~7-methylguanosine mRNA capping	10	0.351989	0.0476365	POLR2H, NCBP1, POLR2G, POLR2E, POLR2I, GTF2H3, POLR2D, GTF2H2, RNGTT, GTF2H1	2504	33	16792	2.03214	1	0.654966	60.4598
GO:0000413~protein peptidyl-prolyl isomerization	13	0.457585	0.0202968	FKBP5, PTPA, PPIL1, FKBP3, FKBP1A, PIN4, NKTR, PIN1, PPIF, PPIH, PPIG, PPIA, PPIL4	2504	43	16792	2.02742	1	0.413813	32.2816
GO:0040008~regulation of growth	16	0.563182	0.00883974	YEATS4, ING3, ING2, MORF4L2, SOCS4, DLL1, MRGBP, UBE2E3, AES, PAK2, PPP2CA, NSMCE3, RUVBL2, ACTL6A, RUVBL1, BRD8	2504	53	16792	2.02447	1	0.228959	15.5315
GO:0006457~protein folding	54	1.90074	4.30173e-07	GRPEL1, RP2, VBP1, PDIA6, CCT2, CCT3, PRKCSH, CSNK2A2, NUDCD2, BAG2, TXNL1, ERP29, TBCE, CCT6A, NKTR, PFDN2, PDCL3, GNB2, TBCA, GNB1, MLEC, TBCD, PFDN4, GNB5, SIL1, RUVBL2, GNB4, TMX1, FKBP5, PPIL1, NFYC, FKBP1A, LMAN1, P3H1, TTC1, PPIL4, NUDC, HSPA9, TCP1, SACS, CSNK2B, ATF6, CCT7, PPIF, ERP44, CCT5, PPIH, HSP90B1, PPIG, CCT4, CLGN, PPIA, CCT8, HSPA4L	2504	180	16792	2.01182	0.00212666	3.60828e-05	0.000817757
GO:0018279~protein N-linked glycosylation via asparagine	12	0.422386	0.0285419	STT3B, OSTC, ST6GAL2, ST3GAL4, DPM1, RPN1, UBE2J1, ALG5, DPM2, RPN2, LMAN1, DERL3	2504	40	16792	2.01182	1	0.504652	42.3325
GO:0051262~protein tetramerization	12	0.422386	0.0285419	SHMT1, SHMT2, DHRS4, HMGCR, SBF2, NUDT21, CPSF7, TP53, ADSL, TGM3, TP73, FH	2504	40	16792	2.01182	1	0.504652	42.3325
GO:0051028~mRNA transport	14	0.492784	0.0173108	NCBP1, XPO1, G3BP2, HNRNPA1, IWS1, SLBP, UPF3A, HNRNPA3, RBM8A, KHSRP, SEC13, MAGOHB, NUTF2, SUPT6H	2504	47	16792	1.99755	1	0.368519	28.2484
GO:0008033~tRNA processing	11	0.387188	0.0401598	ADAT1, TRMU, RPP21, LSM6, PUSL1, FARS2, POP4, TPRKB, TRUB2, POP7, KARS	2504	37	16792	1.9937	1	0.607336	54.1223
GO:0006511~ubiquitin-dependent protein catabolic process	54	1.90074	6.30257e-07	COPS3, RLIM, ZNRF3, CUL2, CUL9, USP11, PSMD4, RANBP1, USP16, FBXO21, CUL1, USP14, USP13, UBE2A, DTL, USP1, SKP2, UBE2I, TOPORS, UBE2C, PSMA2, UBE2N, USP29, ADRM1, PSMA6, PSMA4, USP21, UCHL5, USP22, SIAH2, RNF20, USP8, USP3, UBE3A, NEDD8, PSMA7, PSMF1, UBE2D3, UBE2D2, USP37, RNF168, FBXO4, USP34, USP31, NPLOC4, CDC23, UBE2L3, PSMC6, PSMD14, PSMD13, PSMD11, PSMC2, USP48, RNF40	2504	182	16792	1.98971	0.00311428	5.11322e-05	0.00119811
GO:0006094~gluconeogenesis	13	0.457585	0.0242308	GPD2, PGAM1, BPGM, G6PC3, SLC25A11, ATF4, SLC25A10, ENO3, SLC25A1, CRY1, MDH2, MDH1, PC	2504	44	16792	1.98134	1	0.460017	37.2681
GO:0090305~nucleic acid phosphodiester bond hydrolysis	22	0.774375	0.00251179	GEN1, PGAP1, POLE, EME1, G3BP1, DDX1, POLA1, TREX1, WRN, TSN, ANKLE1, MRE11, RBBP8, PXDNL, RAD1, DCLRE1C, FANCM, TDP1, AEN, MGME1, DXO, FEN1	2504	75	16792	1.96711	0.999996	0.0868457	4.66845
GO:0030521~androgen receptor signaling pathway	12	0.422386	0.0339194	CCNE1, MED30, UBE3A, MED16, RAN, THRAP3, PIAS2, ARID1A, TGFB1I1, RB1, DAXX, BRCA1	2504	41	16792	1.96275	1	0.553166	48.1077
GO:0090263~positive regulation of canonical Wnt signaling pathway	35	1.23196	0.00011118	PSMA7, PIN1, PSMB5, PSMF1, PSMB7, PSMB6, PSMB1, PSMB3, PSMD1, PSMD2, PSMD4, PSMD6, USP34, PSMD7, PSMD8, ASPM, DVL2, RNF220, PSMA2, PSMC6, PSMD14, PSMC5, PSMD13, PSMA6, PSME1, PSMC4, PSMD12, PSMA5, PSME2, PSMC3, PSMD11, PSMA4, PSMC2, SFRP4, PSMC1	2504	120	16792	1.95594	0.423199	0.00596322	0.211142
GO:0000910~cytokinesis	14	0.492784	0.0205901	KIF23, PRC1, JTB, BRCA2, ESPL1, BIRC5, DCTN3, ECT2, PLK1, INCENP, KLHL9, RALA, CIT, KIF20A	2504	48	16792	1.95594	1	0.415074	32.6659
GO:0006338~chromatin remodeling	25	0.879972	0.00135327	MORF4L2, CBX3, DEK, DAXX, TOP1, SMARCB1, SMARCD1, PBRM1, ACTL6A, BRD4, RBBP4, KAT2B, NUDT5, TTF1, ARID1A, RB1, SUV39H2, BAZ1A, HDAC2, HDAC1, SMARCC1, RUVBL2, RUVBL1, SUPT6H, SMARCA4	2504	86	16792	1.94944	0.998771	0.0522029	2.54145
GO:0006695~cholesterol biosynthetic process	11	0.387188	0.0474793	CYB5R3, EBP, SQLE, HMGCR, FDPS, HMGCS1, PRKAA2, LBR, HSD17B7, FDFT1, DHCR24	2504	38	16792	1.94123	1	0.655343	60.3355
GO:0018107~peptidyl-threonine phosphorylation	11	0.387188	0.0474793	CDK1, CDK5R1, DYRK1A, HIPK2, WNK1, MYLK2, TTK, PRKACA, CHEK1, MTOR, CDK5	2504	38	16792	1.94123	1	0.655343	60.3355
GO:0000381~regulation of alternative mRNA splicing, via spliceosome	11	0.387188	0.0474793	HNRNPL, SRSF2, RBM8A, TRA2B, THRAP3, DYRK1A, PTBP1, RNPS1, NSRP1, RBM10, RBMX	2504	38	16792	1.94123	1	0.655343	60.3355
GO:0032147~activation of protein kinase activity	13	0.457585	0.0286959	KIF14, HMGB1, CLSPN, DBF4B, WNK1, STRADA, TPX2, STRADB, ECT2, EMP2, INSR, PPP2R3C, DLG1	2504	45	16792	1.93731	1	0.50485	42.5061
GO:0006342~chromatin silencing	13	0.457585	0.0286959	H2AFV, HIST1H2AG, HIST2H2AC, MORF4L2, H2AFZ, HIST1H2AI, HIST1H2AH, H2AFY, H2AFX, HIST1H2AJ, HIST1H2AM, HIST1H2AL, SUPT6H	2504	45	16792	1.93731	1	0.50485	42.5061
GO:0007265~Ras protein signal transduction	20	0.703977	0.005701	HRAS, GRB2, TRIM28, G3BP1, TP53, IQGAP3, G3BP2, RB1, CDK2, PARK7, NRAS, PLCE1, CDKN1A, GNB1, RASSF1, MAPK14, RAPGEF6, DNMT1, RALA, DHCR24	2504	70	16792	1.91602	1	0.163021	10.2988
GO:0006139~nucleobase-containing compound metabolic process	14	0.492784	0.0243123	SLC29A1, TYMS, DDX11, METTL4, OAS3, BRIP1, CTPS1, AK2, PRPSAP1, SRBD1, PRPS2, DDX12P, TK1, DUT	2504	49	16792	1.91602	1	0.459463	37.3677
GO:0009411~response to UV	12	0.422386	0.0399736	UBE2A, RPAIN, DTL, POLD1, CDKN2D, USP1, PRIMPOL, TIPIN, DDB2, RAD18, SPRTN, GTF2H2	2504	42	16792	1.91602	1	0.607291	53.9529
GO:0000226~microtubule cytoskeleton organization	20	0.703977	0.0067202	SPECC1L, GAS2L3, CDK1, DYNC1LI2, SPECC1, TBCE, BIRC5, TACC3, MARK1, TACC1, TTL, EML4, SS18, CUL9, CDK5RAP2, TUBG1, MAP7D1, TUBA1B, PPP2R3C, MAP6D1	2504	71	16792	1.88903	1	0.1872	12.0307
GO:0033209~tumor necrosis factor-mediated signaling pathway	33	1.16156	0.000414929	TNFRSF6B, PSMA7, PSMB5, PSMF1, PSMB7, PSMB6, PSMB1, PSMB3, PSMD1, PSMD2, PSMD4, PSMD6, PSMD7, PSMD8, TRAF3, BIRC2, AIM2, PSMA2, PSMC6, PSMD14, PSMC5, PSMD13, PSMA6, PSME1, PSMC4, PSMD12, PSMA5, PSME2, PSMC3, PSMD11, PSMA4, PSMC2, PSMC1	2504	118	16792	1.87543	0.871768	0.0184987	0.785842
GO:0006368~transcription elongation from RNA polymerase II promoter	24	0.844773	0.00307788	ENY2, TAF2, POLR2H, NCBP1, SSRP1, POLR2G, CCNK, POLR2E, TAF6, POLR2I, GTF2H3, CDC73, ELL3, POLR2D, GTF2H2, GTF2H1, ADRM1, RTF1, GTF2A2, NELFCD, SUPT16H, TCEA1, NELFE, SETD2	2504	86	16792	1.87146	1	0.101866	5.69169
GO:0006325~chromatin organization	12	0.422386	0.0467375	HMGN1, NUP133, HDAC3, HMGB2, HDAC1, NUCKS1, HIST1H1B, EZH2, SUV39H1, ATAD2, LRWD1, ING1	2504	43	16792	1.87146	1	0.652683	59.7442
GO:0070936~protein K48-linked ubiquitination	13	0.457585	0.039355	UBE2E3, RNF126, PELI1, UBE2D3, UBE2A, UBE2D2, UBE3A, HACE1, CDC34, TOPORS, UBE2C, RNF34, UBE2T	2504	47	16792	1.85487	1	0.606582	53.3855
GO:0001843~neural tube closure	21	0.739176	0.00784984	DVL2, STIL, PHACTR4, ARHGAP35, ARID1A, PAX2, GRHL2, FUZ, MTHFD1, PFN1, IFT122, TMED2, IFT57, LHX2, KIF20B, RALA, GLMN, PRKACA, APAF1, PRKACB, SETD2	2504	77	16792	1.82893	1	0.211654	13.9132
GO:0050852~T cell receptor signaling pathway	39	1.37276	0.000419306	HRAS, STOML2, CACNB3, PSMA7, MAP3K7, PSMB5, PSMF1, PSMB7, PSMB6, UBE2D2, PSMB1, PAK2, PSMB3, PSMD1, PSMD2, PSMD4, PSMD6, PSMD7, CUL1, PSMD8, PTPRJ, PSMA2, UBE2N, PSMC6, PSMD14, PSMC5, PSMD13, PSMA6, PSME1, PSMC4, PSMD12, PSMA5, PSMC3, PSME2, PSMD11, PSMA4, PSMC2, NCK1, PSMC1	2504	148	16792	1.76714	0.874516	0.0185252	0.7941
GO:0019886~antigen processing and presentation of exogenous peptide antigen via MHC class II	24	0.844773	0.00751106	KIF23, KIF4B, KIF22, DYNC1LI2, KIF4A, AP1M1, KIF11, AP1B1, AP2S1, KIF15, KIF18A, CENPE, RACGAP1, DCTN3, CTSV, KIF2C, AP2B1, KLC1, SEC13, DYNC1H1, SAR1B, DYNC1I2, AP2M1, KIF2A	2504	92	16792	1.74941	1	0.205724	13.3527
GO:0006334~nucleosome assembly	30	1.05597	0.00434955	HMGB2, HP1BP3, H1FX, DAXX, HIST1H2BO, HIST1H2BM, SET, CENPA, HIST1H2BJ, ANP32A, H2AFY, HIST1H4C, H2AFX, HIST3H2BB, ASF1B, ASF1A, HIST1H1E, HIST1H1D, ANP32B, HIST1H2BF, HIST1H1B, HIST1H1A, ANP32E, MCM2, HIST1H3B, HIST1H3C, HIST1H3F, HIST1H3G, HIST1H3I, KAT6A	2504	119	16792	1.69061	1	0.134791	7.95251
GO:0007050~cell cycle arrest	34	1.19676	0.00484423	NBN, HRAS, TSG101, CUL2, CDKN2C, CDKN2D, CDC123, MTBP, PRKAA2, DDIAS, CUL1, DHCR24, KAT2B, MSH2, TP53, STRADA, TBRG4, CDK6, STRADB, RB1, GAS1, CDKN3, TP73, EIF4G2, PPM1G, PA2G4, CDKN1A, RASSF1, KIF20B, RHEB, RBM38, MTOR, ZFHX3, BARD1	2504	141	16792	1.61707	1	0.147136	8.81802
GO:0016310~phosphorylation	24	0.844773	0.0203799	SEPHS1, CKMT1B, ALDH18A1, AK3, DCK, FN3KRP, DGKH, SHPK, TRRAP, CDK5, CKB, TK1, PANK4, TOP1, CERKL, PAK2, UCKL1, LIMD1, UCK2, PMS2P1, MTOR, GK, PAPSS1, PRPS2	2504	100	16792	1.60946	1	0.413463	32.3908
GO:0006464~cellular protein modification process	25	0.879972	0.0194791	PPP4R2, SEPHS1, TSG101, TTLL5, PRKDC, SAE1, NEDD8, DUSP12, CDC34, TTL, RABGGTB, UBE2D3, UBE2D2, RPN1, TGM3, RPN2, YES1, PLAT, ICMT, UBE2I, UBE2L3, ATG3, UBE2N, UBA3, UBE2S	2504	105	16792	1.59668	1	0.402557	31.199
GO:0098609~cell-cell adhesion	64	2.25273	0.000164705	LIMA1, VAPA, VAPB, H1FX, RANGAP1, PDLIM1, PAK6, EFHD2, BZW1, PAK2, LRRC59, RANBP1, CLINT1, CEACAM1, KIF5B, RAN, OLA1, EIF2S3, MRE11, EIF4G2, SCYL1, PRDX6, UBFD1, SERBP1, RARS, MAPRE1, RUVBL1, EEF1D, SH3GL1, HDLBP, USP8, SNX5, DIAPH3, SNX2, ASAP1, HCFC1, SNX1, RDX, ANLN, CAPZB, PFN1, PSMB6, HNRNPK, ATXN2L, PCMT1, NUDC, CKAP5, SWAP70, CBL, YWHAB, GLOD4, YWHAE, PARK7, CCNB2, CCT8, HIST1H3B, HIST1H3C…	2504	271	16792	1.58372	0.557446	0.00828379	0.312641
GO:0050821~protein stabilization	32	1.12636	0.00918602	ATP1B3, HCFC1, CCT2, CCT3, CHEK2, GTSE1, ZNF207, PIN1, P3H1, PFN1, SUMO1, ANK2, USP13, HIP1, TCP1, PDCD10, HIST1H1B, CREB1, PHB, MUL1, CCT6A, PARK7, CCT7, CDKN1A, CCT5, CCT4, RASSF1, PHB2, CCT8, RASSF2, HSPD1, MDM4	2504	136	16792	1.5779	1	0.232025	16.0907
GO:0008283~cell proliferation	84	2.95671	4.28158e-05	TUSC2, PTGES3, XRCC5, CMC4, STIL, HRAS, NBN, E2F8, DTYMK, CSPG4, ZEB1, AURKB, MCM10, FAM83D, KDM1A, KIF2C, MCM7, DKC1, CUL1, USP13, GNL3, EGFR, CDK1, KIF15, TP53, TPX2, SKP2, VTI1B, RBBP7, TACC3, GRHL2, CDK5, TACC1, MRE11, PLCE1, PA2G4, UHRF1, GNB1, BUB1B, TXNRD1, MAPRE2, MAPRE1, MDM4, BIN1, EMP2, MELK, SRGAP2, ZMYND11, CKS1B, CDK5R1, USP8, POLA1, HDGF, PRKDC, UBE2V2, TRAIP, PDAP1, TYMS, CSE1L, C…	2504	366	16792	1.5391	0.190954	0.00248983	0.0813615
GO:0042384~cilium assembly	28	0.985568	0.0253201	KIF24, TTC26, TMEM237, RAB3IP, FUZ, IFT122, RAB23, TMEM107, ATP6V0D1, CEP295, RAB8A, CEP83, CEP41, RPGRIP1L, CELSR3, ALMS1, KIAA0586, PCM1, ATP6V1D, FOPNL, POC1B, TRIM59, IFT57, FAM161A, RFX3, IFT81, IFT74, ARL13B	2504	124	16792	1.51427	1	0.469861	38.5862
GO:0038095~Fc-epsilon receptor signaling pathway	40	1.40795	0.00767078	HRAS, GRB2, PSMA7, MAP3K7, PSMB5, PSMF1, PSMB7, PSMB6, UBE2D2, PSMB1, PAK2, PSMB3, PSMD1, PSMD2, PSMD4, PSMD6, NFATC3, PSMD7, CUL1, PSMD8, VAV3, PSMA2, UBE2N, NRAS, PSMC6, PSMD14, PSMD13, PSMC5, PSMA6, PSMC4, PSME1, PSMD12, PSMA5, PSMC3, PSME2, PSMD11, PSMA4, PSMC2, PSMC1, CALM3	2504	178	16792	1.50698	1	0.208478	13.6174
GO:0019083~viral transcription	25	0.879972	0.0396985	NUP98, NUP93, NDC1, RAE1, SEH1L, NUP210, NUP50, NUP37, RPL11, POM121C, RPS20, NUP54, TPR, NUP58, NUP133, RPSA, NUP153, NUP88, NUP85, NUPL2, AAAS, NUP62, NUP205, NUP107, NUP43	2504	112	16792	1.49689	1	0.608118	53.7014
GO:0016567~protein ubiquitination	78	2.74551	0.000498553	LMO7, SAE1, LRR1, RLIM, ZNRF3, MKRN2, DCAF12, G2E3, DCAF10, NSMCE1, CUL9, KLHL9, WWP1, MED27, RNF38, NEURL1B, KLHL23, RNF34, FBXO21, DCAF16, CUL1, CDCA3, DCAF15, ZC3HC1, RNF220, CCNF, UBE2J1, SOCS4, UBE2C, DCAF1, UBE2N, PJA1, RFWD3, ARRB2, UBR7, MED8, FBXL5, RNF138, CAND2, CAND1, MDM4, TNFAIP1, ASB11, UBE2V2, CDC34, ASB13, ANAPC11, TRAIP, FEM1A, RBX1, MYCBP2, UBE2D3, KBTBD2, UBE2D2, FBXO43, RNF16…	2504	359	16792	1.45703	0.915242	0.0217943	0.943509
GO:0006412~translation	53	1.86554	0.00897891	ABCF1, MRPL42, COPS5, COA1, RPS27L, EIF4EBP2, RPL39L, SLC25A29, MRPL37, SLC25A1, RPL11, EGFR, MRPL52, MRPL51, ZNF90, SLC25A5, SOX11, GTF2H3, MRPL9, MRPS6, MRPS7, MRPS2, GTF2H2, TARS, MRPS18C, MRPS9, MRPS18A, MRPL49, FARSB, DHPS, MRPS16, MRPS15, MRPS12, MRPS11, MRPL14, MRPL18, RSL24D1, RPS20, SLC25A40, RPSA, EFL1, PDF, MRPS21, MRPL24, SLC25A11, MRPL23, SLC25A14, MRPL22, MRPL28, UCP2, SLC25A10, SLC…	2504	253	16792	1.40483	1	0.230929	15.7566
GO:0042787~protein ubiquitination involved in ubiquitin-dependent protein catabolic process	32	1.12636	0.0437575	FZR1, ANAPC15, AURKA, AURKB, ANAPC11, PTTG1, RBX1, CUL2, RNF126, WWP1, HECTD4, RNF34, CUL1, BUB3, RNF144A, CDK1, ANAPC5, CBL, HACE1, CDC23, CDC20, UBE2L3, UBE2C, CDC27, CCNB1, UHRF1, MAD2L1, NEDD4, PLK1, KLHDC8A, BUB1B, SIAH2	2504	153	16792	1.40258	1	0.636191	57.2833
GO:0045893~positive regulation of transcription, DNA-templated	107	3.76628	0.000258543	XRCC6, HMGN5, MAGED1, CREB3L2, ASPH, INSR, PCBD2, RAN, ARID1A, FOXN4, RFC1, MED16, MLLT11, TFAP2A, PIAS2, TGFB1I1, MAD2L2, RNF20, SMARCA4, HMGB2, BLM, ELK1, CHEK2, MYBL1, MDK, LHX2, HNRNPD, RNF10, ARNTL2, TCF3, HNRNPAB, DVL2, YEATS4, PHB, BRCA2, ATAD2, SMAD2, BRCA1, FEZF1, ATF4, HDAC2, PSMC5, HDAC1, NUP62, SMARCC1, RFX3, BMP7, ZFHX3, KAT6A, ENY2, E2F1, E2F3, GPBP1, CTCF, PAX2, GLI3, CAMKK2, CCNE1…	2504	515	16792	1.3933	0.721878	0.0122294	0.490349
GO:0006888~ER to Golgi vesicle-mediated transport	33	1.16156	0.0479606	COPA, DYNC1LI2, IER3IP1, VAPA, VAPB, LMAN2, LMAN1, MIA3, GBF1, TMED2, ANK2, COPB1, BCAP29, CREB3L2, DYNC1H1, SAR1B, ZW10, VTI1B, TMED9, YIF1B, DCTN3, HYOU1, COPG1, CNIH2, ARCN1, BET1L, GOSR2, CTSC, GOSR1, DYNC1I2, COG1, SPTB, TMED7-TICAM2	2504	160	16792	1.38313	1	0.655903	60.7148
GO:0006357~regulation of transcription from RNA polymerase II promoter	89	3.1327	0.00219233	HMGN1, ENY2, FOXK2, DEK, TCEAL7, ZEB1, HMGN5, TCEAL2, BUD31, CBFB, FEV, MAGED1, GABPB1, KDM1A, RAD21, MED27, SMARCD1, HOXC5, ATF6B, BRD7, USP16, BRD8, RBL1, TTF1, ARID1A, RB1, CDC5L, HLTF, UBN1, RBBP8, MYCN, MED6, CIAO1, ABT1, MED16, MED8, RUVBL1, CUX1, FOXD4L6, SMARCA4, HMGB1, HMGB2, LCORL, LITAF, ZNF76, ZNF367, NFYC, NEDD8, ATF1, ZNF704, HNRNPK, SMARCB1, HTATSF1, TEAD4, ACTL6A, TCEA1, GLO1, TCE…	2504	441	16792	1.35338	0.999981	0.0773057	4.08636
GO:0045892~negative regulation of transcription, DNA-templated	99	3.48469	0.00214611	XRCC5, XRCC6, ZNF639, CBX3, CBX1, TCEAL7, CBX5, MAGED1, NONO, KDM1A, WWP1, EED, DAP, CRY1, BEND5, MTA3, DEPDC1, HES1, PA2G4, TIMELESS, PRDM5, TFAP2A, SMARCA4, HMGB2, CDK5R1, SNX6, NOSTRIN, HESX1, BCOR, PHB, SUV39H1, SNW1, SMAD2, UIMC1, FOXP1, BRCA1, SUV39H2, FEZF1, YY1AP1, HDAC3, PSMC5, HDAC2, HDAC1, MLX, UBA3, RFX3, BMP7, ZFHX3, KAT6A, E2F1, NKAP, TSG101, EZH2, CTCF, ZEB1, RLIM, PAX2, GLI3, DAXX…	2504	499	16792	1.33046	0.999976	0.0768315	4.00186
GO:0006886~intracellular protein transport	46	1.61915	0.0464305	VPS29, COPA, XPO1, AP1M1, STX8, XPO6, AP1B1, SNX6, SNX5, TIMM17A, AP2S1, SNX8, TIMM17B, SNX2, SNX1, AP2B1, AP3M2, TMED2, STX18, KLC1, COPB1, BCAP29, IFT27, SAR1B, SAR1A, KPNB1, TBC1D9B, AP2M1, KDELR2, SNX27, RAN, IPO13, VPS45, ERP29, IPO11, SELENOS, IPO8, CDK5, COPG1, YWHAH, IPO5, ARCN1, SIL1, HGS, SEC13, VPS26A	2504	236	16792	1.30712	1	0.653498	59.497
GO:0006366~transcription from RNA polymerase II promoter	99	3.48469	0.0049721	NCBP1, ZNF639, PTTG1, CBFB, GATA2, RAD21, CREB3L2, STAG1, ELL3, GRHL2, ARRB2, ABT1, MED16, TFAP2A, TGFB1I1, ELK1, MYBL1, MYBL2, MEIS1, ATF1, PMF1-BGLAP, TCERG1, HNRNPK, HOXA5, PIR, VEZF1, TAF2, DVL2, TAF6, SUB1, SMAD2, PMF1, RBMX, ATF4, PSMC5, EBF4, SUPT16H, PARP1, NELFE, TCF12, ZFHX3, E2F4, COPS5, FOXK2, DEK, CTCF, PAX2, GLI3, YBX1, TMF1, FEV, RNGTT, ASH2L, POU5F1, ZNF148, GTF2A2, NFX1, CCNK, SS…	2504	513	16792	1.29415	1	0.148013	9.04048
GO:0006351~transcription, DNA-templated	362	12.742	2.61935e-06	ITGB3BP, XRCC5, XRCC6, ZNF782, HMGN5, ZNF254, NONO, MAP3K7, ZSCAN9, CDCA7, MED28, DDX11, ZNF773, PHTF2, TCEANC2, ZNF107, CRY1, FIZ1, CCAR1, ZNF101, ZNF43, ZNF100, TFPT, ZNF644, ZNF506, ZNF507, RXRG, HMG20B, DEPDC1, DCAF1, HES1, UHRF1, BAZ1A, SCYL1, BAZ1B, RFC1, PRDM5, ZNF239, ZNF384, PIAS2, CDCA7L, VGLL4, MAD2L2, ZNF382, SUPT6H, ZNF519, ZNF76, CHCHD3, MYEF2, ZNF232, CHEK2, HESX1, LHX2, HTATSF1, P…	2504	1955	16792	1.24174	0.0128795	0.000190617	0.00497928
GO:0006355~regulation of transcription, DNA-templated	276	9.71489	9.62688e-05	ITGB3BP, CDKN2AIPNL, ZNF782, PDLIM1, PTTG1, HMGN5, ZNF254, NONO, MAGED1, ZSCAN9, CDCA7, MED28, ZNF773, PHTF2, ZNF107, FIZ1, CCAR1, ZNF101, ZNF43, CHTOP, ZNF100, ZNF644, TFPT, ZNF506, ZNF507, HMG20B, HES1, BAZ1A, SCYL1, BAZ1B, ZNF239, ZNF384, CDCA7L, VGLL4, ZNF382, ZNHIT3, SUPT6H, ZNF519, SRSF10, ZNF232, MYBL1, CHEK2, LHX2, PIR, PBRM1, MTERF4, ARNTL2, TCF3, HIP1, ZNF69, YEATS4, NRBF2, PHB, PTPN14,…	2504	1504	16792	1.23064	0.379021	0.00522211	0.182849
GO:0000122~negative regulation of transcription from RNA polymerase II promoter	129	4.54065	0.0167829	XPO1, CBX2, AURKB, ZNF254, KANK2, GATA2, KDM1A, CGGBP1, EED, H2AFY, OLIG2, CRY1, RBM10, SCRT2, MTA2, RBL1, HNRNPA2B1, ARID1A, HES6, DCAF1, PKIA, SUZ12, TRIM37, HES1, UHRF1, TIMELESS, RFC1, MTF2, IGBP1, PRDM5, TFAP2A, ZNF431, MAD2L2, ZNF382, SMARCA4, HMGB1, HDGF, CHCHD3, SOX6, UBE2D3, TCERG1, BCOR, TCF25, TCF3, MEPCE, PHB, SUV39H1, SMAD2, SNW1, EHMT2, FOXP1, FNIP2, SUV39H2, SHOX2, FEZF1, HDAC3, HD…	2504	720	16792	1.2015	1	0.36259	27.5122

## Sheet: GO Cluster 7
Cluster 7 - Gene ontology results
GO term - Biological Process	Count	%	PValue	Genes	List Total	Pop Hits	Pop Total	Fold Enrichment	Bonferroni	Benjamini	FDR
GO:1904871~positive regulation of protein localization to Cajal body	8	0.27894	1.58179e-05	CCT7, CCT5, TCP1, CCT4, CCT8, CCT2, CCT3, CCT6A	2630	8	16792	6.38479	0.0806791	0.00152829	0.0302934
GO:0019348~dolichol metabolic process	5	0.174338	0.00262331	DPM1, SRD5A3, ALG5, DPAGT1, DPM2	2630	5	16792	6.38479	0.999999	0.121328	4.90685
GO:0071051~polyadenylation-dependent snoRNA 3'-end processing	5	0.174338	0.00262331	EXOSC6, EXOSC4, EXOSC5, EXOSC2, EXOSC3	2630	5	16792	6.38479	0.999999	0.121328	4.90685
GO:0075525~viral translational termination-reinitiation	5	0.174338	0.00262331	EIF3D, EIF3A, EIF3B, EIF3G, EIF3L	2630	5	16792	6.38479	0.999999	0.121328	4.90685
GO:0006121~mitochondrial electron transport, succinate to ubiquinone	4	0.13947	0.0135368	SDHA, SDHC, SDHD, SDHAF2	2630	4	16792	6.38479	1	0.377323	22.9762
GO:0000338~protein deneddylation	4	0.13947	0.0135368	COPS5, COPS6, TOR1A, COPS4	2630	4	16792	6.38479	1	0.377323	22.9762
GO:0051716~cellular response to stimulus	4	0.13947	0.0135368	EIF2B2, EIF2B1, EIF2B3, EIF2B4	2630	4	16792	6.38479	1	0.377323	22.9762
GO:0045006~DNA deamination	4	0.13947	0.0135368	EXOSC6, EXOSC4, EXOSC5, EXOSC3	2630	4	16792	6.38479	1	0.377323	22.9762
GO:1903553~positive regulation of extracellular exosome assembly	4	0.13947	0.0135368	SDC1, SDCBP, PDCD6IP, SDC4	2630	4	16792	6.38479	1	0.377323	22.9762
GO:0031125~rRNA 3'-end processing	4	0.13947	0.0135368	EXOSC6, EXOSC4, EXOSC5, ERI1	2630	4	16792	6.38479	1	0.377323	22.9762
GO:0002084~protein depalmitoylation	4	0.13947	0.0135368	LYPLA2, LYPLA1, PPT1, LYPLAL1	2630	4	16792	6.38479	1	0.377323	22.9762
GO:1904874~positive regulation of telomerase RNA localization to Cajal body	14	0.488145	2.54373e-09	TCP1, CCT2, CCT3, CCT6A, NOP10, SHQ1, CCT7, CCT5, CCT4, DKC1, CCT8, RUVBL2, RUVBL1, NHP2	2630	15	16792	5.95914	1.35274e-05	4.66467e-07	4.87228e-06
GO:1904851~positive regulation of establishment of protein localization to telomere	8	0.27894	6.14751e-05	CCT7, CCT5, TCP1, CCT4, DKC1, CCT8, CCT2, CCT6A	2630	9	16792	5.67537	0.278869	0.00501713	0.117684
GO:0006616~SRP-dependent cotranslational protein targeting to membrane, translocation	5	0.174338	0.00689131	SRP54, SEC61B, SRP72, SRP19, SRP9	2630	6	16792	5.32066	1	0.246392	12.4057
GO:0043985~histone H4-R3 methylation	5	0.174338	0.00689131	PRMT1, PRDM4, PRMT5, PRMT6, COPRS	2630	6	16792	5.32066	1	0.246392	12.4057
GO:0006521~regulation of cellular amino acid metabolic process	41	1.42957	3.57909e-23	PSMB10, PSMA7, PSMB5, PSMF1, PSMB7, PSMB6, OAZ1, PSMB1, PSMB3, PSMB2, PSMD1, PSMD2, PSMD3, PSMD4, PSMD5, PSMD6, PSMD7, PSMD8, ODC1, PSMB8, PSMB9, PSMA2, PSMA1, PSMC6, PSMD14, PSMD13, PSMC5, PSMA6, PSMD12, PSMC4, PSME1, PSMA5, PSMC3, PSME2, PSMD11, PSMA4, PSMC2, PSMD10, PSMA3, PSMC1, PSME3	2630	51	16792	5.13287	1.90336e-19	4.7584e-20	6.85542e-20
GO:0000470~maturation of LSU-rRNA	12	0.41841	1.00328e-06	EIF6, RSL1D1, MRPL1, NOP2, MAK16, RRP15, SNU13, RPL7A, NHP2, RPF1, TEX10, NSA2	2630	15	16792	5.10783	0.00532126	0.000130125	0.00192168
GO:1990592~protein K69-linked ufmylation	4	0.13947	0.029907	DDRGK1, UFM1, UFC1, UBA5	2630	5	16792	5.10783	1	0.588196	44.0986
GO:0071394~cellular response to testosterone stimulus	4	0.13947	0.029907	ROCK2, ELK1, SRD5A1, MSN	2630	5	16792	5.10783	1	0.588196	44.0986
GO:0061551~trigeminal ganglion development	4	0.13947	0.029907	NRP2, NRP1, SEMA3A, SIX4	2630	5	16792	5.10783	1	0.588196	44.0986
GO:0070934~CRD-mediated mRNA stabilization	4	0.13947	0.029907	DHX9, SYNCRIP, YBX1, HNRNPU	2630	5	16792	5.10783	1	0.588196	44.0986
GO:0002192~IRES-dependent translational initiation	4	0.13947	0.029907	EIF4EBP1, RBM4, DENR, EIF2D	2630	5	16792	5.10783	1	0.588196	44.0986
GO:1901985~positive regulation of protein acetylation	4	0.13947	0.029907	XBP1, CAMK1, TERF2IP, KAT5	2630	5	16792	5.10783	1	0.588196	44.0986
GO:0010950~positive regulation of endopeptidase activity	7	0.244073	0.000800955	PRELID1, ADRM1, PSMD14, PSME1, PSME2, PSME3, AKIRIN2	2630	9	16792	4.96595	0.985894	0.0457468	1.52305
GO:0010388~cullin deneddylation	7	0.244073	0.000800955	COPS2, COPS5, COPS6, COPS3, COPS4, COPS7A, COPS8	2630	9	16792	4.96595	0.985894	0.0457468	1.52305
GO:0030150~protein import into mitochondrial matrix	13	0.453278	6.05016e-07	GRPEL2, GRPEL1, TIMM17A, PAM16, TIMM17B, TOMM20, DNLZ, TOMM40, TOMM22, TIMM50, TIMM23, TIMM44, TIMM21	2630	17	16792	4.88249	0.00321231	8.6955e-05	0.00115885
GO:0070125~mitochondrial translational elongation	64	2.23152	3.16595e-33	MRPL40, MRPS36, MRPS35, MRPS34, MRPL42, MRPS33, MRPL41, AURKAIP1, MRPS30, MRPL36, MRPL37, MRPL39, MRPL32, MRPL35, MRPL2, MRPL52, MRPL1, MRPL4, MRPL51, MRPL50, MRPL3, MRPL9, MRPS5, MRPS18B, MRPS18A, MRPL49, MRPL47, MRPL48, MRPL46, MRPL43, MRPL44, TUFM, MRPS17, MRPS16, MRPS15, MRPS14, MRPS12, MRPS11, MRPS10, MRPL20, MRPL10, MRPL13, GADD45GIP1, MRPL15, MRPL14, MRPL17, GFM1, MRPL16, MRPL54, MRPL19, M…	2630	85	16792	4.80737	1.68365e-29	1.68365e-29	6.0641e-30
GO:0043248~proteasome assembly	9	0.313808	9.75978e-05	ADRM1, PSMG1, PSMD13, PSMG2, PSMD11, POMP, PSMD4, PSMD5, PSMD8	2630	12	16792	4.78859	0.404915	0.00783356	0.186774
GO:0034475~U4 snRNA 3'-end processing	6	0.209205	0.00346128	EXOSC8, EXOSC6, EXOSC4, EXOSC5, EXOSC2, EXOSC3	2630	8	16792	4.78859	1	0.146967	6.42554
GO:1903071~positive regulation of ER-associated ubiquitin-dependent protein catabolic process	6	0.209205	0.00346128	CAV1, XBP1, UBQLN2, UBQLN1, SGTA, BCAP31	2630	8	16792	4.78859	1	0.146967	6.42554
GO:0006418~tRNA aminoacylation for protein translation	29	1.01116	2.00288e-14	IARS2, VARS, KARS, IARS, WARS, HARS2, LARS, MRPL39, MARS, CARS, YARS, RARS2, DARS, AIMP2, SARS, AARS, GARS, EPRS, DARS2, PPA2, PPA1, TARS, RARS, EEF1E1, FARSB, HARS, CARS2, YARS2, FARSA	2630	40	16792	4.62897	1.06275e-10	6.25144e-12	3.82805e-11
GO:0070126~mitochondrial translational termination	62	2.16179	1.97827e-30	MRPL40, MRPS36, MRPS35, MRPS34, MRPL42, MRPS33, MRPL41, AURKAIP1, MRPS30, MRPL36, MRPL37, MRPL39, MRPL32, MRPL35, MRPL2, MRPL52, MRPL1, MRPL4, MRPL51, MRPL50, MRPL3, MRPL9, MRPS5, MRPS18B, MRPS18A, MRPL49, MRPL47, MRPL48, MRPL46, MRPL43, MRPL44, MRPS17, MRPS16, MRPS15, MRPS14, MRPS12, MRPS11, MRPS10, MRPL20, MRPL10, MRPL13, GADD45GIP1, MRPL15, MRPL14, MRPL17, MRPL16, MRPL54, MRPL19, MRPL18, MRPS2…	2630	86	16792	4.60299	1.05204e-26	5.26021e-27	3.7892e-27
GO:0006595~polyamine metabolic process	5	0.174338	0.0140924	ODC1, OAZ1, SRM, AMD1, SMS	2630	7	16792	4.56056	1	0.38744	23.803
GO:0051683~establishment of Golgi localization	5	0.174338	0.0140924	CDC42, YWHAZ, PDCD10, COPG1, STK25	2630	7	16792	4.56056	1	0.38744	23.803
GO:0075522~IRES-dependent viral translational initiation	5	0.174338	0.0140924	EIF3D, EIF3A, EIF3B, PTBP1, SSB	2630	7	16792	4.56056	1	0.38744	23.803
GO:1903077~negative regulation of protein localization to plasma membrane	5	0.174338	0.0140924	LYPD1, DAB2, NUMB, CLTC, AP2M1	2630	7	16792	4.56056	1	0.38744	23.803
GO:1904903~ESCRT III complex disassembly	7	0.244073	0.00173682	CHMP2A, CHMP1A, CHMP5, IST1, VTA1, CHMP7, VPS4A	2630	10	16792	4.46935	0.999903	0.0842776	3.27479
GO:0034975~protein folding in endoplasmic reticulum	9	0.313808	0.000218818	HSP90B1, EMC3, PDIA3, VAPA, EMC6, EMC1, HSPA5, CALR, CANX	2630	13	16792	4.42024	0.687704	0.015604	0.418295
GO:0002479~antigen processing and presentation of exogenous peptide antigen via MHC class I, TAP-dependent	42	1.46444	9.65484e-19	PSMB10, PSMA7, PSMB5, PSMF1, PSMB7, PSMB6, PSMB1, PSMB3, PSMB2, PSMD1, PSMD2, PSMD3, PSMD4, PSMD5, PSMD6, PSMD7, PSMD8, HLA-H, HLA-C, HLA-G, PSMB8, PSMB9, PSMA2, PSMA1, PSMC6, PSMD14, PSMD13, PSMC5, PSMA6, PSMC4, PSME1, PSMD12, PSMA5, PSMC3, PSME2, PSMD11, PSMA4, PSMC2, PSMD10, PSMA3, PSMC1, PSME3	2630	63	16792	4.25653	5.13444e-15	4.66767e-16	1.8493e-15
GO:0032543~mitochondrial translation	24	0.83682	7.89448e-11	MRPL2, MRPS17, MRPS16, MRPL51, MRPS34, MRPS15, PTRH1, RARS2, MRPS12, NDUFA7, MRPS24, MRPS11, MRPS21, MRPS2, MRPL23, MRPL10, MRPS18B, MRPS18A, HARS2, MRPL16, HARS, MTERF3, MRPL47, GATB	2630	36	16792	4.25653	4.19828e-07	1.82534e-08	1.51212e-07
GO:0000463~maturation of LSU-rRNA from tricistronic rRNA transcript (SSU-rRNA, 5.8S rRNA, LSU-rRNA)	6	0.209205	0.00678668	GTPBP4, RPL7L1, WDR12, BOP1, PES1, RPF2	2630	9	16792	4.25653	1	0.246425	12.2287
GO:0006621~protein retention in ER lumen	6	0.209205	0.00678668	KDELR2, ANKRD13C, PDIA3, GPAA1, KDELR1, OS9	2630	9	16792	4.25653	1	0.246425	12.2287
GO:0051561~positive regulation of mitochondrial calcium ion concentration	6	0.209205	0.00678668	FIS1, MCUR1, MICU2, RAP1GDS1, TGM2, BCAP31	2630	9	16792	4.25653	1	0.246425	12.2287
GO:0034427~nuclear-transcribed mRNA catabolic process, exonucleolytic, 3'-5'	6	0.209205	0.00678668	EXOSC8, EXOSC6, EXOSC4, EXOSC5, EXOSC2, EXOSC3	2630	9	16792	4.25653	1	0.246425	12.2287
GO:0045899~positive regulation of RNA polymerase II transcriptional preinitiation complex assembly	6	0.209205	0.00678668	PSMC6, PSMC5, PSMC4, PSMC3, PSMC2, PSMC1	2630	9	16792	4.25653	1	0.246425	12.2287
GO:0001731~formation of translation preinitiation complex	15	0.523013	1.02985e-06	EIF2S3, DENR, EIF2D, EIF3D, EIF3A, EIF3B, EIF3G, EIF3H, EIF3E, EIF4H, EIF3K, EIF3L, EIF3I, EIF3J, EIF3M	2630	23	16792	4.16399	0.00546176	0.00013039	0.00197256
GO:0038061~NIK/NF-kappaB signaling	43	1.4993	1.26402e-18	PSMB10, PSMA7, PSMB5, PSMF1, PSMB7, PSMB6, PSMB1, PSMB3, PSMB2, PSMD1, PSMD2, PSMD3, PSMD4, PSMD5, PPP4C, PSMD6, FBXW11, PSMD7, CUL1, PSMD8, PSMB8, PSMB9, PSMA2, PSMA1, PSMC6, PSMD14, PSMD13, PSMC5, PSMA6, PSMC4, PSME1, PSMD12, PSMA5, PSMC3, PSME2, PSMD11, PSMA4, PSMC2, PSMD10, PSMA3, UBE2M, PSMC1, PSME3	2630	66	16792	4.15979	6.72208e-15	5.60174e-16	2.42113e-15
GO:0051436~negative regulation of ubiquitin-protein ligase activity involved in mitotic cell cycle	46	1.60391	9.42951e-20	ANAPC16, PSMB10, ANAPC15, ANAPC11, PSMA7, PSMB5, PSMF1, PSMB7, PSMB6, PSMB1, PSMB3, PSMB2, PSMD1, PSMD2, PSMD3, PSMD4, PSMD5, UBE2D1, PSMD6, PSMD7, PSMD8, BUB3, ANAPC5, CDC23, PSMB8, PSMB9, PSMA2, PSMA1, PSMC6, PSMD14, PSMD13, PSMC5, PSMA6, PSMD12, PSMC4, PSME1, PSMA5, PSMD11, PSMC3, PSME2, PSMA4, PSMC2, PSMD10, PSMA3, PSMC1, PSME3	2630	71	16792	4.13663	5.01461e-16	7.16373e-17	1.80614e-16
GO:0042176~regulation of protein catabolic process	9	0.313808	0.000440436	CDC42, ODC1, SNF8, PSMD1, MDM2, HGS, PSMD3, NEDD4L, FAF1	2630	14	16792	4.10451	0.903937	0.0285086	0.840251
GO:0033235~positive regulation of protein sumoylation	7	0.244073	0.00331599	CDKN2A, PIAS4, PIAS3, TOLLIP, MUL1, RASD2, GNL3	2630	11	16792	4.06305	1	0.142383	6.16388
GO:0046903~secretion	5	0.174338	0.0247236	PTGES2, CA9, NPY2R, PRKCI, TPD52	2630	8	16792	3.99049	1	0.534727	38.0914
GO:0000467~exonucleolytic trimming to generate mature 3'-end of 5.8S rRNA from tricistronic rRNA transcript (SSU-rRNA, 5.8S rRNA, LSU-rRNA)	5	0.174338	0.0247236	EXOSC8, EXOSC2, ERI1, EXOSC3, ERI3	2630	8	16792	3.99049	1	0.534727	38.0914
GO:0032471~negative regulation of endoplasmic reticulum calcium ion concentration	5	0.174338	0.0247236	FIS1, BAK1, RAP1GDS1, TGM2, BCAP31	2630	8	16792	3.99049	1	0.534727	38.0914
GO:0006108~malate metabolic process	5	0.174338	0.0247236	ME3, ME2, MDH2, MDH1, FH	2630	8	16792	3.99049	1	0.534727	38.0914
GO:0051437~positive regulation of ubiquitin-protein ligase activity involved in regulation of mitotic cell cycle transition	47	1.63877	5.4568e-19	ANAPC16, PSMB10, ANAPC15, ANAPC11, PSMA7, PSMB5, PSMF1, PSMB7, PSMB6, PSMB1, PSMB3, PSMB2, PSMD1, PSMD2, PSMD3, PSMD4, PSMD5, UBE2D1, PSMD6, PSMD7, CUL1, PSMD8, BUB3, ANAPC5, CDC23, PSMB8, PSMB9, PSMA2, PSMA1, PSMC6, PSMD14, PSMD13, PSMC5, PSMA6, PSMD12, PSMC4, PSME1, PSMA5, PSMD11, PSMC3, PSME2, PSMA4, PSMD10, PSMC2, PSMA3, PSMC1, PSME3	2630	76	16792	3.94849	2.90193e-15	3.62741e-16	1.0452e-15
GO:0009168~purine ribonucleoside monophosphate biosynthetic process	8	0.27894	0.00163702	ADSS, ATIC, ADSL, GMPS, PAICS, IMPDH1, IMPDH2, GART	2630	13	16792	3.9291	0.999836	0.0803636	3.0894
GO:0000460~maturation of 5.8S rRNA	8	0.27894	0.00163702	EIF6, MAK16, RRP15, EXOSC4, MPHOSPH6, RPF1, C1D, NSA2	2630	13	16792	3.9291	0.999836	0.0803636	3.0894
GO:0031145~anaphase-promoting complex-dependent catabolic process	48	1.67364	6.13457e-19	ANAPC16, PSMB10, ANAPC15, ANAPC11, PSMA7, PSMB5, CUL3, PSMF1, PSMB7, PSMB6, PSMB1, PSMB3, PSMB2, PSMD1, PSMD2, PSMD3, PSMD4, PSMD5, UBE2D1, PSMD6, PSMD7, PSMD8, BUB3, ANAPC5, CDC23, PSMB8, PSMB9, PSMA2, PSMA1, PSMC6, PSMD14, PSMD13, PSMC5, PSMA6, PSMD12, PSMC4, PSME1, PSMA5, PSMD11, PSMC3, PSME2, PSMA4, PSMD10, PSMC2, PSMA3, PSMC1, FBXO31, PSME3	2630	79	16792	3.87937	3.26236e-15	3.62485e-16	1.17502e-15
GO:1903543~positive regulation of exosomal secretion	9	0.313808	0.00081443	CHMP2A, SDC1, TSG101, SNF8, VPS4A, SDCBP, HGS, PDCD6IP, SDC4	2630	15	16792	3.83087	0.986871	0.0455217	1.54849
GO:0035646~endosome to melanosome transport	6	0.209205	0.0118366	ANKRD27, BLOC1S6, AP1M1, AP3D1, RAB38, CD63	2630	10	16792	3.83087	1	0.346218	20.3932
GO:0006626~protein targeting to mitochondrion	20	0.69735	8.03351e-08	TIMM10B, TSPO, TIMM17A, MTX1, TIMM17B, TOMM40, TIMM23, TOMM70, TIMM44, TIMM8B, AIP, TRNT1, MFN2, MFF, FIS1, TOMM5, TIMM9, TOMM20, TOMM22, TOMM34	2630	34	16792	3.75576	0.000427131	1.2946e-05	0.000153875
GO:0030970~retrograde protein transport, ER to cytosol	8	0.27894	0.0028336	HSP90B1, DERL2, DERL1, SEC61B, FAF2, SELENOS, SEL1L, AUP1	2630	14	16792	3.64845	1	0.126054	5.29014
GO:0042273~ribosomal large subunit biogenesis	14	0.488145	2.66255e-05	SDAD1, RPL14, NIP7, MALSU1, NOC2L, WDR74, WDR55, NOP16, RPL26L1, AAMP, WDR12, RPL5, RPL11, PES1	2630	25	16792	3.57548	0.132029	0.00235716	0.0509865
GO:0032790~ribosome disassembly	5	0.174338	0.0390731	HBS1L, PELO, DENR, MTIF2, EIF2D	2630	9	16792	3.54711	1	0.670354	53.3932
GO:0021675~nerve development	5	0.174338	0.0390731	NRP2, NRP1, ILK, SEMA3A, AFG3L2	2630	9	16792	3.54711	1	0.670354	53.3932
GO:0006307~DNA dealkylation involved in DNA repair	5	0.174338	0.0390731	MPG, ASCC2, FTO, ALKBH3, ALKBH2	2630	9	16792	3.54711	1	0.670354	53.3932
GO:0036500~ATF6-mediated unfolded protein response	5	0.174338	0.0390731	HSP90B1, MBTPS2, XBP1, HSPA5, CALR	2630	9	16792	3.54711	1	0.670354	53.3932
GO:0008635~activation of cysteine-type endopeptidase activity involved in apoptotic process by cytochrome c	5	0.174338	0.0390731	BAK1, CASP3, CASP7, CYCS, DIABLO	2630	9	16792	3.54711	1	0.670354	53.3932
GO:0034314~Arp2/3 complex-mediated actin nucleation	12	0.41841	0.000177762	ACTR3, ARPC1A, ACTR2, ARPC1B, ARPC3, ACTR3B, ARPC2, ARPC5L, TRIM27, IQGAP2, ARPC4, ARPC5	2630	22	16792	3.48261	0.611484	0.013045	0.339938
GO:0090161~Golgi ribbon formation	6	0.209205	0.018937	STX6, TMED5, GOLPH3, PRMT5, VAMP4, OPTN	2630	11	16792	3.48261	1	0.460007	30.6636
GO:0001682~tRNA 5'-leader removal	6	0.209205	0.018937	RPP38, RPP30, POP4, POP5, RPP40, RPP14	2630	11	16792	3.48261	1	0.460007	30.6636
GO:0043488~regulation of mRNA stability	56	1.95258	6.47203e-19	PSMD1, PSMD2, PSMD3, PSMD4, PSMD5, PSMD6, PSMD7, PSMD8, SAMD4B, EXOSC8, EXOSC6, PCID2, EXOSC4, EXOSC5, EXOSC2, EXOSC3, YTHDF2, EXOSC1, PSMA2, PSMA1, PSMA6, PSME1, PSMA5, PSME2, PSMA4, SERBP1, PSMA3, PSME3, PSMB10, YWHAZ, PSMA7, PSMB5, PSMF1, PSMB7, SET, PSMB6, PSMB1, PSMB3, PSMB2, APEX1, TNPO1, ZC3H14, YWHAB, PSMB8, PSMB9, PSMC6, PSMD14, PSMC5, PSMD13, PSMC4, PSMD12, PSMC3, PSMD11, PSMD10, PSMC2,…	2630	103	16792	3.47134	3.44183e-15	3.44183e-16	1.23966e-15
GO:0010821~regulation of mitochondrion organization	7	0.244073	0.0092914	FIS1, MFF, SQSTM1, GOLPH3, MUL1, PINK1, VPS35	2630	13	16792	3.43796	1	0.295027	16.3727
GO:0000387~spliceosomal snRNP assembly	15	0.523013	2.32057e-05	CLNS1A, GEMIN2, STRAP, SNRPD3, SNRPD1, SNRPD2, PRMT5, WDR77, SNRPB, LSM4, DDX20, SNRPC, SNRPF, GEMIN7, GEMIN5	2630	28	16792	3.42042	0.116098	0.00212549	0.0444391
GO:0006301~postreplication repair	8	0.27894	0.00460037	UBE2N, UBE2A, MSH2, NSMCE1, UBE2V1, UBE2F, UBE2V2, UBE2B	2630	15	16792	3.40522	1	0.18344	8.45315
GO:0006488~dolichol-linked oligosaccharide biosynthetic process	8	0.27894	0.00460037	ALG1, ALG2, MPDU1, SRD5A3, DPAGT1, ALG8, ALG9, ALG14	2630	15	16792	3.40522	1	0.18344	8.45315
GO:0006450~regulation of translational fidelity	8	0.27894	0.00460037	IARS, AARS, LARS, YRDC, IARS2, VARS, RPS5, DTD1	2630	15	16792	3.40522	1	0.18344	8.45315
GO:0060071~Wnt signaling pathway, planar cell polarity pathway	49	1.70851	4.73736e-16	AP2S1, CLTC, GPC4, CDC42, AP2B1, TIAM1, PSMD1, PSMD2, PSMD3, PSMD4, PSMD5, PSMD6, PSMD7, PSMD8, PSMA2, PSMA1, PSME1, PSMA6, PSME2, PSMA5, PSMA4, PSMA3, PSME3, PSMB10, PSMA7, PSMB5, PFN1, PSMF1, PSMB7, PSMB6, PSMB1, PSMB3, PSMB2, AP2M1, FZD3, PSMB8, PSMB9, PSMC6, PSMD14, PSMC5, PSMD13, PSMD12, PSMC4, PSMD11, PSMC3, PSMD10, PSMC2, PSMC1, SMURF1	2630	92	16792	3.4006	2.36167e-12	1.5743e-13	8.54872e-13
GO:0006446~regulation of translational initiation	19	0.662483	1.58148e-06	NCBP2, DDX1, EIF5B, MTIF2, EIF2B1, EIF3D, EIF4G2, EIF3A, EIF3B, EIF3G, EIF3H, EIF3E, EIF4H, EIF3K, EIF3L, EIF3I, EIF3J, EIF2B2, EIF3M	2630	36	16792	3.36975	0.00837505	0.000182816	0.00302914
GO:0006099~tricarboxylic acid cycle	15	0.523013	3.84117e-05	SUCLG1, CS, IDH3B, DLAT, SDHA, SDHB, IDH3G, SDHC, SDHD, DLD, PDHA1, SUCLA2, MDH2, MDH1, FH	2630	29	16792	3.30248	0.184764	0.00328937	0.0735485
GO:0036258~multivesicular body assembly	16	0.55788	1.96036e-05	CHMP2A, CHMP5, TSG101, VTA1, CHMP4A, CHMP7, MVB12A, CHMP1A, IST1, SNF8, VPS4A, RAB11A, HGS, PDCD6IP, VPS28, VPS25	2630	31	16792	3.29538	0.0990025	0.00182733	0.0375422
GO:0051603~proteolysis involved in cellular protein catabolic process	24	0.83682	1.54442e-07	PSMB10, LGMN, CTSA, PSMA7, CAPN2, PSMB8, PSMB9, PSMA2, PSMB5, CTSL, PSMA1, PSMB7, LONP1, PSMB6, PSMA6, PSMB1, PSMA4, PSMB3, PSMA3, CLPP, PSMB2, CTSC, HSPA5, CTSB	2630	48	16792	3.1924	0.000820986	2.41563e-05	0.00029582
GO:0051170~nuclear import	9	0.313808	0.00356675	GEMIN2, SNRPD3, SNRPB, SNRPD1, SNRPD2, DDX20, SNRPF, GEMIN7, GEMIN5	2630	18	16792	3.1924	1	0.149907	6.61505
GO:0042274~ribosomal small subunit biogenesis	8	0.27894	0.00708479	RPS16, EMG1, RRP36, UTP11, RPS6, LTV1, RPS7, RPS24	2630	16	16792	3.1924	1	0.250713	12.732
GO:1901800~positive regulation of proteasomal protein catabolic process	8	0.27894	0.00708479	PSMC6, DDRGK1, PSMC5, PSMC4, PSMC3, XBP1, PSMC2, PSMC1	2630	16	16792	3.1924	1	0.250713	12.732
GO:1990126~retrograde transport, endosome to plasma membrane	7	0.244073	0.0141348	ANKRD27, VPS29, SNX27, SNX17, VPS35, VPS26A, VPS39	2630	14	16792	3.1924	1	0.386404	23.8656
GO:0048193~Golgi vesicle transport	7	0.244073	0.0141348	STX6, ARL1, GOLPH3, TRAPPC5, GOLGA5, STX10, TRAPPC3	2630	14	16792	3.1924	1	0.386404	23.8656
GO:0051016~barbed-end actin filament capping	7	0.244073	0.0141348	TWF1, TWF2, GSN, CAPZA2, CAPZA1, CAPG, CAPZB	2630	14	16792	3.1924	1	0.386404	23.8656
GO:0006164~purine nucleotide biosynthetic process	6	0.209205	0.0283502	MTHFD1, MTHFD2L, ATIC, ADSL, HPRT1, IMPDH2	2630	12	16792	3.1924	1	0.574478	42.3551
GO:0008334~histone mRNA metabolic process	6	0.209205	0.0283502	NCBP2, SNRPD3, SNRPB, LSM10, SSB, SNRPF	2630	12	16792	3.1924	1	0.574478	42.3551
GO:0042407~cristae formation	6	0.209205	0.0283502	LETM1, SAMM50, IMMT, CHCHD3, AFG3L2, APOO	2630	12	16792	3.1924	1	0.574478	42.3551
GO:0010510~regulation of acetyl-CoA biosynthetic process from pyruvate	6	0.209205	0.0283502	PDP1, PDK3, DLD, DLAT, PDHA1, PDHX	2630	12	16792	3.1924	1	0.574478	42.3551
GO:0002223~stimulatory C-type lectin receptor signaling pathway	51	1.77824	1.26006e-14	HRAS, MAP3K7, PSMD1, PSMD2, PSMD3, PSMD4, PSMD5, PSMD6, PSMD7, PSMD8, CUL1, BCL10, LYN, PSMA2, UBE2N, PSMA1, PSME1, PSMA6, PSME2, PSMA5, PSMA4, PSMA3, PSME3, PSMB10, UBE2V1, PSMA7, PSMB5, PSMF1, PSMB7, UBE2D2, PSMB6, PSMB1, PSMB3, PSMB2, UBE2D1, FBXW11, PSMB8, PSMB9, NRAS, PSMC6, PSMD14, PSMC5, PSMD13, PSMC4, PSMD12, PSMC3, PSMD11, PSMD10, PSMC2, IKBKG, PSMC1	2630	105	16792	3.10118	6.67171e-11	4.16978e-12	2.40252e-11
GO:0070979~protein K11-linked ubiquitination	13	0.453278	0.000365235	UBE2E3, UBE2D3, UBE2A, ANAPC5, RNF4, ANAPC13, UBE2W, CDC23, ANAPC11, UBE2H, UBE2L3, UBE2B, UBE2E2	2630	27	16792	3.07416	0.85668	0.023991	0.697261
GO:0006364~rRNA processing	103	3.59135	1.48078e-28	RPP38, RPL17, RPL36A, RPL14, ISG20, DDX27, CDKN2A, RPL26L1, RPP30, RPL11, DDX21, IMP4, RRP1, EMG1, RRP7A, BYSL, RRP9, DIS3L, MRM2, MRTO4, MRM3, RCL1, PA2G4, RPS16, RIOK3, RPS13, XRN2, BOP1, PIN4, RIOK2, DDX47, WDR55, DDX49, RPL6, RPL9, RPL8, RPL5, RPL7A, RPL4, RPS20, RPS23, RPS24, RPSA, TBL3, CCDC86, NOC4L, RPS6, RPS5, RPS7, DDX56, NOLC1, RPL18A, WDR3, YBEY, POP4, UTP14A, DDX52, RPP40, DDX51, UTP…	2630	214	16792	3.07305	7.87481e-25	2.62494e-25	2.83631e-25
GO:0002181~cytoplasmic translation	12	0.41841	0.000712344	MRPL2, RPL36A, RPL22, RPL6, EIF4H, RPL9, RPL7L1, RPL8, RPL26L1, EIF3J, FTSJ1, MRTO4	2630	25	16792	3.0647	0.977395	0.041686	1.35565
GO:0000027~ribosomal large subunit assembly	10	0.348675	0.0027196	RPL6, BRIX1, RPL5, RPL24, RPL11, RSL24D1, RPF2, RPF1, MRPL20, MRTO4	2630	21	16792	3.04038	0.999999	0.123361	5.08254
GO:0006120~mitochondrial electron transport, NADH to ubiquinone	23	0.801953	1.1692e-06	NDUFB3, NDUFA8, NDUFB7, NDUFA9, NDUFA6, NDUFB9, NDUFA7, NDUFAB1, COQ9, NDUFA10, NDUFAF1, NDUFA12, NDUFA11, NDUFV3, NDUFS7, NDUFS6, NDUFS4, NDUFV1, NDUFV2, NDUFS8, DLD, NDUFS3, NDUFS2	2630	49	16792	2.99694	0.0061985	0.000141303	0.00223947
GO:0090141~positive regulation of mitochondrial fission	7	0.244073	0.020491	FIS1, MFF, MIEF1, MUL1, PINK1, VPS35, MARCH5	2630	15	16792	2.97957	1	0.476734	32.7373
GO:0000245~spliceosomal complex assembly	12	0.41841	0.00106135	SRPK2, TXNL4B, GEMIN2, SNRPD3, USP39, DDX1, SNRPD1, LSM4, SNRPD2, ZRSR2, GCFC2, TXNL4A	2630	26	16792	2.94683	0.996473	0.0559963	2.01346
GO:0048747~muscle fiber development	6	0.209205	0.0402619	UCHL1, LEF1, FLNC, AFG3L2, CAPZB, SGCB	2630	13	16792	2.94683	1	0.673958	54.4853
GO:0001522~pseudouridine synthesis	6	0.209205	0.0402619	PUS3, DKC1, PUSL1, RPUSD1, NOP10, TRUB2	2630	13	16792	2.94683	1	0.673958	54.4853
GO:0060334~regulation of interferon-gamma-mediated signaling pathway	6	0.209205	0.0402619	SUMO1, JAK1, STAT1, IFNGR2, CDC37, IFNGR1	2630	13	16792	2.94683	1	0.673958	54.4853
GO:0032981~mitochondrial respiratory chain complex I assembly	29	1.01116	5.47903e-08	NDUFB3, NDUFAF4, NDUFAF7, NDUFAF8, NDUFB7, NDUFB9, NDUFAB1, NDUFAF1, NDUFAF2, NDUFAF3, NDUFS7, NDUFS6, NDUFS4, NDUFS8, NDUFS3, NDUFS2, NDUFA8, NDUFA9, NDUFA6, NDUFA7, BCS1L, ECSIT, NDUFA10, TIMM21, NDUFA12, NDUFA11, NDUFV3, NDUFV1, NDUFV2	2630	63	16792	2.93903	0.000291332	9.10543e-06	0.000104946
GO:0022904~respiratory electron transport chain	9	0.313808	0.00767263	SDHA, SDHB, NDUFS6, PINK1, ETFB, NDUFAF2, SCO2, ETFA, SOD2	2630	20	16792	2.87316	1	0.261704	13.7163
GO:0043928~exonucleolytic nuclear-transcribed mRNA catabolic process involved in deadenylation-dependent decay	13	0.453278	0.000803644	EXOSC8, CNOT8, EXOSC6, EXOSC4, EXOSC5, EXOSC2, EXOSC3, EXOSC1, CNOT7, LSM5, LSM4, LSM3, LSM1	2630	29	16792	2.86215	0.986095	0.0454095	1.52813
GO:0070936~protein K48-linked ubiquitination	21	0.732218	9.7051e-06	UBE2A, UBE3A, UBE2G1, UBE2G2, RNF187, RNF216, UBE2H, UBE2Q2, ZNRF1, UBE2B, UBE2E3, RNF126, BFAR, UBE2D3, RNF115, UBE2D2, RNF4, UBE2K, NEDD4L, UBE2D1, UBE2E2	2630	47	16792	2.85278	0.0503027	0.000973336	0.0185876
GO:0042254~ribosome biogenesis	16	0.55788	0.000166771	NOC4L, SNU13, BOP1, NVL, MRPL10, RCL1, RRN3, URB2, MRPL36, AATF, RPL7A, RSL24D1, GNL2, PES1, GNL1, GNL3	2630	36	16792	2.83768	0.588095	0.0125909	0.318952
GO:0043161~proteasome-mediated ubiquitin-dependent protein catabolic process	90	3.13808	5.85011e-22	MAEA, UCHL1, RNF187, RNF216, ZNRF1, RNF181, CUL3, C18ORF25, RMND5A, BTBD1, SHARPIN, UBXN2B, PSMD1, RNF38, PSMD2, PSMD3, PSMD4, PSMD5, PSMD6, PSMD7, CUL1, PSMD8, TBL1XR1, UBE2A, ANAPC5, UBE2H, UBE2B, PSMA2, PSMA1, PSMA6, PSME1, PSMA5, UBE2K, PSME2, PSMA4, PSMA3, RNF24, UBE2W, PSME3, TNFAIP1, PSMB10, ANAPC16, RAD23A, ANAPC15, PML, ANAPC11, PSMA7, STUB1, RBX1, PSMB5, PSMF1, RNF126, PSMB7, UBE2D3, PS…	2630	203	16792	2.8307	3.11109e-18	6.22218e-19	1.12054e-18
GO:0000462~maturation of SSU-rRNA from tricistronic rRNA transcript (SSU-rRNA, 5.8S rRNA, LSU-rRNA)	14	0.488145	0.000605274	TBL3, NOC4L, RRP36, UTP18, EMG1, BYSL, MRPS11, UTP6, BMS1, DCAF13, RPS16, WDR3, WDR46, RPS24	2630	32	16792	2.79335	0.960038	0.0376059	1.153
GO:0061024~membrane organization	14	0.488145	0.000605274	RAB8A, YWHAZ, YWHAB, PRKCI, YWHAG, YWHAH, YWHAQ, RAB14, RALA, GNPAT, SGCE, TBC1D1, RAB10, SGCB	2630	32	16792	2.79335	0.960038	0.0376059	1.153
GO:0006409~tRNA export from nucleus	14	0.488145	0.000605274	XPOT, NUP153, RAN, NUP93, NUP188, NUPL2, NUP62, RAE1, SEH1L, NUP205, NUP50, NUP37, NUP107, NUP35	2630	32	16792	2.79335	0.960038	0.0376059	1.153
GO:0061136~regulation of proteasomal protein catabolic process	7	0.244073	0.0285347	GPX1, PSMD14, PSME1, PSME2, PINK1, PSME3, USP14	2630	16	16792	2.79335	1	0.574846	42.5644
GO:0043162~ubiquitin-dependent protein catabolic process via the multivesicular body sorting pathway	7	0.244073	0.0285347	MVB12A, RNF126, RNF115, TSG101, VPS4A, VPS28, UBAP1	2630	16	16792	2.79335	1	0.574846	42.5644
GO:0016226~iron-sulfur cluster assembly	7	0.244073	0.0285347	CIAO1, NFU1, ISCA2, FXN, NUBP1, HSCB, CIAPIN1	2630	16	16792	2.79335	1	0.574846	42.5644
GO:1903506~regulation of nucleic acid-templated transcription	7	0.244073	0.0285347	RALY, NMI, RAP2C, ACTN4, ACTN1, ARL2BP, AIP	2630	16	16792	2.79335	1	0.574846	42.5644
GO:0007220~Notch receptor processing	7	0.244073	0.0285347	NCSTN, ADAM10, APH1A, ADAM17, PSENEN, JAG1, GALNT11	2630	16	16792	2.79335	1	0.574846	42.5644
GO:0000715~nucleotide-excision repair, DNA damage recognition	10	0.348675	0.00562797	COPS2, CUL4A, COPS5, COPS6, COPS3, COPS4, COPS7A, CETN2, COPS8, RBX1	2630	23	16792	2.776	1	0.213461	10.2465
GO:0016239~positive regulation of macroautophagy	10	0.348675	0.00562797	HIF1A, SQSTM1, ATG7, HMOX1, PINK1, SCOC, WAC, PAFAH1B2, GBA, LARP1	2630	23	16792	2.776	1	0.213461	10.2465
GO:0030433~ER-associated ubiquitin-dependent protein catabolic process	26	0.906555	1.23936e-06	DERL2, DERL1, UBE2G2, MAN1B1, RNF185, UBQLN2, UBQLN1, OS9, STT3B, HSPA5, AUP1, JKAMP, UBE2J1, CCDC47, SELENOS, UBE2J2, HSP90B1, PSMC6, PSMC5, SEC61B, PSMC4, PSMC3, PSMC2, PSMC1, FAF2, SEL1L	2630	60	16792	2.76674	0.00656926	0.000146454	0.00237386
GO:0002474~antigen processing and presentation of peptide antigen via MHC class I	13	0.453278	0.0011503	SEC23A, HLA-H, SEC31A, PDIA3, TAP1, SEC13, HLA-C, CALR, SEC24D, CANX, HLA-G, TAPBP, BCAP31	2630	30	16792	2.76674	0.997803	0.0599539	2.18044
GO:0070534~protein K63-linked ubiquitination	16	0.55788	0.000240158	TRAF2, UBE2G1, TRIM27, UBE2V1, UBE2F, UBE2V2, UBE2B, STUB1, UBE2N, RNF126, BFAR, UBE2E3, RNF115, CDKN2A, RNF4, UBE2E2	2630	37	16792	2.76099	0.721214	0.0168866	0.458999
GO:0016241~regulation of macroautophagy	19	0.662483	5.08385e-05	SNX6, UCHL1, ATP6V1H, ATP6V1G1, UBQLN2, ATP6V1B2, ATP6V1D, CDK5, ATP6V0B, ATP6V1C1, ATP6V1A, CASP3, SH3GLB1, ATP6V1E1, VPS35, ATP6V0D1, VPS26A, ATP6V0A2, GBA	2630	44	16792	2.75707	0.2369	0.00421556	0.0973317
GO:0006378~mRNA polyadenylation	12	0.41841	0.00218134	ZC3H3, TUT1, PAPOLA, APP, NUDT21, GRSF1, CPSF6, CDC73, PAF1, CPSF3, CSTF1, SSU72	2630	28	16792	2.73634	0.999991	0.103769	4.09645
GO:0048208~COPII vesicle coating	26	0.906555	1.78938e-06	PPP6C, SEC31A, BET1, RAB1B, TFG, LMAN1, RAB1A, CUL3, TMED2, TRAPPC6B, SEC22B, TMED10, SEC24D, SEC23A, SCFD1, CNIH3, CD59, MCFD2, TRAPPC5, KLHL12, SEC13, TRAPPC4, CTSC, GOSR2, CNIH1, TRAPPC3	2630	61	16792	2.72139	0.00947081	0.000202446	0.00342735
GO:0006370~7-methylguanosine mRNA capping	14	0.488145	0.000856835	NCBP2, POLR2F, RNMT, POLR2E, POLR2K, CMTR2, CDK7, GTF2H5, POLR2D, POLR2C, POLR2B, GTF2H2, GTF2F1, ERCC3	2630	33	16792	2.7087	0.989523	0.0468522	1.62849
GO:0006027~glycosaminoglycan catabolic process	11	0.383543	0.00412508	GPC4, GNS, SGSH, HYAL2, SDC1, IDS, HSPG2, SDC4, GPC1, SDC2, GLB1	2630	26	16792	2.70126	1	0.168669	7.61223
GO:0070584~mitochondrion morphogenesis	8	0.27894	0.0203457	FIS1, MFF, NDUFS6, PANK2, PNPT1, POLDIP2, BCL2L1, SLIRP	2630	19	16792	2.68833	1	0.476297	32.5459
GO:0000209~protein polyubiquitination	77	2.6848	3.50347e-17	RUSC1, ZNRF1, RNF181, CBFB, CUL3, CDKN2A, C18ORF25, PSMD1, PSMD2, PSMD3, PSMD4, PSMD5, PSMD6, PSMD7, FBXO22, PSMD8, CUL1, UBE2A, DTX3L, UBE2J2, UBE2B, PSMA2, PSMA1, PSMA6, HUWE1, PSME1, PSMA5, PSME2, PSMA4, PSMA3, RNF138, RNF24, PSME3, PSMB10, UBE2V1, UBE2V2, PSMA7, STUB1, RBX1, PSMB5, PSMF1, RNF126, PSMB7, UBE2D3, PSMB6, UBE2D2, PSMB1, PSMB3, PSMB2, KLHL42, FBXO3, NEDD4L, UBE2D1, FBXW11, TRIP12,…	2630	184	16792	2.6719	1.86314e-13	1.43319e-14	6.71058e-14
GO:1901998~toxin transport	15	0.523013	0.000637008	TCP1, NRP1, COPZ1, SLC7A8, CCT2, CCT3, CCT7, COPB2, SCFD1, CCT5, CCT4, CD274, CCT8, HSPA5, CASP1	2630	36	16792	2.66033	0.966247	0.0386371	1.2131
GO:0006413~translational initiation	57	1.98745	1.0297e-12	EIF6, RPL17, RPL36A, RPL14, COPS5, EIF5B, EIF2A, RPS3, LARP1, EIF1AX, RPL26L1, RPL11, EIF2B2, EIF2B3, EIF2B4, ABCE1, EIF2S3, RPS4X, EIF4G2, RPS16, EIF2S1, EIF2S2, RPS13, EIF3D, EIF3A, EIF3B, EIF3G, RPL6, EIF3H, RPL9, EIF3E, RPL8, EIF3K, EIF3L, EIF3I, RPL5, RPS20, RPL7A, EIF3J, RPL4, RPS23, EIF3M, RPS24, RPSA, EIF1AD, PAIP1, RPL24, RPS6, EIF2B1, RPS5, RPS7, EIF4E, RPL18A, RPL13A, RPL22, EIF4H, EIF…	2630	137	16792	2.65645	5.47611e-09	2.88217e-10	1.97236e-09
GO:0006672~ceramide metabolic process	7	0.244073	0.0384054	PPP2R1A, PLA2G15, PPP2CA, ORMDL1, ORMDL2, CERK, ASAH1	2630	17	16792	2.62903	1	0.665839	52.7689
GO:2000811~negative regulation of anoikis	7	0.244073	0.0384054	CAV1, PTK2, MCL1, ITGA5, BCL2L1, PTRH2, ITGB1	2630	17	16792	2.62903	1	0.665839	52.7689
GO:0090201~negative regulation of release of cytochrome c from mitochondria	7	0.244073	0.0384054	PRELID1, GPX1, TRIAP1, NOL3, FXN, PSMD10, BCL2L1	2630	17	16792	2.62903	1	0.665839	52.7689
GO:0006090~pyruvate metabolic process	9	0.313808	0.0145781	SLC16A1, LDHA, ME3, ME2, DLD, GLO1, DLAT, PDHA1, PDHX	2630	22	16792	2.61196	1	0.393847	24.5188
GO:0006509~membrane protein ectodomain proteolysis	9	0.313808	0.0145781	NCSTN, HM13, ADAM10, APH1A, BACE2, ADAM17, PSENEN, MYH9, ADAM9	2630	22	16792	2.61196	1	0.393847	24.5188
GO:0039702~viral budding via host ESCRT complex	9	0.313808	0.0145781	CHMP2A, MVB12A, CHMP1A, TSG101, CHMP4A, CHMP7, VPS4A, PDCD6IP, VPS28	2630	22	16792	2.61196	1	0.393847	24.5188
GO:0090383~phagosome acidification	11	0.383543	0.00564575	ATP6V1C1, ATP6V1A, ATP6V1E1, ATP6V1H, ATP6V1B2, RAB38, ATP6V1G1, ATP6V0D1, ATP6V1D, ATP6V0A2, ATP6V0B	2630	27	16792	2.60121	1	0.212555	10.2772
GO:0033209~tumor necrosis factor-mediated signaling pathway	48	1.67364	1.93513e-10	PSMB10, TRAF2, TNFRSF21, TNFRSF12A, PSMA7, PSMB5, PSMF1, TNFRSF1A, PSMB7, PSMB6, PSMB1, PSMB3, PSMB2, PSMD1, PSMD2, PSMD3, PSMD4, FAS, PSMD5, PSMD6, PSMD7, PSMD8, STAT1, PSMB8, TRADD, PSMB9, PSMA2, PSMA1, PSMC6, PSMD14, PSMD13, PSMC5, PSMA6, TXNDC17, PSMD12, PSMC4, PSME1, PSMA5, PSMD11, PSMC3, PSME2, PSMA4, PSMC2, PSMD10, PSMA3, PSMC1, ADAM17, PSME3	2630	118	16792	2.5972	1.0291e-06	4.11641e-08	3.70657e-07
GO:0006888~ER to Golgi vesicle-mediated transport	65	2.26639	8.3933e-14	COPA, IER3IP1, SEC31A, NRBP1, VAPA, VAPB, DYNC2LI1, ATL3, RAB1B, RAB1A, CUL3, COPB2, TRAPPC6B, SEC24D, KDELR1, SEC23A, VTI1B, DCTN5, DCTN6, DCTN3, YIF1B, YIF1A, DCTN4, ERGIC1, DCTN1, DCTN2, BCAP31, COPG1, ARCN1, KLHL12, VAMP4, TRAPPC4, CTSC, PROS1, COPE, TRAPPC3, DYNC1I2, SEC23B, ARFGAP2, ARFGAP3, COPZ1, BET1, LMAN2, LMAN1, TMED7, TMED2, TMED3, BCAP29, TMED10, SEC22B, TEX261, RAB2A, TMED9, TMEM11…	2630	160	16792	2.59382	4.46355e-10	2.47975e-11	1.60771e-10
GO:0032212~positive regulation of telomere maintenance via telomerase	13	0.453278	0.00221634	TCP1, MAPKAPK5, PKIB, CCT2, CCT3, CCT6A, CCT7, MAPK1, CCT5, CCT4, ACD, DKC1, CCT8	2630	32	16792	2.59382	0.999992	0.104413	4.16087
GO:0061077~chaperone-mediated protein folding	15	0.523013	0.000878569	FKBP9, FKBP4, TTC9C, CRTAP, FKBP3, FKBP1A, PDIA4, CALR, CANX, P3H1, TRAP1, CSNK2A1, PEX19, TOR1A, FKBP10	2630	37	16792	2.58843	0.990668	0.0475241	1.66947
GO:0006412~translation	102	3.55649	4.73891e-21	MRPS36, RPL17, RPL36A, MRPL42, MRPS33, MRPL41, RPL14, HBS1L, MRPS30, MRPL36, RPL26L1, MRPL37, RPL11, MRPL32, RMND1, MRPL35, RPL36AL, MRPL52, MRPL51, DARS, EFTUD2, RSL1D1, SLC25A32, RPS16, MRPS18B, MRPS18A, HARS, SLC25A38, MRPL49, RPS13, PELO, YARS2, MRPL43, GATB, MRPS17, MRPS16, MRPS15, MRPS14, MRPS12, PABPC4, MRPS11, RPL6, RPL9, HARS2, RPL8, RPL5, RPL7A, RPL4, RPS20, RPS23, RPS24, RPSA, MRPS23, …	2630	253	16792	2.57411	2.52015e-17	4.20025e-18	9.07695e-18
GO:0045454~cell redox homeostasis	31	1.08089	6.31211e-07	TMX2, GLRX3, TMX1, GLRX5, PTGES2, PDIA3, TMX3, PRDX4, PDIA6, PDIA4, PRDX3, GLRX2, GPX1, NOS2, QSOX1, APEX1, SCO2, GLRX, TXNL1, P4HB, TXNDC9, SELENOS, ERP44, TXNDC12, PRDX6, TXNDC5, TXNDC15, TXN, DLD, TXNRD1, SH3BGRL3	2630	77	16792	2.5705	0.00335116	8.83325e-05	0.00120902
GO:0034976~response to endoplasmic reticulum stress	30	1.04603	1.16265e-06	TMX1, TRAF2, PDIA3, TMX3, UFC1, PDIA6, UBA5, PDIA4, UBQLN1, OS9, SRPX, UFM1, XBP1, TMEM33, TARDBP, PPP2CB, THBS1, FAM129A, P4HB, MBTPS2, DDRGK1, NRBF2, CREB3, FLOT1, EEF2, HYOU1, ERP44, HSP90B1, TXNDC5, EIF2S1	2630	75	16792	2.55392	0.0061639	0.00014378	0.00222693
GO:0018279~protein N-linked glycosylation via asparagine	16	0.55788	0.000648243	OSTC, ST6GAL1, UBE2G2, UBE2J1, ALG5, LMAN1, STT3B, MGAT2, STT3A, ST3GAL5, MCFD2, RPN1, DPM1, DPM2, RPN2, DDOST	2630	40	16792	2.55392	0.968206	0.0384293	1.23437
GO:0097193~intrinsic apoptotic signaling pathway	12	0.41841	0.00410761	CUL3, MSH6, APOPT1, HRAS, CASP4, NOL3, CUL4A, CYCS, MLLT11, DIABLO, CD24, CUL1	2630	30	16792	2.55392	1	0.169313	7.58118
GO:0006362~transcription elongation from RNA polymerase I promoter	12	0.41841	0.00410761	TAF1B, CD3EAP, POLR2F, POLR2E, UBTF, POLR1E, POLR2K, POLR1C, CDK7, GTF2H5, ERCC3, GTF2H2	2630	30	16792	2.55392	1	0.169313	7.58118
GO:0000375~RNA splicing, via transesterification reactions	10	0.348675	0.0104877	BCAS2, SRSF4, GEMIN2, SNRNP40, LSM1, PRPF4, SF3B4, SF3B3, SF3A3, TXNL4A	2630	25	16792	2.55392	1	0.318889	18.2859
GO:0015949~nucleobase-containing small molecule interconversion	10	0.348675	0.0104877	NME2, NME1-NME2, DTYMK, TXN, CTPS1, AK2, TXNRD1, AK4, CMPK1, GLRX	2630	25	16792	2.55392	1	0.318889	18.2859
GO:0006541~glutamine metabolic process	8	0.27894	0.0271697	GLS2, NIT2, GLS, GFPT2, CTPS1, ASNSD1, ASNS, GMPS	2630	20	16792	2.55392	1	0.562909	40.9987
GO:0006383~transcription from RNA polymerase III promoter	13	0.453278	0.0029932	POLR3F, GTF3A, POLR2F, POLR2E, POLR3K, POLR2K, GTF3C6, POLR3A, POLR1C, POLR3C, GTF3C2, POLR3E, POLR3D	2630	33	16792	2.51522	1	0.131578	5.58007
GO:0006361~transcription initiation from RNA polymerase I promoter	13	0.453278	0.0029932	TAF1B, CD3EAP, POLR2F, POLR2E, UBTF, POLR1E, RRN3, POLR2K, POLR1C, CDK7, GTF2H5, ERCC3, GTF2H2	2630	33	16792	2.51522	1	0.131578	5.58007
GO:0051881~regulation of mitochondrial membrane potential	11	0.383543	0.00757042	TUSC2, PRELID1, BAK1, PANK2, MUL1, PINK1, CLIC1, PRDX3, BCL2L1, PARK7, SOD2	2630	28	16792	2.50831	1	0.262032	13.5459
GO:0006513~protein monoubiquitination	11	0.383543	0.00757042	CUL3, RNF126, UBE2D3, HUWE1, TSG101, KLHL12, UBE2W, NEDD4L, UBE2B, CUL1, RBX1	2630	28	16792	2.50831	1	0.262032	13.5459
GO:0032481~positive regulation of type I interferon production	20	0.69735	0.000142707	XRCC5, IRAK1, POLR3F, DHX9, POLR2F, POLR2E, POLR3K, POLR2K, TBK1, XRCC6, PRKDC, POLR3A, POLR1C, IFI16, POLR3C, POLR3E, POLR3D, IRF3, LRRFIP1, DDX41	2630	51	16792	2.50384	0.531852	0.0110993	0.272989
GO:0050852~T cell receptor signaling pathway	58	2.02232	1.18185e-11	HRAS, BCAR1, STOML2, PTEN, MAP3K7, PSMD1, PSMD2, PSMD3, PSMD4, PSMD5, PSMD6, CSK, PSMD7, PSMD8, CUL1, BCL10, PDE4D, THY1, PSMA2, UBE2N, PSMA1, MAPK1, PSMA6, PSME1, PSMA5, PSME2, PSMA4, PSMA3, RIPK2, PSME3, PSMB10, TNFRSF21, UBE2V1, PSMA7, PSMB5, PSMF1, PSMB7, UBE2D2, PSMB6, PSMB1, PSMB3, PSMB2, UBE2D1, FBXW11, PSMB8, PSMB9, PSMC6, PSMD14, PSMC5, PSMD13, PSMC4, PSMD12, PSMC3, PSMD11, PSMD10, PSMC2…	2630	148	16792	2.50215	6.2851e-08	2.99291e-09	2.26374e-08
GO:0006479~protein methylation	9	0.313808	0.0193516	ARMT1, LCMT1, PRMT1, PRMT2, GSPT1, SNRPD3, SNRPB, PCMT1, ETF1	2630	23	16792	2.4984	1	0.465288	31.2226
GO:0006890~retrograde vesicle-mediated transport, Golgi to ER	32	1.11576	8.96466e-07	COPA, ARFGAP2, ARFGAP3, COPZ1, PITPNB, RAB1B, RER1, LMAN2, RAB1A, TAPBP, COPB2, TMED7, TMED2, TMED3, KLC1, KIFAP3, SEC22B, TMED10, KDELR1, KDELR2, RINT1, TMED9, ERGIC2, TMEM115, COG4, SCFD1, COPG1, GOLPH3, ARCN1, ARF4, SURF4, COPE	2630	82	16792	2.49163	0.00475606	0.000119178	0.00171709
GO:0006363~termination of RNA polymerase I transcription	12	0.41841	0.00548009	TAF1B, CD3EAP, POLR2F, POLR2E, UBTF, POLR1E, POLR2K, POLR1C, CDK7, GTF2H5, ERCC3, GTF2H2	2630	31	16792	2.47153	1	0.20996	9.99049
GO:0090263~positive regulation of canonical Wnt signaling pathway	46	1.60391	4.51852e-09	PSMB10, CAV1, PSMA7, PIN1, PSMB5, PSMF1, PSMB7, PSMB6, PSMB1, PSMB3, PSMB2, ILK, PSMD1, PSMD2, PSMD3, VPS35, PSMD4, PSMD5, PSMD6, PSMD7, PSMD8, WLS, PSMB8, PSMB9, PSMA2, PSMA1, PSMC6, PSMD14, PSMD13, PSMC5, PSMA6, PSMD12, SULF2, PSMC4, PSME1, CSNK1E, PSMA5, PSMD11, PSMC3, PSME2, PSMA4, PSMC2, PSMD10, PSMA3, PSMC1, PSME3	2630	120	16792	2.4475	2.40292e-05	8.00983e-07	8.65482e-06
GO:0007369~gastrulation	8	0.27894	0.0353942	RACK1, CUL3, DLD, TGFBR2, SUPT20H, SMAD2, EXT1, RPS6	2630	21	16792	2.4323	1	0.641133	49.8541
GO:0048025~negative regulation of mRNA splicing, via spliceosome	8	0.27894	0.0353942	RBM42, SRSF4, HNRNPK, C1QBP, SRSF9, PTBP1, SAP18, RNPS1	2630	21	16792	2.4323	1	0.641133	49.8541
GO:0051865~protein autoubiquitination	19	0.662483	0.000347902	TRAF2, UBE2A, UBE3A, RNF185, RNF187, RNF181, STUB1, UBE2B, MARCH5, BFAR, UBE2D3, RNF115, UBE2D2, RNF4, RNF11, MDM2, RNF10, RCHY1, RNF13	2630	50	16792	2.42622	0.842836	0.0231514	0.664276
GO:0006283~transcription-coupled nucleotide-excision repair	28	0.97629	9.68112e-06	COPS2, POLR2F, POLR2E, COPS5, POLR2K, COPS6, COPS3, COPS4, COPS7A, COPS8, POLR2D, POLR2C, POLR2B, RBX1, RPA2, ISY1, ERCC3, ERCC1, POLK, CDK7, GTF2H5, GTF2H2, POLD3, POLD4, AQR, CUL4A, RFC2, POLD2	2630	74	16792	2.41587	0.0501816	0.000989595	0.0185417
GO:0010467~gene expression	18	0.627615	0.000626752	NCBP2, POLR2F, POLR2E, POLR2K, PTBP1, POLR2D, WTAP, POLR2C, HNRNPR, HNRNPA0, HNRNPU, POLR2B, HNRNPK, GTF2F1, GOLPH3, HNRNPF, FAS, HNRNPC	2630	48	16792	2.3943	0.964354	0.0384655	1.19368
GO:0070911~global genome nucleotide-excision repair	12	0.41841	0.00718967	SUMO3, UBE2N, SUMO1, CUL4A, CETN2, UBE2V2, UBE2I, GTF2H5, ERCC3, GTF2H2, ERCC1, RBX1	2630	32	16792	2.3943	1	0.252262	12.9083
GO:0036498~IRE1-mediated unfolded protein response	22	0.767085	0.000138841	TLN1, EXTL3, SEC31A, MYDGF, HDGF, PDIA6, SRPRA, SRPRB, YIF1A, DCTN1, CXXC1, SSR1, HYOU1, SEC61B, TPP1, XBP1, GOSR2, SHC1, HSPA5, ATP6V0D1, SEC61A1, SERP1	2630	59	16792	2.38077	0.522125	0.0109605	0.265602
GO:0042542~response to hydrogen peroxide	19	0.662483	0.000459827	LDHA, PDCD10, STK25, APTX, EEF2, PRDX3, STAT1, GLRX2, SOD2, GPX1, BAK1, CASP3, SDC1, HMOX1, PPP2CB, HSPD1, PPP1R15B, FOSL1, ADAM9	2630	51	16792	2.37865	0.913354	0.0293879	0.877091
GO:0048013~ephrin receptor signaling pathway	32	1.11576	2.93051e-06	HRAS, APH1A, AP2S1, ARPC4, ARPC5, SDC2, EPHB2, ACTR3, ACTR2, CDC42, PTK2, AP2B1, ARPC3, TIAM1, ARPC2, PSENEN, YES1, AP2M1, ACTB, ADAM10, LYN, ROCK2, EFNB1, EFNB2, MYL12A, ARPC1A, NCSTN, SS18, ARPC1B, SIPA1L1, SDCBP, CRK	2630	86	16792	2.37574	0.0154637	0.000311641	0.00561298
GO:0033572~transferrin transport	13	0.453278	0.00520313	ATP6AP1, ATP6V1H, ATP6V1B2, ATP6V1G1, CLTC, ATP6V1D, ATP6V0B, ATP6V1C1, ATP6V1A, ATP6V1E1, ATP6V0D1, ATP6V0A2, DNM2	2630	35	16792	2.37149	1	0.201922	9.50916
GO:0031648~protein destabilization	13	0.453278	0.00520313	BMP2, DERL1, MUL1, PRKDC, CDC73, TMEM147, CDKN2A, PEX2, XBP1, GSN, MDM2, FBXW11, NCLN	2630	35	16792	2.37149	1	0.201922	9.50916
GO:0016192~vesicle-mediated transport	56	1.95258	4.3301e-10	CCZ1B, CLTA, CLTB, AP2S1, AP3S2, AP3S1, CLTC, VPS33A, RAB1A, COPB2, AP2B1, BLZF1, AP1S1, ACTR1A, ZFPL1, VPS4A, JAGN1, SAR1A, CLINT1, SEC23A, STX1A, GOLT1B, PRKCI, VTI1B, OPTN, ERGIC3, TRAPPC11, CHMP1A, COPG1, RAB14, VAMP5, VAMP4, VAMP3, RAB10, SEC23B, AP1M1, ARFGAP3, COPZ1, ARF6, SFT2D1, STX12, AP3M1, PLIN3, AP3D1, SEC22B, RAB11A, TRIP10, VPS39, AP2M1, VPS18, GDI2, KXD1, GOSR2, YIPF5, CPNE3, YKT6	2630	152	16792	2.35229	2.30275e-06	8.5287e-08	8.29392e-07
GO:0090090~negative regulation of canonical Wnt signaling pathway	60	2.09205	9.99012e-11	TMEM64, CUL3, DAB2, PSMD1, PSMD2, PSMD3, PSMD4, PSMD5, PSMD6, PSMD7, PSMD8, DRAXIN, G3BP1, LEF1, PSMA2, PSMA1, PSMA6, PSME1, PSMA5, PSME2, PSMA4, PSMA3, KLHL12, PSME3, MCC, MAD2L2, PSMB10, CAV1, CTNND1, CDH2, PSMA7, SDHAF2, RBX1, PSMB5, PSMF1, PSMB7, PSMB6, PSMB1, PSMB3, PSMB2, MLLT3, CSNK1A1, BMP2, WWTR1, PSMB8, PSMB9, DKK3, PSMC6, PSMD14, PSMC5, PSMD13, PSMC4, PSMD12, PSMC3, PSMD11, PSMC2, PSMD…	2630	163	16792	2.35023	5.31274e-07	2.21364e-08	1.91352e-07
GO:0045739~positive regulation of DNA repair	11	0.383543	0.0128917	EYA3, UBE2N, NPAS2, BRCC3, CEBPG, TMEM161A, BABAM1, UBE2V2, APEX1, RPS3, TIGAR	2630	30	16792	2.34109	1	0.366806	22.0057
GO:0030521~androgen receptor signaling pathway	15	0.523013	0.00274436	RAN, UBE3A, FKBP4, FHL2, CDK7, KAT5, DAXX, NRIP1, RNF4, NCOA4, MED16, THRAP3, TGFB1I1, PMEPA1, RNF14	2630	41	16792	2.3359	1	0.123363	5.12766
GO:0098609~cell-cell adhesion	99	3.45188	5.00757e-17	CAST, LDHA, SEPT2, VAPA, RPL14, CHMP5, VAPB, CAPZA1, IQGAP1, RAB1A, SND1, LRRC59, DBNL, TWF1, TWF2, KIF5B, RAN, BAIAP2, OLA1, LYPLA2, EIF2S3, EEF2, TXNDC9, RSL1D1, UBFD1, RARS, SERBP1, SDCBP, RAB10, SH3GL1, HDLBP, PPME1, GIPC1, TAGLN2, CAPZB, PFN1, PSMB6, CDC42EP1, HNRNPK, RPL6, EIF3E, NUMB, RPL7A, NUDC, ZC3H15, CKAP5, PPFIBP1, ARFIP2, S100A11, EPS15, CORO1B, EIF4H, CCT8, TMOD3, LIMA1, ABCF3, EIF…	2630	271	16792	2.33245	2.66302e-13	1.90216e-14	9.59154e-14
GO:0010827~regulation of glucose transport	12	0.41841	0.0092879	NUP153, NUP62, SEH1L, RAE1, NUP205, NUP50, NUP93, NUP37, NUP188, NUP107, NUPL2, NUP35	2630	33	16792	2.32174	1	0.296679	16.3671
GO:0006614~SRP-dependent cotranslational protein targeting to membrane	34	1.1855	2.78829e-06	RPL17, RPL36A, RPL14, SRP19, RPS3, RPL6, RPL9, RPL8, RPL26L1, RPL5, RPL11, RPL4, RPL7A, RPS20, SEC61A1, RPS23, RPS24, RPSA, SRP54, RPL24, SRPRA, SRPRB, RPS4X, RPS6, RPS5, RPS7, RPS16, RPL18A, RPL22, RPL13A, RPS13, SRP72, SRP9, SSR3	2630	94	16792	2.30939	0.0147187	0.000308872	0.00534058
GO:0006457~protein folding	65	2.26639	3.95693e-11	GRPEL2, GRPEL1, PDIA3, VBP1, PDIA6, CCT2, PDIA4, CCT3, PRKCSH, CANX, AIP, NUDCD3, CSNK2A1, BAG3, GNG2, PDRG1, TXNL1, AARS, CCT6A, ST13, TRAP1, PFDN2, PDCL3, PFDN1, TBCA, GNB1, TXNDC5, MLEC, TXN, PFDN4, GNB5, SIL1, RUVBL2, FKBP10, FKBP9, TMX1, FKBP4, PPIL1, TMX3, FKBP1A, LMAN1, CALR, HSCB, CDC37, P3H1, TTC1, MPDU1, PPIL4, PPIL3, CDC37L1, NUDC, HSPA9, TCP1, SPHK1, CSNK2B, DNLZ, CCT7, HSPBP1, ERP44,…	2630	180	16792	2.30562	2.1043e-07	9.56499e-09	7.57915e-08
GO:0032436~positive regulation of proteasomal ubiquitin-dependent protein catabolic process	23	0.801953	0.000174569	CSNK1A1, NUB1, USP5, UBE2V2, KEAP1, IL33, CBFA2T3, STUB1, TRIB1, HSPBP1, RACK1, SUMO1, RNF114, DAB2, PLK2, CSNK1E, ZFAND2A, PSMD10, MDM2, RNF138, RCHY1, FBXO22, RNF14	2630	64	16792	2.29453	0.60483	0.0129915	0.333842
GO:0090503~RNA phosphodiester bond hydrolysis, exonucleolytic	10	0.348675	0.0228835	USB1, CNOT8, EXOSC4, PNPT1, REXO2, EXOSC5, DIS3L, CNOT7, XRN2, ISG20	2630	28	16792	2.28028	1	0.511173	35.8153
GO:0034605~cellular response to heat	13	0.453278	0.00854669	IRAK1, SUMO1, HDAC2, HSF1, STAC, LYN, EIF2S1, HMOX1, CLPB, HIKESHI, THBS1, PDCD6, MYOF	2630	37	16792	2.2433	1	0.27992	15.1604
GO:0006368~transcription elongation from RNA polymerase II promoter	30	1.04603	2.63594e-05	NCBP2, ENY2, POLR2F, POLR2E, POLR2K, CDC73, POLR2D, POLR2C, POLR2B, GTF2E2, ELOF1, GTF2A2, TAF9, ERCC3, ELP3, ELP2, PCID2, CDK7, GTF2H5, GTF2H2, ELL2, TAF10, ADRM1, TAF12, GTF2F1, SUPT16H, NELFB, THOC7, PAF1, NELFE	2630	86	16792	2.22725	0.130799	0.00237313	0.050477
GO:0050790~regulation of catalytic activity	23	0.801953	0.000288549	GRPEL2, GRPEL1, BRCC3, SEPT2, PPP2R5D, ATP6V1H, RCAN1, ANKLE2, RCAN3, RCAN2, ARL2BP, SOD2, SH3BP4, BAG1, PPP1R7, BAG3, DPM2, MAT2B, PPP2R5E, CTSB, PPP2R2B, AUP1, PPP2R2A	2630	66	16792	2.225	0.784485	0.0197342	0.551245
GO:0006904~vesicle docking involved in exocytosis	9	0.313808	0.0401165	RAB8A, VPS18, SCFD1, VTI1B, RABEPK, STXBP3, VAMP3, VPS33A, YKT6	2630	26	16792	2.21012	1	0.674488	54.3531
GO:0050434~positive regulation of viral transcription	10	0.348675	0.0286974	PFN1, POLR2F, POLR2E, POLR2K, GTF2F1, NELFB, NELFE, POLR2D, POLR2C, POLR2B	2630	29	16792	2.20165	1	0.57493	42.7484
GO:0030203~glycosaminoglycan metabolic process	10	0.348675	0.0286974	GPC4, GNS, SDC1, B3GAT3, B3GALT6, HSPG2, SDC4, B4GALT7, GPC1, SDC2	2630	29	16792	2.20165	1	0.57493	42.7484
GO:0051973~positive regulation of telomerase activity	10	0.348675	0.0286974	NVL, MAPK1, TCP1, CCT4, ACD, DKC1, MAPKAPK5, CCT2, PKIB, MYC	2630	29	16792	2.20165	1	0.57493	42.7484
GO:0000422~mitophagy	12	0.41841	0.0148646	FUNDC2, FIS1, ATG9A, CDKN2A, ATG12, ATG5, SQSTM1, ATG4B, FUNDC1, PINK1, WIPI2, ATG3	2630	35	16792	2.18907	1	0.395934	24.9379
GO:0016236~macroautophagy	26	0.906555	0.000145608	ATG12, PRKAG1, ATG101, ATG13, PINK1, RRAGA, UBQLN1, TOMM70, ATG5, SQSTM1, TOMM5, ATG7, MTERF3, LAMTOR1, PRKAB1, TOMM40, OPTN, WIPI2, ATG3, VDAC1, MFN2, EI24, MTMR14, ATG4B, TOMM20, TOMM22	2630	76	16792	2.18427	0.539019	0.0111604	0.278531
GO:0030163~protein catabolic process	14	0.488145	0.00779276	TRAF2, PPT1, TRIM24, LONP1, PSMC6, PSMC5, PSMC4, TPP1, PSMC3, BACE2, PSMC2, PSMC1, CTSD, UCHL3	2630	41	16792	2.18017	1	0.26355	13.9161
GO:0010501~RNA secondary structure unwinding	15	0.523013	0.00566182	DDX1, DDX27, EIF4A3, DDX47, DDX56, DDX49, DDX19A, DDX24, DDX50, DDX21, DDX10, DDX20, DDX41, DDX52, DDX51	2630	44	16792	2.17663	1	0.211606	10.305
GO:0019083~viral transcription	38	1.32497	3.76518e-06	RPL17, RPL36A, RPL14, NUP93, NUP188, RPS3, RAE1, SEH1L, RPL6, RPL9, NUP50, RPL8, RPL26L1, RPL5, NUP37, RPL11, RPL4, RPL7A, RPS20, NUP35, RPS23, RPS24, RPSA, NUP153, RPL24, NUPL2, RPS4X, RPS6, RPS5, RPS7, RPS16, RPL18A, NUP62, RPL22, RPL13A, NUP205, RPS13, NUP107	2630	112	16792	2.16627	0.0198241	0.000392536	0.00721162
GO:0006914~autophagy	45	1.56904	4.53863e-07	ARSB, CHMP2A, TSG101, TOLLIP, CHMP4A, ATG101, ATG13, RNF185, PHF23, RAB1B, UBQLN2, RAB1A, MVB12A, ANXA7, SRPX, ATG5, XBP1, SH3GLB1, TMEM59, SQSTM1, ATG7, SNF8, SUPT20H, RAB24, VPS4A, USP10, DAP, VPS39, TIGAR, TM9SF1, EVA1A, VPS18, ATG9A, NRBF2, VTA1, IFI16, OPTN, PARK7, TMEM208, MAP1S, ATG4B, CTSD, HGS, VPS28, VPS25	2630	133	16792	2.16027	0.00241073	6.70434e-05	0.00086933
GO:0007005~mitochondrion organization	26	0.906555	0.000183925	HAX1, PINK1, HCFC1, STOML2, PRDX3, CXADR, GABPB1, LONP1, ALAS1, FXN, SHARPIN, TFB2M, HMGCL, GBA, ESRRA, MSTO1, EPAS1, CEP89, PHB, CYCS, BCS1L, PARK7, MAN2A1, PHB2, YME1L1, RAB38	2630	77	16792	2.1559	0.624014	0.0133107	0.351704
GO:0006024~glycosaminoglycan biosynthetic process	14	0.488145	0.00970241	GPC4, SDC1, EXTL3, B3GAT3, B3GALT6, UGDH, HSPG2, SDC4, EXT1, B4GALT7, GPC1, EXT2, SDC2, HS2ST1	2630	42	16792	2.12826	1	0.300635	17.0348
GO:0007017~microtubule-based process	12	0.41841	0.0184515	TUBB, TUBB2A, KIFAP3, VBP1, TUBA4A, TUBB6, DCTN3, TUBB3, TUBA1C, DCTN2, EML4, TUBB4B	2630	36	16792	2.12826	1	0.453331	30.0033
GO:0009966~regulation of signal transduction	10	0.348675	0.0354713	YWHAG, PPP1R2, NUP62, CDC42SE2, MTCH1, SPRED2, MGLL, CDH2, NCLN, GLRX2	2630	30	16792	2.12826	1	0.639987	49.9308
GO:0002224~toll-like receptor signaling pathway	9	0.313808	0.049445	IRAK2, CTSL, IRAK1, BCL10, HSP90B1, RPS6KA3, LGMN, UNC93B1, CTSB	2630	27	16792	2.12826	1	0.733377	62.1406
GO:0006406~mRNA export from nucleus	33	1.15063	3.41959e-05	ENY2, NXT1, NCBP2, AGFG1, NUP93, EIF5A, NUP188, SEH1L, RBM8A, DDX19A, RAE1, NUP50, U2AF1, NUP37, NUP35, NUP153, CHTOP, ALYREF, RNPS1, NUPL2, SARNP, EIF4A3, SRSF4, EIF4E, NUP62, SRSF9, NUP205, RBMX2, THOC7, NUP107, THOC5, CPSF3, ALKBH5	2630	100	16792	2.10698	0.166279	0.00297682	0.0654788
GO:0000398~mRNA splicing, via spliceosome	73	2.54533	3.15705e-10	RALY, NCBP2, SNRPD3, SNRPD1, SYNCRIP, SNRPD2, BUD31, YBX1, CTNNBL1, NONO, PLRG1, RBM8A, RAVER1, U2AF1, LSM5, LSM4, LSM3, ZRSR2, SNRPA1, EFTUD2, PTBP1, PRPF4, HNRNPR, HNRNPU, EIF4A3, AQR, RBMX2, SNRPB, SNRNP40, SNRPC, CPSF3, SNRPF, POLR2F, POLR2E, POLR2K, PPIL1, SNRPB2, SNU13, SF3B5, POLR2D, POLR2C, SF3B4, POLR2B, SF3B3, HNRNPK, CD2BP2, HNRNPF, NUDT21, USP39, ISY1, PPIL3, HNRNPC, DDX41, GEMIN7, GE…	2630	222	16792	2.0995	1.67892e-06	6.45739e-08	6.04705e-07
GO:0006369~termination of RNA polymerase II transcription	21	0.732218	0.00134032	NCBP2, CHTOP, SNRPD3, ALYREF, RNPS1, SARNP, EIF4A3, PAPOLA, SRSF4, RBM8A, SRSF9, NUDT21, U2AF1, SNRPB, THOC7, LSM10, THOC5, SNRPF, CPSF3, CSTF1, SSU72	2630	64	16792	2.09501	0.999201	0.0675385	2.53627
GO:0031398~positive regulation of protein ubiquitination	21	0.732218	0.00134032	BCL10, CAV1, DERL1, UBE3A, AIMP2, SPHK1, NDFIP2, PHF23, PINK1, FKBP1A, UBE2L3, UBQLN1, STUB1, HSPBP1, PSMD10, RIPK2, TBC1D7, COMMD1, HSPA5, RCHY1, UBE2D1	2630	64	16792	2.09501	0.999201	0.0675385	2.53627
GO:0000413~protein peptidyl-prolyl isomerization	14	0.488145	0.0119584	FKBP9, PPIH, PPIL1, FKBP4, PTPA, PPIC, FKBP3, TTC9C, PPIL4, PPIL3, FKBP1A, PIN4, FKBP10, PIN1	2630	43	16792	2.07877	1	0.347223	20.581
GO:1901215~negative regulation of neuron death	13	0.453278	0.0164386	TRAF2, HSF1, CD34, CHMP4A, IKBKG, PSMC1, BTBD10, CDK5, PARK7, STAT3, GBA, PPP5C, TIGAR	2630	40	16792	2.07506	1	0.423579	27.2021
GO:0007080~mitotic metaphase plate congression	12	0.41841	0.022642	CHMP2A, CUL3, CHMP1A, SEH1L, CHMP5, CHMP4A, CHMP7, VPS4A, RAB11A, CDC23, PDCD6IP, KPNB1	2630	37	16792	2.07074	1	0.509459	35.5107
GO:0006296~nucleotide-excision repair, DNA incision, 5'-to lesion	12	0.41841	0.022642	POLD3, POLD4, RPA2, POLK, CUL4A, RFC2, POLD2, GTF2H5, ERCC3, GTF2H2, ERCC1, RBX1	2630	37	16792	2.07074	1	0.509459	35.5107
GO:0019058~viral life cycle	10	0.348675	0.0432646	CHMP2A, TSG101, CHMP5, CHMP4A, VTA1, CHMP7, VPS4A, NEDD4L, PDCD6IP, VPS28	2630	31	16792	2.05961	1	0.693318	57.1368
GO:0016032~viral process	96	3.34728	1.84415e-12	DYNC1LI1, TLN1, COPS6, IL6ST, SYNCRIP, TSPAN7, NUP188, RNF216, DAXX, RAE1, SEH1L, SND1, PRMT6, GTF2A2, RALA, SHC1, RANBP1, NUP37, ZYX, NUP35, CUL1, NFX1, ABCE1, LYN, RAN, SLC25A5, ATP6V1H, HLA-C, UBE2I, NUPL2, SRPK1, RAD50, MAPK1, PDCL3, C1QBP, PSMA4, NUP205, PSMA3, IPO5, MDM2, NUP107, SEPT6, DYNC1I2, PSMB10, AP1M1, POLR2E, UBE3A, RAD23A, NUP93, ABI1, PSMA7, KARS, RBX1, PSMB5, RACK1, TNFRSF1A, WA…	2630	299	16792	2.04997	9.80741e-09	4.90371e-10	3.53239e-09
GO:0031124~mRNA 3'-end processing	16	0.55788	0.0077978	NCBP2, CHTOP, ALYREF, RNPS1, SARNP, EIF4A3, PAPOLA, SRSF4, RBM8A, SRSF9, NUDT21, U2AF1, THOC7, THOC5, CPSF3, CSTF1	2630	50	16792	2.04313	1	0.262049	13.9245
GO:0000184~nuclear-transcribed mRNA catabolic process, nonsense-mediated decay	38	1.32497	1.79096e-05	NCBP2, RPL17, RPL36A, RPL14, UHMK1, RPS3, RBM8A, RPL6, PPP2CA, EIF3E, RPL9, RPL8, RPL26L1, RPL5, RPL11, RPL4, RPL7A, RPS20, RPS23, RPS24, PPP2R1A, RPSA, RPL24, RNPS1, RPS4X, RPS6, ETF1, RPS5, RPS7, EIF4A3, RPS16, RPL18A, GSPT1, RPL22, RPL13A, PNRC2, RPS13, PPP2R2A	2630	119	16792	2.03884	0.0908491	0.00169934	0.0342987
GO:0061025~membrane fusion	14	0.488145	0.0145989	STX1A, VAPA, RABIF, NSFL1C, VTI1B, BLOC1S6, ANXA7, STX12, UBXN2B, ATG7, GOSR2, VAMP3, STX10, DNM2	2630	44	16792	2.03152	1	0.392344	24.5492
GO:0033683~nucleotide-excision repair, DNA incision	12	0.41841	0.0274872	POLD3, POLD4, RPA2, POLK, CUL4A, RFC2, POLD2, GTF2H5, ERCC3, GTF2H2, ERCC1, RBX1	2630	38	16792	2.01625	1	0.565133	41.3665
GO:0038095~Fc-epsilon receptor signaling pathway	56	1.95258	2.33993e-07	HRAS, IGKV1-17, MAP3K7, PSMD1, PSMD2, PSMD3, PSMD4, SHC1, PSMD5, PSMD6, PSMD7, PSMD8, CUL1, BCL10, LYN, PSMA2, UBE2N, PSMA1, MAPK1, PSMA6, PSME1, PSMA5, PSME2, PSMA4, PSMA3, MAPK9, PSME3, PSMB10, UBE2V1, PSMA7, PSMB5, PSMF1, PSMB7, UBE2D2, PSMB6, PSMB1, PSMB3, PSMB2, UBE2D1, FBXW11, PSMB8, PSMB9, NRAS, PSMC6, PSMD14, PSMC5, PSMD13, PSMC4, PSMD12, PSMC3, PSMD11, PSMC2, PSMD10, IKBKG, PSMC1, CALM3	2630	178	16792	2.0087	0.0012436	3.5553e-05	0.000448192
GO:0006928~movement of cell or subcellular component	27	0.941423	0.000489616	TLN1, CAPZA2, CAPZA1, ABI1, ARF6, ARPC5, CAPZB, TPM4, TPM3, VCL, ACTR3, ACTR2, TUBB, ARPC3, ARPC2, MSN, TUBB4B, ACTB, MAP2K1, ADGRE5, ARFIP2, STAT3, PLAUR, ARPC1B, CORO1A, MAPK14, TXN	2630	86	16792	2.00453	0.926054	0.0308913	0.933659
GO:0075733~intracellular transport of virus	16	0.55788	0.00948301	NUP153, TSG101, RAN, NUP93, NUP188, NUPL2, NUP62, SEH1L, RAE1, NUP205, NUP50, NUP37, NUP107, NUP35, VPS28, KPNB1	2630	51	16792	2.00307	1	0.298367	16.682
GO:0008380~RNA splicing	52	1.81311	7.68324e-07	NCBP2, SNRPD3, RBM4, SNRPD1, SNRPD2, RP9, SYNCRIP, WTAP, NONO, RBM8A, TARDBP, U2AF1, LSM4, ZPR1, ZRSR2, LSM1, SREK1IP1, PPP2R1A, SNRPA1, SRPK2, NOL3, EFTUD2, PTBP1, PRPF4, SRPK1, EIF4A3, C1QBP, SNRPB, THOC7, SNRNP40, THOC5, SNRPF, SF3B4, SF3B3, DDX47, PPP2CA, USP39, MTERF3, SCNM1, HNRNPC, ARL6IP4, BCAS2, USB1, GEMIN2, LGALS3, SAP18, RNPS1, SF3A3, SRSF4, THRAP3, SRSF8, LSM10	2630	166	16792	2.00005	0.00407761	0.000104762	0.00147164
GO:0000910~cytokinesis	15	0.523013	0.0129357	ROCK2, JTB, BCL2L1, DCTN3, MYH9, KLHL9, IST1, KLHL13, RALB, RAB11A, RALA, RHOC, BIN3, SEPT6, NEK6	2630	48	16792	1.99525	1	0.36589	22.0723
GO:0006396~RNA processing	30	1.04603	0.000294504	SNRPD3, PNPT1, PABPC4, RBM4, SNRPD1, SYNCRIP, DUSP11, HNRNPK, DKC1, HNRNPF, LSM4, DDX20, RTCA, RBMS1, DHX9, GRSF1, SSB, PRPF4, HNRNPU, MRM3, TRNT1, RCL1, LARP6, TMTC1, SNRNP40, DHX40, CSTF1, TRUB2, XRN2, MRPL44	2630	97	16792	1.97468	0.791205	0.0198818	0.56259
GO:0006405~RNA export from nucleus	17	0.592748	0.00841728	NCBP2, NXT1, CHTOP, ALYREF, NUP188, RNPS1, SARNP, EIF4A3, SRSF4, EIF4E, NUP62, RBM8A, SRSF9, U2AF1, THOC7, RANBP1, THOC5	2630	55	16792	1.97348	1	0.27801	14.948
GO:0050821~protein stabilization	42	1.46444	1.49167e-05	ATP1B3, PML, HCFC1, PINK1, CCT2, CCT3, CALR, PTEN, CDC37, ZNF207, PIN1, P3H1, PFN1, SUMO1, GOLGA7, CDKN2A, STX12, IFT46, PEX19, BAG3, TAF9, TNIP2, CDC37L1, GTPBP4, TCP1, PDCD10, FLOT2, PHB, CRTAP, MUL1, DNLZ, CCT6A, UBE2B, PARK7, CCT7, LAMP2, CCT5, CCT4, PHB2, CCT8, HSPD1, SEL1L	2630	136	16792	1.97177	0.0762627	0.00146795	0.0285677
GO:0006605~protein targeting	12	0.41841	0.0330353	YWHAZ, YWHAG, LTBP2, HOMER3, PML, TOMM20, YWHAB, YWHAQ, RPL11, GIPC1, CDC37, OS9	2630	39	16792	1.96455	1	0.62327	47.4524
GO:0042769~DNA damage response, detection of DNA damage	11	0.383543	0.0452616	POLD3, POLD4, MRPS35, RPA2, CUL4A, RFC2, MRPS11, POLD2, UBE2B, RPS3, RBX1	2630	36	16792	1.95091	1	0.708173	58.8184
GO:0042059~negative regulation of epidermal growth factor receptor signaling pathway	11	0.383543	0.0452616	EPS15, CDC42, RNF126, CLTA, AP2B1, RNF115, NUP62, TSG101, AP2S1, HGS, AP2M1	2630	36	16792	1.95091	1	0.708173	58.8184
GO:0006886~intracellular protein transport	72	2.51046	1.50754e-08	COPA, RAB3GAP2, CLTA, CLTB, VIPAS39, AP2S1, TIMM17A, TIMM17B, AP3S2, AP3S1, CLTC, EIF2D, COPB2, AP1S1, CTTN, AP2B1, KPNB1, SAR1A, SEC24D, KDELR1, TBC1D9B, SEC23A, STX6, KDELR2, STX1A, RAN, WLS, CDK5, BCAP31, COPG1, SEC61B, IPO5, ARCN1, SIL1, TOMM22, TGFBRAP1, VPS26A, SEC23B, VPS29, AP1M1, ARFGAP3, SNX6, SNX17, COPZ1, UNC93B1, CTSA, STX12, ACD, TMED2, KLC1, AP3M1, NPM1, CHM, BCAP29, AP3D1, TMED10,…	2630	236	16792	1.9479	8.01679e-05	2.58616e-06	2.88756e-05
GO:0019886~antigen processing and presentation of exogenous peptide antigen via MHC class II	28	0.97629	0.000646286	AP1M1, CLTA, SEC31A, LGMN, AP2S1, DYNC2LI1, CLTC, CANX, AP2B1, AP1S1, KLC1, ACTR1A, KIFAP3, SEC24D, AP2M1, SEC23A, DCTN5, DCTN6, DCTN3, DCTN4, DCTN1, DCTN2, CTSL, ARF1, SEC13, CTSD, DYNC1I2, DNM2	2630	92	16792	1.9432	0.967873	0.0387473	1.23067
GO:0031647~regulation of protein stability	21	0.732218	0.00433324	TADA3, NF2, MUL1, APTX, CTSA, GIPC1, TRIM24, SUGT1, PTEN, STUB1, CDC42, MAPK1, SUMO1, LAMP2, HDAC3, CDKN2A, SH3GLB1, XBP1, DPM2, VPS35, PSMD8	2630	70	16792	1.91544	1	0.175066	7.98141
GO:0006511~ubiquitin-dependent protein catabolic process	54	1.88285	2.89119e-06	TOLLIP, COPS3, UBE2G1, UCHL1, UBE2G2, PINK1, CUL3, PSMD3, FBXL12, USP11, RANBP1, PSMD4, USP10, USP16, USP15, FBXO22, CUL1, USP14, UBE2A, UBE2I, UBE2H, UBE2B, PSMA2, UBE2N, PSMA1, ADRM1, PSMA6, UBE2K, PSMA4, PSMA3, UCHL3, USP8, UBE3A, USP5, USP9X, PSMA7, STUB1, PSMF1, UBE2D3, UBE2D2, SQSTM1, XBP1, UBE2D1, NUB1, CDC23, UBE2L3, PSMC6, PSMD14, PSMD13, CUL4A, PSMD11, PSMC2, TRPC4AP, FBXO32	2630	182	16792	1.89439	0.0152578	0.000313734	0.00553768
GO:0007077~mitotic nuclear envelope disassembly	13	0.453278	0.0342048	NUP153, NUP93, NUP188, NUPL2, NUP62, RAE1, SEH1L, NUP205, NUP50, NUP37, NUP107, NUP35, NEK6	2630	44	16792	1.88642	1	0.634283	48.6564
GO:0000045~autophagosome assembly	12	0.41841	0.0464127	ATG9A, STX12, ATG12, ATG5, ATG4B, ATG101, EMC6, ATG13, UBQLN1, WIPI2, ATG3, RAB1A	2630	41	16792	1.86872	1	0.712058	59.759
GO:0006302~double-strand break repair	19	0.662483	0.0109987	XRCC5, XRCC4, BRCC3, MSH2, DTX3L, DDX1, APTX, PRKDC, EXD2, KAT5, RAD50, EYA3, TDP2, ACTR5, SMARCA5, BABAM1, MAD2L2, ERCC1, CIB1	2630	66	16792	1.83805	1	0.329748	19.0903
GO:0006464~cellular protein modification process	30	1.04603	0.00121787	TSG101, PRKDC, SAE1, SLC35A1, UBE2D3, UBE2D2, PLOD1, PIGH, ATG7, RPN1, FBXW2, LOX, RPN2, LOXL2, YES1, FBXO22, B4GALT7, LCMT1, MCRS1, UBE2L6, ICMT, UBE2I, UBE2L3, ATG3, ADPRH, UBE2N, ST8SIA4, UBE2M, UBL4A, SERP1	2630	105	16792	1.82423	0.998467	0.0627504	2.30711
GO:0042795~snRNA transcription from RNA polymerase II promoter	20	0.69735	0.00964848	NCBP2, POLR2F, POLR2E, POLR2K, CDK7, POLR2D, POLR2C, POLR2B, ELL2, ZC3H8, PHAX, INTS8, GTF2E2, NABP2, INTS5, INTS4, GTF2F1, INTS7, GTF2A2, TAF9	2630	70	16792	1.82423	1	0.300964	16.9482
GO:0016925~protein sumoylation	33	1.15063	0.000841051	XRCC4, PML, NUP93, CETN2, SAE1, NUP188, SUMO3, SUMO1, CDKN2A, HNRNPK, RAE1, SEH1L, NSMCE1, NUP50, NUP37, HNRNPC, NUP35, PHC2, NUP153, MUL1, SMC6, UBE2I, NUPL2, SMC3, PIAS4, NUP62, PIAS3, UBA2, RNF2, NUP205, NOP58, MDM2, NUP107	2630	117	16792	1.80084	0.988605	0.0464868	1.59872
GO:0001933~negative regulation of protein phosphorylation	17	0.592748	0.022959	LYN, IMPACT, PRKDC, FKBP1A, WWTR1, MYADM, PTEN, PARK7, SLIT2, CORO1C, TARDBP, PRNP, PPP1R15B, FAM129A, IGFBP3, CIB1, PPP5C	2630	61	16792	1.77937	1	0.510311	35.9102
GO:0006919~activation of cysteine-type endopeptidase activity involved in apoptotic process	23	0.801953	0.00758983	TRAF2, CARD8, ANP32B, PML, MUL1, FADD, BCL2L13, PDCD2, TRADD, RACK1, CASP3, CDKN2A, ROBO1, IFT57, MTCH1, DIABLO, FAM162A, FAS, DAP, HSPD1, CASP1, PDCD6, CASP2	2630	83	16792	1.76928	1	0.26093	13.5783
GO:0015031~protein transport	109	3.80056	1.44235e-09	SEC31A, CHMP5, UNC50, CHMP7, RAB1B, VPS33A, MVB12A, DAB2, ATG7, TIMM9, AAGAB, VPS4A, RAB24, NUP37, JAGN1, RAB21, SCAMP3, ATG9A, SCAMP2, ACTN4, GOLT1B, RINT1, MYH9, YIF1A, TIMM8B, RAB18, RAB14, PDCD6IP, MVP, CHMP2A, ARFGAP2, SDAD1, COPZ1, ARF6, SNX4, PPT1, LMAN2, LMAN1, ARFGEF2, BTF3, TRAM1, SEC61A1, TIMM10B, RABIF, LIN7C, CD63, EPS15, TMEM115, ARF1, AKTIP, CNIH4, ARF4, RAP1A, YIPF5, ENY2, TSG101,…	2630	395	16792	1.76188	7.67039e-06	2.73943e-07	2.76269e-06
GO:0007030~Golgi organization	20	0.69735	0.0175604	CSNK1A1, RAB2A, ARL1, ATL3, NSFL1C, OPTN, LMAN2, LMAN1, TMED9, RAB1A, CDC42, COG4, BLZF1, TMED2, UBXN2B, GOLPH3, SURF4, TMED10, CLASP1, GOLGA5	2630	74	16792	1.72562	1	0.438988	28.7762
GO:0051291~protein heterooligomerization	18	0.627615	0.026611	CHMP2A, TMEM120A, BCL10, TRAF2, LIMS1, HRAS, MAT2A, PCBD1, YWHAB, PRKAB1, STXBP3, FADD, PRKCSH, TRADD, SQSTM1, ILK, CAB39, PPP5C	2630	67	16792	1.71532	1	0.557346	40.3463
GO:1900034~regulation of cellular response to heat	20	0.69735	0.0201645	NUP153, FKBP4, NUP93, NUP188, NUPL2, RPA2, MAPK1, BAG1, HSF1, NUP62, SEH1L, RAE1, BAG3, NUP205, NUP50, CAMK2D, NUP37, HIKESHI, NUP107, NUP35	2630	75	16792	1.70261	1	0.477269	32.3065
GO:0030512~negative regulation of transforming growth factor beta receptor signaling pathway	17	0.592748	0.035085	CAV1, SNX6, STRAP, TGFBR2, SMAD2, STUB1, PIN1, PEG10, HTRA1, XBP1, ADAM17, HSPA5, SMURF1, TGFB1I1, PMEPA1, DNM2, FAM89B	2630	64	16792	1.69596	1	0.63982	49.5453
GO:0030307~positive regulation of cell growth	22	0.767085	0.0175107	DERL2, EXTL3, ADAM10, EXOSC4, NOL8, SPHK1, EXOSC2, LEF1, CDC42, EIF4G2, RPS6KA3, CSNK2A1, FXN, RPS6KA1, PSMD10, ADAM17, SDCBP, HBEGF, TAF9, ACSL4, CIB1, MAP2K5	2630	84	16792	1.67221	1	0.440056	28.7071
GO:0016197~endosomal transport	17	0.592748	0.0454101	CHMP2A, CHMP5, SNX27, TSG101, VTA1, CHMP4A, SNX17, AP5S1, CHMP7, SQSTM1, SNF8, VPS4A, HGS, AP5M1, RAB10, VPS28, VPS25	2630	66	16792	1.64457	1	0.707585	58.9409
GO:0007265~Ras protein signal transduction	18	0.627615	0.0394043	HRAS, MAPKAPK5, G3BP1, G3BP2, PARK7, DOK1, NRAS, CRKL, CDKN2A, PLK2, GNB1, MAPK14, RALB, DNMT1, RALA, RRAS, SDCBP, SHC1	2630	70	16792	1.6418	1	0.671594	53.7
GO:0007584~response to nutrient	19	0.662483	0.034234	ARSB, LDHA, AHCY, TGFBR2, HAT1, ENSA, STAT1, PTEN, GCLM, PKM, NOD2, HSF1, CNR1, GNPAT, ADSL, ACSL4, IGFBP2, ERCC1, HMGCL	2630	74	16792	1.63934	1	0.632609	48.6861
GO:0043123~positive regulation of I-kappaB kinase/NF-kappaB signaling	41	1.42957	0.00160861	MTDH, VAPA, SLC20A1, TBK1, TFG, PINK1, UBE2V1, FKBP1A, TERF2IP, LPAR1, MAP3K7, TNFRSF1A, TMED4, NOD2, TMEM9B, MIER1, SHARPIN, HMOX1, TGM2, RHOC, CASP1, TNIP2, IRAK1, BCL10, GOLT1B, MUL1, NDFIP2, FADD, UBE2I, WLS, TRADD, UBE2N, NUP62, PLK2, ATP2C1, IKBKG, RIPK2, IRF3, EEF1D, NEK6, PPP5C	2630	161	16792	1.62594	0.999809	0.0797601	3.03656
GO:0006397~mRNA processing	45	1.56904	0.00122484	AURKAIP1, RBM4, WTAP, SF3B4, SF3B3, NONO, DDX47, RBM8A, TARDBP, NUDT21, USP39, U2AF1, LSM5, SCNM1, LSM3, ZPR1, LSM1, ARL6IP4, SREK1IP1, TSEN15, TSEN34, BCAS2, USB1, ZC3H14, KHDRBS3, PDCD11, GEMIN2, LGALS3, EFTUD2, PTBP1, SAP18, HNRNPR, HNRNPA0, SRPK1, SF3A3, SRSF4, C1QBP, SRSF9, THRAP3, SRSF8, CPSF6, THOC7, LSM10, XRN2, ALKBH5	2630	179	16792	1.60512	0.998523	0.0624935	2.32017
GO:1901796~regulation of signal transduction by p53 class mediator	31	1.08089	0.00856003	MEAF6, MAPKAPK5, PRKAG1, HUS1, PML, PHF20, PIN1, RPA2, CSNK2A1, PRMT5, TAF9, RBBP4, CSNK2B, PRKAB1, TRIM24, SMYD2, KAT5, RBBP7, CDK5, RAD50, NOC2L, RBBP8, TP53RK, RAD1, TAF10, TAF12, HDAC2, RFC2, MAPK14, SUPT16H, MDM2	2630	124	16792	1.5962	1	0.278598	15.1823
GO:0001649~osteoblast differentiation	26	0.906555	0.0166788	SYNCRIP, FHL2, CLTC, CBFB, TPM4, IARS, SND1, BCAP29, DDX21, HNRNPC, RUNX2, SPP1, DHX9, BMP2, GTPBP4, RRBP1, PHB, ALYREF, LEF1, CCDC47, WWTR1, HNRNPU, RSL1D1, PSMC2, IGFBP3, RDH14	2630	104	16792	1.5962	1	0.426251	27.5418
GO:0046718~viral entry into host cell	20	0.69735	0.0378581	PVR, RPSA, NUP153, HYAL2, VPS18, GYPA, EFNB2, AXL, NECTIN2, DYNLT1, CXADR, SLC52A2, ITGB1, EPS15, SLC1A5, LAMP3, ITGA5, CD46, SCARB2, CTSB	2630	80	16792	1.5962	1	0.66241	52.2514
GO:0007067~mitotic nuclear division	61	2.12692	0.000283814	DYNC1LI1, CLTA, SEPT2, CLTC, ANKLE2, RPS3, KLHL9, NUP37, ACTR8, USP16, TUBB3, BRCC3, ANAPC5, RAN, DYNLT3, UBE2I, DYNLT1, DCTN3, DCTN1, WEE1, RBBP8, DCTN2, EML4, MCMBP, KLHL13, CLIP1, MAPRE1, RUVBL1, MAD2L2, NEK6, PPP5C, ANAPC16, MPLKIP, TADA3, ANAPC13, USP9X, HAUS2, ANAPC15, TIPIN, CETN2, ENSA, ANAPC11, FBXW5, KLHL42, NSUN2, NUDC, CSNK1A1, SSSCA1, BOD1, CKAP5, JTB, CDC23, RPS6, SUGT1, REEP3, SMC3…	2630	248	16792	1.57045	0.778988	0.0196664	0.542223
GO:1903955~positive regulation of protein targeting to mitochondrion	21	0.732218	0.0413313	CYB5R1, FAM20B, ATG13, PINK1, SAE1, POLR3A, UBE2J2, UBE2L3, GLS2, UBE2D3, PSMB7, STARD7, HUWE1, SH3GLB1, U2AF1, ACTL6A, RUVBL1, LEPROT, PSMD8, WDR46, PLAGL2	2630	86	16792	1.55908	1	0.681859	55.4469
GO:0042787~protein ubiquitination involved in ubiquitin-dependent protein catabolic process	37	1.2901	0.00685123	ANAPC16, UBE2Z, MAEA, ANAPC15, RNF185, KEAP1, ANAPC11, RNF181, STUB1, OS9, RBX1, KLHL7, CUL3, RNF126, RMND5A, C18ORF25, BTBD1, RNF11, RCHY1, NEDD4L, UBE2D1, RNF14, CUL1, BUB3, TRIP12, ANAPC5, HERC4, CDC23, UBE2L3, BFAR, RNF7, RNF115, CUL4A, HUWE1, RNF24, MDM2, SMURF1	2630	153	16792	1.54403	1	0.246791	12.3379
GO:0001701~in utero embryonic development	45	1.56904	0.00303607	FGFR1, COPS3, YBX3, KEAP1, BCL2L1, OCRL, PRKCSH, ITGB1, YBX1, PRMT1, RRN3, PLOD3, HINFP, BTF3, BRK1, FOSL1, SEC24D, MYC, SLC39A3, SCO2, RTCB, SLC39A1, MAFG, BMP2, UBE2A, CCM2, ADAM10, MSH2, TGFBR2, PTPRR, SMAD2, MYH9, UBE2B, RIC8A, MGAT1, MAN2A1, NMT1, GPI, DUSP3, RDH10, CUL4A, EIF2S2, PYGO2, EIF4E2, RCN1	2630	187	16792	1.53645	1	0.132245	5.65781
GO:0000165~MAPK cascade	62	2.16179	0.000736583	HRAS, CUL3, PSMD1, PSMD2, PSMD3, PSMD4, SHC1, PSMD5, PSMD6, MYC, PSMD7, PSMD8, PSMA2, PSMA1, MAPK1, PSMA6, PSME1, PSMA5, PSME2, PSMA4, PSMA3, PSME3, PPP5C, PSMB10, FGFR1, CAV1, MAPKAPK5, PSMA7, MAP3K7CL, RBX1, PSMB5, PSMF1, PSMB7, PTK2, PSMB6, PSMB1, PSMB3, PSMB2, CAMK2D, SCG2, MAP2K1, MAP2K2, MAP2K3, YWHAB, PSMB8, PSMB9, NRAS, PSMC6, PSMD14, PSMC5, PSMD13, PSMC4, PSMD12, PSMC3, MAPK13, PSMD11, P…	2630	262	16792	1.5109	0.980131	0.0426057	1.40147
GO:0000082~G1/S transition of mitotic cell cycle	24	0.83682	0.0418407	BCAT1, PPP6C, CDK6, POLA2, CDK7, RPS6, CDK4, ITGB1, RBBP8, CUL3, RPA2, EIF4EBP1, EIF4E, CDKN2A, GSPT1, CUL4A, PLK2, ORC4, HINFP, CAMK2D, ORC5, RANBP1, CUL1, ORC3	2630	102	16792	1.5023	1	0.684563	55.8982
GO:0006486~protein glycosylation	26	0.906555	0.0429872	GALNT2, ST6GAL1, B4GALT3, GALNT1, DHDDS, B3GALT6, ALG1, ALG5, ALG9, MGAT1, TMEM115, POMGNT1, B3GAT3, STT3A, B3GNT5, ST3GAL5, ST8SIA4, B3GALNT1, RPN1, SRD5A3, GALNT18, EXT1, GALNT11, DDOST, EXT2, SERP1	2630	113	16792	1.46907	1	0.69276	56.8981
GO:0005975~carbohydrate metabolic process	40	1.3947	0.0115587	LDHA, TALDO1, GNPDA1, ADPGK, HEXB, UGDH, SLC35A1, CNOT7, GLB1, SLC2A8, SIAE, IDH3G, ST3GAL5, AKR7A2, GLO1, B4GALT7, GBA, B4GALT1, HYAL2, B4GALT3, CS, CHI3L1, CHST2, CHST3, FUCA2, MGAT1, GPI, PGM3, RPE, PGLS, B3GAT3, CHID1, PYGL, ALDH1B1, MLEC, GFPT2, AKR1B1, GK, MDH2, MDH1	2630	174	16792	1.46777	1	0.341473	19.9633
GO:0001666~response to hypoxia	39	1.35983	0.0157367	PAM, CAV1, LDHA, AHCY, PML, EGLN1, POSTN, CBFA2T3, PKM, SLC2A8, CASP3, LONP1, PLOD1, HMOX1, CAMK2D, NOS2, CD24, CASP1, THBS1, ERCC3, LOXL2, TM9SF4, BMP2, NOL3, EPAS1, ACTN4, FUNDC1, TGFBR2, CAPN2, AGTRAP, SOD2, HSP90B1, SCFD1, HIF1A, CA9, ADAM17, ADSL, HSPD1, ALKBH5	2630	172	16792	1.44771	1	0.411702	26.2005
GO:0051301~cell division	78	2.71967	0.00097875	DYNC1LI1, CLTA, SEPT2, MAEA, MAU2, TSG101, BCAR1, CLTC, ANKLE2, RPS3, ZNF207, CDC42, SEH1L, VPS4A, NUP37, CDK10, ACTR8, USP16, TUBA1C, CIB1, BRCC3, ANAPC5, RAN, DYNLT3, DYNLT1, UBE2I, CDK6, CDK7, CDK4, PPP1CB, CDK5, WEE1, RBBP8, CHMP1A, PPP1CA, CCND3, MCMBP, PELO, ARL8B, MAPRE1, RUVBL1, MAD2L2, ANAPC16, MPLKIP, ANAPC13, USP9X, HAUS2, ANAPC15, TIPIN, CETN2, ARF6, CDC73, ENSA, ANAPC11, CDC37, WAPL,…	2630	350	16792	1.4229	0.994525	0.0522703	1.85814
GO:0006915~apoptotic process	125	4.35844	4.44731e-05	TSPO, MRPL41, EIF5A, RNF216, CIAPIN1, MRPS30, CTNNBL1, MAP3K7, CLPTM1L, DAB2, GHITM, CSNK2A1, CDKN2A, ATG5, TIAM1, RALB, DAP, FAS, CUL1, API5, CIB1, BCL7B, BCL10, YARS, FADD, MECOM, BCL2L13, SLTM, RNF130, MAPK1, TRIM35, NME3, RFK, TNFAIP8, RIPK2, PDCD6IP, NEK6, TNFAIP1, ZFAND6, RRAGA, STK17A, PTRH2, ZC3H8, PRUNE2, PEG10, UBE2D3, CSE1L, MTCH1, DIABLO, TRAF7, DDX41, PPP2R2B, TIGAR, CARD8, TGFBR2, S…	2630	567	16792	1.40758	0.210624	0.00374714	0.0851498
GO:0007050~cell cycle arrest	31	1.08089	0.0460742	HRAS, CAB39L, TSG101, PRKAG1, PML, RRAGA, CALR, UHMK1, CUL3, CDKN2A, CDKN2B, ILK, CDC123, CAB39, THBS1, MYC, CUL1, MAP2K1, LAMTOR1, MSH2, PRKAB1, TBRG4, CDK6, CDK7, MFN2, EIF4G2, PPM1G, PA2G4, CUL4A, PRNP, GADD45A	2630	141	16792	1.40375	1	0.711141	59.4846
GO:0008283~cell proliferation	77	2.6848	0.00517823	TUSC2, XRCC5, COPS2, TSPO, HRAS, BCAR1, UCHL1, DTYMK, CBFA2T3, PTEN, ISG20, LARP1, GPC4, BAK1, DAB2, BLZF1, RRN3, DKC1, PRMT5, ILK, TGFBI, GNG2, ZPR1, MYC, CUL1, GNL3, PDXK, PDPN, BYSL, VTI1B, IFI16, CDK7, RBBP7, CDK5, MRM2, DCTN2, OGFOD1, PA2G4, PRDM4, GNB1, CD34, TXN, TXNRD1, YME1L1, PELO, MAPRE1, BCAT1, CDV3, USP8, HDGF, PRKDC, UBE2V2, BCL2L1, BOP1, PDAP1, ANXA7, CSE1L, WDR12, DDX41, NRDC, ERC…	2630	366	16792	1.34325	1	0.202526	9.46575
GO:0007049~cell cycle	45	1.56904	0.0399731	ANAPC16, TUSC2, SEPT2, MAEA, MRPL41, APEX2, DTYMK, TIPIN, HCFC1, ARF6, BCCIP, CDC73, WTAP, PIN1, RACK1, SMARCB1, CDC123, USP39, THAP1, USP16, PRPF40A, ARL2, PARD6B, TXNL4B, SPOUT1, RBBP4, LIN52, RINT1, PCNP, APPL2, CDK5, MAPK1, PFDN1, PPP1CA, RPS6KA3, CCND3, RPS6KA1, NOLC1, MAPK13, PTP4A1, CAMK1, PELO, LIN37, ARL8B, PDCD6IP	2630	217	16792	1.32403	1	0.67504	54.2222
GO:0055114~oxidation-reduction process	119	4.14923	0.00264194	HCCS, MRPS36, LDHA, GMPR2, PGD, HIBADH, AGPS, PLOD1, PLOD3, AKR7A2, LOX, HIGD1A, TXNL1, PCBD1, MOXD1, OGFOD1, SCCPDH, ASPHD1, KDSR, SRXN1, TMX1, HSD17B10, PAM, ME3, ME2, CYP51A1, FDX1, P3H2, P3H1, DHODH, PTGR1, BMP2, SCD, HGD, CRYZ, CYB561A3, TXNDC12, TXNDC17, DOHH, CRYZL1, CYB5R3, CYB5R1, PTGES2, CYB5R2, UQCRC1, PDIA3, PRDX4, NDUFS7, MTHFD1, TDO2, P4HA2, P4HA1, CREG2, SRD5A3, VKORC1, SRD5A1, LOX…	2630	592	16792	1.28343	0.999999	0.121086	4.94086
GO:0016567~protein ubiquitination	72	2.51046	0.0201766	PINK1, SAE1, LRR1, KLHL4, RNF182, OS9, MKRN2, KLHL7, CUL3, CDC42, DCAF13, DCAF10, ATG7, NSMCE1, KLHL9, RNF38, FBXL12, FANCF, CUL1, UBE2J1, UBE2B, MED10, HERC2P3, PJA2, UBE2N, RNF130, UBR7, MED8, UBE2M, KLHL13, RNF25, RNF138, MDM2, TNFAIP1, ASB6, ANAPC16, UBE3D, KEAP1, UBE2V2, ANAPC11, STUB1, FEM1A, RBX1, UBE2D3, UBE2D2, FBXW5, FBXW2, RCHY1, NEDD4L, TRAF7, FBXW11, RNF14, NUB1, LRRC41, MUL1, UBE2L6…	2630	359	16792	1.28052	1	0.475451	32.3225
GO:0043066~negative regulation of apoptotic process	88	3.06834	0.0247977	IL6ST, YBX3, PRDX3, ANKLE2, CIAPIN1, PTEN, TRIAP1, CASP3, ATAD3A, DAB2, FXN, BAG1, BAG3, KIFAP3, FAS, MYC, HIGD1A, API5, CIB1, IRAK1, NOL3, PCID2, PRKCI, LEF1, SIX4, RHBDD1, UBE2B, PLAUR, NME2, PA2G4, AAMDC, TXNDC5, TNFAIP8, RIPK2, MDM2, PRNP, ZFAND6, YWHAZ, MTDH, MCL1, HAX1, MYDGF, PAFAH2, FHL2, PRKDC, PPT1, ASNS, BCL2L1, TIMP1, PTK2, HNRNPK, STK40, SQSTM1, XBP1, NPM1, TGM2, AATF, TAF9, GLO1, HS…	2630	455	16792	1.23486	1	0.533766	38.1814
