# Supplementary material for: Capture at the single cell level of metabolic modules distinguishing aggressive and indolent glioblastoma cells
Source: Acta Neuropathol Commun. 2019 Oct 16;7:155. doi: 10.1186/s40478-019-0819-y (PMC6796454; doi:10.1186/s40478-019-0819-y)
Supplement: Supplementary file 6 — Additional file 6: List of housekeeping genes used for data normalization. [file 40478_2019_819_MOESM6_ESM.xlsx]

## Sheet: Legend
Additional file 6. List of housekeeping genes used for data normalization (related to Fig. S2E).
Sheet 1: Legend. Sheets 2-3: Percentage of cells in which genes are detected (sheet 2), the coefficient of variation of their expression (sheet 2) and their auto-correlation (sheet 3) across all GBM cells are indicated. Computing gene expression values with the log2(CPM + 1) allows correcting sequencing depth variations between samples. We tested an additional step in the normalization of the seq…
Saurty-Seerunghen MS et al. Capture at the single cell level of metabolic modules distinguishing aggressive and indolent glioblastoma cells.

## Sheet: Descriptive statistics
Housekeeping gene used for data normalization	Mean expression in log2(CPM+1) across GBM cells	Standard deviation across GBM cells	Coefficient of Variation across GBM cells	Percentage of cells in which each gene is detected
RPL41	7.77145	1.4459	0.186053	99.0319
RPLP1	9.19952	1.84763	0.20084	98.7415
SERF2	8.67019	1.93841	0.223572	97.8703
RPS27	7.7373	1.83462	0.237113	98.2575
RPS14	8.52693	2.16728	0.254169	95.9342
RPS19	8.50479	2.29553	0.26991	95.547
RPL23A	7.64344	2.14354	0.280442	96.031
RPLP2	7.35974	2.23687	0.303933	95.2565
RPL37A	7.21459	2.26053	0.313328	94.9661
RPL36	7.32575	2.37596	0.32433	94.0949
RPL30	7.07821	2.42153	0.34211	93.4172
RPS26	5.74282	2.1797	0.379553	93.6108
RPL27	6.51395	2.5753	0.395351	90.4163
RPS25	6.17641	2.48612	0.402519	91.0939
RPL27A	6.52395	2.64145	0.404885	90.5131
RPL37	5.98348	2.50559	0.418752	90.3195
RPL38	5.64342	2.37523	0.420885	90.7067

## Sheet: Pearson correlation analysis
Pearson correlation coefficient
	RPL23A	RPL27	RPL27A	RPL30	RPL36	RPL37	RPL37A	RPL38	RPL41	RPLP1	RPLP2	RPS14	RPS19	RPS25	RPS26	RPS27	SERF2
RPL23A	1	0.377461	0.192754	0.298327	0.228042	0.239369	0.364716	0.345511	0.373536	0.329123	0.333993	0.431478	0.374538	0.320194	0.375036	0.389944	0.297397
RPL27	0.377461	1	0.168049	0.291034	0.270574	0.242269	0.306812	0.357432	0.322081	0.332003	0.232912	0.350077	0.367408	0.274685	0.320658	0.323785	0.21718
RPL27A	0.192754	0.168049	1	0.221453	0.242513	0.22948	0.282869	0.200021	0.27043	0.305762	0.277686	0.215938	0.188414	0.252704	0.186643	0.207123	0.257531
RPL30	0.298327	0.291034	0.221453	1	0.282272	0.276254	0.32643	0.289171	0.35993	0.394797	0.34336	0.37662	0.395366	0.225947	0.257036	0.32754	0.277477
RPL36	0.228042	0.270574	0.242513	0.282272	1	0.362585	0.311613	0.230132	0.398332	0.406314	0.31926	0.323435	0.289387	0.226097	0.240393	0.25395	0.303398
RPL37	0.239369	0.242269	0.22948	0.276254	0.362585	1	0.338759	0.251416	0.359537	0.338117	0.307332	0.402699	0.291359	0.279569	0.289989	0.314868	0.351943
RPL37A	0.364716	0.306812	0.282869	0.32643	0.311613	0.338759	1	0.322799	0.417119	0.386039	0.353111	0.392845	0.341536	0.329909	0.358234	0.413946	0.307728
RPL38	0.345511	0.357432	0.200021	0.289171	0.230132	0.251416	0.322799	1	0.321585	0.317258	0.292344	0.280512	0.333382	0.346846	0.308665	0.267185	0.25472
RPL41	0.373536	0.322081	0.27043	0.35993	0.398332	0.359537	0.417119	0.321585	1	0.513536	0.355621	0.372743	0.371599	0.32865	0.406374	0.459138	0.450838
RPLP1	0.329123	0.332003	0.305762	0.394797	0.406314	0.338117	0.386039	0.317258	0.513536	1	0.418627	0.345949	0.417031	0.328172	0.358992	0.419236	0.485924
RPLP2	0.333993	0.232912	0.277686	0.34336	0.31926	0.307332	0.353111	0.292344	0.355621	0.418627	1	0.358474	0.351783	0.290991	0.32531	0.282356	0.344523
RPS14	0.431478	0.350077	0.215938	0.37662	0.323435	0.402699	0.392845	0.280512	0.372743	0.345949	0.358474	1	0.487171	0.295104	0.394119	0.454719	0.31155
RPS19	0.374538	0.367408	0.188414	0.395366	0.289387	0.291359	0.341536	0.333382	0.371599	0.417031	0.351783	0.487171	1	0.293226	0.380213	0.469585	0.257006
RPS25	0.320194	0.274685	0.252704	0.225947	0.226097	0.279569	0.329909	0.346846	0.32865	0.328172	0.290991	0.295104	0.293226	1	0.290642	0.353935	0.265041
RPS26	0.375036	0.320658	0.186643	0.257036	0.240393	0.289989	0.358234	0.308665	0.406374	0.358992	0.32531	0.394119	0.380213	0.290642	1	0.393288	0.298122
RPS27	0.389944	0.323785	0.207123	0.32754	0.25395	0.314868	0.413946	0.267185	0.459138	0.419236	0.282356	0.454719	0.469585	0.353935	0.393288	1	0.28007
SERF2	0.297397	0.21718	0.257531	0.277477	0.303398	0.351943	0.307728	0.25472	0.450838	0.485924	0.344523	0.31155	0.257006	0.265041	0.298122	0.28007	1
Pearson correlation p-value
	RPL23A	RPL27	RPL27A	RPL30	RPL36	RPL37	RPL37A	RPL38	RPL41	RPLP1	RPLP2	RPS14	RPS19	RPS25	RPS26	RPS27	SERF2
RPL23A	NA	0	4.20188e-10	0	1.18572e-13	6.21725e-15	0	0	0	0	0	0	0	0	0	0	0
RPL27	0	NA	5.53242e-08	0	0	2.88658e-15	0	0	0	0	3.41949e-14	0	0	0	0	0	1.71152e-12
RPL27A	4.20188e-10	5.53242e-08	NA	6.08846e-13	2.66454e-15	8.23785e-14	0	8.77947e-11	0	0	0	2.30216e-12	1.04035e-09	0	1.4969e-09	1.79314e-11	0
RPL30	0	0	6.08846e-13	NA	0	0	0	0	0	0	0	0	0	2.00506e-13	0	0	0
RPL36	1.18572e-13	0	2.66454e-15	0	NA	0	0	6.9722e-14	0	0	0	0	0	1.93179e-13	4.88498e-15	0	0
RPL37	6.21725e-15	2.88658e-15	8.23785e-14	0	0	NA	0	2.22045e-16	0	0	0	0	0	0	0	0	0
RPL37A	0	0	0	0	0	0	NA	0	0	0	0	0	0	0	0	0	0
RPL38	0	0	8.77947e-11	0	6.9722e-14	2.22045e-16	0	NA	0	0	0	0	0	0	0	0	0
RPL41	0	0	0	0	0	0	0	0	NA	0	0	0	0	0	0	0	0
RPLP1	0	0	0	0	0	0	0	0	0	NA	0	0	0	0	0	0	0
RPLP2	0	3.41949e-14	0	0	0	0	0	0	0	0	NA	0	0	0	0	0	0
RPS14	0	0	2.30216e-12	0	0	0	0	0	0	0	0	NA	0	0	0	0	0
RPS19	0	0	1.04035e-09	0	0	0	0	0	0	0	0	0	NA	0	0	0	0
RPS25	0	0	0	2.00506e-13	1.93179e-13	0	0	0	0	0	0	0	0	NA	0	0	0
RPS26	0	0	1.4969e-09	0	4.88498e-15	0	0	0	0	0	0	0	0	0	NA	0	0
RPS27	0	0	1.79314e-11	0	0	0	0	0	0	0	0	0	0	0	0	NA	0
SERF2	0	1.71152e-12	0	0	0	0	0	0	0	0	0	0	0	0	0	0	NA
