# Supplementary material for: Capture at the single cell level of metabolic modules distinguishing aggressive and indolent glioblastoma cells
Source: Acta Neuropathol Commun. 2019 Oct 16;7:155. doi: 10.1186/s40478-019-0819-y (PMC6796454; doi:10.1186/s40478-019-0819-y)
Supplement: Supplementary file 7 — Additional file 7: Genes differentially expressed between low and high tumorigenic GBM cells and/or tissues. [file 40478_2019_819_MOESM7_ESM.xlsx]

## Sheet: Legend
Additional file 7 (related to Fig. 3). Genes differentially expressed between low and high tumorigenic GBM cells and/or tissues. Sheet 1: Legend. Sheet 2: Genes differentially expressed between GBM cells with low and high tumorigenic scores. Sheet 3: Genes differentially expressed between GBM tissues with low and high tumorigenic scores. Sheet 4: Genes found to be overexpressed in TumHIGH cells a…
Saurty-Seerunghen MS et al. Capture at the single cell level of metabolic modules distinguishing aggressive and indolent glioblastoma cells.

## Sheet: DE analysis - Cells
Genes differentially expressed (DE) between GBM cells with low and high tumorigenic scores (TumLOW and TumHIGH respectively)
Fold change = mean expression across TumHIGH cells (in log2(CPM+1)) - mean expression across TumLOW cells (in log2(CPM+1))
Gene	Fold Change = mean(TumHIGH cells) - mean(TumLOW cells)	Mann-Whitney p-value	Benjamini-Hochberg adjusted p-value
KCNE1L	-1.37335	1.78675e-08	1.81715e-07		MS Saurty, L Bellenger, E A. El-Habr, V Delaunay, H Chneiweiss, C Antoniewski, G Morvan-Dubois, MP Junier
BTG3	-1.24583	1.29496e-07	1.01132e-06		Signature-driven single cell transcriptomes analysis captures metabolic modules distinguishing aggressive
HSPB1	-1.14626	3.92045e-16	2.6181e-14		and indolent glioblastoma cells
LUZP2	-1.03366	1.22201e-07	9.63548e-07		Corresponding authors: marie-pierre.junier@inserm.fr, morvan-dubois@upmc.fr, herve.chneiweiss@inserm.fr
MTRNR2L1	-1.00178	3.54906e-15	1.88071e-13
IL13RA2	-0.989287	2.46643e-06	1.31821e-05
TM4SF1	-0.963126	0.000204953	0.000621986
NDRG1	-0.883427	0.000272765	0.000796568
TUSC3	-0.872905	7.31723e-08	6.13944e-07
UBE2E2	-0.855668	0.00014342	0.000455968
DDIT3	-0.852441	0.00181498	0.0041108
ATP2B1	-0.838346	0.00115339	0.00277666
NDUFC1	-0.836936	7.40686e-09	8.36483e-08
C1orf114	-0.834882	6.59842e-08	5.63383e-07
ERO1L	-0.807447	0.00141613	0.00331529
CA9	-0.793791	3.85208e-05	0.000143646
SAP18	-0.793664	3.34164e-08	3.11087e-07
PDLIM1	-0.776469	0.000142786	0.000454506
CREB5	-0.740892	0.00225457	0.00495719
RPL24	-0.707107	5.89633e-07	3.74828e-06
TMEM98	-0.705001	4.11645e-05	0.000152161
USMG5	-0.686732	2.89736e-05	0.000112134
RUNX1	-0.674138	0.00066662	0.00172405
HES1	-0.671206	0.000690894	0.00177839
FAM204A	-0.668371	0.0043458	0.00876054
C4orf48	-0.649384	0.000445108	0.00121451
P4HA1	-0.641972	0.00437278	0.00880678
SEZ6L	-0.620586	0.00176648	0.00401903
RPS3A	-0.615656	3.55559e-10	5.60712e-09
TGFBI	-0.604372	0.000372006	0.00103688
RPS27	-0.600811	1.84738e-13	6.39693e-12
RPL12	-0.59961	1.50102e-07	1.15096e-06
TREM1	-0.571533	9.25621e-07	5.59088e-06
PTPRN	-0.568864	0.000331678	0.000938462
NDUFA4L2	-0.565115	0.000115716	0.00037884
MRP63	-0.562185	0.00370867	0.00762771
EIF1	-0.549465	9.61982e-12	2.2207e-10
TMEM45A	-0.535439	0.00186681	0.00421288
SVIP	-0.533447	5.65563e-09	6.59773e-08
CD9	-0.516024	1.9819e-08	1.98478e-07
RAB32	-0.504329	0.00110544	0.00267747
CPNE8	-0.501015	0.000180011	0.000555698
RAPH1	-0.500635	0.00202201	0.00450103
PFDN2	-0.492723	0.00208931	0.00463509
RPS15A	-0.486832	2.45345e-07	1.7703e-06
MTRNR2L10	-0.476239	1.38126e-11	3.06429e-10
ADAM19	-0.472696	0.000536484	0.00143015
RPL34	-0.469416	3.68777e-07	2.50489e-06
SERF2	-0.463079	1.05696e-07	8.50832e-07
RPLP0	-0.458522	4.31571e-08	3.85586e-07
RPL37A	-0.456841	7.64951e-10	1.09906e-08
POTEE	-0.44387	1.20789e-05	5.21098e-05
RPS13	-0.435573	1.24036e-07	9.75662e-07
RPS26	-0.433234	3.10326e-06	1.60802e-05
FMOD	-0.414873	0.0012548	0.00298566
RPLP1	-0.414794	2.72445e-07	1.94123e-06
GTF2A2	-0.407655	0.00459839	0.00919187
RPL37	-0.402333	6.80632e-06	3.18968e-05
MAP1LC3B2	-0.402082	0.00421938	0.00853328
WIPF3	-0.401419	0.00343188	0.00714148
PAX3	-0.399403	0.00268604	0.00575504
RPS25	-0.398441	2.6789e-06	1.41103e-05
PDIA3P	-0.394171	0.000391458	0.00108555
TMSB10	-0.390446	1.89014e-05	7.72402e-05
FLRT3	-0.372713	0.00143243	0.00335164
NOP10	-0.366726	0.00265843	0.00570617
RPS14	-0.362195	8.74399e-12	2.03648e-10
LRRIQ1	-0.359676	0.000290441	0.000839943
RPL39	-0.357209	0.000890253	0.00221868
RPL9	-0.354519	2.82616e-05	0.000109572
RPL30	-0.347782	1.79346e-07	1.33682e-06
RPL27A	-0.346918	1.48526e-06	8.43408e-06
RPL18A	-0.340329	1.50614e-06	8.54156e-06
SPAG4	-0.338669	0.00328884	0.00687443
RPS19	-0.337051	5.50207e-11	1.04828e-09
FER1L4	-0.323048	3.98416e-05	0.000147856
MTRNR2L2	-0.322784	7.39629e-05	0.000256587
RPS29	-0.322072	0.00424329	0.00857502
SERPINB1	-0.321379	0.00221626	0.00488033
RPS28	-0.314391	6.40037e-07	4.03538e-06
RPL5	-0.302606	1.16443e-06	6.82849e-06
RPLP2	-0.296269	1.59002e-07	1.20788e-06
LOC100499405	-0.292172	5.85246e-05	0.000209126
STC1	-0.291196	0.000472887	0.00128096
NDUFS5	-0.291153	9.53485e-05	0.000319023
ATP6V1G1	-0.28516	0.00016316	0.000508599
RPL35A	-0.281973	1.46242e-06	8.33696e-06
RPL41	-0.277823	2.17071e-07	1.57759e-06
ATP5G2	-0.275154	0.000360471	0.00100924
RPL23	-0.26039	0.000935903	0.0023214
RPS8	-0.2588	5.04258e-06	2.44725e-05
OST4	-0.258572	0.000390455	0.00108346
BUD31	-0.24701	0.00267873	0.00574221
ATP6V0C	-0.236007	0.00279226	0.00595824
RPL23A	-0.213228	2.23268e-05	8.91233e-05
UBC	-0.210299	2.04346e-06	1.11585e-05
RSPO1	-0.204769	4.41398e-06	2.181e-05
RPS20	-0.197876	0.000110056	0.000361942
FAU	-0.193639	0.000785368	0.00199141
TCEB2	-0.193121	4.87388e-05	0.000176911
SNORA53	-0.178487	0.00161312	0.0037101
RPL14	-0.176022	0.00127836	0.00303729
RPL32	-0.173872	0.000220856	0.000663022
RPL10	-0.172144	1.7083e-08	1.74551e-07
PDIA3	-0.166848	0.00281816	0.0060047
GNG5	-0.160513	0.00410432	0.0083302
RPL7	-0.142229	9.89721e-08	8.03627e-07
RPS15AP10	-0.139194	0.00121247	0.00290021
PTMA	-0.136071	3.97331e-07	2.66975e-06
UQCRQ	-0.134475	0.00195739	0.00438552
NACAP1	-0.132864	6.80415e-05	0.000238574
SON	-0.132781	0.000395251	0.00109491
FDPSL2A	-0.107631	0.00175247	0.00399062
RPL19	-0.100397	3.58439e-05	0.000134584
RPL31	-0.096831	0.000271237	0.000792992
ZNF525	-0.092794	0.000128877	0.000415897
TPT1	-0.091355	8.79905e-06	3.96867e-05
MTRNR2L3	-0.0871952	0.00348687	0.00723749
MYL6	-0.0851509	0.00135671	0.00319618
RPS18	-0.0828398	0.00085274	0.00213822
NACA	-0.081573	2.53606e-05	9.97132e-05
RPL13	-0.0726094	0.000390928	0.00108454
RAN	-0.0666254	0.000456807	0.00124177
ATP6V1F	-0.066307	0.00131797	0.00311837
SH3BGRL3	-0.0540189	0.0046134	0.00921624
HINT1	-0.0277802	0.00346607	0.0072069
NPM1	-0.0194724	0.000397044	0.00109894
RPL15	-0.0145555	0.00159492	0.0036747
PSMA7	-0.00861889	0.00147482	0.00342877
SOD1	0.00258694	0.00325924	0.00682345
RPS6	0.00372398	7.96217e-06	3.65033e-05
RPL3	0.0168357	2.33997e-05	9.28679e-05
RPS23	0.0497103	0.00452054	0.00905422
LOC440905	0.0555007	0.000633565	0.00165128
TPI1	0.0645338	0.00421649	0.00853008
GTPBP6	0.0793635	0.00305057	0.00643288
AQP5	0.0848246	0.0023371	0.0051069
RPS7	0.0899153	0.00199045	0.00444516
FLJ39739	0.0924087	0.00230198	0.00504531
LOC653653	0.0993684	0.00257446	0.00554959
YWHAZ	0.100555	0.00242755	0.00527723
SNORD28	0.102671	0.00404902	0.008232
GATSL2	0.103455	2.6153e-05	0.000102521
SEPT5	0.104717	0.00220966	0.00486823
CD63	0.105916	0.00359004	0.00741871
MAGED4B	0.111238	0.000397193	0.00109913
CD302	0.114711	0.00179277	0.00406895
SCLY	0.115335	0.00123691	0.00294845
ZNF718	0.118164	0.000695923	0.00178747
BCAM	0.123851	0.00168344	0.00384681
ACRC	0.128663	0.00396887	0.00809293
ZNF175	0.129094	0.00435514	0.00877666
SYCE1L	0.129167	0.00281997	0.00600661
ZNF546	0.132724	0.0044246	0.00889337
PCDHB11	0.133005	0.00018526	0.000570288
LOC728989	0.135392	0.000524026	0.00140237
TTC36	0.138556	0.000219637	0.000659668
MIR3682	0.141445	9.73383e-05	0.000324519
ZNF674	0.141676	0.00487931	0.00968095
C17orf103	0.141719	0.00390962	0.00798706
PRR12	0.142069	2.33068e-05	9.26115e-05
LOC100129845	0.14255	0.00203062	0.00451867
LOC100288615	0.143544	0.00212604	0.00470779
SLC25A6	0.145442	0.00199446	0.00445181
MUSK	0.147357	0.00160304	0.00369144
ARRB2	0.148611	0.00387794	0.00793099
C8orf56	0.149226	0.00421888	0.0085336
C5orf27	0.150157	0.00236709	0.00516552
LIPT2	0.15089	0.00314376	0.00660281
ZNF554	0.15093	0.00451518	0.00904488
SNORD25	0.151467	0.00162598	0.00373508
LYSMD1	0.153414	0.000604523	0.00158601
ZADH2	0.153874	0.00391525	0.00799606
SRCIN1	0.155947	0.000599095	0.00157334
KCNN1	0.158089	0.00250615	0.00542199
NKD1	0.160088	0.00388506	0.00794308
COL11A2	0.16248	0.00485922	0.00964548
SPTLC3	0.163977	0.00207004	0.004597
CYP2D6	0.164019	0.000620871	0.00162467
DUOX1	0.164463	0.00410218	0.00832844
FLJ14186	0.165567	0.00285397	0.00606717
LOC728024	0.166458	0.00196589	0.0043993
C2CD4C	0.167741	0.00216889	0.00479052
ZEB1-AS1	0.168151	0.00283382	0.00603315
LOC100128590	0.168741	0.000818613	0.00206611
PRICKLE3	0.168797	0.00315373	0.0066195
CDKL1	0.169079	0.00345417	0.00718444
C5orf58	0.169505	0.00206129	0.00458146
FAM203A	0.171225	0.000124615	0.000404034
LOC728554	0.171282	0.00492217	0.00975269
CRSP8P	0.172021	0.00104926	0.00256178
PTCD1	0.172209	0.00129153	0.00306303
LOC645513	0.17295	0.00343672	0.0071504
SDCBP2	0.173363	1.78919e-06	9.92739e-06
XKR6	0.174063	0.00479549	0.00953489
A1BG-AS1	0.1741	0.00221167	0.00487185
STAB2	0.174154	0.000601922	0.00158014
RNF215	0.174482	0.00117861	0.00282854
ZNF69	0.174814	0.000950161	0.00234876
MCF2L	0.174822	0.00383555	0.00785535
PPP3CB	0.176197	0.00284076	0.00604401
PAQR7	0.1763	0.000337696	0.000953841
PIK3C2B	0.177808	0.00204992	0.0045593
MYH11	0.177902	0.00128183	0.00304498
LOC644554	0.177984	0.00393362	0.00802606
LOC100128811	0.178931	0.000871177	0.00217819
GIMAP2	0.179355	0.00371044	0.00763016
GPAT2	0.179631	0.00490243	0.00971946
CAMK1D	0.180003	0.00224895	0.00494648
ZDHHC11	0.180379	0.00376386	0.00772787
F8A1	0.180934	0.00189982	0.00427558
SEC16B	0.18126	0.00124303	0.00295926
TTC30B	0.181575	0.00149567	0.0034686
TAAR3	0.18168	0.000483971	0.00130774
SNORD116-26	0.181687	0.00177574	0.00403728
SCN1B	0.182165	0.00112525	0.00271891
ZNF417	0.182186	0.00451196	0.00904119
ZNF835	0.182395	0.00312589	0.00657054
SGK3	0.18254	0.000275161	0.000802492
LOC151534	0.184077	0.00173464	0.00395553
ICK	0.184205	0.00360375	0.00744351
BDNF	0.184507	0.00114573	0.00276229
FAM109A	0.184703	0.00312249	0.00656656
ZNF48	0.185431	0.00143987	0.00336243
TMED8	0.185433	0.000686489	0.00176949
ZNF815	0.185588	0.00312512	0.00656998
LOC401093	0.18585	0.000541234	0.00144076
PVRL1	0.186294	0.00414056	0.00839335
ADRB1	0.187012	2.26273e-05	9.01304e-05
FBN3	0.187482	0.00114022	0.00275052
NPIPL3	0.18824	0.00455259	0.00911005
TMEM65	0.188884	0.00416245	0.0084325
DNAJB2	0.189576	0.0020385	0.00453466
LOC729177	0.189711	0.00147114	0.00342142
PYROXD2	0.190262	0.00348964	0.00724095
METTL20	0.190472	0.00200042	0.00446209
ZFP2	0.190521	0.002283	0.00501127
NPAS1	0.190552	0.00302886	0.00639637
RNF122	0.191144	0.00378534	0.00776346
PCDHB13	0.192193	0.00151311	0.00350595
OVGP1	0.192237	0.000297526	0.00085646
C17orf56	0.192626	0.000901568	0.00224176
TNFSF13	0.193837	0.000580782	0.00153016
IQSEC2	0.193893	0.000549131	0.00145793
DCUN1D3	0.194795	0.00376521	0.00772822
NACC1	0.194808	6.20425e-05	0.000219896
AMZ1	0.196306	0.00262274	0.0056388
CCDC88C	0.196924	0.00167257	0.00382532
CD101	0.197073	0.000193758	0.000592963
C12orf53	0.197374	0.00264535	0.00567994
EFNA5	0.197481	0.00181427	0.00410989
HGD	0.197652	0.00265964	0.00570782
TBC1D16	0.198255	0.00402182	0.00818688
SLFN12	0.198926	0.000191297	0.000586665
PCYOX1L	0.199229	0.00417123	0.00844897
RAC3	0.199434	0.000151328	0.000476825
POC5	0.200359	0.00314951	0.0066117
ARX	0.200578	0.00208787	0.00463268
CMAHP	0.20103	0.0028358	0.0060354
SNAI2	0.201519	0.00342526	0.00712997
TSIX	0.201871	0.00274912	0.00587578
PCDHGC4	0.202157	0.0013942	0.00326803
PPP1R14A	0.202706	8.09014e-05	0.000277349
C9orf50	0.203215	0.00480521	0.00954986
C16orf46	0.203468	0.00387505	0.00792632
SPIN4	0.203468	0.000973629	0.00239952
SESN3	0.20361	0.0036694	0.00755882
RIBC2	0.20367	0.00122488	0.0029235
ZNF780B	0.204197	0.00370287	0.00761698
ABCC4	0.204322	0.00326091	0.00682586
TTLL9	0.204965	0.000286303	0.000830729
SIM2	0.205297	0.00349821	0.00725642
ABHD12B	0.205341	0.00272982	0.00583738
ZNF850	0.205631	0.000440414	0.00120396
C7orf10	0.205978	0.00200014	0.00446222
RCC1	0.20626	0.00325033	0.00680588
INHBB	0.20652	0.000941264	0.00233161
NRARP	0.206554	0.000411364	0.00113498
PTCHD2	0.206646	0.00108853	0.00264534
FAM117A	0.206863	0.00197073	0.00440938
SNORA18	0.207259	0.000309859	0.000886113
PRIC285	0.207385	0.00480945	0.00955538
PPM1N	0.207561	0.000612623	0.00160597
AGAP4	0.208282	1.77251e-05	7.3049e-05
SLC37A1	0.208578	0.00184076	0.00416559
NUDT4	0.208898	0.00357867	0.00740456
MBNL3	0.208933	0.00137582	0.00323421
ENTPD2	0.209991	5.61872e-08	4.86399e-07
LOC728875	0.210755	0.000821669	0.00207302
JMJD7	0.210895	0.00328692	0.0068715
CXorf1	0.211203	0.00184769	0.00417693
LOC100130093	0.211247	0.00107074	0.00261083
ZNF658	0.211346	0.00282026	0.00600624
CCDC9	0.212259	0.000938448	0.00232683
SCN9A	0.212566	0.00495473	0.0098083
NPTXR	0.213047	0.00276041	0.00589412
LOC100132273	0.213908	0.000275675	0.000803631
LOC100329109	0.213915	0.00460166	0.009197
CCDC150	0.215432	0.00113648	0.00274352
LRRC20	0.21597	0.00240906	0.00524576
ZNF280C	0.216304	0.00301045	0.00636058
PDE4A	0.216881	0.000515592	0.00138234
NAIF1	0.21727	0.0022789	0.00500394
CDK18	0.217274	0.00256753	0.00553557
FBXL16	0.217303	0.000444123	0.00121233
ITGA9	0.217464	0.00199597	0.00445443
LOC399744	0.217522	0.00177155	0.00402915
AKR1C3	0.217554	0.00114792	0.00276554
ZGLP1	0.21783	0.000919972	0.00228362
GSTT2	0.218366	0.000273502	0.000798543
RGNEF	0.218373	0.00195382	0.00437903
RHBDL3	0.21915	0.00130525	0.00309332
HIST2H2BF	0.219857	0.00256035	0.00552191
GLUD2	0.220305	5.76103e-06	2.75306e-05
TMEM144	0.220342	0.00243052	0.00528193
SCML2	0.220395	0.00108451	0.00263949
PARG	0.220623	0.0028339	0.00603236
EPHB6	0.220684	0.00227801	0.00500366
C8orf39	0.220895	0.000874507	0.00218443
FAM113B	0.221084	0.000571247	0.00150778
LANCL3	0.221598	0.00448236	0.00899152
SLFN13	0.221601	0.00026988	0.000789906
TAF4	0.221663	0.0016275	0.00373724
ZDHHC23	0.221802	0.00124046	0.0029553
TMEM163	0.221819	0.00202158	0.00450084
PPAN	0.221968	0.00141438	0.00331177
TBC1D10A	0.222	0.00281772	0.00600474
POPDC2	0.222286	0.00118464	0.00284093
MRM1	0.223376	0.00347075	0.00721432
RFXAP	0.223626	0.000180689	0.000557659
HOXA6	0.224492	0.00160845	0.00370131
PRDM16	0.224719	0.0020073	0.0044759
SYT12	0.227443	0.00103985	0.00254166
LOC100133331	0.227702	0.000943252	0.00233609
ATP1A3	0.227825	0.00010339	0.000342168
ZNF740	0.228043	0.00206393	0.004585
ZNF385B	0.228104	0.000146886	0.000465294
GTF2H4	0.22912	0.000571247	0.00150747
SNX18	0.229333	0.000789644	0.00200187
IKZF2	0.22946	0.00171825	0.00392088
LOC100506714	0.230016	0.000593144	0.00155834
C14orf64	0.230104	0.00388837	0.00794859
TNFRSF11B	0.230963	0.00285359	0.00606736
KIF7	0.231181	0.00488639	0.0096906
ERC2	0.231198	0.000288568	0.000835635
C17orf53	0.231413	0.00197449	0.00441477
PMS2L2	0.231443	0.000457964	0.00124415
PHEX	0.232068	0.000670914	0.00173412
LIN7B	0.232939	0.00369352	0.00760254
DIRAS1	0.232997	0.000404908	0.00111882
GALNT5	0.233305	1.53107e-05	6.44378e-05
ADCY7	0.2335	0.000756989	0.0019273
TLE6	0.233589	0.000175968	0.000544632
TBC1D30	0.2339	0.00187272	0.00422403
ZNF229	0.234239	0.00409606	0.00831859
C17orf97	0.234747	0.00496879	0.00983465
EPHX1	0.23497	0.000263773	0.000774457
CARM1	0.235215	0.00111556	0.0026985
TEAD2	0.235335	0.000211599	0.000639487
EEF1A2	0.235384	0.00050042	0.00134608
SUV39H2	0.235863	0.00230801	0.00505598
SNRNP48	0.235976	0.00149391	0.00346514
SPDYE1	0.236338	0.00174157	0.00396993
PCDHGB2	0.237073	0.00254796	0.00549791
LOC100505549	0.238175	0.000940619	0.00233045
CCDC125	0.238252	0.0049174	0.00974472
MPND	0.238371	0.000212757	0.000642393
FAM117B	0.238381	0.00306371	0.0064585
ZNF749	0.238419	0.00294688	0.00623836
ZNF691	0.23853	0.00340159	0.00708633
SHISA6	0.239099	0.000943374	0.00233595
STXBP5	0.239197	0.0019512	0.00437392
NHS	0.239255	0.000532006	0.00142053
CCDC160	0.239525	0.00035304	0.000991619
WDTC1	0.23969	0.00241895	0.00526377
CTIF	0.241171	0.00139032	0.00326186
TIPARP-AS1	0.24121	2.6976e-05	0.000105149
FAM116A	0.241764	0.00144053	0.00336338
INSM1	0.241836	7.22099e-05	0.000251572
TAF8	0.241851	0.00486342	0.0096509
ASPHD2	0.242499	0.00199099	0.00444483
KIAA1199	0.242641	0.00273256	0.00584134
RHBG	0.242804	0.000842616	0.0021173
LOC100506178	0.243586	0.00106438	0.00259628
PRRT1	0.243803	8.60141e-05	0.000292274
LNP1	0.243823	0.000762342	0.00193866
VWA3B	0.244559	0.00144554	0.00337086
STRN	0.244728	0.00237888	0.00518952
SLC45A1	0.24473	0.000964731	0.00238028
EBF4	0.244743	0.00124693	0.002968
EGLN2	0.244802	7.06003e-06	3.28857e-05
C1orf192	0.244936	0.00348963	0.00724208
ARMC2	0.244936	0.00431843	0.00871342
ZNF775	0.245396	0.00215675	0.00476692
MIR181A2HG	0.245612	0.000104274	0.000344572
CCDC73	0.2457	0.000155668	0.000487683
FLJ22184	0.245976	0.000846946	0.00212695
BAHCC1	0.246206	0.00152316	0.00352549
UTP14C	0.246354	0.00109034	0.00264776
MLL4	0.246396	0.00380663	0.00780099
LINC00472	0.246718	0.000410363	0.00113246
VSIG10	0.246937	0.00269295	0.00576608
SH3RF3	0.246967	0.000821962	0.00207336
FGF14	0.247707	0.00031583	0.000900239
CCDC71	0.247838	0.000359728	0.00100759
FAM86C1	0.248461	0.00339338	0.00707486
NET1	0.248673	0.000442604	0.00120894
PELI3	0.248824	0.00266628	0.00572019
C19orf73	0.249053	5.16114e-06	2.50016e-05
ATG4A	0.24913	0.00336502	0.00702132
LPCAT4	0.249221	0.00027918	0.00081186
CNTN2	0.249223	0.000554531	0.00147107
HLA-L	0.24926	1.35393e-05	5.77252e-05
ZC3H7B	0.249276	0.000751765	0.00191474
LOC441242	0.249317	0.00034549	0.000972916
BK250D10.8	0.249351	3.47507e-07	2.38267e-06
SEPT5-GP1BB	0.249713	0.000262031	0.000770206
ZNF620	0.249912	0.000640458	0.00166725
ZNF431	0.251006	0.000616569	0.00161502
MTPAP	0.251062	0.00475969	0.00947811
EPHA5	0.251286	0.00132992	0.00314154
LIN7A	0.251577	0.002249	0.00494575
TBC1D14	0.251652	0.00275588	0.00588734
WASH3P	0.252454	0.00152861	0.00353498
RAPGEF3	0.252483	0.00119266	0.00285806
SH3BP5L	0.252521	0.000986406	0.00242598
TXNDC16	0.252804	0.00256696	0.00553524
LRFN1	0.252883	0.000141632	0.000451379
EFCAB11	0.25316	0.00117315	0.00281801
WASH7P	0.253271	0.000230312	0.000688411
HOXD-AS2	0.253275	0.000125983	0.000407661
LOC100306951	0.253276	0.004108	0.00833507
FAM182A	0.254231	7.71713e-09	8.67034e-08
PPM1M	0.254508	0.00212604	0.00470699
KIAA0564	0.254886	0.00477552	0.00950385
INPP4B	0.254969	0.000937877	0.00232586
KCNC4	0.255173	0.000970604	0.00239341
ZNF600	0.25524	0.00294991	0.00624275
LOC100128398	0.255254	0.00213947	0.00473433
MED26	0.255359	0.000432996	0.00118716
PTPN23	0.255724	0.00100437	0.00246461
TRUB1	0.25575	0.000615283	0.0016123
CTU1	0.255857	0.00347394	0.00721752
FAM76A	0.255913	0.00353847	0.00733181
D2HGDH	0.256214	0.000744379	0.00189778
LOC100630923	0.256236	7.53719e-05	0.000260852
SLC25A16	0.256472	8.25276e-05	0.00028189
ATP13A5	0.257536	0.000140127	0.000447348
NUDT17	0.257891	0.00449979	0.00902094
LOC283856	0.258047	0.000121918	0.000396369
FLT3LG	0.258995	0.00247989	0.00537317
LOC100379224	0.259112	0.00122464	0.00292344
LOC113230	0.259291	0.00172905	0.00394346
PLEKHA7	0.259327	0.0028726	0.00609986
ZDHHC2	0.259445	0.000341676	0.000963212
FAM156A	0.259708	0.00248028	0.00537312
CCNF	0.26061	0.00347802	0.00722371
MAP4K2	0.26068	0.000541877	0.00144188
ZDHHC22	0.26075	0.00367644	0.00757214
ZNF575	0.261842	6.79654e-05	0.000238371
CHST14	0.262083	0.00451144	0.00904153
RAP2A	0.262434	0.00381125	0.00780924
NUDT8	0.26274	0.000469001	0.00127123
CA14	0.26286	6.80404e-06	3.18976e-05
MPHOSPH9	0.262984	0.000240346	0.000715462
KCNA2	0.263001	5.57068e-05	0.00020026
CACNB4	0.263258	0.000817151	0.00206321
ARID3B	0.263294	0.00234566	0.00512388
GSC	0.263375	0.00100834	0.00247296
SLC25A28	0.263474	0.000147251	0.000466225
TMEM100	0.264244	0.00219032	0.00483214
ISPD	0.264246	0.000162375	0.000506512
GPD1L	0.264269	0.00197374	0.00441461
LOC728730	0.264495	0.00179585	0.00407521
TMEM145	0.264601	1.07034e-05	4.6902e-05
SIRPB1	0.264702	1.12641e-08	1.21147e-07
COX18	0.264804	6.93273e-05	0.000242757
METTL4	0.265029	0.000869313	0.00217519
PPM1L	0.265125	0.00137554	0.00323413
BUB1	0.265593	0.000908213	0.00225528
EXOC6B	0.265693	0.00351148	0.00728165
PPIP5K1	0.265995	0.00189837	0.00427305
GRIK4	0.266114	0.000496176	0.00133658
CYP4F11	0.26653	0.00014233	0.000453386
ZSCAN22	0.266639	0.00302274	0.00638447
NOMO2	0.266649	0.00465825	0.00929449
LOC145474	0.267201	0.00165145	0.00378562
MALT1	0.267625	0.00486335	0.00965222
CYP2U1	0.267838	0.00280972	0.00598866
ADPRH	0.267932	0.00251292	0.00543573
TBC1D2B	0.267952	0.000551036	0.00146239
PTP4A3	0.268041	0.0013645	0.00321049
ZXDA	0.268073	0.000664805	0.00172003
GSK3A	0.268089	0.000163857	0.000510648
MYH7	0.26832	0.000254999	0.000752238
ADCK5	0.268616	0.000807758	0.00204225
ASMTL	0.268627	3.52378e-09	4.31457e-08
WDR62	0.268749	0.00094925	0.00234783
DLG3	0.269443	0.000830164	0.00209002
MIER2	0.269631	0.00490166	0.00971941
MIR3650	0.270058	0.000557029	0.0014765
SYNDIG1	0.270258	0.000323172	0.000917769
FONG	0.270278	0.000841535	0.00211499
MCF2L2	0.270476	0.00235462	0.00514175
KRBA1	0.270791	0.00445068	0.00893892
MASP2	0.271553	5.79197e-05	0.000207078
ARRDC1	0.271959	0.00249229	0.00539735
PSIMCT-1	0.272005	0.00249638	0.00540442
ZNF493	0.272404	0.00099528	0.00244459
PHLDB3	0.272412	0.000328619	0.000931418
RASGEF1A	0.272777	0.00166737	0.00381476
SLC26A2	0.272801	0.00422714	0.00854503
DACT3	0.273159	0.00221496	0.00487829
PLA2G6	0.273247	0.00383838	0.00785991
FBXL14	0.273669	0.00192457	0.00432458
MTBP	0.274178	0.00291476	0.00617735
LOC100288069	0.274523	0.00422583	0.0085437
CCDC136	0.274577	0.00184629	0.00417521
ZNF555	0.274657	0.00104233	0.00254677
LAMA1	0.274801	0.00129104	0.00306297
GRIA4	0.274838	0.00364793	0.00751815
EID2B	0.275147	0.00117599	0.00282379
CSK	0.27518	0.00246214	0.00533824
B3GALTL	0.275292	0.00373858	0.00768078
SLC2A4RG	0.27598	0.0025944	0.00558613
LOC286467	0.27634	0.002711	0.00580188
LAMP5	0.276441	0.00428058	0.00864638
RNF112	0.276539	0.000709084	0.0018177
COQ3	0.276919	0.00259412	0.00558645
ACBD4	0.276973	0.000501644	0.00134881
GLI2	0.277245	0.00152406	0.00352696
PDGFRB	0.277486	8.05236e-05	0.000276126
CAPS	0.277609	0.000226578	0.000678957
ATRNL1	0.278113	0.00128437	0.00305047
ZNF17	0.278136	0.00164389	0.0037696
ELK4	0.278273	0.00268852	0.00575847
H19	0.278539	0.00327034	0.00684121
RAP2C	0.27869	0.00253605	0.00547582
PRRG1	0.278817	0.00385873	0.00789664
RBM43	0.278854	0.0030042	0.00635045
ADO	0.279196	0.000650978	0.00169128
VWCE	0.279316	2.93832e-05	0.000113551
MAP1LC3C	0.279819	0.00500233	0.00989056
FLJ41200	0.280022	0.0010368	0.0025361
FAM123A	0.280247	0.00175656	0.00399854
NAT6	0.280511	0.00475858	0.00947733
C2orf81	0.280751	0.000568372	0.0015017
C1QTNF2	0.280891	3.23816e-05	0.000123067
ATP2B2	0.281209	0.000284466	0.000826133
ZNF35	0.281531	0.00129104	0.00306242
ABCC9	0.281596	0.000870049	0.0021762
CDH24	0.281648	0.000742547	0.00189384
KBTBD7	0.282184	0.00146824	0.00341529
COL9A3	0.282223	0.00152749	0.00353301
LOC729678	0.282353	0.000447516	0.00122058
SH2D4A	0.282367	0.00190339	0.00428139
MAP3K12	0.282498	0.000192639	0.000590226
SP8	0.283007	2.14725e-05	8.62125e-05
FLJ20021	0.283205	0.0036344	0.00749263
MESTIT1	0.283348	6.78667e-07	4.25027e-06
RDH13	0.283447	0.00292726	0.00620284
ZNF720	0.283622	0.00244962	0.00531725
PDF	0.283622	0.000894962	0.0022283
TMEM120B	0.283906	0.00255293	0.00550772
PDGFD	0.284468	6.09241e-05	0.000216342
RPS6KL1	0.284789	0.000441922	0.00120733
LOC100287015	0.284878	0.0025171	0.00544208
TRIM39	0.285055	0.00120637	0.00288827
PHF10	0.285091	0.0004031	0.00111429
TRIM62	0.285256	0.00208932	0.00463431
ZNF506	0.285638	0.00438116	0.00881959
ADCY9	0.285652	0.00339421	0.00707546
ANO5	0.286095	0.000743994	0.00189716
SELO	0.286241	0.00187791	0.00423355
CPEB2	0.286477	0.00213816	0.00473222
PRR5	0.286758	7.13778e-05	0.000248871
APAF1	0.28707	0.00132566	0.00313375
AP4S1	0.287226	0.000332587	0.000940427
LOC100652739	0.287517	1.78472e-07	1.33106e-06
MAK	0.287858	0.000533448	0.00142351
NUBPL	0.287978	0.00242311	0.00527021
WDR81	0.288353	0.00199946	0.00446147
FANCF	0.288367	0.00506165	0.00999276
NBPF9	0.289215	0.00146635	0.00341209
C1orf95	0.289314	0.00027114	0.000793061
DOCK6	0.290007	0.00459465	0.0091858
FURIN	0.290236	0.00386633	0.00790971
ACTB	0.2903	0.000178818	0.000552278
SSH3	0.290496	0.00403965	0.00821422
C15orf37	0.290584	2.48195e-05	9.78502e-05
APOBEC3G	0.290613	0.00166536	0.00381149
DND1	0.290626	0.0016699	0.00381987
DGKQ	0.290947	0.00121095	0.00289818
SMA4	0.291056	0.000324556	0.0009209
ARPP21	0.291522	0.00284739	0.00605515
CA11	0.291651	0.00131083	0.00310374
UPK3BL	0.292394	4.83414e-06	2.35921e-05
SPIN3	0.292509	0.00484727	0.00962615
ZNF772	0.292533	2.58121e-05	0.000101336
ZNF594	0.293116	7.94997e-05	0.000272829
ETNK2	0.293299	0.000642649	0.00167262
NICN1	0.293592	0.00289653	0.00614469
KIF13A	0.293912	0.00148713	0.00345248
C7orf43	0.293964	0.000204791	0.000621783
CLSPN	0.293965	0.00272509	0.00582918
IFI27	0.294319	0.000657294	0.00170397
ZNRF2P1	0.294356	0.000140194	0.000447451
ZSCAN12	0.294359	0.00233504	0.00510496
PPP1R13B	0.294437	0.00358157	0.00740939
C5	0.294865	0.00223939	0.00492794
COL5A3	0.294974	3.60419e-06	1.83347e-05
SLC13A4	0.295161	0.000381833	0.00106156
C14orf126	0.295213	0.0002913	0.000842056
MAP6D1	0.295464	0.000315408	0.000899232
LINC00092	0.295697	0.00122113	0.00291615
RPH3A	0.295708	0.00187544	0.00422943
PARS2	0.295829	0.000308193	0.000882506
PLEKHO2	0.296015	0.00107241	0.00261441
ZNF814	0.296253	0.00252519	0.00545685
GPR123	0.296453	0.00239345	0.0052187
LMNB1	0.296555	0.00362445	0.00747563
FLJ33630	0.296668	0.00136688	0.00321494
C16orf7	0.296795	0.000606412	0.00159065
NYNRIN	0.296887	8.67014e-06	3.92812e-05
STAG3L3	0.297008	0.000349225	0.000981535
SLC35C1	0.297318	0.00401708	0.00817977
ZC3H4	0.297395	0.00208716	0.00463189
XPO7	0.297445	0.00319284	0.00669728
ZUFSP	0.297503	0.000949323	0.00234757
OGDHL	0.297958	0.00372365	0.00765492
CLSTN3	0.298011	0.00375074	0.00770335
TMC7	0.298084	0.0020189	0.00449718
EML5	0.298844	3.03079e-06	1.57608e-05
VRK1	0.298991	0.00298418	0.00631118
HARBI1	0.299262	0.00141193	0.00330662
MMP14	0.299856	0.00023013	0.000688026
TBX2	0.299995	5.44923e-05	0.000196109
ADRB2	0.300084	0.00186405	0.00420883
SLC4A10	0.300127	5.87769e-06	2.80368e-05
FAM40B	0.300132	0.00290099	0.00615314
ATOH8	0.300193	0.000720874	0.00184287
HELQ	0.300693	0.00148823	0.0034538
KCNC1	0.300694	0.000438912	0.00120011
ZMYM1	0.300702	0.00171346	0.00391131
POLR2J4	0.300767	0.00331506	0.00692702
MID1IP1	0.301493	2.10895e-07	1.53526e-06
ANXA11	0.301519	0.00422345	0.0085402
C2orf44	0.301524	0.00112588	0.00271995
KRBA2	0.30164	3.87308e-05	0.000144265
UAP1L1	0.301664	0.00359131	0.00742015
LPAR6	0.302088	0.00084656	0.00212639
CAND2	0.303064	0.000144773	0.000459602
PALM2	0.303111	0.000281944	0.000819351
SNX32	0.303219	0.00146575	0.00341192
PLCD4	0.303229	0.00268178	0.00574687
TSPAN11	0.303251	0.00123302	0.00294025
KBTBD6	0.303259	0.00108637	0.00264253
NKX2-2	0.303625	0.00369705	0.0076074
FCF1	0.303934	0.00151337	0.00350593
C1orf53	0.304565	0.000416092	0.00114585
LOC728743	0.304624	0.000652594	0.00169447
LOC390940	0.304724	0.00306974	0.0064681
SPDYA	0.305014	0.000678041	0.00175116
CNOT6L	0.30503	0.001113	0.0026933
UCN	0.305059	0.00039318	0.0010901
C19orf57	0.305164	0.000964175	0.00237935
LOC100506795	0.305753	0.00306785	0.0064662
PPP1R9B	0.305899	0.000162205	0.000506225
SRBD1	0.306426	0.00458808	0.00917826
AGRN	0.306458	0.000510972	0.00137108
ZFAT	0.306697	0.000134009	0.000430757
BCORL1	0.306985	0.000348384	0.000979801
LRFN4	0.307097	0.00239931	0.00522973
PHLPP2	0.307155	0.00243613	0.00529149
FAM161B	0.30731	0.0011478	0.00276575
ESRRG	0.307403	0.00056076	0.00148488
DNAH1	0.307617	0.00288934	0.00613141
PCDHB3	0.307702	2.41789e-05	9.56704e-05
CRTC2	0.307765	0.00499121	0.00987156
ZNF30	0.308091	0.000493924	0.00133134
C14orf45	0.308198	4.04419e-05	0.000149828
ZNF74	0.308285	0.00116251	0.00279502
RAB26	0.308301	0.000450153	0.00122598
NAALADL2	0.30881	0.00327862	0.00685635
SFT2D3	0.308847	0.00185457	0.0041903
ADAMTS18	0.30904	7.82588e-05	0.000269135
SCLT1	0.309239	0.00402091	0.0081863
ZNF665	0.309336	0.000174259	0.000539851
RRN3P2	0.309495	1.32099e-05	5.64678e-05
PCYT1A	0.309641	0.00114409	0.00275885
ZFP14	0.309644	0.00121282	0.00290052
C16orf95	0.309963	0.000131288	0.000422944
HERC5	0.310084	0.00354237	0.00733873
NPHP3-ACAD11	0.310699	0.000546835	0.00145331
CSGALNACT2	0.310773	0.00246179	0.00533837
PHACTR1	0.310809	0.000171959	0.000533991
TNRC18	0.310979	2.39352e-05	9.47347e-05
C16orf52	0.310986	0.00138214	0.00324616
APBA1	0.311015	0.000180899	0.000558178
AMBRA1	0.311043	0.00237055	0.00517222
LOC100506233	0.311532	0.00436267	0.00878914
QRICH2	0.311678	0.0030404	0.00641556
PAK6	0.311738	8.25918e-05	0.000282036
SLC9A1	0.312089	0.00323304	0.00677511
FAM160A2	0.312282	0.00502372	0.00992685
CACNB3	0.312715	0.000510459	0.00136998
RNF121	0.312856	0.00087827	0.00219299
LRRC61	0.312873	0.00385879	0.00789554
ZNF287	0.313167	0.00247986	0.005374
B3GALT2	0.313172	0.000179069	0.000552922
KDELC2	0.313465	0.00109324	0.00265432
MYT1	0.313494	0.000141164	0.000449999
GPRASP1	0.313526	0.000520244	0.00139395
SERP2	0.313668	0.000804845	0.00203646
STON1	0.313917	0.00130377	0.00309038
GRIK5	0.314166	0.000484585	0.00130913
ZNF613	0.314286	0.00116911	0.00280934
TMEM198	0.314299	0.000146349	0.000463929
SLC15A3	0.314386	0.000123126	0.000399701
ZNF497	0.314425	0.00181074	0.00410404
MSTN	0.314433	0.000996788	0.00244783
MCEE	0.314457	0.00192596	0.00432547
SMARCD2	0.314611	0.00323629	0.00677975
CNOT3	0.314669	3.17467e-05	0.000121182
HOXA7	0.315118	0.00434258	0.0087554
TRIM3	0.315455	5.21663e-05	0.00018862
TRPM3	0.315493	0.00189132	0.00425938
ANKRD42	0.315517	0.00120074	0.00287531
TMEM56	0.315793	0.000494171	0.00133173
TOR2A	0.316018	0.0040284	0.00819645
LOC100288778	0.316081	8.563e-06	3.88631e-05
FLJ90757	0.316395	0.00289073	0.00613338
RECQL4	0.316615	0.000662305	0.00171492
ATP6V1G2	0.316796	0.00119841	0.00287078
FAM188A	0.316953	0.00358476	0.00741246
PGM5	0.317042	1.82078e-07	1.3541e-06
PPIEL	0.317316	0.000968356	0.00238832
STX2	0.317614	0.00212443	0.00470503
C1orf194	0.31776	0.00418669	0.00847635
AACS	0.317854	0.00148503	0.0034482
FAM71F2	0.318032	7.85461e-07	4.84263e-06
PPP2R2A	0.318227	0.00498983	0.00987331
KLC2	0.31828	0.00303594	0.00640927
UNC13A	0.318871	0.000526178	0.00140784
PIGW	0.318972	0.00326821	0.00683894
C11orf95	0.319073	0.000293534	0.000846457
UNC80	0.319078	0.00159224	0.00366916
ENTPD1	0.319147	0.00233563	0.00510539
CC2D1B	0.319528	0.00271848	0.00581599
TF	0.319543	6.23092e-05	0.000220602
ATP11C	0.319621	0.00261598	0.00562519
ZNF414	0.319853	0.000700512	0.00179784
TET3	0.319858	0.00062332	0.00162944
PEX14	0.319893	9.46707e-05	0.000317079
ATHL1	0.320366	0.00286174	0.00608074
LOC100132356	0.320413	9.31389e-05	0.000312829
PCDH18	0.320468	0.00389201	0.0079548
TAB1	0.320539	0.00266866	0.00572342
EFNB3	0.320803	0.000286949	0.000832051
CHAC2	0.321208	0.000722569	0.00184685
WWP1	0.321443	0.00373241	0.00767051
CRIM1	0.321456	0.00193332	0.00433904
PEX11G	0.321546	7.28177e-05	0.00025315
SUFU	0.322003	0.00014953	0.000472412
TSHZ2	0.322195	0.00244633	0.005311
GPATCH3	0.322327	0.00398858	0.00812554
NS3BP	0.322759	1.21675e-05	5.24229e-05
TEX2	0.322766	0.00403407	0.00820542
SLC46A3	0.322767	0.00464138	0.00926506
TDRD7	0.323039	0.000193114	0.000591406
SH2B2	0.323047	9.66369e-05	0.000322509
IL6	0.323323	0.00193984	0.00435143
C4orf33	0.323412	0.000899249	0.00223684
TAB3	0.323622	0.00117638	0.00282423
ZNF28	0.323676	0.00467928	0.00933076
ARSG	0.32389	0.00263135	0.00565452
FIZ1	0.324002	0.000252786	0.000746888
KLF15	0.324436	5.85472e-05	0.000209093
LINGO1	0.324645	6.40308e-06	3.02127e-05
C9orf85	0.324813	0.000375354	0.00104532
SNPH	0.324929	0.00012153	0.0003955
ARHGAP39	0.325081	0.000114426	0.000374899
TAPT1	0.325146	0.0034288	0.00713619
PTCHD4	0.325251	4.31234e-05	0.00015824
ZNF776	0.325634	0.00108573	0.00264147
RSBN1L	0.325716	0.000321602	0.000913904
MAST3	0.326194	0.00261297	0.00562149
WDHD1	0.326645	0.000177749	0.000549363
ZNF589	0.326797	2.19886e-05	8.79612e-05
ZBTB7A	0.327017	0.000566985	0.00149894
WASH2P	0.327029	6.10045e-06	2.89307e-05
TLE2	0.327319	9.25365e-05	0.000311205
C20orf7	0.327403	0.00350329	0.00726582
RAD18	0.327802	0.00392235	0.00800681
UCP2	0.328023	0.00218918	0.00483043
DUSP18	0.328856	0.00172595	0.00393708
RACGAP1	0.329151	0.000505654	0.00135848
RTTN	0.329473	0.000329734	0.000933974
ABCA8	0.329484	0.00253834	0.00547984
NCK2	0.329813	0.00351813	0.00729313
ALKBH1	0.329919	0.00184651	0.00417497
SORCS2	0.330256	0.000119225	0.000389063
HDAC11	0.330401	0.000225557	0.000676207
POLL	0.330447	0.000715605	0.00183155
DSCC1	0.330612	0.000218553	0.000657165
SH2B1	0.330634	0.000140579	0.00044857
LOC100128071	0.330777	5.44865e-05	0.000196143
KIAA0528	0.331138	0.00183045	0.00414368
METTL10	0.33176	0.0010813	0.00263315
DOK1	0.332313	0.000520752	0.00139503
POLR1A	0.332611	0.0041312	0.00837696
LRIG3	0.332706	0.000348725	0.00098055
PAX8	0.332792	0.00141094	0.00330489
ZNF649	0.333051	0.0034044	0.00709105
ZMYM6	0.333191	0.00242856	0.00527856
C1orf187	0.333217	0.00175942	0.00400436
BTN2A2	0.333241	0.0020207	0.00449965
CPOX	0.333257	3.1808e-05	0.000121274
GUSBP11	0.333817	0.00294156	0.0062291
DCLRE1C	0.334062	0.00268892	0.00575839
TMEM170B	0.334109	0.00161066	0.00370573
GCLC	0.334337	0.00447162	0.00897685
FILIP1L	0.334475	0.00247884	0.00537266
MARK4	0.334506	0.00228611	0.0050164
TTC30A	0.334606	0.00012943	0.000417269
LSM12	0.334655	0.00225893	0.0049651
PCDHB10	0.335125	0.000602836	0.00158222
KIAA1609	0.335177	0.0037943	0.00777939
SLC22A18	0.335281	0.00490888	0.0097293
LOC375010	0.335324	0.00043694	0.00119672
MAPK12	0.335351	0.00029997	0.000862357
DHX33	0.335414	0.00054945	0.00145848
IRAK4	0.335716	0.00065468	0.00169853
KCTD17	0.335835	0.0015254	0.00352942
KBTBD4	0.335896	0.00356984	0.00739214
MARC1	0.336021	0.00290328	0.006156
ZNF526	0.336253	2.16388e-05	8.6774e-05
ZNF710	0.336578	0.000130396	0.00042028
RAB20	0.337023	4.65078e-05	0.000169518
ZNF419	0.337208	0.00258576	0.00557119
ATG14	0.338009	0.00341618	0.00711445
MFAP3L	0.338029	0.00384645	0.00787273
GEN1	0.338058	0.00194174	0.0043542
PIGZ	0.338236	0.000245901	0.000729015
ZNF641	0.338399	0.00250578	0.00542207
PECR	0.338414	0.000123808	0.000401517
HECA	0.338475	0.000259495	0.000763265
CYP3A5	0.338744	0.00285783	0.00607441
ZNF662	0.338781	0.00057301	0.00151182
ZNHIT6	0.338904	0.00451222	0.00904033
FAM176B	0.338949	0.00124302	0.00295979
JAK2	0.339137	0.00463131	0.00924777
CLEC18A	0.339242	6.75434e-07	4.23408e-06
SDC1	0.339296	0.0026862	0.00575444
SGMS1	0.339854	0.00453277	0.00907593
B3GAT2	0.339869	2.25193e-05	8.97277e-05
HOXA3	0.339913	0.000102084	0.000338445
TMCO4	0.339968	0.000557323	0.00147698
ZNF501	0.340231	0.000720313	0.0018418
DZIP3	0.340306	0.0028228	0.00601067
ZBTB22	0.340339	0.0011383	0.0027474
MPPED2	0.340514	0.00391821	0.00800085
AKD1	0.340591	0.000762321	0.00193899
FTSJD1	0.340922	0.000706709	0.00181197
RPGR	0.341115	0.00303108	0.00640003
CCHCR1	0.341262	0.00135743	0.00319729
REEP4	0.341609	0.00019219	0.000588991
PPFIA2	0.341621	0.00171676	0.00391816
GINS1	0.342151	0.000267667	0.000784481
C7orf53	0.342429	0.00166101	0.00380487
UNC79	0.342546	0.00304268	0.00641831
CCDC77	0.342643	0.000898103	0.00223527
THOC3	0.342643	0.00158787	0.00366102
SCN7A	0.342702	0.00429724	0.00867467
SGK223	0.342801	0.000157939	0.000494087
PPP1R8	0.343081	0.00109411	0.00265447
NOL9	0.343163	0.00326472	0.00683274
CCDC165	0.343304	0.000287359	0.000832869
CACNA1D	0.343345	0.00012156	0.0003955
CIB2	0.343361	0.000118874	0.000388015
C15orf52	0.343703	1.82427e-05	7.49227e-05
CROCC	0.343928	0.000990816	0.002435
VRK2	0.34443	0.00196191	0.00439416
MICAL3	0.344525	0.00432387	0.00872171
ARG2	0.344718	0.000883641	0.00220388
MEIS3	0.344854	0.00287296	0.00609962
RDH14	0.344936	0.001102	0.00267014
C19orf47	0.345176	0.000475823	0.00128838
SETBP1	0.345523	0.00469906	0.0093645
CCDC85C	0.345559	3.48928e-05	0.000131239
TRAF3	0.346257	0.000833294	0.00209709
STRN3	0.346296	0.000505933	0.00135895
LOXL3	0.346512	0.00357407	0.00739854
RIN2	0.347411	0.000346182	0.000974447
TOP1MT	0.347755	0.00447195	0.00897613
SLC12A2	0.347776	0.00450396	0.00902792
E2F1	0.348051	0.00119192	0.00285732
AMMECR1	0.348161	6.13313e-05	0.000217611
PPP1R3F	0.348215	0.000273882	0.000799475
KCNMA1	0.34847	0.00143878	0.00336048
LOC100507567	0.348952	0.000292835	0.000844998
NAV3	0.349011	0.00108697	0.0026435
ZNF319	0.349056	0.000230399	0.000688513
ARHGEF11	0.349088	0.00026049	0.000765847
SPAST	0.349149	0.000380966	0.00105982
NADSYN1	0.349488	0.00248592	0.00538445
SART3	0.349551	0.00407517	0.00828003
CCNE2	0.349714	0.00265385	0.00569727
PTK2B	0.349915	0.00242348	0.00527013
GFOD1	0.350093	3.80014e-05	0.000141831
TTC26	0.350589	0.00290193	0.00615414
TRMU	0.350603	0.00357546	0.00740024
PRC1	0.350661	0.00377626	0.00774724
PAPD7	0.35069	0.00226707	0.00498047
RNF111	0.350713	0.00137811	0.00323901
HNRNPUL2	0.35075	9.57614e-05	0.000320158
ZNF516	0.350761	0.000996848	0.00244752
ACAD11	0.350764	0.000266656	0.000781868
UBE2O	0.350842	0.00161754	0.00371895
LOC93622	0.350954	0.000108561	0.000357204
ENDOV	0.351147	0.00311539	0.00655584
TRIM25	0.351527	0.000421518	0.00115933
BTBD9	0.35165	0.000103938	0.000343632
OAS2	0.351671	0.000139105	0.000444842
PMS2P4	0.351863	0.00397027	0.00809326
PYGO2	0.351874	0.00468841	0.00934753
EPN1	0.352108	5.05697e-05	0.0001831
POLR3D	0.352128	0.00365484	0.0075312
C14orf102	0.352265	0.000187611	0.000576712
ZSCAN16	0.352284	0.000689393	0.00177487
NHLRC2	0.352517	0.000528523	0.00141325
TMEM161B	0.353045	0.000371534	0.00103579
DNM1	0.353069	0.000489873	0.00132178
DOHH	0.35309	0.0015388	0.00355665
FAM18A	0.353122	0.00429482	0.00867113
RPP21	0.353699	0.00356087	0.00737473
LCLAT1	0.354069	0.000270975	0.000792756
GTF2E2	0.35408	0.00410078	0.00832688
ZNF45	0.354146	0.00110849	0.00268339
KCTD6	0.354196	0.0044069	0.00886324
DCC	0.354272	0.000398624	0.00110262
ACOX2	0.354303	0.00043206	0.00118484
CAMKMT	0.354678	0.000446149	0.0012171
ZNF615	0.355433	0.000619462	0.0016213
MTMR1	0.355565	0.00469306	0.00935539
LRRTM3	0.355935	0.000661314	0.00171303
STOX2	0.356095	0.000509252	0.0013673
PPARGC1A	0.356118	0.00323682	0.00677977
MDGA1	0.356291	6.95122e-06	3.24829e-05
G2E3	0.356434	0.000974799	0.00240195
C3orf23	0.356492	0.00112752	0.0027229
DAZAP1	0.356742	0.00140661	0.00329536
TTF1	0.356764	0.00135114	0.00318591
NPEPL1	0.356838	7.23259e-07	4.50368e-06
OCRL	0.356865	0.00431875	0.00871272
GATAD2A	0.35755	0.0010933	0.00265398
GPD1	0.357709	2.35842e-05	9.34867e-05
FAM131B	0.357872	1.85037e-05	7.58282e-05
PPP1R26	0.358103	0.00253566	0.00547587
SLC38A9	0.358106	0.00116077	0.00279134
GCAT	0.35898	0.00479281	0.00953245
SLITRK2	0.359451	0.00459139	0.00918348
TNFAIP2	0.359595	0.00411195	0.0083418
ELK1	0.359715	0.000592738	0.00155759
PPWD1	0.359893	0.00286475	0.00608614
FAT3	0.359992	0.00346967	0.00721324
SLC12A6	0.36001	7.78933e-05	0.00026809
TMEM187	0.360143	0.000823561	0.00207699
SIPA1L3	0.360267	0.000701068	0.00179892
LRRTM4	0.360303	6.47367e-05	0.000228393
TMEM183A	0.360737	0.00231415	0.00506521
ZNF713	0.360813	0.0007684	0.00195217
PICK1	0.360877	0.000216668	0.000652696
LRCH4	0.361016	0.00351292	0.00728348
RBM45	0.36156	0.000855285	0.00214296
TGFB3	0.361581	0.00239089	0.00521399
CHST1	0.361785	0.00362516	0.00747476
MAP7	0.361918	0.000367958	0.00102713
GPT	0.362004	0.000879316	0.00219519
ZIK1	0.362041	0.00131249	0.00310711
C6orf136	0.362218	0.00144514	0.00337052
HOXC10	0.36229	0.00254212	0.00548711
MOB4	0.362364	0.00311169	0.0065491
ARHGAP42	0.362659	0.00179587	0.00407457
KDM5B	0.362772	0.00493682	0.00977728
MAPK7	0.362819	0.00243807	0.00529482
ABCD2	0.362916	0.000421714	0.00115889
LOC100507032	0.362955	0.000156826	0.000490723
SPDYE6	0.363205	2.38414e-06	1.27946e-05
MCM9	0.363469	0.000305255	0.000875817
MBD5	0.363612	0.00467491	0.00932346
FTSJ3	0.363795	0.00230818	0.00505552
GPR162	0.364051	0.000113741	0.000372843
CTDNEP1	0.364137	0.000643962	0.00167571
PID1	0.364378	0.00214266	0.00474057
APOBEC3C	0.364545	0.00286916	0.00609453
WHAMM	0.364783	0.000308049	0.000882287
FOXM1	0.364815	0.00108891	0.00264577
SAP30L	0.365101	0.00259084	0.00558031
RANBP10	0.365128	0.000658739	0.00170703
SYNC	0.365142	0.000125059	0.000405074
PDIK1L	0.36543	0.00178399	0.00405252
VPS33B	0.36555	0.00115471	0.00277934
LOC100216545	0.36578	0.00184616	0.00417564
MAP3K6	0.365836	0.0040608	0.00825467
PORCN	0.365878	0.00175047	0.00398676
EPB41L4A	0.365934	0.0033888	0.00706756
LOC100505783	0.36657	0.00164219	0.00376637
RABEP2	0.366911	0.000316749	0.00090227
SYNGR3	0.367233	0.000458851	0.00124578
CERS6	0.367298	0.00200151	0.00446374
GRK4	0.367501	0.000137952	0.000441913
GLIS2	0.367634	0.00501731	0.00991718
IRF7	0.368014	0.00358848	0.00741783
TEFM	0.368021	0.00186719	0.00421301
KREMEN2	0.368085	2.24244e-05	8.93766e-05
ZNF37BP	0.368357	0.00174251	0.0039707
MYO19	0.368399	0.00229603	0.00503479
SCUBE2	0.368803	4.05201e-05	0.000149991
C4orf42	0.368876	0.00317439	0.00665965
ANKS3	0.369186	0.00495382	0.00980798
BCL11A	0.369239	1.35545e-05	5.77712e-05
MIR5047	0.369428	0.00438363	0.0088232
HAUS4	0.369592	0.00229262	0.00502902
ST6GAL1	0.369831	3.17002e-05	0.00012104
HLA-G	0.369867	3.30652e-09	4.07141e-08
BCAT2	0.370195	0.000403203	0.00111434
SCPEP1	0.370422	0.00188266	0.00424279
NSUN6	0.370432	0.00103626	0.00253573
APITD1	0.370602	0.000337957	0.000954167
CPVL	0.370622	0.000277634	0.000807905
CENPB	0.370796	5.03865e-06	2.44807e-05
CENPO	0.370809	0.000653242	0.00169581
MKS1	0.370812	0.00102564	0.00251209
LOC81691	0.371248	0.000248493	0.000735866
CYP46A1	0.371601	2.13809e-05	8.59241e-05
SEMA3E	0.371642	0.000140609	0.000448557
FAM73B	0.371695	0.000276304	0.000804749
FAR2	0.371969	9.32198e-05	0.00031302
ZNF43	0.372149	0.000356783	0.000999985
DBNDD2	0.372162	8.18139e-05	0.000279964
MT1L	0.372236	0.000660272	0.00171067
KCNF1	0.372302	0.000297705	0.000856787
CDC20	0.372357	0.000683195	0.00176273
DNAJC22	0.372453	1.53674e-06	8.68873e-06
IBTK	0.372736	0.00490464	0.00972238
CTAGE5	0.372769	0.000286811	0.000832018
TMEM57	0.372892	0.00209882	0.00465382
NBEA	0.372951	0.00304128	0.0064164
ENOX2	0.37322	0.00157442	0.00363322
FBXW8	0.373381	0.00478102	0.00951334
PABPC1L	0.373427	0.00187935	0.00423606
ZRSR2	0.373529	0.00151988	0.00351915
RGS14	0.37362	4.13207e-05	0.000152566
TMEM132B	0.373656	0.00428772	0.00865812
ACCN4	0.37369	1.80926e-05	7.43528e-05
MRPL30	0.373714	0.000408243	0.00112684
CHEK1	0.37383	0.00477013	0.00949601
APOM	0.374005	1.16527e-05	5.06046e-05
C3orf62	0.37402	8.3218e-06	3.80056e-05
ODZ1	0.374181	0.000469901	0.0012734
TNXB	0.374214	0.000421531	0.00115912
DCLRE1B	0.374331	0.000437689	0.00119777
C4orf19	0.374463	6.31368e-05	0.00022329
NSUN5P1	0.374491	0.00218211	0.00481727
CPNE5	0.374496	2.64321e-05	0.000103398
SLC39A10	0.374513	0.00430396	0.00868689
LOC100288911	0.374656	3.53904e-06	1.80524e-05
RRN3	0.374768	0.00166339	0.00380765
STK32A	0.374771	0.00242468	0.00527186
MRVI1	0.374776	1.04729e-05	4.60928e-05
RAB2B	0.375131	0.00234598	0.00512373
ARHGAP18	0.375131	1.4467e-07	1.1165e-06
RTN4IP1	0.375329	5.3818e-05	0.000193896
QSOX1	0.375541	0.000699313	0.00179512
CCP110	0.375693	0.00261351	0.00562173
RFFL	0.375718	9.55036e-05	0.000319378
MBTPS2	0.375721	0.00181118	0.00410431
JARID2	0.375733	0.00153091	0.00353966
BRCA1	0.375737	0.00132309	0.00312825
MEF2BNB	0.375774	0.0024538	0.00532369
ZNF133	0.375774	0.00162267	0.00372813
EXOC8	0.375879	0.000880177	0.00219692
FSD1	0.375893	0.000340841	0.00096148
ADD2	0.375911	0.000814612	0.00205799
SENP7	0.376007	0.00402625	0.00819335
ALMS1	0.376174	0.00480399	0.00954889
CCDC159	0.376213	0.00408127	0.00829113
NCKAP5L	0.37637	8.97971e-05	0.000303161
PEX7	0.37659	0.000384526	0.00106746
ZNF343	0.376621	0.0002121	0.000640556
STK3	0.376672	0.00498988	0.00987191
SMO	0.376837	0.00148966	0.0034565
LRRC45	0.37689	0.000117112	0.000383028
TMPRSS5	0.376928	0.000198309	0.000605333
PGAP3	0.37704	0.00010422	0.000344478
LRRC37A4	0.377354	0.00077361	0.00196388
PIAS4	0.377594	0.00146597	0.00341181
E2F5	0.377819	0.00115057	0.0027704
NAGPA	0.377839	0.000904373	0.00224788
OGFR	0.377883	0.00262599	0.00564487
ACTR3B	0.378344	0.00412822	0.00837221
ARNT	0.378593	0.00459277	0.00918343
MMP16	0.378777	7.01233e-05	0.000245347
ZCCHC10	0.37892	0.00260597	0.00560827
RGS6	0.379086	0.00164565	0.00377297
ZDHHC12	0.379294	0.00402314	0.00818828
MID1	0.379434	0.000705281	0.00180866
DENND4A	0.3795	0.00188727	0.00425172
HRASLS	0.379604	0.000729044	0.00186158
IFIT1	0.379903	0.00193623	0.00434482
SYT3	0.379954	0.000190706	0.000585265
AP1AR	0.380174	0.000451633	0.00122924
EBP	0.380438	0.00440314	0.00885703
PTCH1	0.38056	0.00116066	0.00279159
PCCA	0.380818	0.00110062	0.00266778
CDC40	0.381406	0.00396904	0.00809202
SLC9A3R2	0.381518	5.9148e-05	0.000210836
SOX21	0.381549	7.0418e-08	5.93497e-07
C14orf23	0.381713	0.00230551	0.00505136
LOXL1	0.382166	0.000479849	0.00129821
DTX2	0.382214	3.40306e-05	0.000128365
XKR8	0.382482	0.000851171	0.00213592
TMCO7	0.382599	0.000539318	0.00143683
LLGL1	0.382773	8.95136e-07	5.43434e-06
PDE5A	0.382979	0.000287374	0.000832731
WWC2	0.383256	0.000498854	0.00134241
CADPS2	0.383558	0.00504237	0.0099577
SESN1	0.383573	0.00261498	0.00562397
DNAJC17	0.383632	0.00358618	0.00741423
ANLN	0.383876	0.00103813	0.00253841
ESRRA	0.383972	0.00147498	0.00342792
GMEB2	0.384172	9.77712e-05	0.00032563
C1orf85	0.384317	0.00478938	0.00952707
PPCDC	0.38436	0.00253145	0.00546769
CIT	0.384415	2.76391e-05	0.000107318
ZXDB	0.384453	0.000691034	0.00177805
SEPSECS	0.3846	0.00131364	0.00310927
RECQL5	0.384823	0.000127179	0.000410921
AMT	0.384932	0.000590734	0.00155357
TRADD	0.384989	0.00221642	0.00487986
RBFA	0.385211	0.002067	0.00459104
SLC7A6OS	0.385336	0.000217348	0.000654295
MTA1	0.385429	1.0819e-06	6.4135e-06
LIMK1	0.385503	2.8806e-05	0.000111518
NOP14-AS1	0.385671	0.000943447	0.00233569
TEKT4P2	0.385737	0.00230882	0.00505607
ARVCF	0.385803	0.000452169	0.00123044
GUSBP1	0.38608	4.22741e-05	0.000155604
XYLT2	0.386128	8.8661e-06	3.99478e-05
IKBKG	0.386151	9.58905e-05	0.000320508
DPY19L2P2	0.386167	0.000187361	0.000576079
BRF2	0.386231	0.000630225	0.00164421
DLG4	0.386338	3.89212e-05	0.000144892
ATAD3B	0.386396	7.42805e-06	3.43797e-05
ARMCX4	0.386489	0.00212439	0.00470574
PIP4K2A	0.386795	0.000236813	0.000705586
DHODH	0.386809	0.00417389	0.00845305
GAS6	0.386819	9.01365e-05	0.00030415
CBR4	0.386864	0.000583808	0.0015369
LINC00340	0.386929	0.00068916	0.00177462
LRRC37B	0.386949	0.000219497	0.000659549
TIMM9	0.386959	0.00476001	0.0094773
LHFPL4	0.387003	4.03251e-05	0.000149523
D4S234E	0.387055	1.10014e-05	4.80953e-05
RNASET2	0.387069	0.00165227	0.00378684
INPP5E	0.387393	0.00437838	0.00881671
NUP43	0.38761	3.41672e-05	0.000128695
PPP4R2	0.387675	0.000106765	0.00035218
ZNF232	0.387699	0.00372483	0.00765613
LOC653566	0.387834	4.81561e-07	3.14529e-06
FLII	0.387917	0.00249832	0.00540773
SLC25A48	0.388042	4.21082e-05	0.000155124
CDK11B	0.388236	0.000451025	0.00122784
MEGF10	0.388498	0.00501247	0.00990912
RNF8	0.388545	0.00181006	0.00410391
MCU	0.389135	0.000266141	0.000780532
MFHAS1	0.389242	0.000296137	0.00085321
TFB1M	0.389345	0.000847483	0.00212789
CACNB1	0.38983	0.00082101	0.00207176
SAPCD2	0.389843	5.34892e-05	0.000192764
APOLD1	0.389906	3.69726e-06	1.87353e-05
EEFSEC	0.390072	0.00275842	0.00589084
FAM179B	0.390126	0.00352474	0.00730452
FKBPL	0.390138	9.63314e-05	0.000321736
SNRNP35	0.390246	0.000959762	0.00236936
GRIK1-AS2	0.390449	4.20536e-07	2.79553e-06
STAM2	0.390554	0.00159919	0.00368387
FBLN5	0.390613	0.00227928	0.00500395
MTMR10	0.390672	0.000482185	0.00130372
NFE2L1	0.390706	0.000342778	0.000965696
BDH1	0.39095	0.00382782	0.00784074
MED20	0.390955	0.00223062	0.00491028
NANP	0.391003	9.45199e-05	0.000316655
TRIM65	0.39107	0.00121646	0.0029071
KCND2	0.391254	0.000484851	0.00130958
PKN2	0.391416	0.00431843	0.00871475
MTERF	0.391931	0.000336712	0.000951266
AP3S2	0.391968	4.26026e-05	0.000156548
C15orf38	0.392035	0.000128594	0.000415083
ARFIP1	0.392253	0.00277785	0.00592943
TRNT1	0.392306	0.00397659	0.0081049
UBR3	0.392411	0.000883348	0.00220357
ZSCAN29	0.392502	0.00101222	0.00248153
KLC4	0.392572	0.000946133	0.00234145
WDR44	0.392627	0.000417004	0.00114764
BDNF-AS1	0.392627	9.28143e-06	4.15474e-05
SLC29A4	0.392795	0.000872971	0.00218143
CUEDC1	0.393131	9.36647e-05	0.000314272
CITED1	0.39372	0.000249298	0.000737914
MFSD11	0.393778	0.00480532	0.00954863
WDFY3	0.393861	0.00228815	0.00502005
HIATL2	0.393894	0.00121228	0.0029003
EFR3A	0.393909	0.000762648	0.00193906
FGF2	0.393974	0.000565753	0.00149689
AKAP11	0.393999	0.00161699	0.00371835
LYAR	0.394141	0.00336001	0.00701198
RNGTT	0.394378	0.00307712	0.00648157
THAP3	0.394712	0.00163131	0.00374404
CEP97	0.395066	0.000795421	0.00201495
FAM5C	0.395298	0.00136104	0.00320407
TATDN2	0.395793	0.0007256	0.00185351
LOC285033	0.396	1.87033e-08	1.88749e-07
RHBDD1	0.396538	0.00135444	0.00319255
PI4KAP2	0.396872	4.85762e-05	0.00017637
CHAMP1	0.39695	0.000429743	0.00117972
FAM19A5	0.396957	0.000173734	0.000538735
TCOF1	0.397085	0.001175	0.00282194
TRIT1	0.39711	0.00360872	0.00745025
ZNF583	0.397278	0.00297169	0.0062868
FLJ39051	0.397528	5.58033e-06	2.67647e-05
MYO5C	0.397971	0.00014884	0.000470571
CPSF2	0.398064	0.00504925	0.00996978
TACO1	0.398076	0.00133995	0.00316352
NEIL1	0.398145	0.000139324	0.000445326
SLC50A1	0.398421	0.00313877	0.00659338
ANKDD1A	0.398427	0.000110215	0.00036228
AXIN1	0.398562	0.00296269	0.00626878
SIPA1	0.398687	0.00144134	0.00336408
CCDC88B	0.398761	0.00103854	0.00253893
AP1G1	0.398807	0.00324536	0.00679655
PLCB1	0.398826	1.53444e-05	6.45591e-05
KDM1B	0.398994	0.00150097	0.00347843
EPHB4	0.399245	0.000255811	0.000754125
ZFP1	0.399303	0.0010822	0.00263485
CSTF2T	0.399393	0.000271189	0.000793028
SLC24A2	0.399675	1.62449e-05	6.77597e-05
PLA2G4C	0.39988	0.00128522	0.00305137
DCHS2	0.399917	2.17727e-05	8.72041e-05
SCAF1	0.400096	3.03566e-07	2.1248e-06
ADSS	0.400201	0.00200817	0.00447708
ZNF180	0.400265	0.00036509	0.00102065
SMURF1	0.400277	0.00145421	0.00338867
SOCS4	0.400594	0.000834898	0.00209992
TMEM229B	0.401153	1.71477e-05	7.10498e-05
KGFLP1	0.40124	1.84281e-05	7.55655e-05
STX18	0.40133	0.00472282	0.00940754
PRPS2	0.401439	0.000526704	0.00140896
ZFYVE16	0.401477	0.00306843	0.00646637
MXD1	0.401616	0.00410396	0.00833075
C14orf80	0.401857	5.575e-05	0.000200305
CHD3	0.402068	0.00415054	0.00841226
VPS8	0.402196	0.0012869	0.00305481
POLD1	0.402238	0.00135649	0.00319623
FBXO33	0.402261	0.000745061	0.00189914
NUAK2	0.402285	0.000833759	0.00209746
LOC100506409	0.402323	8.50396e-07	5.19647e-06
CWF19L2	0.402418	0.000449791	0.00122525
CYP4F24P	0.402519	0.000196287	0.00060028
FRMD6	0.402529	0.000529467	0.00141462
RSAD2	0.402548	0.000182924	0.000563627
USP46	0.402692	0.00085278	0.00213791
LOC100129250	0.402792	8.10697e-05	0.000277853
ASB13	0.402807	1.14962e-06	6.75073e-06
TSEN2	0.402862	0.00241273	0.00525199
ProSAPiP1	0.402948	0.000794612	0.00201329
MMS22L	0.40302	0.00157844	0.00364055
DOCK3	0.403041	0.000175574	0.00054367
UNC13B	0.403114	0.000133166	0.000428259
SUV39H1	0.403126	6.67835e-05	0.000234729
TMC6	0.40324	6.83988e-06	3.20427e-05
PIK3IP1	0.403271	0.000125424	0.000406052
ST6GALNAC4	0.4033	0.00382255	0.00783116
KREMEN1	0.40395	2.56558e-06	1.36175e-05
SCAND2	0.404083	0.000430812	0.00118216
ZNRD1-AS1	0.404335	3.0017e-06	1.5622e-05
CTC1	0.404488	0.000679862	0.00175552
SOCS2	0.4045	0.000297061	0.000855496
KIAA0664	0.404717	0.000105946	0.000349741
ZNF805	0.404848	0.00433449	0.00874043
FNTB	0.404874	1.80951e-07	1.34648e-06
STARD13	0.404946	0.00143823	0.0033598
PANK3	0.405013	0.00446	0.00895626
ASXL2	0.405279	0.000806127	0.00203852
REEP6	0.405523	1.97785e-05	8.03478e-05
LRRC17	0.405539	0.00057051	0.00150613
DBP	0.405678	0.000329116	0.000932627
KAT6B	0.405725	0.00037214	0.00103703
AMOTL1	0.405755	0.000537536	0.00143266
CBX6	0.405892	1.16931e-05	5.07463e-05
NR2C1	0.406222	0.00196354	0.0043963
GIT1	0.406225	0.00403859	0.00821336
SUSD4	0.406326	0.00180667	0.00409693
RNFT2	0.406408	0.000997583	0.00244841
MCAM	0.406768	0.00311804	0.00655932
LOC100133286	0.406948	7.53217e-07	4.67466e-06
MEF2D	0.407278	3.74975e-05	0.00014007
PTAR1	0.407313	0.00275046	0.00587767
ABHD6	0.407519	0.000414131	0.00114189
PUS7L	0.407549	0.000211626	0.00063942
UBIAD1	0.407653	0.00232595	0.00508679
PTK7	0.407678	0.000183286	0.000564478
CAHM	0.407944	4.2018e-06	2.09115e-05
C6orf106	0.407975	0.00392178	0.0080069
HS1BP3	0.408008	0.000639822	0.00166626
TRIM32	0.408089	0.00103714	0.00253645
LEPRE1	0.408133	0.0013842	0.00324924
CCDC74A	0.408217	0.00143627	0.00335582
EYA2	0.408253	0.000191293	0.000586789
OMA1	0.408638	0.000118179	0.000386326
PGGT1B	0.40878	0.000144465	0.000458844
C1QTNF6	0.408845	0.00014184	0.000451933
N4BP2L1	0.409252	0.000364929	0.00102041
OAF	0.409576	1.03403e-05	4.56627e-05
SPTBN2	0.40959	2.36333e-06	1.27089e-05
NLE1	0.409866	0.000976193	0.00240448
NMNAT3	0.409981	0.00128483	0.00305101
SIAH2	0.410192	0.00266064	0.00570903
MARVELD1	0.410354	0.00012483	0.000404432
BLOC1S3	0.410461	4.26113e-05	0.000156537
ATXN7L1	0.410512	3.7663e-05	0.000140648
LOC100508120	0.410585	2.77141e-06	1.458e-05
GNPNAT1	0.410778	0.00156688	0.00361773
UNK	0.411128	0.00169036	0.00386061
TFPT	0.411184	0.000541637	0.00144154
FAM134C	0.411388	0.00118091	0.00283301
IRF2BPL	0.411431	6.6995e-05	0.000235345
C6orf130	0.411714	0.00219069	0.00483133
ZCCHC3	0.412083	0.0010739	0.00261755
ARMC5	0.412327	0.00453888	0.00908679
LRRC1	0.412542	0.000176056	0.000544774
CIDECP	0.412753	0.00219764	0.0048442
MEF2C	0.412961	4.11806e-05	0.000152178
SLC25A46	0.413142	0.00313079	0.00657767
TMEM185A	0.413299	0.000585658	0.00154146
F8	0.413455	0.000414522	0.00114273
MTRR	0.413569	0.00231826	0.00507335
SSBP3	0.413628	0.000174096	0.000539604
RIC8B	0.413708	0.000958725	0.00236724
PIGO	0.413733	0.00269796	0.00577587
HSPB2	0.414186	5.20426e-06	2.51546e-05
NRG2	0.414186	4.84776e-08	4.25569e-07
CENPH	0.414203	0.00362117	0.00747005
PDCD7	0.41443	0.00132997	0.0031411
F11R	0.414499	0.00205698	0.00457344
L3MBTL2	0.41451	0.00174164	0.00396941
CDK10	0.414535	0.00373823	0.00768127
FAN1	0.414934	0.00144348	0.00336787
LAS1L	0.414977	0.000652181	0.00169407
CDR2L	0.414988	0.000183384	0.000564647
C5orf30	0.415185	0.00011625	0.000380398
FAM98C	0.415216	0.000617356	0.00161644
BOLA3-AS1	0.415327	3.10276e-05	0.000119062
BEST3	0.4154	7.0885e-06	3.30065e-05
C1orf216	0.415417	0.00181381	0.00410956
HSD17B1	0.415497	1.97185e-05	8.01789e-05
MERTK	0.415533	5.24935e-06	2.53444e-05
FAM111A	0.41555	0.00231309	0.00506373
DHFRL1	0.415588	0.00478813	0.00952604
VASH1	0.415633	0.00109332	0.00265354
PEG3	0.415723	0.000421654	0.00115897
MIB2	0.416175	0.000612354	0.00160559
LDB2	0.416251	5.93255e-06	2.82779e-05
ZNF200	0.416397	0.000722742	0.00184693
ZNF195	0.416472	0.00339172	0.00707251
SRCRB4D	0.416553	8.83823e-05	0.000299156
DAB2IP	0.416747	2.46069e-05	9.70996e-05
RABGGTA	0.416748	9.22776e-05	0.000310494
SBF1	0.416904	0.00126012	0.00299776
C18orf1	0.417037	0.000382364	0.00106258
RRM2B	0.417144	0.0034573	0.00718981
ZNF793	0.417159	0.000210169	0.000635899
CLASRP	0.417248	9.38349e-05	0.000314763
RHPN2	0.417464	0.000309635	0.000885859
OCEL1	0.41776	0.000681812	0.00175986
PTPRK	0.418036	0.000359526	0.00100724
HLA-F	0.41817	1.8902e-07	1.39779e-06
MIR497HG	0.418276	0.0008257	0.00208078
FBXO45	0.418288	0.000935259	0.00232024
SNX14	0.418783	0.0046291	0.00924479
PYCRL	0.419128	0.000318294	0.000906473
ACOT1	0.41939	6.1152e-07	3.878e-06
MANEAL	0.419593	0.000531591	0.00141971
GGCX	0.419807	0.00484837	0.00962687
DUSP22	0.420016	6.83229e-05	0.000239432
RUNDC1	0.420302	0.00361734	0.00746451
ZNF587	0.420313	4.06707e-05	0.000150506
EYA3	0.420643	0.00193308	0.00433924
SRPX2	0.420778	0.00110678	0.00268022
C6orf57	0.420825	7.70806e-05	0.000265642
PACSIN3	0.420905	0.000347594	0.000978001
UPF2	0.420997	0.000658009	0.00170548
CCDC75	0.42103	6.6291e-05	0.000233374
ORAI1	0.421158	0.000528603	0.00141288
EID2	0.421158	0.00123502	0.00294447
MANEA	0.42126	5.27997e-05	0.000190489
GPATCH1	0.421389	3.50829e-05	0.000131916
CORO7	0.42143	0.000137748	0.000441476
C3orf19	0.421488	0.00294942	0.00624271
BAK1	0.421606	0.00044474	0.00121376
MBOAT1	0.421802	2.27154e-06	1.22506e-05
SLC27A4	0.422342	8.50169e-05	0.000289486
ZFYVE26	0.422536	0.000100341	0.000333172
RAD23B	0.422686	0.00038311	0.00106398
ARIH1	0.423414	0.00136348	0.00320924
CPNE4	0.423483	6.03453e-05	0.000214578
NSUN3	0.423651	0.000449023	0.00122367
DHX57	0.423662	0.00054793	0.00145503
THAP8	0.423741	0.00121741	0.00290831
PCDHGA1	0.423758	6.33007e-08	5.4224e-07
C1orf96	0.423851	0.00347777	0.00722434
SLC35E1	0.423919	0.00105974	0.0025864
FLRT1	0.424019	7.33941e-05	0.000254883
PSEN2	0.424241	0.000447534	0.00122037
ANKRD46	0.424308	0.000254045	0.000749764
NT5C2	0.424422	0.00347211	0.00721601
GFM2	0.424493	0.00252749	0.00546094
MRPS27	0.424667	0.00335594	0.00700684
PGS1	0.424772	0.00236685	0.00516587
HEATR6	0.424808	0.000569176	0.00150352
SEC24A	0.424953	0.00122364	0.0029216
ACSF2	0.425196	1.8667e-06	1.03094e-05
EML6	0.425826	1.6728e-05	6.95308e-05
TMEM150A	0.426182	0.00165977	0.00380269
INTS6	0.426309	0.000216939	0.000653212
POLR2J3	0.426762	0.00205938	0.00457799
LPXN	0.427184	1.37568e-05	5.85001e-05
RYK	0.427221	0.000588136	0.00154736
CDT1	0.427237	2.66427e-05	0.000104098
PHF21A	0.427337	0.00439755	0.00884715
PKIB	0.427619	0.000984154	0.00242135
SLC13A3	0.427673	0.000274806	0.000801813
HSD17B11	0.427675	0.000882232	0.00220121
ST3GAL2	0.427736	8.99395e-05	0.000303563
FBXO44	0.428013	0.00240209	0.00523492
TRIM23	0.4281	0.000652331	0.00169412
ZNF578	0.428235	5.25053e-05	0.000189584
SGPL1	0.428456	0.0042357	0.00856101
FUK	0.428605	0.000650614	0.00169067
MMP24	0.428943	3.4977e-06	1.78833e-05
CEP63	0.428982	0.00485372	0.00963603
NIF3L1	0.429005	0.00190395	0.00428193
PRDM2	0.429476	0.0045505	0.00910727
HAP1	0.429606	5.96026e-05	0.000212282
FASTKD1	0.429853	0.000357931	0.00100299
ZNF280D	0.429981	0.00121502	0.00290421
ZNF192	0.430022	0.00477304	0.00950035
ZNF677	0.430258	0.000899139	0.00223699
DOT1L	0.430788	0.00124939	0.00297331
MYSM1	0.430841	0.00130558	0.00309354
WASH1	0.430847	1.03639e-05	4.57206e-05
NIPSNAP3A	0.43124	0.00166159	0.00380419
RRP7A	0.431256	0.00129915	0.00307999
SAMHD1	0.431282	4.26561e-05	0.000156657
COIL	0.43138	0.000863441	0.00216133
LOC100505854	0.431832	0.00211342	0.0046838
SUMF1	0.431939	0.00401252	0.00817176
ATG16L2	0.431972	0.000183093	0.000564016
ANKS6	0.432094	0.000275185	0.000802381
RABL2B	0.432115	0.000766586	0.00194832
COG6	0.432203	0.000301573	0.000866584
LSM6	0.432212	0.00362451	0.00747459
QTRTD1	0.432459	0.000205816	0.000624173
LNPEP	0.432525	7.61846e-05	0.000263178
USP18	0.432566	2.05092e-05	8.29301e-05
CCNDBP1	0.432598	0.00193748	0.00434688
RNF44	0.432599	0.000305193	0.000875831
F12	0.43264	0.000366491	0.00102347
C12orf52	0.432738	0.00220393	0.00485726
PION	0.432815	0.00182297	0.00412818
PP7080	0.432827	0.000892541	0.00222396
EDEM3	0.43283	0.000939859	0.00232945
MCPH1	0.433263	0.000885657	0.00220849
C6orf118	0.433552	7.87982e-05	0.000270848
SPIN2B	0.43362	7.0541e-06	3.28931e-05
NHLRC3	0.433779	0.000365643	0.00102197
CHPF2	0.433783	0.00448233	0.00899284
KCTD15	0.433796	0.00335754	0.00700908
LIX1L	0.433906	0.000249897	0.000739353
NSDHL	0.434041	0.00361069	0.00745313
METTL21A	0.434099	0.000693453	0.00178322
CANT1	0.434317	0.000560521	0.00148455
WRAP73	0.434439	0.0025214	0.00544957
RNF123	0.434442	0.000637812	0.00166136
ZNHIT2	0.434483	0.00033512	0.000947178
BAX	0.434586	0.000106913	0.000352402
CPT1A	0.434696	4.51398e-06	2.22286e-05
TMEM132E	0.43474	0.000289683	0.000838679
MGC27345	0.434769	0.000719702	0.00184096
RGS11	0.43497	2.67173e-05	0.000104295
STAT5B	0.435021	0.00134458	0.00317274
SORD	0.435162	8.12211e-05	0.000278299
ZNF347	0.43536	0.00084842	0.00212984
GPR107	0.435446	0.0027264	0.00583102
C1orf56	0.435512	3.70473e-05	0.000138546
ROBO1	0.435562	0.00399866	0.0081448
CASQ1	0.435594	1.01416e-06	6.05581e-06
C22orf25	0.435619	0.00019271	0.000590307
HEPH	0.435808	9.16275e-05	0.000308545
TSHZ1	0.435816	0.000176473	0.000545935
ZBTB10	0.436132	9.90352e-06	4.39563e-05
DZIP1	0.436136	0.000277514	0.000807735
SHPRH	0.436177	0.00232168	0.00507914
FAR1	0.4364	0.00157666	0.00363709
HAGHL	0.436487	0.000271698	0.000793984
TICAM2	0.436542	1.34944e-06	7.75704e-06
WDR7	0.436593	0.0020126	0.00448467
ZNF197	0.436603	1.2058e-05	5.20539e-05
TNK2	0.43662	0.00126567	0.00300933
LENG8	0.436621	0.00303791	0.00641238
SLC43A2	0.436935	4.77904e-06	2.33406e-05
COG1	0.436941	0.00191426	0.00430288
RAVER1	0.437368	0.00363764	0.00749812
RHBDL1	0.437392	1.52972e-05	6.44223e-05
FIG4	0.437487	0.000784798	0.00199036
MED23	0.437614	0.000235694	0.000702893
MSX1	0.437801	0.00220581	0.00486057
AIFM1	0.438236	0.00088208	0.00220125
C1orf213	0.438245	4.55667e-05	0.000166412
YIPF1	0.438295	0.0043916	0.00883653
ANGPTL2	0.438658	0.000529387	0.00141469
BIN3	0.438853	0.000710385	0.00181997
ZNF304	0.438938	0.00337808	0.00704744
SYNRG	0.439384	0.000353883	0.000993134
GPN2	0.439412	0.000740163	0.0018885
LOC100192378	0.439748	1.5155e-06	8.58718e-06
OSBPL9	0.439849	0.00311727	0.00655874
LHX2	0.439896	0.00012	0.000391494
C1GALT1C1	0.439926	0.000695782	0.00178781
XAB2	0.440177	1.65056e-05	6.87375e-05
SOWAHC	0.440197	0.000118267	0.000386516
RBM19	0.440221	0.00437873	0.00881605
TOMM40L	0.44046	1.80249e-05	7.4098e-05
ATPAF2	0.440693	0.000120259	0.000392146
THAP1	0.440773	0.000186505	0.000573717
ZDHHC14	0.440861	3.59063e-05	0.000134741
MSI1	0.440874	2.73111e-07	1.9428e-06
RNASEH1	0.440969	0.0006972	0.00179004
THAP7	0.441156	0.00285968	0.00607735
PIK3R3	0.44122	0.000202333	0.000615034
WBP1	0.441256	9.55804e-08	7.78502e-07
KHK	0.441318	0.000102511	0.000339687
USP42	0.441343	0.00258144	0.0055628
KHNYN	0.441499	0.0023369	0.0051073
RREB1	0.441759	4.73347e-05	0.000172341
VARS2	0.441772	1.28946e-05	5.52283e-05
ZFP64	0.441904	5.69259e-05	0.00020397
POLR2C	0.442138	0.00227879	0.00500454
PDDC1	0.442153	0.00177821	0.0040422
STS	0.44217	3.3568e-05	0.000126839
CWC22	0.442253	0.00100563	0.00246724
ZNF708	0.442321	0.00118062	0.00283284
PLXND1	0.442378	7.06795e-05	0.000246766
TMEM79	0.442496	2.74579e-05	0.000106709
ATP10B	0.442528	1.60883e-06	9.04551e-06
DDB2	0.442601	0.00281846	0.00600437
COQ6	0.442869	0.00255657	0.00551466
NR2F6	0.442961	0.00320959	0.0067292
CEP250	0.443184	0.00174915	0.00398445
YRDC	0.443362	0.00136807	0.00321716
THSD1	0.443405	1.17264e-05	5.08404e-05
IPO4	0.443623	0.00247032	0.00535509
APOD	0.443659	0.000153585	0.00048266
SLC39A11	0.443688	3.33561e-05	0.000126148
LRP3	0.443859	3.21759e-05	0.000122463
AUH	0.444208	0.00147141	0.00342143
EIF4EBP2	0.444471	0.00394474	0.00804749
YDJC	0.444502	0.000693655	0.00178304
FGGY	0.444605	8.21298e-05	0.000280751
CEP19	0.444633	0.00219614	0.00484173
SGPP1	0.444674	4.1864e-05	0.000154311
RAD17	0.444679	1.08864e-05	4.76561e-05
SETMAR	0.444856	0.000212984	0.000642929
AKAP7	0.444955	0.000159103	0.000497492
KIAA1549	0.444974	0.00144251	0.00336619
PPOX	0.444991	0.0022838	0.00501217
CTPS2	0.444998	0.000291414	0.000842014
TCN2	0.445022	0.00031465	0.000897462
LZTR1	0.445243	0.00479373	0.00953283
GNG4	0.445376	0.00190263	0.00428042
GPBP1L1	0.445387	0.00166607	0.00381245
JAKMIP1	0.445732	1.84731e-05	7.57263e-05
GTPBP3	0.445802	0.000258682	0.000761045
C6orf162	0.445867	0.00011666	0.000381646
SHROOM1	0.446656	0.0048328	0.00959887
DGKZ	0.446798	0.000154797	0.000485303
ZNF408	0.446877	0.000978456	0.00240914
PLXNA3	0.447282	0.00188872	0.00425425
ZNF783	0.447401	6.68491e-05	0.000234896
FBXL15	0.447427	0.000339466	0.000958013
NAA30	0.447787	7.64785e-05	0.000263915
GABPA	0.447846	0.00143398	0.00335228
SCAI	0.447948	4.47847e-05	0.000163968
ARFGEF1	0.447982	0.00481299	0.00956097
LRIG2	0.448011	8.04123e-06	3.68141e-05
LYN	0.448026	0.00240709	0.0052432
DTX3	0.44815	0.00012923	0.000416725
ATM	0.448174	0.00116769	0.00280696
REEP1	0.448202	4.55751e-05	0.000166397
CEPT1	0.448249	0.0016613	0.00380419
KBTBD11	0.448542	0.000242014	0.00071961
ACY1	0.448613	9.27234e-06	4.15209e-05
TAF1B	0.448691	0.00345134	0.00717968
PRKRIP1	0.448824	9.13643e-05	0.000307737
IGFBP6	0.448842	0.00109793	0.00266274
CPD	0.448946	0.000625142	0.00163388
KIAA1586	0.448988	0.00015483	0.000485289
CUL4B	0.449011	0.000302428	0.00086866
IGFBP4	0.449051	0.000407453	0.00112514
DHRS11	0.44907	1.15648e-05	5.02561e-05
UBAP2	0.449237	0.00360548	0.0074459
TESK1	0.44934	0.000188403	0.000578875
GPR158	0.449395	8.32869e-06	3.80238e-05
NUDT15	0.449545	0.000626564	0.00163629
SLMAP	0.449546	0.000154196	0.000484347
TP53	0.44964	0.00275631	0.00588729
HAUS6	0.450046	0.000677993	0.00175138
FXR2	0.450116	0.0006286	0.00164063
ETHE1	0.450125	0.00119868	0.0028709
LOC100130776	0.45076	0.000300789	0.00086452
TBC1D24	0.450775	8.5448e-07	5.21412e-06
ZSCAN30	0.450858	0.00226642	0.00497988
MAP3K11	0.450872	0.000258481	0.000760625
GTPBP10	0.450898	0.000805453	0.00203761
CASKIN2	0.451095	6.67028e-06	3.13491e-05
AP1G2	0.451241	0.00412772	0.0083725
DDX28	0.451571	0.000199441	0.000607797
ERCC4	0.451578	0.000104925	0.000346634
ZNF559	0.451612	0.00358341	0.00741084
PPAT	0.451614	0.000686217	0.00176914
TOM1	0.45176	0.00149923	0.00347501
DNASE1	0.451823	3.46966e-08	3.20045e-07
MGAT2	0.451917	0.00338783	0.00706667
YAP1	0.451974	0.00130748	0.00309693
F2RL1	0.452094	4.3068e-07	2.85861e-06
LOC150568	0.452216	7.52677e-06	3.47628e-05
FBN1	0.452354	0.000305258	0.000875636
NR2C2	0.452606	0.000940545	0.00233071
POLR3E	0.452884	0.0014755	0.00342852
WDR83	0.45295	0.00284058	0.00604459
RAB8B	0.453021	0.000542795	0.00144403
ZNF174	0.45305	5.59067e-05	0.000200703
PARD3B	0.453147	0.000755983	0.00192511
GFOD2	0.453158	0.00081092	0.00204985
LOC386758	0.453177	0.00109648	0.00265973
DDA1	0.453338	0.00417952	0.00846314
OSBPL5	0.453515	7.01426e-06	3.27307e-05
SARM1	0.453697	6.04379e-06	2.87036e-05
NOS1AP	0.453746	7.28274e-05	0.000253117
ATP6V1A	0.453837	0.00314517	0.00660471
ARMC7	0.453947	1.41198e-06	8.08812e-06
CCPG1	0.454056	1.09874e-05	4.80502e-05
LYNX1	0.454162	0.000153679	0.000482838
PRKD3	0.454221	0.000201031	0.000611929
ZNF384	0.454417	0.000766982	0.00194895
SLMO1	0.454436	1.03244e-05	4.5608e-05
ZNF568	0.454441	0.00095839	0.00236731
RRN3P1	0.454577	1.23886e-05	5.32876e-05
PPP1R21	0.454803	1.03626e-05	4.57302e-05
TRMT6	0.454937	0.00142438	0.00333399
BRCC3	0.454975	0.00160011	0.00368536
TMEM41A	0.455301	0.000750174	0.00191143
TMEM135	0.455314	0.000190505	0.000584921
MUDENG	0.455322	0.00195523	0.00438144
POLM	0.455504	0.000872378	0.00218036
STAG3L1	0.455548	4.37432e-06	2.16549e-05
SAMD9	0.455596	0.000781601	0.00198263
C1D	0.455627	0.00376391	0.00772676
ZNF254	0.455805	0.000825815	0.00208067
LOC100130890	0.45609	2.92145e-06	1.52711e-05
DARS2	0.456381	0.000173369	0.000538114
TMEM194A	0.456588	0.000742231	0.0018934
RIN1	0.456802	0.000256983	0.000757066
ADCY3	0.457137	6.32986e-05	0.000223742
CLEC16A	0.457152	0.00322085	0.00675171
ZDHHC13	0.457615	0.00048559	0.0013113
LACTB	0.457646	8.73668e-06	3.95007e-05
FBXO8	0.457724	0.000416868	0.0011475
FAM58A	0.457855	6.35586e-05	0.000224479
DCAF4	0.457961	1.5752e-06	8.86789e-06
LZTS2	0.458191	0.000245192	0.000727406
NCAPD2	0.458654	0.000798778	0.00202307
APOL6	0.458932	2.13746e-05	8.5925e-05
DPY19L4	0.459112	8.59748e-05	0.000292216
ARID1B	0.459194	0.00144933	0.00337911
CMPK2	0.459366	2.42957e-06	1.3017e-05
CAPN10	0.45949	1.8272e-06	1.01168e-05
NCOA2	0.459685	0.000200639	0.000611021
ANKRA2	0.459705	0.00201053	0.00448158
KLHL20	0.460199	0.00198103	0.00442714
PPFIA3	0.460231	1.29735e-07	1.01258e-06
SSC5D	0.460513	1.78004e-07	1.32833e-06
ZNF333	0.460559	0.00132758	0.00313716
PIP5K1C	0.461055	0.0011078	0.00268221
RNPEPL1	0.461063	0.00016848	0.000523436
RNF139	0.461124	0.00214275	0.00473998
ZNF687	0.461133	7.23613e-05	0.000251965
ADRBK1	0.461625	2.63727e-05	0.000103258
SEPT4	0.46172	1.90187e-05	7.75984e-05
IQCB1	0.461745	0.00368177	0.00758192
PRKX	0.462239	3.31839e-05	0.000125569
MFSD6	0.462276	1.26895e-05	5.44389e-05
KAZN	0.46239	0.000617488	0.00161646
TMPO	0.462582	5.57176e-05	0.000200244
HTT	0.46261	0.00201894	0.00449651
WWP2	0.462933	0.000355201	0.000995764
KIAA1279	0.463203	0.000901344	0.00224163
DOLK	0.463367	0.000656779	0.00170331
MAN2B1	0.463722	0.00047778	0.00129315
NEDD4L	0.464002	0.00196581	0.00439987
STK35	0.464087	0.00062133	0.00162522
FZD1	0.464454	0.000628493	0.00164068
TMEM104	0.464655	0.000208669	0.000632091
ZNF26	0.464914	0.00369584	0.0076061
PACRG	0.465075	3.0577e-05	0.000117574
TRIM21	0.465367	0.000241943	0.000719561
INVS	0.465447	1.88447e-05	7.70567e-05
DNAJC4	0.465448	0.00117688	0.0028249
WDR53	0.465594	2.0732e-05	8.35985e-05
BPNT1	0.465613	2.05489e-05	8.30393e-05
PDPK1	0.465658	0.000980421	0.00241307
ATXN1L	0.465862	3.80725e-05	0.000142015
VPS37B	0.465931	9.87926e-05	0.000328614
NPRL2	0.465962	0.00293526	0.00621878
GATAD2B	0.465993	0.000227439	0.000681223
C15orf40	0.465994	0.0028012	0.0059744
DNAJB12	0.466152	0.000330139	0.000934513
URI1	0.466167	3.24006e-05	0.000123103
NSMAF	0.466184	0.00128861	0.00305776
CD58	0.466487	0.00196445	0.00439758
KPTN	0.4666	2.18579e-05	8.75186e-05
TMEM121	0.466712	2.58145e-05	0.000101315
INPP5K	0.466753	0.000318493	0.000906449
FRS2	0.46695	0.00063706	0.00165973
MCAT	0.467312	0.00026994	0.000789906
KIFC2	0.467394	0.000421953	0.00115931
FAM182B	0.467436	6.59972e-12	1.57923e-10
USP3	0.467601	0.00174049	0.00396817
KIF13B	0.467784	0.000438705	0.00119979
PHF14	0.467945	0.00377163	0.00773897
NDE1	0.467987	5.23363e-05	0.00018913
TMEM19	0.468021	5.76008e-05	0.00020605
CYB5R2	0.468119	1.54374e-06	8.72078e-06
ZNF193	0.46821	2.06854e-05	8.34366e-05
WDR4	0.468219	0.000216437	0.000652302
FBXO18	0.468318	0.00347859	0.00722374
CAB39	0.468426	0.000640365	0.00166734
CAPRIN2	0.468596	0.00153141	0.00354021
SFMBT1	0.468601	0.000599489	0.00157406
RHOBTB2	0.468669	5.85343e-05	0.000209104
CXCL16	0.4688	0.00459167	0.00918264
ITGA2	0.468818	0.000177568	0.000548934
XXYLT1	0.468883	3.36164e-05	0.000126949
C9orf40	0.469035	2.10276e-05	8.46862e-05
SIAH1	0.469062	0.00290419	0.00615694
RANGAP1	0.469275	0.00138169	0.00324568
FAM134B	0.469458	0.000441048	0.00120519
PCBD2	0.470131	5.11926e-06	2.4817e-05
LZTS1	0.470136	0.00310998	0.00654762
RASA1	0.47027	0.000758828	0.00193123
RPL23AP7	0.470308	0.000227298	0.000680958
PACSIN2	0.470346	8.76006e-05	0.000296971
MTCP1NB	0.470406	0.000632459	0.00164905
NCKIPSD	0.470923	0.00240889	0.00524624
NPL	0.471028	0.000483811	0.00130758
MTR	0.471602	0.00254674	0.00549617
THADA	0.471677	0.000354164	0.000993709
KLHL24	0.471762	0.00144513	0.00337112
NSUN7	0.471859	1.00747e-05	4.46402e-05
PRICKLE2	0.472034	0.000289872	0.000839038
NPTN	0.472078	8.53067e-06	3.87298e-05
MAP2K5	0.472124	0.000824618	0.00207846
RELL1	0.472127	8.62928e-05	0.000293145
ANKRD13A	0.472131	0.00366876	0.00755869
UTP18	0.472206	0.00122901	0.00293122
TUBGCP4	0.472324	0.000851003	0.00213591
MMD	0.472331	0.000121897	0.000396399
C17orf70	0.472454	0.000216537	0.000652452
USP28	0.472466	3.1798e-05	0.000121272
PHACTR2	0.472625	1.82582e-06	1.01135e-05
NF2	0.472904	0.00110007	0.00266743
RPAP2	0.473019	0.000383002	0.0010639
ZC3H18	0.47304	0.000547451	0.00145406
HELZ	0.473062	0.00155055	0.00358192
LACE1	0.473109	1.7765e-05	7.31906e-05
GALNT10	0.47313	0.0020108	0.00448142
OXSR1	0.473225	0.00147706	0.00343092
ALG14	0.473316	0.00156131	0.00360614
DNTTIP1	0.47357	0.00376937	0.00773555
ATXN7L2	0.473874	0.000121067	0.00039419
FAM18B1	0.473964	0.00339498	0.00707594
NEDD4	0.474069	9.60583e-07	5.76746e-06
DDX58	0.474187	0.000523258	0.0014006
PSORS1C1	0.474388	2.50919e-07	1.80356e-06
C16orf58	0.47442	0.00370085	0.00761402
RAPGEF1	0.474459	3.85892e-05	0.00014386
KIAA1009	0.474574	0.000327852	0.000929445
FBXO31	0.474598	0.000709192	0.00181763
C20orf27	0.474741	0.00216768	0.00478866
PDIA5	0.474766	4.30869e-05	0.00015815
ANP32A	0.474795	3.92987e-05	0.000146131
NDOR1	0.474994	0.00252108	0.00544978
SMAD5	0.475059	0.00312851	0.006575
SRR	0.475178	0.000854446	0.00214168
PRR14	0.475396	0.00015967	0.000499024
SLC37A4	0.475456	0.000813082	0.00205452
NAGLU	0.475572	9.88802e-05	0.000328822
PLA2G15	0.475623	0.00143297	0.0033517
DGCR6	0.475669	8.18727e-05	0.000279946
PBX3	0.475899	0.000635018	0.00165474
DLG2	0.475983	0.000253923	0.000749571
ZNF326	0.475991	0.00111106	0.00268909
EHD3	0.476119	1.28053e-05	5.48818e-05
POLR3H	0.476255	0.00298638	0.00631481
DISP2	0.476565	0.000376017	0.00104695
ERI2	0.476607	6.22514e-06	2.94367e-05
CHSY1	0.47687	4.5381e-05	0.000165827
FAM155A	0.476881	6.78449e-09	7.75565e-08
SNAPC2	0.476932	0.00060796	0.00159439
ZNF385D	0.47701	3.00604e-05	0.00011586
FDXR	0.477022	1.57401e-07	1.19781e-06
LINC00526	0.477052	0.000137952	0.000441805
USP30	0.477057	0.000150595	0.000474973
CNIH2	0.477081	9.29981e-08	7.61735e-07
UBQLN4	0.477089	2.62074e-06	1.38486e-05
FXN	0.477232	0.00112738	0.00272307
ABHD10	0.477251	0.000340384	0.000960399
RAB23	0.477341	2.62413e-05	0.000102805
KAT5	0.477453	0.00280258	0.00597638
MAP4K3	0.477771	0.0020739	0.00460401
KCNJ8	0.477801	2.65964e-08	2.56726e-07
KIAA1468	0.477874	1.34391e-05	5.73539e-05
PATZ1	0.477917	0.000165692	0.000515632
SETD2	0.477919	0.00271797	0.00581583
AKAP8	0.477962	0.00495224	0.00980634
ZDHHC3	0.478147	0.00442632	0.00889546
DCBLD1	0.478175	3.17252e-06	1.63807e-05
ZC3H3	0.478317	1.03589e-05	4.57295e-05
LY6H	0.478336	2.50006e-05	9.84752e-05
CLCN6	0.478423	0.00239757	0.00522682
SERTAD3	0.478525	0.00258804	0.00557519
PRKAG1	0.478658	0.00465911	0.00929479
C14orf167	0.478711	0.00025349	0.000748463
MFGE8	0.478921	5.64475e-06	2.70341e-05
CEP104	0.479181	8.37004e-05	0.000285449
BTBD17	0.479197	0.00301319	0.00636534
OPTN	0.479469	0.00143245	0.0033511
LETM1	0.479639	0.00420152	0.00850375
BLMH	0.479642	0.00185281	0.00418778
SMAP2	0.480118	0.00162116	0.00372531
FER	0.480478	0.000544241	0.001447
NAPRT1	0.480546	0.000690916	0.0017781
GCC1	0.480868	0.00138109	0.00324485
TCF3	0.481313	0.00407287	0.00827664
C12orf66	0.481446	0.000625524	0.00163456
FAM208B	0.481588	0.000322806	0.000917126
PDS5B	0.481646	0.000313297	0.000894382
TMEM39A	0.481702	0.000902723	0.00224421
PIGK	0.481709	0.000124711	0.000404144
ZNF626	0.481895	8.35758e-05	0.000285099
MYO18A	0.482224	5.73189e-05	0.00020521
HSF2	0.48236	0.00163393	0.0037494
FANCG	0.482397	0.000342601	0.000965404
TMEM186	0.482563	0.000277682	0.000807863
SGSM3	0.482698	0.00127202	0.00302333
DOLPP1	0.482902	0.000714038	0.0018279
RALGPS1	0.482936	0.000662698	0.0017156
REST	0.483001	0.00148767	0.00345312
NOTCH3	0.483362	0.000101381	0.000336197
SCAMP2	0.483448	0.00116886	0.00280925
PSKH1	0.483518	0.000278714	0.000810687
IRF3	0.483638	0.000211189	0.000638544
FBXO5	0.483701	0.00012232	0.00039738
C3orf78	0.484123	4.77935e-05	0.000173769
CNNM3	0.484136	0.000310915	0.000888746
C6orf47	0.484162	0.000268097	0.000785565
HYOU1	0.4845	0.00392314	0.00800717
RAB3IP	0.484548	0.00306089	0.00645361
RFWD2	0.484723	0.00358866	0.00741702
ZNF528	0.484864	0.000309101	0.000884525
KIAA0240	0.484946	2.04878e-05	8.28694e-05
C19orf29	0.485101	0.000105353	0.000347959
SPTLC2	0.485318	7.9041e-06	3.63006e-05
CDC7	0.485572	0.000299443	0.000861409
SOS2	0.485604	0.000247227	0.000732614
SLC38A7	0.485648	7.91979e-05	0.000271936
CCNT2	0.485648	0.000437361	0.00119737
ADAM23	0.485686	1.2659e-05	5.43435e-05
CLN8	0.486058	0.00027971	0.000813222
ST20	0.486085	8.72231e-05	0.000295768
HERC6	0.486135	0.000185472	0.000570806
ASB3	0.486526	2.37883e-06	1.27766e-05
ANKRD52	0.486663	0.00216123	0.00477522
IRF2	0.486674	0.0036198	0.0074684
TXLNG	0.486772	0.0045225	0.00905677
TDP2	0.486906	0.000136183	0.000436673
ERCC2	0.487055	0.000116055	0.000379856
FAM108B1	0.487407	0.00018583	0.000571774
UBE2R2	0.487522	0.00266786	0.00572265
ATL2	0.487639	7.78142e-06	3.57874e-05
MYO5A	0.487669	0.00251544	0.00543938
POC1B	0.487887	0.00184497	0.00417366
FMNL3	0.487977	0.00192641	0.00432575
UPF3B	0.488077	0.00334039	0.00697549
NBAS	0.488092	0.00319852	0.00670813
RBM41	0.488199	8.93033e-05	0.000301961
TMEM184C	0.488239	0.00132642	0.00313498
MOSPD2	0.488576	0.000378743	0.00105431
ZNF577	0.488668	5.42393e-06	2.60911e-05
FGFR2	0.488675	0.000381723	0.00106148
RPS6KC1	0.488973	0.000697126	0.00179021
ZNF584	0.489246	3.47252e-05	0.000130684
CTNS	0.489246	0.000123293	0.000400044
MAN2B2	0.489312	6.1932e-05	0.000219623
FUT9	0.489438	7.30837e-06	3.38977e-05
DNAJC30	0.489526	0.00102814	0.00251726
LMNB2	0.489652	0.000649917	0.00168953
DTNB	0.489678	1.5753e-05	6.60445e-05
DENND4B	0.48987	0.00303953	0.00641477
HSD3B7	0.490046	0.00127783	0.00303658
TRAF5	0.490218	0.000349057	0.000981272
BTN3A3	0.490255	7.92995e-07	4.88447e-06
TRMT5	0.490423	0.000298435	0.000858697
AATF	0.490562	0.00103529	0.00253429
ZNF273	0.490615	0.000394087	0.00109215
WDR49	0.490633	4.93906e-06	2.40593e-05
L3MBTL4	0.490717	7.44077e-06	3.44264e-05
ZNF337	0.490733	0.00287375	0.00610031
WNK3	0.490771	0.00189835	0.00427374
DDX59	0.490962	0.000251899	0.000744604
C5orf4	0.490997	3.13476e-05	0.000120008
TTC3P1	0.491154	0.00118217	0.00283552
ZFP3	0.491582	6.06204e-05	0.00021538
DBR1	0.491754	7.18958e-05	0.000250611
CCDC144C	0.491796	2.02825e-05	8.2115e-05
FKTN	0.491963	5.38185e-06	2.59268e-05
SIRT5	0.491999	0.000987934	0.00242883
UTP14A	0.492005	1.62595e-05	6.7799e-05
ZNF264	0.492509	0.000496636	0.001337
SART1	0.492613	0.00139343	0.00326681
TBC1D7	0.492703	0.00046663	0.00126532
SREBF2	0.492984	0.000101077	0.000335359
NRSN1	0.492989	2.87567e-06	1.50619e-05
ANKRD9	0.493126	9.41769e-05	0.000315668
CC2D1A	0.493509	0.000197159	0.000602384
DPY19L2P1	0.493539	7.60779e-05	0.000262879
PRR7	0.493703	0.000195724	0.000598698
MIAT	0.49373	0.000217377	0.00065423
KHSRP	0.493773	4.10348e-08	3.69906e-07
AFG3L1P	0.493865	0.000503582	0.00135374
ZNF746	0.494137	0.000578083	0.00152367
WIZ	0.494267	0.000885966	0.00220884
RXRA	0.494664	7.67877e-06	3.53401e-05
CHCHD4	0.494849	2.47824e-05	9.77627e-05
POLR1E	0.494886	0.00284245	0.00604661
HSD17B6	0.494924	4.12616e-06	2.06135e-05
MN1	0.495147	2.57661e-08	2.49632e-07
DDX10	0.495238	0.000365723	0.00102198
ABHD5	0.495249	0.00331578	0.00692741
AMIGO2	0.495255	5.06817e-06	2.45876e-05
C7orf26	0.495377	9.59344e-05	0.000320573
ZNF318	0.495533	0.000543001	0.00144429
RARG	0.495637	5.267e-06	2.54203e-05
MLYCD	0.495692	5.24495e-07	3.39186e-06
TMEM189	0.495798	2.18887e-05	8.76149e-05
DSCR3	0.495842	0.00124165	0.00295758
STK38L	0.495953	0.00319884	0.00670773
WDR75	0.496212	0.00197794	0.00442174
ZC3H7A	0.496231	0.00186002	0.00420044
CNOT6	0.496379	2.3866e-05	9.45181e-05
GRAMD4	0.496404	3.74214e-06	1.89261e-05
GNG10	0.496502	0.00435095	0.00876956
WASF3	0.496542	0.00121342	0.00290143
TMEM38A	0.497245	1.86936e-05	7.65104e-05
RNF113A	0.497268	1.94562e-05	7.92106e-05
FAM48A	0.49728	0.000817678	0.00206414
INO80D	0.497368	0.00147483	0.00342818
TST	0.497462	0.000197719	0.000603672
KLHL28	0.497464	4.22063e-05	0.000155398
PARVA	0.497884	2.97023e-05	0.000114615
SPRYD4	0.497906	3.07989e-05	0.000118288
SMG7	0.497998	0.00503098	0.00993819
TATDN3	0.498131	0.00143336	0.00335202
MYOM2	0.498872	2.01251e-06	1.10171e-05
SLC4A8	0.499242	0.000166416	0.000517513
E4F1	0.499322	0.0024092	0.00524517
CBFA2T2	0.499413	0.0011599	0.00279027
[truncated: 4,633 more rows]

## Sheet: DE analysis - Tissues
Genes differentially expressed (DE) between GBM tissues with low and high tumorigenic scores (TumLOW and TumHIGH respectively)
Fold change = mean expression across TumHIGH tissues (in log2(CPM+1)) - mean expression across TumLOW tissues (in log2(CPM+1))
Gene	Fold Change = mean(TumHIGH tissues) - mean(TumLOW tissues)	Mann-Whitney p-value	Benjamini-Hochberg adjusted p-value
IGJ	-4.22233	8.09127e-09	2.15148e-07
DKK1	-3.61984	2.06812e-09	7.26001e-08
ADAM6	-3.56776	3.31116e-09	1.06066e-07
CXCL6	-3.39708	5.34035e-07	6.62727e-06
F13A1	-3.38315	7.65607e-09	2.0571e-07
CCL18	-3.33156	1.31457e-05	9.37066e-05
FAM176A	-3.3176	4.26154e-14	2.08014e-11
IL2RA	-3.23133	4.08563e-06	3.55969e-05
SAA2	-3.22594	0.000137448	0.000687944
MARCO	-3.199	6.26495e-05	0.000352948
CCL7	-3.16403	2.50639e-07	3.52666e-06
SAA1	-3.15704	0.00015524	0.000763574
SLPI	-3.13682	2.82842e-08	5.85712e-07
MMP7	-3.11093	2.98375e-06	2.71504e-05
PI3	-3.07253	0.000381343	0.00163179
MME	-2.96769	5.13916e-08	9.52603e-07
TFPI2	-2.93506	1.46781e-07	2.23397e-06
CCL20	-2.85302	4.73399e-07	6.01684e-06
AKR1B10	-2.85265	3.58133e-11	3.24871e-09
LYVE1	-2.84505	6.50798e-07	7.78414e-06
KIAA0408	-2.82507	0.000132683	0.000668667
MMP1	-2.8089	3.86379e-06	3.39672e-05
FAM81B	-2.80256	4.98168e-06	4.1822e-05
SFRP2	-2.80133	8.78732e-07	9.90917e-06
C19orf59	-2.79397	1.90282e-06	1.87457e-05
WDR69	-2.78949	2.56449e-06	2.39848e-05
CR1	-2.77269	1.00033e-05	7.43303e-05
S100A8	-2.76559	4.74136e-10	2.28712e-08
FOLR2	-2.72919	1.65497e-11	1.85402e-09
TREM1	-2.70591	5.25075e-09	1.49094e-07
FABP4	-2.70158	2.25209e-07	3.2332e-06
CCL8	-2.66509	4.72146e-11	4.04999e-09
CXCL13	-2.66067	3.43513e-05	0.000210471
MRC1	-2.65919	1.40722e-06	1.47266e-05
FCGR2B	-2.64916	6.48279e-08	1.14473e-06
C11orf88	-2.6408	3.8049e-07	4.98111e-06
MSLN	-2.62512	3.35718e-05	0.000207181
CYP1B1	-2.61757	1.62842e-09	6.02605e-08
LBP	-2.60464	2.63326e-05	0.000169923
CSF3	-2.60082	6.32384e-05	0.000353835
IL10	-2.58622	2.00949e-11	2.0912e-09
CLUL1	-2.56633	4.17965e-06	3.59878e-05
FAM183A	-2.56175	2.9221e-05	0.000185238
IL6	-2.55661	1.34894e-07	2.09346e-06
NNMT	-2.55234	3.57799e-09	1.12676e-07
S100A9	-2.52887	1.50287e-09	5.63262e-08
ARMC3	-2.50774	0.000255677	0.00116507
TNFSF12.TNFSF13	-2.48588	5.10239e-10	2.4555e-08
IBSP	-2.48527	1.70421e-05	0.000116927
F5	-2.48473	5.10095e-07	6.396e-06
COL6A3	-2.46998	9.89595e-07	1.09663e-05
AQP9	-2.46341	4.24068e-07	5.49894e-06
CD3D	-2.46307	2.5232e-08	5.36042e-07
CD70	-2.45818	5.18654e-06	4.31531e-05
IL21R	-2.44501	3.49072e-08	6.94114e-07
FPR2	-2.43553	1.48592e-08	3.49344e-07
LY96	-2.43133	5.66342e-17	2.32212e-13
TDO2	-2.42926	9.69893e-08	1.59581e-06
ROPN1L	-2.4223	1.24657e-07	1.97039e-06
GZMK	-2.41565	4.17458e-09	1.25305e-07
CAMP	-2.41341	5.018e-05	0.000290031
IL8	-2.41167	6.01563e-06	4.87649e-05
HAMP	-2.40162	2.00518e-10	1.16785e-08
SPINK1	-2.39956	7.20144e-07	8.48975e-06
C9orf24	-2.39571	1.03648e-07	1.70127e-06
C11orf70	-2.38632	3.74577e-07	4.93839e-06
SLC38A4	-2.37131	7.63608e-06	5.93656e-05
LILRA5	-2.36887	2.28705e-08	4.96157e-07
AKAP14	-2.3651	0.000126033	0.000639554
AFP	-2.36293	6.39579e-06	5.11588e-05
MMP3	-2.33712	2.85298e-06	2.61344e-05
FAM92B	-2.33582	1.72787e-05	0.000118077
GZMA	-2.33026	4.35655e-10	2.18906e-08
SAA4	-2.32965	2.15939e-05	0.000143453
DPT	-2.32378	6.37984e-07	7.67565e-06
MGP	-2.31871	4.72146e-11	3.99978e-09
CCL13	-2.31312	2.22123e-05	0.000146188
SPAG17	-2.30998	6.2424e-06	5.02653e-05
IGFBP6	-2.28291	5.18181e-11	4.28356e-09
TSPAN8	-2.27141	1.20894e-05	8.68412e-05
RARRES1	-2.2631	2.56932e-07	3.59057e-06
ENPP5	-2.25927	9.68768e-06	7.25108e-05
UBXN10	-2.25921	2.8863e-05	0.000183082
CCL2	-2.246	1.26334e-07	1.99536e-06
CLCA2	-2.24556	5.91739e-07	7.18676e-06
C7	-2.24321	1.25529e-05	9.00763e-05
ABI3BP	-2.23791	1.77311e-06	1.78364e-05
FCN3	-2.23179	1.26334e-07	1.9877e-06
C15orf48	-2.23148	3.03459e-08	6.25248e-07
MGST1	-2.22242	5.21263e-13	1.3358e-10
TIMD4	-2.21499	4.84038e-08	9.14586e-07
CCL3	-2.2115	5.10095e-07	6.41168e-06
CAPSL	-2.20822	0.000826457	0.00315869
ROR2	-2.20361	4.24068e-07	5.46438e-06
KRT16	-2.20149	6.02696e-05	0.000340007
C4BPA	-2.19974	1.13296e-05	8.20156e-05
ALPK2	-2.19943	1.67401e-06	1.70402e-05
PDZK1IP1	-2.18824	9.55102e-06	7.16449e-05
SKAP1	-2.18621	3.17166e-08	6.44423e-07
CEACAM4	-2.17837	1.02443e-06	1.12792e-05
MGC29506	-2.1739	1.13128e-05	8.26825e-05
ANXA13	-2.16949	1.62558e-09	6.05928e-08
MMP10	-2.16874	2.18883e-07	3.14459e-06
TRIM29	-2.15475	3.22069e-05	0.000200813
TACR1	-2.15281	8.72418e-06	6.612e-05
SPAG4	-2.1481	3.8653e-09	1.18804e-07
WNT2	-2.13936	4.69281e-05	0.000275271
C5orf46	-2.13928	2.38154e-06	2.25203e-05
CFD	-2.13608	1.83658e-10	1.11067e-08
PKP2	-2.13256	8.3085e-06	6.33914e-05
SLN	-2.13068	0.000347371	0.00151166
ANKRD5	-2.1286	1.34894e-07	2.10621e-06
KLRB1	-2.12481	7.94327e-06	6.1289e-05
HP	-2.12155	0.000162158	0.000793413
GOLT1A	-2.11854	0.000121388	0.000620593
POPDC3	-2.1179	4.4968e-06	3.83481e-05
MS4A4A	-2.11701	2.4361e-11	2.43622e-09
STOML3	-2.10657	0.00244898	0.00795289
CXCL5	-2.10601	0.0013371	0.00475241
SHISA2	-2.09741	5.05189e-05	0.000291908
EREG	-2.09679	0.000165592	0.000807326
AREG	-2.09228	0.000244777	0.00112188
GALNT5	-2.09206	2.41754e-05	0.00015769
ASGR2	-2.09191	1.40837e-10	9.07957e-09
LUM	-2.08866	2.41118e-07	3.40908e-06
MAT1A	-2.08695	1.0687e-07	1.72923e-06
MCTP2	-2.0836	3.2431e-05	0.000201171
BCL2A1	-2.08331	6.63163e-10	3.03471e-08
DAPL1	-2.08286	0.000193003	0.000916765
RNASE1	-2.07824	3.57799e-09	1.12159e-07
TSPAN1	-2.07604	2.4361e-11	2.4244e-09
SNX10	-2.07351	1.91026e-09	6.77548e-08
CD163	-2.06788	2.22784e-06	2.14125e-05
MFAP5	-2.06352	0.000274709	0.00123613
AZGP1	-2.0503	2.80195e-05	0.000179005
PTGFR	-2.04693	3.08167e-05	0.000193796
CXCR6	-2.04666	3.64418e-07	4.81374e-06
AKR1C1	-2.04197	4.24068e-07	5.50242e-06
RNASE2	-2.03844	5.18181e-11	4.23236e-09
VSIG4	-2.03675	1.07673e-10	7.28516e-09
CD52	-2.03418	1.62842e-09	6.04788e-08
CLEC10A	-2.03262	3.57248e-05	0.000218104
SELM	-2.02859	2.1644e-12	3.89232e-10
RNASE3	-2.02403	6.58905e-09	1.79631e-07
TSPAN2	-2.01802	1.44004e-07	2.19496e-06
CP	-2.0175	8.78732e-07	1.00027e-05
ZBBX	-2.01692	5.88336e-05	0.000333466
RMRP	-2.01676	2.73728e-07	3.78147e-06
CCDC33	-2.01644	0.00032581	0.00143305
MET	-2.01562	2.3008e-05	0.000150892
UPK3A	-2.01505	4.28013e-05	0.000254191
SCN9A	-2.00837	3.2431e-05	0.000200745
MIPOL1	-2.00691	6.4207e-06	5.1338e-05
RHOD	-2.00073	7.9394e-05	0.000430597
CCL26	-1.99669	4.96396e-08	9.20961e-07
COL10A1	-1.99583	5.23994e-07	6.50661e-06
TREML3	-1.99307	1.68926e-06	1.70096e-05
C13orf30	-1.98983	7.34521e-05	0.000403278
RHCE	-1.98859	2.63905e-06	2.44922e-05
AMICA1	-1.98843	1.32762e-06	1.41097e-05
SLAMF9	-1.98836	0.000197049	0.000935333
PPBP	-1.98657	0.000105193	0.00055141
KRT17	-1.98304	1.65272e-05	0.000113661
CXCL14	-1.98267	3.74868e-05	0.000227036
SEMA3C	-1.98067	6.48279e-08	1.1408e-06
IL1R1	-1.97804	3.74577e-07	4.91941e-06
KMO	-1.97773	2.42204e-09	8.20731e-08
GIPC2	-1.97341	2.62003e-09	8.79104e-08
CYP11A1	-1.97087	4.74549e-05	0.000278202
CATSPER1	-1.97063	1.52052e-06	1.56252e-05
PLA2R1	-1.96979	2.79138e-06	2.57196e-05
DYDC2	-1.96771	0.00018523	0.000884352
MOG	-1.96074	0.00257667	0.00831355
TMEM150B	-1.95938	5.43892e-06	4.46728e-05
CD8B	-1.95539	4.60645e-08	8.77666e-07
XCL2	-1.95304	1.26075e-09	4.94198e-08
EMR1	-1.95291	1.86641e-07	2.73897e-06
CLEC12A	-1.94914	8.78732e-07	1.00083e-05
CSTA	-1.94767	9.83872e-11	6.79137e-09
CCR2	-1.94728	6.1252e-07	7.42156e-06
BMP5	-1.94721	0.000680746	0.00268642
SERPINB2	-1.94521	1.82214e-05	0.000123205
COL13A1	-1.94486	0.000843836	0.00320598
CHIT1	-1.93933	4.3273e-05	0.00025677
IL1R2	-1.93782	0.000171595	0.000829101
AKR1C2	-1.93674	1.32762e-06	1.4117e-05
CPXM2	-1.93381	8.69772e-05	0.000467152
OTOS	-1.93345	0.000270761	0.00122078
TMEM200A	-1.93302	2.95199e-06	2.68972e-05
MT1H	-1.93174	1.88003e-05	0.000127077
OGN	-1.92949	0.000192792	0.000917886
VNN2	-1.92776	9.57114e-09	2.46815e-07
S100A4	-1.92637	1.824e-11	1.94759e-09
C3orf66	-1.92577	1.80949e-05	0.00012239
LRP2	-1.92355	0.000136095	0.000684013
CPA3	-1.92248	3.22163e-05	0.000200811
CELA1	-1.91839	1.65677e-06	1.68731e-05
CCL3L1	-1.91772	0.000333589	0.0014585
MLPH	-1.91742	0.000171026	0.000827129
TLR8	-1.91437	4.01177e-08	7.781e-07
CLDN11	-1.91335	1.19228e-05	8.60969e-05
RGS2	-1.91198	4.74136e-10	2.29252e-08
CRTAM	-1.89609	2.5232e-08	5.35487e-07
C9orf44	-1.89607	0.000285969	0.00128117
HTR2B	-1.89576	2.39353e-06	2.26232e-05
CCL14	-1.8954	5.06042e-06	4.24657e-05
KCNK15	-1.89435	3.17509e-07	4.27677e-06
WDR63	-1.88851	0.000419103	0.00177411
EGFL6	-1.88798	3.70592e-06	3.25933e-05
LYZ	-1.87833	5.76385e-07	7.042e-06
EVI2A	-1.87515	6.11036e-09	1.70898e-07
HK3	-1.86876	7.79713e-07	9.02591e-06
CD200R1	-1.86545	6.05722e-08	1.08548e-06
HBB	-1.86428	0.000113971	0.000590625
TNNT1	-1.85485	0.000387526	0.0016579
KRT7	-1.85236	6.69517e-06	5.32419e-05
IL15	-1.85012	1.17795e-10	7.94377e-09
GATA6	-1.84688	0.000349056	0.00151739
CCL4	-1.84599	4.11471e-06	3.58046e-05
CPA4	-1.84526	5.40151e-06	4.476e-05
CHI3L1	-1.84307	0.000610093	0.00245053
THBS1	-1.83818	6.6041e-05	0.00036751
C15orf26	-1.83537	0.000419103	0.00177448
FPR1	-1.83511	6.83516e-11	5.30787e-09
STEAP1	-1.83258	3.98594e-07	5.1982e-06
PTGDS	-1.83068	2.08302e-05	0.000138514
CTHRC1	-1.82909	3.29978e-06	2.96575e-05
TCTEX1D1	-1.82898	1.13225e-05	8.2022e-05
VAMP8	-1.82848	2.97045e-12	4.99157e-10
C2orf62	-1.82516	4.16506e-06	3.58773e-05
STEAP4	-1.82499	1.02062e-05	7.53192e-05
GSDMC	-1.82442	1.7489e-06	1.76015e-05
C6orf105	-1.8234	6.40898e-07	7.70619e-06
TNFRSF8	-1.82249	1.10934e-08	2.77011e-07
TFAP2C	-1.82041	0.000192792	0.000916184
AIF1	-1.81981	3.7053e-13	1.02652e-10
IL18R1	-1.81803	1.18293e-07	1.88285e-06
KLRC1	-1.81785	2.34632e-06	2.23314e-05
MS4A6A	-1.80892	1.83658e-10	1.09772e-08
FAM177B	-1.80816	9.07394e-08	1.5124e-06
LRG1	-1.80661	1.38172e-08	3.29763e-07
CCL3L3	-1.80617	0.00128155	0.00458199
ENPP2	-1.80487	1.13225e-05	8.2547e-05
TMEM114	-1.80303	3.39987e-06	3.03707e-05
FAM20A	-1.8007	4.79729e-07	6.0672e-06
FAM23A	-1.79829	6.50798e-07	7.78868e-06
C1QA	-1.79535	4.30043e-11	3.81659e-09
P4HA3	-1.79071	3.8948e-06	3.4021e-05
RPL39L	-1.78888	2.18937e-05	0.000144369
TMIGD2	-1.7854	4.53805e-05	0.000266575
PI15	-1.78537	2.22784e-06	2.13027e-05
UBD	-1.78443	2.94234e-05	0.000185432
SAMD3	-1.78418	6.44662e-07	7.7469e-06
C1orf133	-1.78315	1.46366e-05	0.000102973
ISLR	-1.78253	4.24068e-07	5.47815e-06
C6orf142	-1.78232	0.000228718	0.00106013
CAPS	-1.77804	5.28459e-08	9.76031e-07
RCAN2	-1.7778	2.26233e-07	3.22531e-06
GPC3	-1.77217	3.12131e-06	2.83142e-05
GZMB	-1.77061	7.2185e-06	5.65266e-05
ABCA13	-1.76868	0.00246167	0.00799029
ACPP	-1.76706	8.27819e-07	9.52899e-06
CCL23	-1.76618	8.28904e-05	0.00044861
SLC16A10	-1.7657	9.32603e-07	1.04136e-05
RERG	-1.76511	1.99042e-07	2.89197e-06
SIT1	-1.76497	4.29932e-08	8.25284e-07
TFF3	-1.76361	0.000234915	0.00108346
SPAG6	-1.76028	5.95104e-07	7.22335e-06
RETN	-1.75808	0.000573768	0.00232191
MAP3K8	-1.75657	1.53919e-10	9.62043e-09
DSC2	-1.75579	1.18293e-07	1.88578e-06
CD2	-1.75405	2.91565e-07	4.00091e-06
LRRIQ1	-1.75043	0.000251865	0.00114897
AKR1C3	-1.75024	3.06341e-09	9.98457e-08
LOC647309	-1.74641	0.000658321	0.00261606
C6	-1.74355	9.04807e-05	0.000483941
OMD	-1.7416	0.000134813	0.000679067
FAM3B	-1.73908	3.83208e-05	0.000230995
HIST2H2AA3	-1.73855	2.18854e-10	1.25678e-08
BTBD11	-1.73831	2.95199e-06	2.70173e-05
TPBG	-1.73616	1.88469e-05	0.000126682
FAM180B	-1.73173	0.00167148	0.00577565
BATF	-1.73106	2.83344e-09	9.35401e-08
CXCL12	-1.73044	9.07394e-08	1.51486e-06
THEMIS	-1.73002	5.65835e-08	1.01845e-06
COL14A1	-1.72983	0.000969351	0.00362111
LILRB5	-1.72843	0.00163813	0.00566425
CTSH	-1.72652	8.98711e-11	6.33143e-09
CRYBB1	-1.7221	7.20647e-10	3.23991e-08
LINGO4	-1.71651	2.55263e-07	3.58926e-06
TACSTD2	-1.71335	1.49132e-06	1.53636e-05
CH25H	-1.71247	7.79713e-07	9.04123e-06
TSPAN19	-1.71157	4.00704e-06	3.4927e-05
GZMH	-1.70954	1.04988e-06	1.15284e-05
TEC	-1.70932	1.53697e-07	2.31177e-06
VSTM1	-1.70662	0.000903475	0.00339544
ENPP4	-1.70385	1.44004e-07	2.21306e-06
MSX2	-1.70251	3.8948e-06	3.40355e-05
GCNT1	-1.70222	1.53697e-07	2.33231e-06
LILRA3	-1.7013	0.000535516	0.00219134
FAM26F	-1.7011	3.74261e-08	7.38471e-07
HOXB6	-1.70082	0.00222766	0.00734943
ALOX15B	-1.69739	0.00174844	0.00599911
FAM150B	-1.69584	0.000171546	0.00082906
DYNLRB2	-1.69214	0.000226334	0.00105098
CD72	-1.69085	6.58905e-09	1.80833e-07
C2orf89	-1.69065	4.01177e-08	7.83288e-07
CYP7B1	-1.69	3.8948e-06	3.41228e-05
CCL5	-1.68895	7.10345e-09	1.92629e-07
PODNL1	-1.68264	4.53805e-05	0.00026711
CCL4L2	-1.67671	0.000333351	0.00146433
C5orf49	-1.67637	0.00116945	0.00424786
LAYN	-1.67623	3.87582e-15	2.9429e-12
RPSAP52	-1.67582	0.00277401	0.00884171
DNAH6	-1.67306	0.000130218	0.000658834
CLEC2B	-1.67282	2.06812e-09	7.27247e-08
LOC388588	-1.67195	4.46256e-06	3.80878e-05
ASS1	-1.67194	8.27699e-06	6.3792e-05
KCNE1	-1.67162	8.93234e-05	0.000478
LOC400804	-1.66985	0.000293031	0.00131224
DOK2	-1.66783	3.10502e-07	4.20449e-06
IL13RA2	-1.66564	0.00108528	0.00397167
FAM24B	-1.66307	4.98865e-05	0.000289888
LOX	-1.66292	3.12131e-06	2.82641e-05
PTGES	-1.66215	5.4228e-07	6.67303e-06
COPZ2	-1.66145	3.67467e-10	1.91204e-08
LOC100130933	-1.66116	0.00010469	0.000549053
TYROBP	-1.6607	4.98796e-12	7.63121e-10
CTLA4	-1.65759	5.70536e-06	4.64149e-05
GREM1	-1.6574	0.0024038	0.0078347
HOXB9	-1.65671	0.000728796	0.00283942
C4BPB	-1.65648	1.68192e-06	1.6944e-05
CXCL3	-1.65594	0.00187815	0.00636114
CD14	-1.65518	4.35655e-10	2.20527e-08
CD3E	-1.65222	4.60645e-08	8.78483e-07
ANGPTL5	-1.65072	7.33209e-07	8.6388e-06
CD8A	-1.64995	4.50742e-09	1.33536e-07
SPEF2	-1.64904	0.000248919	0.00113781
GLIPR1	-1.64864	1.501e-11	1.71911e-09
KLK10	-1.64789	1.9535e-06	1.92357e-05
CD27	-1.64735	8.88694e-09	2.34179e-07
JAK3	-1.64345	1.59759e-08	3.6759e-07
ANKRD1	-1.64266	6.83976e-06	5.39938e-05
PVRL4	-1.64023	1.09999e-06	1.20207e-05
FAP	-1.63922	9.10169e-05	0.000486174
ST18	-1.63894	0.00168668	0.00580177
XCL1	-1.63841	8.77017e-08	1.46893e-06
CFB	-1.638	2.53981e-05	0.000164983
ANXA3	-1.63571	0.000730724	0.00284639
C21orf130	-1.63566	6.68057e-05	0.000371463
PF4	-1.63534	2.24179e-05	0.000147494
OBFC2A	-1.63379	4.35655e-10	2.17838e-08
APOH	-1.63215	0.000246423	0.00112917
C3orf52	-1.62832	1.40722e-06	1.47718e-05
C1QB	-1.62591	3.56367e-11	3.32086e-09
CD48	-1.62333	6.48279e-08	1.1477e-06
IER3	-1.62244	4.00173e-10	2.04078e-08
LOC283050	-1.62008	3.67467e-10	1.90238e-08
HTATIP2	-1.61916	1.08721e-09	4.44886e-08
MEIG1	-1.61726	7.1648e-07	8.45141e-06
OSM	-1.61641	4.11471e-06	3.56382e-05
HLA.DRB6	-1.61458	0.000162158	0.000793792
SRGN	-1.61427	1.17795e-10	7.91772e-09
FCER1A	-1.61351	0.000717558	0.00279724
COL1A1	-1.61268	0.000541874	0.00221426
KYNU	-1.61166	2.60454e-10	1.43924e-08
MEI1	-1.61056	4.05954e-12	6.50192e-10
SLAMF6	-1.6081	8.78732e-07	9.90373e-06
LILRB2	-1.60707	5.11711e-06	4.28362e-05
CTSC	-1.60627	8.98711e-11	6.35326e-09
RPPH1	-1.60613	0.000148597	0.000736375
MORN5	-1.60578	0.000377058	0.00161886
FCN1	-1.60503	0.00280721	0.00894198
ACAP1	-1.60331	3.49072e-08	6.97497e-07
NOV	-1.60273	4.86554e-09	1.41487e-07
TRAM1L1	-1.60271	2.94234e-05	0.000185489
TTC39A	-1.60195	3.51939e-07	4.66091e-06
DUSP23	-1.60158	6.52644e-13	1.52044e-10
SPP1	-1.60143	1.04988e-06	1.14976e-05
RBP7	-1.59929	4.51084e-07	5.74747e-06
STC1	-1.59629	0.00040907	0.00173379
P2RY10	-1.59596	5.53752e-06	4.54463e-05
ENTHD1	-1.59494	5.65505e-05	0.000322308
FTL	-1.5896	2.94869e-11	2.83808e-09
DPYS	-1.58663	3.66736e-06	3.24631e-05
PSTPIP1	-1.58444	2.82842e-08	5.88088e-07
MS4A7	-1.58333	6.58905e-09	1.8011e-07
HLA.DRA	-1.58281	5.15858e-10	2.46518e-08
HMGCLL1	-1.58078	0.000713333	0.00279138
SH3BGR	-1.57979	1.58017e-06	1.61169e-05
NPC2	-1.57888	1.73086e-14	9.09854e-12
HBD	-1.57796	3.06492e-05	0.000192919
ORM1	-1.57666	0.00031815	0.00140629
SCIN	-1.57566	4.24068e-07	5.46095e-06
CNFN	-1.57317	9.73699e-07	1.0837e-05
CD163L1	-1.57206	3.74868e-05	0.00022717
C2orf58	-1.57157	3.50825e-06	3.10681e-05
SH2D2A	-1.57066	1.1074e-07	1.78341e-06
RNLS	-1.56927	3.29792e-12	5.36593e-10
CXCL1	-1.56697	0.000306864	0.00136199
C6orf97	-1.56688	6.01563e-06	4.89002e-05
SPIB	-1.56507	4.13668e-05	0.000245744
HIST1H1C	-1.56317	6.05722e-08	1.0817e-06
MT1G	-1.56312	7.85146e-06	6.08555e-05
LOC201651	-1.56268	1.93968e-07	2.83431e-06
DOCK5	-1.55916	2.41754e-05	0.00015779
PPAP2C	-1.55495	2.4946e-06	2.34166e-05
MAFB	-1.55482	4.01177e-08	7.81056e-07
LCK	-1.553	4.11471e-06	3.56683e-05
LST1	-1.5523	1.17937e-09	4.68572e-08
THNSL2	-1.55115	0.00276069	0.00880611
FCGR2C	-1.55	9.68768e-06	7.24315e-05
DIO3	-1.54832	0.000691886	0.00271315
CD96	-1.54267	3.51939e-07	4.68817e-06
SIGLEC7	-1.54188	3.8653e-09	1.19162e-07
ARPM1	-1.54149	1.07507e-05	7.90531e-05
GSTO1	-1.54011	3.5483e-16	5.59567e-13
LOC647121	-1.53996	6.05722e-08	1.07982e-06
C18orf34	-1.5391	0.000208892	0.000984253
DYNC1I1	-1.5356	0.00063453	0.00253676
CXCL2	-1.53505	0.000130218	0.000659485
PTGS2	-1.53492	0.000319854	0.00140988
TNFAIP8	-1.5348	1.2332e-11	1.48716e-09
TCN1	-1.53466	1.21818e-07	1.92699e-06
LILRA6	-1.53466	2.94234e-05	0.000186176
ARL11	-1.53337	6.23471e-11	4.93505e-09
RGS18	-1.5325	8.24961e-09	2.18226e-07
IL1RN	-1.53092	2.22784e-06	2.13724e-05
SLAMF8	-1.53049	2.1048e-06	2.0354e-05
DUOXA1	-1.52966	1.06721e-05	7.85318e-05
GSDMA	-1.52953	0.00217962	0.00719323
NUPR1	-1.52907	6.20159e-14	2.82531e-11
C10orf128	-1.52648	1.19228e-05	8.6188e-05
CHI3L2	-1.52594	0.000864847	0.00328338
CLIC2	-1.52289	9.10653e-13	1.92467e-10
FMO3	-1.52215	5.10095e-07	6.38428e-06
FCGR1A	-1.52002	8.50238e-10	3.69295e-08
SH2D6	-1.51809	0.000503422	0.00207242
HIST1H2AE	-1.5179	3.25504e-08	6.56808e-07
CD3G	-1.51737	4.69281e-05	0.00027535
TBC1D8B	-1.51557	7.10345e-09	1.91364e-07
PABPC5	-1.51374	0.000238621	0.00109735
CD79B	-1.51276	4.79729e-07	6.0822e-06
MST4	-1.51196	1.28452e-08	3.12013e-07
C2orf73	-1.51031	2.46763e-05	0.000160447
PRLR	-1.50947	2.53981e-05	0.000164306
TGFBI	-1.50888	1.18293e-07	1.87412e-06
TNFSF9	-1.50772	6.50798e-07	7.75698e-06
ADAMTS12	-1.50709	0.000563792	0.00229195
LOC100233209	-1.50601	7.49077e-11	5.62521e-09
FAM163A	-1.50599	0.000330214	0.00145211
NCF4	-1.50566	2.94869e-11	2.82482e-09
HMSD	-1.50558	0.00256004	0.00827162
FCER1G	-1.50543	3.56367e-11	3.29094e-09
LOC729156	-1.50364	3.89381e-06	3.42164e-05
TWIST2	-1.50359	8.94152e-05	0.000478367
PKD2L1	-1.50264	0.000217289	0.00101565
RFX8	-1.50262	0.000676562	0.00267146
LRRIQ3	-1.50228	7.79713e-07	9.02082e-06
CLDN23	-1.50225	4.79729e-07	6.07844e-06
LY86	-1.50164	2.62003e-09	8.76236e-08
ARHGEF5	-1.50005	1.02062e-05	7.58104e-05
GFPT2	-1.49809	2.45546e-08	5.27114e-07
ACP5	-1.49691	1.58017e-06	1.623e-05
VIT	-1.49685	0.00158688	0.00551026
LOC100133612	-1.49497	2.56723e-07	3.60732e-06
MTMR8	-1.49476	1.51392e-05	0.000105819
MSR1	-1.49411	4.86554e-09	1.4189e-07
IL1A	-1.4934	5.10095e-07	6.37261e-06
TUSC3	-1.49238	6.91672e-05	0.000382312
WFDC3	-1.4922	0.000108988	0.000567387
MT1DP	-1.49119	0.000267849	0.00121218
FCRL5	-1.49014	0.000632447	0.00253139
MMP12	-1.49005	0.00284383	0.00905581
HLA.DMB	-1.48991	8.24961e-09	2.18508e-07
LCN2	-1.48859	0.00182486	0.00618884
PRCD	-1.48756	6.69517e-06	5.31388e-05
C1QC	-1.48738	1.68161e-10	1.03217e-08
CHST4	-1.48515	6.08133e-05	0.00034298
CEACAM21	-1.48346	3.03459e-08	6.23994e-07
CD36	-1.48276	8.72418e-06	6.64887e-05
HSBP1L1	-1.4827	1.19386e-08	2.96313e-07
ADAM8	-1.4825	0.000119164	0.000613507
NXF3	-1.48236	2.15605e-05	0.000143278
HSD11B1	-1.48137	0.000259628	0.00117966
FLT3	-1.48113	0.00131753	0.0046853
PTGER2	-1.47892	8.72418e-06	6.62179e-05
HBA1	-1.47799	0.00140657	0.00497346
FCAR	-1.47777	0.00023545	0.00108544
C10orf125	-1.47774	2.62035e-13	7.67425e-11
INSL3	-1.47631	2.24333e-06	2.1371e-05
FCGR1B	-1.47583	1.59759e-08	3.68417e-07
GPR65	-1.47334	4.17458e-09	1.25673e-07
TPPP3	-1.47224	2.63905e-06	2.447e-05
FOLR1	-1.47185	0.00063453	0.00253429
NINJ2	-1.47171	4.93443e-08	9.24687e-07
FLJ36031	-1.47114	8.27819e-07	9.50763e-06
GMFG	-1.4709	2.00518e-10	1.17117e-08
CST6	-1.4706	3.42752e-05	0.000210067
TF	-1.46904	0.00112665	0.00409892
C13orf33	-1.4688	0.00194623	0.00655382
CACNA2D3	-1.46877	0.000832373	0.00317656
CASP5	-1.46842	7.3926e-06	5.78677e-05
GPR77	-1.46642	1.11363e-06	1.21053e-05
SERPINA1	-1.46369	1.84543e-08	4.15293e-07
PAPPA	-1.46329	0.00044357	0.00186383
FPR3	-1.46301	1.13225e-05	8.25177e-05
TNFRSF9	-1.45836	2.55993e-05	0.000165243
SCARNA5	-1.45829	0.00100367	0.0037323
SELE	-1.45818	6.24821e-05	0.000352102
EMB	-1.45744	6.48279e-08	1.14572e-06
TMEM191A	-1.4561	1.82259e-07	2.68619e-06
SELL	-1.45588	2.53981e-05	0.000164151
CST7	-1.45568	9.69893e-08	1.60742e-06
ELF3	-1.4555	0.000392763	0.00167541
ICAM4	-1.45409	2.41118e-07	3.41144e-06
PKP1	-1.45385	0.000653991	0.00259986
NGF	-1.45322	7.57449e-05	0.000415533
TMEM163	-1.45127	5.74355e-05	0.000325902
C1S	-1.45105	1.32762e-06	1.4095e-05
FCGR1C	-1.45059	1.03055e-08	2.64752e-07
GYPC	-1.45057	1.53919e-10	9.67945e-09
HCST	-1.45018	1.65497e-11	1.83397e-09
MGMT	-1.44906	1.38172e-08	3.2938e-07
CLEC4D	-1.44896	0.000611773	0.00245008
COL8A1	-1.44895	0.00285707	0.00908669
C1orf230	-1.44868	0.000631242	0.00252706
COL15A1	-1.44797	0.00108528	0.00397664
RBM11	-1.44651	0.00120397	0.00434783
CTSS	-1.44646	1.50287e-09	5.69509e-08
CLECL1	-1.44495	1.39084e-05	9.83903e-05
GNA15	-1.44479	2.58339e-09	8.72523e-08
CCR7	-1.44423	5.10095e-07	6.40776e-06
NQO1	-1.44339	9.10653e-13	1.88579e-10
PIR	-1.44334	3.8653e-09	1.19883e-07
HGF	-1.44256	0.000282334	0.00126794
IDO1	-1.44254	0.000461807	0.00193017
FAM179A	-1.44247	0.000520741	0.00213728
TXNDC3	-1.44171	3.81196e-05	0.00022985
C10orf81	-1.44041	0.00143276	0.0050417
CLCF1	-1.44016	5.70077e-06	4.66553e-05
ICOS	-1.43967	4.37813e-05	0.000258439
ME1	-1.43909	0.000113971	0.000590028
HLA.DQA1	-1.43886	2.80195e-05	0.00017856
TRAT1	-1.43792	4.25372e-06	3.66102e-05
GPR171	-1.43604	8.27699e-06	6.36245e-05
CALCB	-1.43589	0.000737525	0.00287234
FCGR3A	-1.43464	3.31116e-09	1.05735e-07
C16orf89	-1.43453	3.57248e-05	0.00021843
WISP2	-1.43445	2.53981e-05	0.000163996
DARC	-1.43358	0.00266725	0.0085761
ANKRD29	-1.4328	7.79713e-07	9.06173e-06
WNT4	-1.43256	0.00044357	0.00186078
C13orf26	-1.4323	0.000367112	0.00158345
CD1C	-1.43188	0.000496321	0.00205433
ZMYND10	-1.43175	0.000377058	0.00161582
STAR	-1.43072	8.88694e-09	2.32684e-07
DIO1	-1.42691	5.55372e-08	1.01477e-06
LGALS12	-1.4263	0.000443585	0.00186008
FCGR2A	-1.4252	2.06812e-09	7.2476e-08
COL3A1	-1.42493	0.00108528	0.00397593
PMCH	-1.42301	2.68151e-05	0.000171578
TSLP	-1.42177	0.000469279	0.00195304
GPR141	-1.42006	8.58252e-05	0.000461448
TNFAIP8L3	-1.41966	3.98594e-07	5.1883e-06
IQCA1	-1.41919	0.00201654	0.00673197
PRSS16	-1.41896	0.000576229	0.00233095
CD177	-1.41693	0.00141035	0.00496541
ADORA3	-1.41627	1.38661e-09	5.38389e-08
LAIR2	-1.416	5.45377e-06	4.47768e-05
STAT4	-1.41565	0.000248919	0.00113756
EHF	-1.4154	0.000343137	0.00149928
VNN1	-1.41431	5.76385e-07	7.00859e-06
ANGPTL4	-1.41301	0.00168668	0.00582621
RHOH	-1.41254	7.65607e-09	2.04105e-07
NDN	-1.41203	0.00112665	0.0041011
CD28	-1.41172	1.11363e-06	1.21181e-05
GRIP1	-1.41057	0.00188383	0.00634785
CDX1	-1.40907	1.11331e-06	1.21533e-05
ITIH1	-1.40883	0.00106973	0.00392597
SOCS3	-1.40845	5.11711e-06	4.26446e-05
PLBD1	-1.40813	1.17937e-09	4.65863e-08
HLA.DRB1	-1.40644	2.35766e-06	2.23666e-05
HIST1H2AC	-1.40612	9.69893e-08	1.60353e-06
LOC100128675	-1.40476	0.0027296	0.00874777
AIM2	-1.40419	0.000269887	0.00122113
SCARNA10	-1.4018	0.00164327	0.00568012
PNLIPRP3	-1.40048	1.28229e-07	2.00368e-06
LOC100287718	-1.3991	0.000706963	0.00277068
MNDA	-1.39719	4.60645e-08	8.74416e-07
TREML2	-1.39657	0.000542316	0.00220639
GCHFR	-1.39618	4.86554e-09	1.42092e-07
TUBA4A	-1.39591	2.95199e-06	2.68853e-05
TIMP1	-1.3938	1.18104e-06	1.27099e-05
VMO1	-1.3934	2.18854e-10	1.24286e-08
S100A12	-1.39274	0.0023786	0.00776368
NKG7	-1.39266	2.63566e-08	5.5533e-07
SULT1A1	-1.38936	3.8948e-06	3.39776e-05
KERA	-1.38836	0.000495154	0.00204991
LRRN4CL	-1.38816	2.53981e-05	0.000164462
EFCAB10	-1.38665	0.000184667	0.000884545
CLEC4A	-1.38592	2.62003e-09	8.81991e-08
CALCR	-1.38541	4.2847e-06	3.68614e-05
PYHIN1	-1.38432	1.18448e-05	8.57145e-05
C5AR1	-1.38414	1.32762e-06	1.40877e-05
P4HA2	-1.38297	1.28452e-08	3.10908e-07
PLAUR	-1.37987	9.57114e-09	2.47437e-07
RBP4	-1.37802	0.00299693	0.0094494
SLC22A16	-1.37498	4.7687e-05	0.000277815
BST1	-1.37402	8.50238e-10	3.71657e-08
SAT1	-1.37393	6.83516e-11	5.22865e-09
GTSF1	-1.37379	0.000295874	0.00131692
FGL1	-1.37313	0.000874038	0.00330237
SDC2	-1.37024	1.08721e-09	4.42238e-08
SFN	-1.36976	0.00201654	0.00671775
C9orf135	-1.3663	0.00247777	0.00804001
SYNGR2	-1.366	1.13413e-12	2.25737e-10
CMTM7	-1.36558	8.98711e-11	6.37525e-09
C19orf38	-1.36453	1.08721e-09	4.48467e-08
S100A11	-1.36421	1.00195e-09	4.14971e-08
ACTR3C	-1.36376	2.35766e-06	2.24289e-05
CD33	-1.36153	1.19386e-08	2.97032e-07
ZNF826	-1.36102	0.000108988	0.000566955
MRAP	-1.36062	0.00117976	0.00426188
IL7R	-1.35917	0.00135591	0.00481509
S100P	-1.35904	0.00124541	0.00447149
VENTX	-1.35819	3.93298e-05	0.000236036
CCDC122	-1.35799	2.08302e-05	0.000138875
GLRX	-1.35724	1.1171e-11	1.41368e-09
C1orf59	-1.35678	4.60645e-08	8.8012e-07
GZMM	-1.35654	4.59015e-06	3.90954e-05
THBD	-1.35522	2.1048e-06	2.03157e-05
C17orf67	-1.35468	1.38661e-09	5.37371e-08
DCN	-1.35182	0.00040907	0.00173738
IFI30	-1.35152	3.74261e-08	7.37052e-07
APOBEC3H	-1.35054	2.27874e-06	2.16983e-05
CD22	-1.34893	0.00266725	0.00858014
CD244	-1.34849	6.01563e-06	4.88421e-05
PSTPIP2	-1.34779	1.38172e-08	3.28615e-07
ADH4	-1.34771	8.52942e-06	6.50527e-05
C11orf52	-1.34646	3.68603e-06	3.25862e-05
PRSS23	-1.34582	1.10934e-08	2.78367e-07
SNAI1	-1.34564	4.3273e-05	0.000256029
RNF149	-1.34472	5.18181e-11	4.21557e-09
KLHDC7B	-1.34362	5.11711e-06	4.28537e-05
GPNMB	-1.34341	1.2523e-06	1.34205e-05
S100A1	-1.34328	0.00040907	0.00173451
STEAP2	-1.34308	0.000228718	0.00105678
WBP2NL	-1.34247	4.71206e-05	0.000276321
CPA6	-1.34214	0.000484966	0.00200814
POLE4	-1.34123	6.10082e-10	2.82331e-08
GNLY	-1.33995	0.000306864	0.00136081
PROCR	-1.33944	5.18181e-11	4.24929e-09
ST6GALNAC2	-1.33845	0.000238621	0.00109465
DUSP1	-1.3375	2.4946e-06	2.35243e-05
CHMP4C	-1.3374	0.000213425	0.000997818
TCTEX1D4	-1.33731	2.73532e-05	0.000174858
LOC100144603	-1.33629	1.08721e-09	4.44e-08
TRIM63	-1.336	0.00260323	0.00838209
psiTPTE22	-1.33583	0.000306864	0.00135699
FHL2	-1.3358	5.74355e-05	0.000326807
CACNA2D4	-1.33457	3.31116e-09	1.059e-07
TNFAIP8L2	-1.33434	3.8653e-09	1.18449e-07
VDR	-1.33218	0.00058658	0.00235979
LDB3	-1.33139	2.80195e-05	0.000178449
GSTO2	-1.33113	1.54005e-05	0.000107353
ZMYND12	-1.32985	3.93298e-05	0.000235829
NTRK1	-1.32925	0.00040907	0.00173558
RNASE6	-1.32879	5.15858e-10	2.44806e-08
CTSW	-1.32693	5.11711e-06	4.28887e-05
HIST1H2BC	-1.32661	5.76385e-07	7.05041e-06
LYPD3	-1.32618	5.28459e-08	9.734e-07
RPL39	-1.32599	4.50088e-12	7.04371e-10
EBI3	-1.32507	2.82842e-08	5.91086e-07
GRAP2	-1.32479	1.58044e-05	0.000109721
SLC11A1	-1.3246	5.10095e-07	6.34554e-06
LOC643008	-1.32321	1.34894e-07	2.09029e-06
MAPK13	-1.32311	8.27819e-07	9.48638e-06
SLA2	-1.32241	3.10502e-07	4.18789e-06
C1orf162	-1.32233	1.48592e-08	3.51359e-07
RGS1	-1.32175	1.88469e-05	0.00012689
SERPINA5	-1.3216	6.6041e-05	0.000367709
COL17A1	-1.32132	0.00017153	0.000829177
KIAA1377	-1.32017	0.000361934	0.00156739
C6orf165	-1.32012	4.12574e-05	0.00024681
C9orf122	-1.31972	0.00319437	0.00997528
CD1D	-1.31883	5.70077e-06	4.66926e-05
GPR34	-1.31836	6.05722e-08	1.08359e-06
RUNX2	-1.31815	4.79729e-07	6.05599e-06
SERPINF1	-1.31722	2.45546e-08	5.24915e-07
IL31RA	-1.31692	0.00205691	0.00684336
IL18	-1.31675	5.25075e-09	1.50343e-07
SELP	-1.31668	0.000899101	0.00338024
TNFSF14	-1.31653	0.00188145	0.00634088
HIST2H4A	-1.31227	1.84543e-08	4.17124e-07
LOC100302640	-1.31138	6.93675e-08	1.20619e-06
UPP1	-1.31136	1.91026e-09	6.7405e-08
RAB32	-1.31095	3.37328e-10	1.77778e-08
LTC4S	-1.30903	1.44004e-07	2.2048e-06
PRELID2	-1.30892	1.98821e-06	1.94282e-05
ITIH3	-1.30844	6.16169e-05	0.000347322
TMEM171	-1.3082	6.27099e-05	0.000353191
FBXO2	-1.30716	0.000169361	0.000823743
SLC10A6	-1.30581	0.000679212	0.0026814
PPM1N	-1.30573	1.34894e-07	2.08399e-06
SELENBP1	-1.30557	0.000192792	0.000916609
PDE6G	-1.30551	5.15858e-10	2.45374e-08
SCGB3A1	-1.30501	1.0635e-05	7.82863e-05
ASB9	-1.30497	4.79729e-07	6.09351e-06
RGS14	-1.30443	2.1297e-08	4.68969e-07
RPL9	-1.30123	2.18937e-05	0.000144322
LOC100133669	-1.29987	5.11711e-06	4.28187e-05
LAIR1	-1.29974	4.93443e-08	9.2723e-07
CD69	-1.29973	1.54005e-05	0.000107463
S100A10	-1.29903	3.48786e-06	3.09946e-05
FANK1	-1.29878	2.12224e-07	3.06179e-06
VNN3	-1.29862	0.000381024	0.00163111
STOM	-1.29776	1.83658e-10	1.08507e-08
HTR3A	-1.29725	0.000545256	0.00221747
HIST1H4H	-1.29697	5.40151e-06	4.46337e-05
CAV1	-1.29625	3.2431e-05	0.000201781
FAS	-1.29517	9.07394e-08	1.51117e-06
UBASH3A	-1.29397	0.00017235	0.000832554
KLRD1	-1.29388	1.25529e-05	8.99189e-05
NDRG1	-1.29387	2.94234e-05	0.000185946
CD53	-1.29325	1.62842e-09	6.03695e-08
PAX8	-1.29306	0.00121373	0.0043631
SPOCD1	-1.29252	0.00130692	0.00465481
SERPINB1	-1.29226	5.18181e-11	4.19891e-09
EDIL3	-1.29217	0.00194623	0.00654415
GTF2A1L	-1.29215	0.00103965	0.0038431
BDKRB2	-1.2912	0.00063453	0.00253824
APOC1	-1.29014	5.70077e-06	4.67299e-05
GPX3	-1.29013	0.000108988	0.000569556
NIPAL4	-1.2898	4.3273e-05	0.000256177
IL1F8	-1.28895	0.00110487	0.00403256
C3orf55	-1.28859	0.000916551	0.00344395
RARRES3	-1.2862	4.59015e-06	3.89982e-05
RRAS	-1.28425	2.21297e-11	2.24595e-09
HAS1	-1.2841	0.000628639	0.00251713
FRRS1	-1.28092	8.27699e-06	6.36484e-05
APOC2	-1.279	1.19228e-05	8.62184e-05
FBXL2	-1.27849	0.000210044	0.000985607
KCNJ15	-1.27821	8.69772e-05	0.000466663
IL10RA	-1.27768	1.40722e-06	1.47341e-05
NLRC4	-1.2773	1.86641e-07	2.73701e-06
C11orf86	-1.27708	0.000932155	0.0035013
NUDT7	-1.27683	2.63905e-06	2.45255e-05
DNAI1	-1.27667	0.00238103	0.00777037
AHR	-1.27659	3.08929e-05	0.000194156
FBXO15	-1.27655	1.88469e-05	0.000127099
SPATA4	-1.27612	0.000264694	0.00119816
C1orf97	-1.27554	3.56367e-11	3.30583e-09
RGS10	-1.27465	5.665e-09	1.59312e-07
TNF	-1.27403	0.000319854	0.00140836
KRT81	-1.27121	2.70597e-05	0.000173035
VAMP5	-1.27019	1.48592e-08	3.45384e-07
SLAMF7	-1.27009	9.19405e-06	6.91696e-05
CYGB	-1.27006	8.3105e-05	0.000449297
MRGPRF	-1.26932	0.000586523	0.0023642
LOC100271831	-1.26919	8.96246e-08	1.49991e-06
TNFSF4	-1.26909	7.10345e-09	1.91113e-07
HPRT1	-1.26906	5.83425e-13	1.4239e-10
HPGDS	-1.26889	1.49132e-06	1.54646e-05
MOCOS	-1.2687	0.000575849	0.00232988
TNNI2	-1.26813	3.48786e-06	3.09276e-05
PIK3AP1	-1.26716	4.93443e-08	9.23843e-07
HTR7	-1.26702	2.95199e-06	2.69932e-05
KLRF1	-1.26671	4.85361e-05	0.000282682
CD300A	-1.26668	1.38661e-09	5.36358e-08
TMSB10	-1.26652	1.13413e-12	2.23566e-10
BTBD16	-1.26572	2.07192e-05	0.000138225
C8orf83	-1.26532	1.45347e-13	5.13751e-11
SCNN1A	-1.26419	3.51318e-05	0.000215124
CD68	-1.26312	3.25504e-08	6.59404e-07
TCHH	-1.26283	0.000974038	0.00362409
GPR160	-1.26271	1.38172e-08	3.30147e-07
APOD	-1.26266	0.00194623	0.00655598
SVIP	-1.2611	6.69517e-06	5.30157e-05
SPINK6	-1.26021	7.34521e-05	0.00040317
PLB1	-1.25962	3.57799e-09	1.12331e-07
ELSPBP1	-1.25938	0.00238755	0.0077904
PRR15	-1.259	6.1252e-07	7.39098e-06
BIRC3	-1.25892	0.000541874	0.00221603
PYCARD	-1.2582	5.68496e-11	4.51734e-09
ANKRD7	-1.25756	0.000449931	0.00188631
IL1B	-1.25671	3.2431e-05	0.000201353
SULT1A2	-1.25593	0.00064653	0.0025712
TMEM70	-1.25582	5.66342e-17	1.65865e-13
PF4V1	-1.25512	1.02866e-05	7.5749e-05
LRRC25	-1.25497	4.93443e-08	9.26381e-07
AMPD3	-1.25364	4.01177e-08	7.84034e-07
MYO3A	-1.2536	0.00282673	0.00900277
DHRS3	-1.25179	3.09564e-10	1.68339e-08
CRABP2	-1.25126	0.000259628	0.00118149
RAC2	-1.251	3.8653e-09	1.19702e-07
FCGR3B	-1.2505	0.00248888	0.00806712
C2	-1.24839	0.000148597	0.000740492
CXCR3	-1.24754	0.000275176	0.00123796
SRPX2	-1.24713	9.96259e-05	0.000525182
CIDEC	-1.24692	3.41799e-06	3.05193e-05
PPARG	-1.2461	9.32603e-07	1.04249e-05
GPX1	-1.24531	2.97045e-12	5.03282e-10
ACTG2	-1.24393	0.00100667	0.00374212
HIST1H2BK	-1.2436	9.57114e-09	2.48063e-07
TNFSF13	-1.24273	1.00195e-09	4.14134e-08
CTSB	-1.24271	1.1171e-11	1.42246e-09
C2orf65	-1.24062	1.98821e-06	1.95306e-05
HAVCR2	-1.23889	2.82842e-08	5.90484e-07
SIGLEC9	-1.23852	3.03459e-08	6.19643e-07
GPR183	-1.23826	8.78732e-07	9.97502e-06
GLYATL1	-1.23792	0.00186419	0.00632117
HLA.DMA	-1.23645	1.10934e-08	2.7905e-07
PRRG4	-1.23598	1.13225e-05	8.23421e-05
AOAH	-1.23584	2.63905e-06	2.46709e-05
THEM4	-1.2352	2.3008e-05	0.000150603
TREM2	-1.23448	1.44004e-07	2.19659e-06
ALOX5AP	-1.23338	9.69893e-08	1.61002e-06
SLC31A2	-1.23306	1.38172e-08	3.27855e-07
TPD52L1	-1.23302	7.9394e-05	0.000430483
TIFA	-1.23272	7.42089e-08	1.26885e-06
FAM133A	-1.232	0.000586523	0.00236792
IL17B	-1.2316	7.53333e-05	0.000413385
FIGF	-1.22864	3.51438e-05	0.000215134
KIAA1257	-1.22836	0.000898477	0.00338659
CD300LF	-1.22815	1.77311e-06	1.78189e-05
C10orf11	-1.22755	1.38172e-08	3.31306e-07
C17orf60	-1.22632	7.93711e-08	1.35373e-06
KDELR3	-1.22619	0.00044357	0.00186574
KRT80	-1.22607	0.000451284	0.00189159
FAM167B	-1.22512	6.58905e-09	1.80591e-07
CEBPE	-1.22406	6.39182e-05	0.000357346
NCRNA00162	-1.22389	2.91415e-05	0.000184791
PROK2	-1.22364	0.00023086	0.00106524
DNAJC5B	-1.22324	4.54608e-05	0.000266817
TNFSF10	-1.22241	4.01177e-08	7.77365e-07
EPB41L3	-1.22239	2.22784e-06	2.13925e-05
PTPN22	-1.22231	6.30471e-05	0.00035373
SH2D1B	-1.22113	2.79138e-06	2.56389e-05
TIGIT	-1.21987	0.000704613	0.002762
HCK	-1.21983	6.05722e-08	1.08264e-06
CLEC3B	-1.2182	8.72418e-06	6.64639e-05
P2RY8	-1.21814	7.5838e-05	0.000413609
ODF3B	-1.21808	0.000113971	0.000589284
COL29A1	-1.2173	0.000727925	0.00283657
LOC151174	-1.21582	0.000480732	0.00199625
SLC39A4	-1.21492	6.30471e-05	0.000353439
C7orf13	-1.21472	0.00044357	0.00186766
SPHK1	-1.21432	9.32603e-07	1.04079e-05
STARD5	-1.2138	1.08721e-09	4.4049e-08
POU2AF1	-1.21235	0.000119305	0.000610097
PMAIP1	-1.21221	0.000238621	0.00109636
TLL2	-1.21169	0.000832373	0.00316536
LAPTM5	-1.21051	1.71725e-08	3.90303e-07
MYO1G	-1.21026	0.000130218	0.000657536
ST14	-1.20899	1.13225e-05	8.208e-05
CCL28	-1.20852	0.00038105	0.00163088
ASIP	-1.20804	3.08167e-05	0.000193915
C20orf141	-1.20641	0.000171032	0.000826965
SAMSN1	-1.20583	9.69893e-08	1.59709e-06
HSPB2	-1.20487	2.3008e-05	0.00015094
ADIG	-1.2048	0.00160396	0.0055677
HBG1	-1.20447	0.00271677	0.00870803
PRSS21	-1.20396	0.000257499	0.00117311
GIMAP5	-1.20388	2.2384e-09	7.67382e-08
SCGB3A2	-1.20098	0.00117525	0.00424637
MSL3L2	-1.20082	0.00135591	0.00481342
CD86	-1.20013	8.88694e-09	2.33878e-07
CETN4P	-1.19984	6.48279e-08	1.14671e-06
HPD	-1.19967	0.00295647	0.00934629
NLRP12	-1.1994	0.000544611	0.00221529
OLFML2B	-1.19745	4.12574e-05	0.000245877
LOC285954	-1.197	0.00168772	0.00579369
TLR2	-1.19627	2.45546e-08	5.23823e-07
CRIP1	-1.1944	2.18937e-05	0.000145022
FOLR3	-1.19346	3.75427e-05	0.000226438
COX7B	-1.19267	9.15513e-12	1.19547e-09
LY9	-1.1923	1.44285e-05	0.000101579
LOC653786	-1.19161	0.000801019	0.00306947
AMDHD1	-1.19149	6.69517e-06	5.34909e-05
FLJ36777	-1.19076	2.53981e-05	0.000164618
NUDT18	-1.19054	5.83425e-13	1.39079e-10
CD5	-1.19043	0.000210044	0.000987642
NOD2	-1.19015	7.4466e-06	5.81351e-05
GPR84	-1.18981	7.4466e-06	5.81572e-05
TWIST1	-1.18971	0.000801019	0.00306546
HLA.DPB1	-1.18848	2.91565e-07	3.99023e-06
ALOX5	-1.18756	9.07394e-08	1.51733e-06
EOMES	-1.18743	0.000134773	0.000679034
PRSS36	-1.18651	3.74261e-08	7.34934e-07
HIST1H2BG	-1.1824	5.4808e-05	0.000313685
GBGT1	-1.17965	1.50287e-09	5.67411e-08
LOC96610	-1.17946	4.51084e-07	5.76179e-06
NT5DC1	-1.17805	5.10095e-07	6.35712e-06
C1orf38	-1.17705	1.04988e-06	1.15346e-05
GLT8D2	-1.17663	0.000377058	0.00162056
LTBP2	-1.17657	6.6041e-05	0.000368109
SQRDL	-1.17629	2.68069e-11	2.60459e-09
LOC144571	-1.176	6.58905e-09	1.8035e-07
SH2D1A	-1.17592	0.00075773	0.00293542
LTB	-1.17566	5.22932e-05	0.000301057
NAMPT	-1.1752	0.000425998	0.00179736
C1orf88	-1.17494	0.000520741	0.00214114
BNC2	-1.17337	0.00201654	0.00674625
CLEC7A	-1.17285	1.18293e-07	1.88872e-06
PEBP4	-1.17271	0.00138402	0.00490048
CES8	-1.16865	0.000891123	0.00336568
MTL5	-1.16748	0.000161604	0.000793541
PERP	-1.16686	4.12574e-05	0.000245663
LGALS1	-1.16597	3.74261e-08	7.35639e-07
C5orf32	-1.16588	8.28279e-12	1.14733e-09
TMPRSS13	-1.16579	1.93345e-05	0.000129917
USMG5	-1.16485	7.29681e-13	1.64387e-10
RPL31P11	-1.16359	4.32437e-08	8.26995e-07
FBP1	-1.16254	1.67401e-06	1.6998e-05
FAM89A	-1.16254	9.68768e-06	7.24843e-05
TMTC1	-1.16209	1.25529e-05	8.96682e-05
HLA.DQB1	-1.1605	0.00140657	0.0049726
PTGER4	-1.15963	7.85146e-06	6.07178e-05
MIF	-1.15942	7.49077e-11	5.5843e-09
AGPAT9	-1.15929	9.68768e-06	7.25903e-05
CCDC69	-1.15888	6.93675e-08	1.21236e-06
STAB1	-1.15879	4.11471e-06	3.55032e-05
RAET1G	-1.15792	4.75837e-05	0.000277528
FBLN1	-1.15762	0.00130692	0.00466616
CD55	-1.15698	7.20647e-10	3.25418e-08
CSRP3	-1.15641	8.44726e-05	0.000454295
LEP	-1.15508	0.00300431	0.00947123
PRDX4	-1.15503	4.00173e-10	2.03572e-08
DAPP1	-1.15491	2.41754e-05	0.000157891
GPX8	-1.15219	3.57248e-05	0.00021791
CLRN3	-1.15173	0.000306754	0.00136475
S100Z	-1.14987	4.75837e-05	0.000277371
IL1RL2	-1.14946	0.0017518	0.00597764
NUDT16P1	-1.14939	1.17937e-09	4.66762e-08
TUBA1C	-1.14884	2.45546e-08	5.23278e-07
RIPK3	-1.14882	8.27819e-07	9.46521e-06
ZNF702P	-1.14821	6.69517e-06	5.29135e-05
EGFLAM	-1.14806	3.40406e-05	0.000209633
DSE	-1.148	7.20647e-10	3.22576e-08
CCDC153	-1.14689	0.000597497	0.00240323
CYP19A1	-1.14552	0.00125954	0.0045151
GPSM3	-1.14535	4.35655e-10	2.19444e-08
HIST1H2BD	-1.14473	3.12131e-06	2.82891e-05
DENND2D	-1.14443	2.22784e-06	2.14025e-05
EFEMP1	-1.14427	0.000108988	0.000570283
TMEM52	-1.1407	0.00298687	0.00942059
RAB38	-1.14062	3.40406e-05	0.000209005
LOC100240735	-1.14059	4.52796e-05	0.000267207
ACSL1	-1.1402	6.48279e-08	1.14869e-06
PLA2G2D	-1.14006	0.00067426	0.00266288
C14orf72	-1.13993	7.23122e-05	0.000399265
COLEC12	-1.13987	0.000586523	0.00236886
APOBEC3G	-1.13984	1.18293e-07	1.89314e-06
HLA.DOA	-1.13974	1.02062e-05	7.55367e-05
C1orf201	-1.13959	0.000228718	0.00106037
PAMR1	-1.13742	0.000169361	0.000821988
RORC	-1.137	0.000164824	0.000803965
CLEC4E	-1.13653	0.00140657	0.00497689
IL4I1	-1.13494	9.68768e-06	7.23787e-05
RASL11A	-1.13485	3.51939e-07	4.66694e-06
SPEF1	-1.13447	0.00187815	0.00633707
DPYD	-1.13351	7.9394e-05	0.000431739
SLAMF1	-1.13347	2.66787e-05	0.000171079
RDH10	-1.1331	4.75837e-05	0.00027745
FRZB	-1.1324	1.88469e-05	0.000127057
C3AR1	-1.13065	1.34894e-07	2.10141e-06
SLC25A21	-1.12887	0.00034517	0.00150785
BNC1	-1.12885	0.000802169	0.00306815
SNORD15B	-1.12812	0.000941468	0.00352209
CYTH4	-1.12806	9.57114e-09	2.49007e-07
C22orf41	-1.1263	0.00125954	0.00451747
MGC87042	-1.12563	0.00112665	0.00410256
TPRG1	-1.12545	7.79713e-07	8.98532e-06
IGF1	-1.12521	0.000259628	0.0011794
CXorf21	-1.12499	1.40722e-06	1.47567e-05
FCRL6	-1.12439	0.000164872	0.000804004
ATP6V0E1	-1.12425	1.57615e-16	3.23127e-13
MCOLN2	-1.12405	0.00108528	0.00396955
CD7	-1.12364	2.63905e-06	2.46371e-05
FTH1	-1.12329	2.4361e-11	2.44816e-09
OSCAR	-1.12137	7.34265e-07	8.58219e-06
VWDE	-1.12118	0.00122772	0.00440872
TNIP3	-1.12058	3.72782e-05	0.000226308
IL2RG	-1.11951	2.4946e-06	2.34919e-05
TMEM37	-1.11913	1.49132e-06	1.53559e-05
C11orf75	-1.11877	2.60454e-10	1.44704e-08
LOC729467	-1.11788	6.63922e-05	0.000369264
TMEM17	-1.11688	1.53919e-10	9.53324e-09
PPP1R14A	-1.11652	0.00151309	0.00528629
LILRB3	-1.11591	4.98865e-05	0.000289477
SOD3	-1.11582	9.19405e-06	6.91189e-05
SLA	-1.11579	6.69517e-06	5.30362e-05
CREG1	-1.1137	4.50742e-09	1.33343e-07
SIRPB2	-1.11339	1.79232e-05	0.000121469
BCL3	-1.11337	3.57248e-05	0.000218495
MMP11	-1.11331	0.000104209	0.000548497
C12orf60	-1.11275	1.2523e-06	1.34416e-05
SIGLEC10	-1.11257	9.68768e-06	7.20897e-05
RPL17	-1.11209	1.45347e-13	5.05043e-11
OSGIN1	-1.11004	9.32603e-07	1.04306e-05
RAB11FIP1	-1.11	4.53805e-05	0.000267034
TNFSF8	-1.1099	1.25529e-05	8.9637e-05
PLEK	-1.10973	4.11471e-06	3.56081e-05
ZG16B	-1.10895	0.00119948	0.00433239
HIST1H2BJ	-1.10822	3.12131e-06	2.82766e-05
C12orf62	-1.10643	1.824e-11	1.97851e-09
ANXA2	-1.10562	2.79138e-06	2.58357e-05
MYEOV2	-1.1056	5.76385e-07	7.03362e-06
ANXA4	-1.1051	1.50287e-09	5.70563e-08
MYL12A	-1.10491	1.2332e-11	1.51388e-09
H2AFJ	-1.10478	1.65497e-11	1.84394e-09
DHH	-1.10474	0.00145802	0.00512883
TP53TG1	-1.10346	7.49037e-12	1.05903e-09
MAN1A1	-1.10296	9.10169e-05	0.000485542
FBXO32	-1.10291	9.68768e-06	7.24579e-05
RAG1AP1	-1.10273	6.76105e-15	4.62028e-12
SMTNL2	-1.10217	0.000388353	0.00166109
CCDC152	-1.10216	0.00145895	0.0051277
SLC2A5	-1.10185	3.10502e-07	4.18514e-06
ITK	-1.10114	2.08302e-05	0.000138784
TMEM176B	-1.10038	4.98865e-05	0.000288497
TMEM144	-1.10004	0.00224148	0.00736301
PCOLCE	-1.09995	0.00276069	0.0088212
C16orf54	-1.09959	2.26233e-07	3.23883e-06
NAT8B	-1.09921	6.80839e-06	5.37669e-05
BACE2	-1.09908	2.1048e-06	2.04796e-05
FYB	-1.09881	3.8948e-06	3.40646e-05
ARPC1B	-1.09858	5.6108e-10	2.6443e-08
SLC26A9	-1.09853	0.00077075	0.00296568
ECHDC3	-1.09821	0.000294363	0.0013159
LOC150381	-1.09722	2.83994e-10	1.5609e-08
LOC374491	-1.0971	0.0023786	0.00776491
CTBS	-1.09637	4.30043e-11	3.80014e-09
PLIN2	-1.09621	9.68768e-06	7.21683e-05
GPR18	-1.09593	4.74549e-05	0.000278122
ELANE	-1.09581	0.00253887	0.00820711
MGC14436	-1.09569	0.000639285	0.00254337
RPS6	-1.09535	5.665e-09	1.59093e-07
CYP39A1	-1.09459	0.00075773	0.00293597
CSF2RB	-1.09453	8.3105e-05	0.000449416
C3orf54	-1.09274	1.28452e-08	3.14622e-07
KIAA1324	-1.09242	0.000219197	0.00102201
TMEM106A	-1.08953	3.03459e-08	6.19026e-07
C8orf4	-1.08919	1.88469e-05	0.000127267
FXYD5	-1.08832	1.38172e-08	3.30533e-07
TPT1	-1.08807	1.08721e-09	4.38756e-08
SASH3	-1.08775	2.12224e-07	3.05319e-06
ALB	-1.08719	0.00201274	0.00673796
SIRPG	-1.08697	2.70179e-05	0.000172822
A1BG	-1.08602	0.00077075	0.00298529
PIGP	-1.0853	1.84324e-13	5.90442e-11
TLR5	-1.08521	3.40406e-05	0.00020888
CD74	-1.08495	5.10095e-07	6.40383e-06
BAIAP2L1	-1.08164	0.000563792	0.0022915
LY75	-1.08163	0.000136095	0.000683846
GCET2	-1.07983	3.40406e-05	0.00020957
PTPLAD2	-1.07825	1.34894e-07	2.08242e-06
DPEP2	-1.07744	5.40151e-06	4.47239e-05
PDK4	-1.07662	0.00135591	0.00481175
ANXA2P2	-1.07618	3.29978e-06	2.97227e-05
TMEM176A	-1.07462	0.000228718	0.00105655
CASP4	-1.0741	6.05722e-08	1.08643e-06
C1orf54	-1.07275	2.12224e-07	3.0661e-06
NKX3.1	-1.07254	5.40151e-06	4.46158e-05
DUSP2	-1.07199	0.000184667	0.000884752
C9orf66	-1.07175	4.49492e-06	3.83481e-05
TBC1D10C	-1.06996	5.40151e-06	4.44903e-05
C6orf115	-1.06954	1.65497e-11	1.86421e-09
ARHGAP15	-1.06944	4.17458e-09	1.2679e-07
ARHGAP24	-1.06829	3.03459e-08	6.26507e-07
C17orf61	-1.06624	2.28705e-08	4.99328e-07
SLC16A8	-1.06606	0.00216409	0.0071489
TYMP	-1.06598	3.74868e-05	0.0002263
NHLRC4	-1.06596	1.48592e-08	3.47353e-07
ENOSF1	-1.0653	0.000898477	0.00338908
CNTNAP3	-1.06499	0.00130692	0.00466778
FETUB	-1.06467	0.00037603	0.00162158
RBX1	-1.06462	4.74136e-10	2.29793e-08
BLVRB	-1.06428	8.98711e-11	6.39738e-09
C10orf107	-1.06397	0.000162158	0.000795692
TMEM119	-1.06282	0.000130218	0.000656727
SPINT2	-1.06274	1.26334e-07	1.97859e-06
POLD4	-1.06203	1.73086e-14	8.87108e-12
TMEM26	-1.06191	0.000319854	0.00140866
SMOC2	-1.06157	0.000659862	0.00261256
OSTF1	-1.06116	1.01653e-12	2.08399e-10
CEBPB	-1.06095	1.34894e-07	2.09982e-06
HCLS1	-1.06012	6.34683e-06	5.0986e-05
GXYLT2	-1.0598	0.00015524	0.000766147
DPCD	-1.0583	8.15375e-13	1.79742e-10
C14orf34	-1.05662	7.91269e-06	6.10761e-05
PTGDR	-1.05644	0.00129474	0.00462831
FUCA1	-1.05636	1.38661e-09	5.31345e-08
C10orf78	-1.05633	6.11778e-12	9.08845e-10
AGMAT	-1.05632	5.70077e-06	4.67486e-05
C9orf72	-1.05379	4.51084e-07	5.77258e-06
FCGBP	-1.05316	0.00077075	0.00297685
RPS24	-1.05286	3.7053e-13	1.01283e-10
CCDC74B	-1.05279	5.76385e-07	7.07574e-06
DMBT1	-1.05276	0.000318793	0.00140883
RPS7	-1.05156	7.82881e-10	3.44417e-08
C1orf65	-1.05092	0.000428872	0.00180689
SLC2A9	-1.05081	1.38172e-08	3.28235e-07
ITGB7	-1.05052	6.01563e-06	4.87456e-05
GAS5	-1.05011	1.49132e-06	1.54881e-05
OSTC	-1.04995	1.83658e-10	1.0882e-08
IGFBP4	-1.04979	9.69893e-08	1.60224e-06
CPM	-1.04936	0.000136095	0.000685357
C3	-1.04929	7.4466e-06	5.82238e-05
RPS18	-1.04861	6.93675e-08	1.2011e-06
CYB5R1	-1.04859	1.40837e-10	9.02282e-09
HIST1H4C	-1.04841	3.08167e-05	0.000193855
LOC645166	-1.0482	6.30471e-05	0.000354214
C9orf95	-1.04783	6.05722e-08	1.08738e-06
OAZ3	-1.04698	2.06812e-09	7.21062e-08
MS4A1	-1.04553	0.00241747	0.00785303
SIGLEC14	-1.04437	0.000319854	0.00140897
SOD2	-1.04435	0.00266725	0.00855464
FERMT3	-1.04426	1.18293e-07	1.88432e-06
TSPO	-1.04314	4.30043e-11	3.71996e-09
RPLP0P2	-1.042	8.27699e-06	6.34106e-05
SLC6A6	-1.04121	9.52308e-05	0.000503956
ARHGDIB	-1.04086	1.17937e-09	4.72232e-08
SPINT1	-1.04042	6.34683e-06	5.08863e-05
PQLC3	-1.04014	4.29932e-08	8.26057e-07
CYBA	-1.03974	5.665e-09	1.60412e-07
CLDN2	-1.03951	0.000167394	0.000815917
COX7A2L	-1.0393	8.9691e-14	3.67751e-11
ARPC5	-1.03886	1.6342e-15	1.59537e-12
TFEC	-1.03886	4.84687e-06	4.08241e-05
TMSL3	-1.03662	3.56367e-11	3.24706e-09
LCA5L	-1.03572	0.000270761	0.00122158
SCPEP1	-1.03554	6.23471e-11	4.91607e-09
C22orf26	-1.03537	1.40837e-10	9.05111e-09
LOC100188949	-1.03424	0.000396221	0.00168421
SPTLC3	-1.03231	0.000520741	0.00213344
C10orf35	-1.03192	7.9394e-05	0.000432083
IFITM2	-1.03131	6.93675e-08	1.20824e-06
HIST1H3D	-1.03044	4.12574e-05	0.000246378
NENF	-1.02971	3.56367e-11	3.27618e-09
C1orf200	-1.02855	0.000230785	0.00106513
DEFB1	-1.02729	0.000200657	0.000952017
FAM82A1	-1.02725	3.03459e-08	6.22744e-07
GNGT2	-1.02724	5.10095e-07	6.38039e-06
NDUFA2	-1.02661	5.28459e-08	9.71654e-07
WBSCR27	-1.02606	0.00187815	0.00633498
CCR1	-1.02567	7.06147e-06	5.56369e-05
SILV	-1.02532	4.98865e-05	0.000288823
B4GALT1	-1.02431	9.89595e-07	1.09841e-05
MT1L	-1.02423	0.00077075	0.00297237
MYLIP	-1.02413	8.27819e-07	9.48108e-06
DAB2	-1.02325	5.70077e-06	4.66181e-05
LOC440957	-1.02323	1.3608e-11	1.60332e-09
GNG10	-1.02266	4.98796e-12	7.74683e-10
RPS21	-1.02219	2.2384e-09	7.66101e-08
SLC39A8	-1.02121	2.63905e-06	2.44811e-05
RAB27A	-1.02066	1.98821e-06	1.94097e-05
KIAA1751	-1.02001	0.00280599	0.00894089
NHLRC1	-1.01954	0.000108988	0.000568542
CTSL1	-1.01941	3.67467e-10	1.9072e-08
CCDC64B	-1.01786	0.000773635	0.00297288
CMC1	-1.01742	7.49077e-11	5.66672e-09
DEPDC6	-1.01659	1.79232e-05	0.000122155
NCRNA00189	-1.01656	0.000427724	0.00180242
ANKRD22	-1.01638	0.000124577	0.000636579
FOLH1	-1.01634	0.000361934	0.00156871
SYK	-1.01614	9.32603e-07	1.04022e-05
ABCA17P	-1.016	2.53981e-05	0.000165088
HMOX1	-1.01504	0.000108988	0.000569411
CD247	-1.01453	1.32762e-06	1.40805e-05
HLA.DPA1	-1.01406	4.59015e-06	3.90629e-05
SSR4	-1.01403	6.77084e-12	9.98626e-10
CMKLR1	-1.01338	0.000377058	0.00162226
P2RY2	-1.01307	0.000832373	0.0031683
IGFBP7	-1.01296	1.98153e-05	0.000132669
MGC72080	-1.01026	1.07673e-10	7.33356e-09
FLJ44635	-1.00986	7.34265e-07	8.62646e-06
COMMD8	-1.00901	8.50238e-10	3.70866e-08
IL11	-1.00831	0.00158895	0.0055165
MGST3	-1.00812	2.33182e-13	6.9282e-11
SEPP1	-1.00754	2.41754e-05	0.000157439
CD226	-1.00665	0.000392763	0.00167751
SOAT2	-1.00623	0.000208439	0.000982346
LOC606724	-1.00613	1.48592e-08	3.48147e-07
EMG1	-1.00601	7.49077e-11	5.64589e-09
NEBL	-1.00547	0.000832373	0.00316889
TXN	-1.00522	1.824e-11	1.9375e-09
ERP27	-1.00503	0.000124577	0.00063547
DLEU7	-1.00499	0.000136095	0.000685189
PARVG	-1.00492	8.78732e-07	9.9365e-06
TNS4	-1.00394	1.40555e-05	9.89875e-05
SLC7A8	-1.0035	9.10169e-05	0.000484533
FASLG	-1.00338	0.00106203	0.00389842
TMBIM4	-1.00327	3.37328e-10	1.76417e-08
ADRB2	-1.00313	0.000219197	0.0010241
TMEM14B	-1.00273	1.38661e-09	5.27402e-08
SLC7A7	-1.00227	4.51084e-07	5.7439e-06
CFI	-1.00217	0.000319854	0.00141261
NAT1	-1.00116	3.10502e-07	4.19341e-06
CLIC3	-0.999592	0.0024531	0.007965
RBKS	-0.998412	1.19386e-08	2.95597e-07
SLC45A3	-0.998239	0.000864847	0.00327307
ZCCHC5	-0.997627	0.00131413	0.00467402
ATP6V0B	-0.997243	8.28279e-12	1.15514e-09
CD300C	-0.99682	4.51084e-07	5.76898e-06
ICAM1	-0.996337	0.0010453	0.00385496
SNHG5	-0.996314	6.6041e-05	0.00036761
C1R	-0.993171	0.000659862	0.00262066
POMC	-0.993056	2.08302e-05	0.000138559
NCR3	-0.99179	1.57673e-05	0.0001095
ZNF185	-0.991746	8.27699e-06	6.3198e-05
PILRA	-0.991372	1.64009e-07	2.45607e-06
RPL22L1	-0.990454	3.57248e-05	0.000217199
SPNS3	-0.989763	7.5838e-05	0.000413279
MR1	-0.989054	8.98711e-11	6.30975e-09
MSRB2	-0.988217	1.33426e-16	3.03929e-13
CTSZ	-0.987029	2.53981e-05	0.000164879
HLA.DQB2	-0.98649	0.00276069	0.00883222
RPL27	-0.985919	3.74261e-08	7.34231e-07
ZNRF2	-0.985517	6.63163e-10	3.00122e-08
CDNF	-0.98338	0.000306864	0.00136258
LCTL	-0.982851	0.000124577	0.000635154
CEACAM1	-0.982439	0.00077075	0.00297966
CD40	-0.981826	3.10502e-07	4.21005e-06
CARD16	-0.980803	0.00116945	0.00424711
CD59	-0.980703	4.74136e-10	2.32542e-08
C1orf182	-0.97997	0.00041727	0.00176708
SPATA12	-0.97983	8.69772e-05	0.000465931
MALL	-0.979826	0.00112665	0.00410329
RND3	-0.979287	1.87775e-06	1.85611e-05
HKDC1	-0.979262	0.00232136	0.00759983
LGALS3	-0.978842	0.00135591	0.00481425
ODF3L1	-0.978198	4.12574e-05	0.000245949
RPS12	-0.97774	9.23118e-10	3.88601e-08
RPL31	-0.977258	1.3608e-11	1.58511e-09
CLDN7	-0.977177	4.51084e-07	5.76539e-06
OST4	-0.976145	1.94578e-12	3.62641e-10
DOK3	-0.975704	5.76385e-07	7.06305e-06
PGK1	-0.9748	1.03648e-07	1.6891e-06
ERC2	-0.974541	0.000520741	0.00213771
LCP1	-0.974321	1.19228e-05	8.59153e-05
RBP5	-0.974318	0.000785481	0.00301783
GBP5	-0.97401	0.00201654	0.00673416
RNF181	-0.973928	4.15412e-13	1.12057e-10
NFAM1	-0.973881	0.000113971	0.000589581
STAMBPL1	-0.973529	2.35766e-06	2.23253e-05
ITGB2	-0.972602	3.8948e-06	3.405e-05
LILRB1	-0.971362	9.52308e-05	0.000504999
MYLK	-0.971318	0.000228718	0.00105845
TCEAL7	-0.971047	1.32762e-06	1.39649e-05
RPL34	-0.970029	3.67467e-10	1.89282e-08
NFE2L3	-0.970005	0.00116945	0.0042396
NCF1B	-0.969815	6.91672e-05	0.000383242
ANO9	-0.969537	0.00249746	0.00807579
ADAM28	-0.969041	0.00015524	0.000767071
TRPV4	-0.969004	0.00116945	0.00423062
ANAPC16	-0.966436	2.52814e-15	2.15956e-12
RASGEF1B	-0.965249	0.000586523	0.00236141
C21orf91	-0.965063	0.000933299	0.00350367
S100A6	-0.964866	5.40151e-06	4.4544e-05
SPI1	-0.963663	4.79729e-07	6.04482e-06
LYL1	-0.962593	3.25504e-08	6.54874e-07
CD300LB	-0.962154	1.79232e-05	0.000122277
SLC16A3	-0.962021	0.000124577	0.000633893
LOC285830	-0.961936	0.000130218	0.00065786
GIMAP4	-0.961386	3.51939e-07	4.67905e-06
C13orf31	-0.96108	0.0010453	0.00386051
NCKAP1L	-0.961036	4.3273e-05	0.000256251
HIST1H2BO	-0.960832	0.00063453	0.00253379
CD37	-0.960757	1.88469e-05	0.000127183
DMC1	-0.96035	0.00187815	0.00635799
ANG	-0.959971	5.10095e-07	6.41956e-06
SUMO1P1	-0.959927	0.00020342	0.000958911
PRR24	-0.95975	8.48742e-08	1.4274e-06
PARM1	-0.959434	0.00285707	0.00907121
WBSCR26	-0.957933	0.000199582	0.000947137
CCR5	-0.957726	0.000210044	0.000987868
NIPAL2	-0.957282	0.000228718	0.00105774
EMR2	-0.954794	7.9394e-05	0.00043151
MYL9	-0.954692	2.66787e-05	0.000171562
MYLPF	-0.95428	0.000176425	0.000852036
ATP8B4	-0.953874	6.01802e-05	0.000341005
IL15RA	-0.953608	1.58017e-06	1.61894e-05
RPL26	-0.953118	2.21297e-11	2.25712e-09
ETNK2	-0.952159	2.66787e-05	0.000171777
IKZF3	-0.951753	0.00102045	0.00377349
NFKBIZ	-0.951039	0.000184667	0.000883101
GALNT6	-0.950977	1.39084e-05	9.83225e-05
EAF2	-0.950619	7.93711e-08	1.35148e-06
ST6GALNAC3	-0.950471	4.53805e-05	0.000266728
RNF125	-0.949505	6.30471e-05	0.000353633
MFSD7	-0.94949	9.96259e-05	0.000525722
GUK1	-0.9488	1.53919e-10	9.70924e-09
KRT15	-0.948736	0.00163699	0.00566125
ANXA2P1	-0.948602	2.18937e-05	0.000145351
KRT86	-0.94814	0.00019659	0.00093337
CSF1R	-0.947441	4.12574e-05	0.000246738
BIK	-0.947385	0.00304601	0.00959825
CASS4	-0.946794	0.000377058	0.00162328
SFTPB	-0.946668	0.00105754	0.00388264
FAM58A	-0.946402	2.00949e-11	2.10187e-09
RPS15A	-0.946104	4.86554e-09	1.41287e-07
DYRK3	-0.946066	1.27898e-09	5.0039e-08
PFDN5	-0.94531	1.64009e-07	2.45786e-06
ACSM3	-0.944892	0.0010457	0.00383986
FAM105A	-0.944651	7.34265e-07	8.6314e-06
FBXO16	-0.944299	3.12131e-06	2.83267e-05
LACTB2	-0.944072	1.18293e-07	1.88139e-06
HINT1	-0.943972	8.50238e-10	3.68514e-08
TBXAS1	-0.943958	1.2523e-06	1.33299e-05
GPR132	-0.943406	4.3273e-05	0.000256621
BEST1	-0.943305	0.000228718	0.00106085
TMEM45A	-0.94296	8.27699e-06	6.32451e-05
RPL35A	-0.94263	4.35655e-10	2.16256e-08
RASGRP4	-0.941912	1.46366e-05	0.000102516
GLRX2	-0.941139	1.01294e-13	3.84562e-11
ACTA2	-0.940761	3.40406e-05	0.000210011
GGTA1	-0.940724	0.00194623	0.00653557
RPS14	-0.940602	2.82842e-08	5.86898e-07
PRDX3	-0.939739	1.01151e-11	1.29606e-09
APOL1	-0.939259	0.0010453	0.0038626
PLEK2	-0.939211	2.66787e-05	0.000171401
KIR2DL4	-0.93891	0.000793234	0.00304591
HSPB7	-0.937903	0.00201654	0.00673306
CEACAM3	-0.937517	0.00245994	0.00798596
PGCP	-0.935916	1.28452e-08	3.10541e-07
ZBTB7C	-0.93562	0.00168668	0.00579496
PDCD1	-0.934979	0.0010453	0.00385011
CHRNA6	-0.933638	0.00241604	0.00784965
ORMDL2	-0.93352	1.6373e-13	5.50267e-11
NDUFA1	-0.933427	1.501e-11	1.70956e-09
PTPRC	-0.933061	3.93298e-05	0.000236452
RPS3A	-0.933039	1.39084e-05	9.80857e-05
SFT2D2	-0.931902	6.83516e-11	5.20921e-09
ACSL4	-0.93186	1.40837e-10	9.13704e-09
S1PR4	-0.930498	0.00015524	0.000763757
BFSP2	-0.930005	0.000105067	0.000550888
LOC374443	-0.929955	1.3608e-11	1.61259e-09
EEF1B2	-0.929314	1.03055e-08	2.65084e-07
TRAF3IP3	-0.928993	4.3273e-05	0.000255807
GPR115	-0.928967	0.00161063	0.00558988
MARCH1	-0.928693	0.000500369	0.00206524
GPR120	-0.92829	0.000108988	0.000569992
NDUFB3	-0.928034	5.15858e-10	2.45944e-08
RPGRIP1	-0.92717	0.000361934	0.00156375
BTK	-0.927075	2.63905e-06	2.46484e-05
ANXA2P3	-0.926203	0.000113213	0.000588633
HIST1H2AD	-0.925685	0.00300636	0.00947622
DNAJC12	-0.925167	6.69517e-06	5.33246e-05
RPL23AP82	-0.924468	1.50287e-09	5.64293e-08
AGRP	-0.924451	0.000294758	0.00131223
UQCRQ	-0.92434	4.93443e-08	9.19643e-07
APOBEC3F	-0.924318	9.89595e-07	1.09901e-05
UXT	-0.924189	1.17795e-10	7.89185e-09
CDH26	-0.923902	0.000610093	0.00245101
TLR1	-0.923639	5.70077e-06	4.64513e-05
TAGLN	-0.922591	0.00135591	0.00480843
NIPSNAP3A	-0.921899	6.48279e-08	1.14178e-06
PRR13	-0.921192	8.88168e-15	5.51768e-12
CALCRL	-0.920547	0.00130692	0.00466941
ZFAND1	-0.920065	3.24225e-11	3.04905e-09
RNASET2	-0.919039	5.10095e-07	6.3494e-06
C17orf87	-0.918828	0.000124577	0.000636262
SEP15	-0.91879	2.1297e-08	4.68466e-07
NBL1	-0.918789	2.41754e-05	0.00015759
FGL2	-0.918571	1.70421e-05	0.000116967
STX11	-0.918529	2.35766e-06	2.2315e-05
RPS27A	-0.918036	7.49077e-11	5.48458e-09
EPYC	-0.917353	0.000225004	0.00104504
HIST1H3H	-0.916791	7.2431e-05	0.000398847
MYO1A	-0.916783	0.000997404	0.00370968
NCF1C	-0.916728	9.10169e-05	0.000485289
C5orf62	-0.916544	0.000425998	0.00180256
COMMD1	-0.915567	3.57799e-09	1.13198e-07
FBXL13	-0.915496	9.10169e-05	0.000486048
PPCS	-0.915462	7.49077e-11	5.52404e-09
DUSP13	-0.914742	0.00135057	0.00479947
CD4	-0.914582	7.85146e-06	6.09477e-05
CYTIP	-0.913828	4.98865e-05	0.000290134
KCTD9	-0.913749	1.68161e-10	1.02603e-08
RGS13	-0.913271	0.000792175	0.00304241
FGG	-0.912401	0.000827837	0.00316337
ZNF215	-0.912086	0.00174844	0.00596815
TMEM59	-0.912015	1.6373e-13	5.41392e-11
IL23A	-0.91197	4.34629e-06	3.72662e-05
VAV1	-0.911789	3.08929e-05	0.000192796
OAF	-0.911753	2.94234e-05	0.000185889
KRT13	-0.911631	0.00102933	0.00380564
ASB2	-0.911365	0.00140657	0.00497947
IL16	-0.911045	3.51939e-07	4.67602e-06
ST8SIA4	-0.910158	1.88469e-05	0.000126766
BCO2	-0.910059	0.00224148	0.00739024
CCRL2	-0.909953	1.62017e-05	0.000112327
NINJ1	-0.909489	7.49077e-11	5.56406e-09
GEM	-0.909451	0.000541874	0.00221118
PDK3	-0.908717	8.48742e-08	1.43093e-06
SLC40A1	-0.908717	0.000192792	0.000916397
SH3BGRL3	-0.908419	8.28279e-12	1.11714e-09
ARPC3	-0.908208	1.51712e-14	8.40609e-12
IRF5	-0.907623	1.77311e-06	1.77493e-05
PRICKLE1	-0.906958	0.000659862	0.00261407
CYB5A	-0.905825	1.08721e-09	4.47566e-08
MS4A2	-0.905815	0.000281769	0.00126734
C1D	-0.905813	3.06341e-09	9.93718e-08
CKM	-0.905411	0.000254587	0.00116036
SLC46A2	-0.903808	0.00156906	0.00545579
MRPS6	-0.903631	1.17937e-09	4.67665e-08
FKBP11	-0.903216	2.91565e-07	3.99824e-06
GAPT	-0.902835	1.19228e-05	8.60363e-05
FMO4	-0.90249	3.98594e-07	5.21146e-06
SLC2A14	-0.90195	0.000679372	0.00268152
RPS3	-0.901883	1.53697e-07	2.31687e-06
ULBP2	-0.901781	0.00068612	0.0026926
EVI2B	-0.90162	1.39084e-05	9.83564e-05
C19orf33	-0.901456	0.000723565	0.00282012
CD79A	-0.90138	0.00295647	0.00936072
MRPS15	-0.900546	5.18181e-11	4.26636e-09
C2orf7	-0.900449	4.17458e-09	1.26415e-07
TMEM141	-0.900186	1.38172e-08	3.27476e-07
GIMAP7	-0.899138	1.46366e-05	0.000102762
IL27	-0.898587	0.00132929	0.00472628
RPS17	-0.897796	1.68161e-10	1.01996e-08
RPL24	-0.897785	1.49132e-06	1.53946e-05
B9D1	-0.897778	3.51939e-07	4.69122e-06
RPL27A	-0.897529	4.17458e-09	1.24213e-07
POU2F2	-0.897336	0.000610093	0.00244622
MRPL41	-0.896933	3.49072e-08	6.93442e-07
MYL6	-0.896436	1.98271e-08	4.42784e-07
NDUFB8	-0.896001	2.62003e-09	8.73386e-08
LSMD1	-0.895749	1.53697e-07	2.33058e-06
MRPS33	-0.895592	5.665e-09	1.5953e-07
RPS8	-0.895022	9.57114e-09	2.47126e-07
RPS13	-0.894983	3.91549e-11	3.49006e-09
DGAT2	-0.894755	0.00187815	0.00635904
EIF4EBP3	-0.894685	2.4946e-06	2.35135e-05
IL32	-0.893708	0.000248919	0.0011401
IRF8	-0.893591	0.00015524	0.000765594
WAS	-0.893512	4.84687e-06	4.07738e-05
ASB12	-0.89287	0.00255703	0.00826449
IL7	-0.892555	0.000425998	0.00179921
RHEBL1	-0.891964	2.18937e-05	0.000144508
SHBG	-0.891646	0.000461807	0.00192429
PLD1	-0.891548	0.000192792	0.000917247
HCP5	-0.891066	0.000832373	0.00317361
IL34	-0.890531	0.000832373	0.00317302
IFT20	-0.889991	3.74261e-08	7.36345e-07
FAM164C	-0.888873	5.22932e-05	0.00030131
SMPDL3A	-0.888805	9.68768e-06	7.20635e-05
GPR82	-0.887949	0.00305898	0.00962877
GNG11	-0.886703	0.00015524	0.000766332
TEKT3	-0.886382	0.000586523	0.00236048
SNORA53	-0.886332	0.000434988	0.00183228
OTUD1	-0.885921	7.65607e-09	2.04638e-07
CSF2	-0.885481	0.000837552	0.0031827
C19orf77	-0.884123	0.00232136	0.0076132
TLR7	-0.883415	0.000248919	0.00113705
PLTP	-0.88319	0.000130218	0.000657212
RTP4	-0.882918	0.000259628	0.00117679
FUNDC2	-0.882708	9.89595e-07	1.09545e-05
HSCB	-0.88263	1.59759e-08	3.68003e-07
ANXA1	-0.882476	0.000347371	0.00151682
LILRA2	-0.882029	7.5838e-05	0.00041427
UCHL1	-0.882022	0.000219197	0.00101899
PTPRCAP	-0.880138	6.91672e-05	0.000383035
BRP44	-0.880065	1.6373e-13	5.59439e-11
RPS20	-0.879189	7.93644e-14	3.38969e-11
TNFSF13B	-0.878632	0.000148597	0.000735309
ADAP2	-0.878394	8.48742e-08	1.43802e-06
RNF130	-0.878346	2.40642e-12	4.21659e-10
LAT2	-0.877793	2.22784e-06	2.13325e-05
TNFRSF1B	-0.877729	0.000210044	0.000982683
CMTM8	-0.877522	9.52308e-05	0.000505261
ISG20	-0.877245	1.19228e-05	8.59758e-05
FFAR3	-0.876868	0.00215491	0.00714272
HSD17B11	-0.876464	1.94578e-12	3.65968e-10
CETN2	-0.876279	1.26334e-07	1.99382e-06
SPR	-0.876172	1.76397e-09	6.36675e-08
CREBL2	-0.875625	2.2384e-09	7.69957e-08
HBXIP	-0.875049	9.57114e-09	2.48377e-07
TMEM40	-0.874423	0.00114233	0.00415154
PLXDC2	-0.874353	8.27699e-06	6.35055e-05
NDUFA4	-0.874022	9.10169e-05	0.000485163
COMMD6	-0.873733	1.76397e-09	6.44619e-08
C17orf44	-0.872972	4.34629e-06	3.7313e-05
COX17	-0.87296	2.00949e-11	2.11265e-09
BRI3	-0.872803	1.45347e-13	5.22764e-11
RNF148	-0.872734	0.000869601	0.00328621
HHEX	-0.87221	1.18104e-06	1.27501e-05
TMEM106C	-0.871996	6.34683e-06	5.08267e-05
TNFRSF11A	-0.871555	0.000969351	0.00360796
OBFC1	-0.871507	4.15648e-16	6.08657e-13
IRF4	-0.871037	0.000461807	0.00192939
SLC9A9	-0.870853	3.49072e-08	6.921e-07
C1orf151	-0.870789	2.40642e-12	4.28992e-10
PPAP2A	-0.870723	5.65835e-08	1.02114e-06
NME5	-0.870425	0.000259628	0.00117783
DIO3OS	-0.869807	0.000929917	0.00349354
REXO2	-0.869772	2.38788e-10	1.3412e-08
HSD17B14	-0.868098	2.63905e-06	2.45924e-05
FUNDC2P2	-0.867671	3.75115e-05	0.000226316
TRIM59	-0.867551	9.19405e-06	6.90177e-05
SNRPG	-0.867288	2.26233e-07	3.22084e-06
RPS10	-0.866252	2.79138e-06	2.56619e-05
TRPM2	-0.865677	1.98153e-05	0.000132324
HEXB	-0.86548	7.20647e-10	3.21873e-08
LDLRAP1	-0.86507	4.24068e-07	5.4747e-06
CXorf58	-0.864784	0.000899481	0.00338105
AQP3	-0.864692	0.00305898	0.00963617
IKBKE	-0.864474	1.49132e-06	1.54568e-05
TMEM126B	-0.863475	5.28459e-08	9.67316e-07
LOC257358	-0.863342	0.000259594	0.00118239
PIK3R5	-0.862785	0.000238621	0.00109685
IMPA2	-0.862763	1.07507e-05	7.89399e-05
EXOSC1	-0.862735	7.72825e-16	8.80205e-13
ATP5J2	-0.862227	7.79713e-07	9.05147e-06
LDLRAD2	-0.861819	0.00305898	0.00962286
TMEM42	-0.860742	6.91338e-07	8.16894e-06
PSMB10	-0.860408	1.91026e-09	6.79901e-08
C7orf68	-0.859937	0.0024038	0.0078372
GNAI1	-0.859893	0.00112665	0.00410548
NCF2	-0.859885	2.94234e-05	0.000186003
BLOC1S2	-0.85979	2.60454e-10	1.45097e-08
RPL35	-0.859554	5.40151e-06	4.45619e-05
UCP2	-0.859489	6.69517e-06	5.29543e-05
CCDC28A	-0.858639	2.2384e-09	7.72549e-08
EFNA4	-0.857519	5.40151e-06	4.47058e-05
MRPL34	-0.857502	8.50238e-10	3.66192e-08
CLLU1	-0.857107	0.000151877	0.000750635
CD109	-0.856897	0.00266725	0.00858149
BCAS4	-0.855832	2.66787e-05	0.000171993
CHCHD1	-0.854865	5.83425e-13	1.45863e-10
ATOX1	-0.854783	8.50238e-10	3.72451e-08
PTPRQ	-0.854768	0.00276948	0.00883003
MREG	-0.85476	0.000201247	0.000951512
SRD5A3	-0.85439	1.13413e-12	2.2795e-10
SERPINA3	-0.853514	0.00285707	0.00906559
MRPL13	-0.853384	1.98271e-08	4.43266e-07
SLC16A5	-0.852888	0.000201247	0.000950635
C12orf59	-0.852599	1.25529e-05	9.01394e-05
LRMP	-0.852504	4.12574e-05	0.000246163
TPK1	-0.851818	1.91026e-09	6.75212e-08
KCNE3	-0.851024	6.30471e-05	0.000354311
ANGPTL6	-0.850962	0.00063453	0.00253874
GSN	-0.850136	1.02062e-05	7.5564e-05
UBE2E2	-0.849786	1.04988e-06	1.14853e-05
SIGIRR	-0.848864	9.19405e-06	6.9195e-05
RPS6KA1	-0.848111	1.59759e-08	3.66767e-07
CMAH	-0.847861	0.000347371	0.00151585
C7orf58	-0.846661	0.000500369	0.00206899
DEF6	-0.846594	1.32143e-05	9.40975e-05
ROMO1	-0.846555	3.48786e-06	3.10215e-05
PRF1	-0.846544	0.00156906	0.00545856
GOLT1B	-0.846406	1.28452e-08	3.12383e-07
UTS2D	-0.845896	0.0010453	0.00384251
MT1X	-0.845593	0.00248888	0.00806075
SERPINB7	-0.844627	0.0029717	0.00937419
TLR4	-0.844619	0.000201247	0.000949541
EGOT	-0.844127	0.000253934	0.00115816
TNNC2	-0.843985	0.00112665	0.00409747
MYL12B	-0.843808	8.50238e-10	3.65424e-08
FFAR2	-0.843114	0.00285398	0.00908531
PTPN6	-0.840863	4.11471e-06	3.55781e-05
DDIT4	-0.840725	0.000377058	0.00162192
TMEM14C	-0.840435	1.59759e-08	3.66356e-07
C9orf116	-0.840273	0.000306864	0.00136376
MOV10L1	-0.839927	0.0010453	0.00385288
GPR87	-0.839599	0.00173728	0.00596183
PLAC9	-0.839382	0.00194623	0.00652809
C17orf91	-0.839192	3.30604e-07	4.44732e-06
SERF2	-0.838865	3.8653e-09	1.19341e-07
SUMF1	-0.838453	1.03055e-08	2.62124e-07
NDUFB5	-0.838286	1.40722e-06	1.47191e-05
CYB5R4	-0.83798	1.32762e-06	1.40732e-05
VPS29	-0.837386	3.06341e-09	9.84373e-08
NIT2	-0.837358	1.03055e-08	2.63104e-07
LPAR1	-0.837291	0.000741532	0.00288138
S100A13	-0.836428	0.00201654	0.00671993
GJA9	-0.836317	3.74868e-05	0.000226768
CSF2RA	-0.835724	0.000113971	0.000591222
RPP25	-0.835124	7.85146e-06	6.06949e-05
LILRB4	-0.834602	0.000113971	0.000590475
MRPL33	-0.834525	2.73728e-07	3.78657e-06
ATP5I	-0.834292	3.57799e-09	1.13373e-07
IL13RA1	-0.833521	1.32762e-06	1.40369e-05
CSTB	-0.833309	8.9691e-14	3.6054e-11
BET1	-0.832464	5.25075e-09	1.50764e-07
FBXO6	-0.832248	1.87775e-06	1.8615e-05
COX7C	-0.832129	8.50238e-10	3.70079e-08
PHF11	-0.83211	8.27819e-07	9.47578e-06
SEPT4	-0.832022	0.000270761	0.00122024
LOC100128076	-0.831869	0.00175574	0.00599008
TMEM219	-0.831482	1.28823e-10	8.46477e-09
ANKRD58	-0.831416	0.000377058	0.00162465
COMMD3	-0.831036	5.40151e-06	4.47781e-05
ARHGEF19	-0.831033	0.00116945	0.00424862
NPL	-0.830353	0.000124577	0.000634838
NTAN1	-0.830273	7.29681e-13	1.66213e-10
FLJ35776	-0.830017	1.62017e-05	0.000112176
CCDC23	-0.82949	1.00195e-09	4.19205e-08
AK1	-0.829122	3.8948e-06	3.42105e-05
RNF144B	-0.828907	1.88469e-05	0.000126849
SGMS2	-0.827869	0.00285707	0.00906419
SLC2A3	-0.827865	0.00224148	0.00736655
C11orf31	-0.827674	4.93443e-08	9.31499e-07
CXCR4	-0.827666	5.76385e-07	7.06727e-06
TBC1D8	-0.827391	0.000259628	0.00117627
LYRM1	-0.82731	5.10095e-07	6.36873e-06
SIGLEC8	-0.826384	0.00174844	0.00597212
C17orf79	-0.826258	2.2384e-09	7.73852e-08
MMD	-0.82623	2.06812e-09	7.22291e-08
LDOC1	-0.825971	2.53981e-05	0.000164514
COX5B	-0.825295	1.44004e-07	2.21805e-06
RAB3IL1	-0.82522	1.07507e-05	7.88269e-05
GFI1	-0.825021	0.00112665	0.00410621
TRAPPC3	-0.824958	1.65497e-11	1.80471e-09
SPA17	-0.824324	0.000148597	0.000735842
LOC100302650	-0.824294	7.5838e-05	0.00041416
HIST1H4D	-0.82393	0.00133059	0.0047301
COMTD1	-0.823904	5.10095e-07	6.39991e-06
CHCHD7	-0.823521	9.83872e-11	6.81431e-09
SQSTM1	-0.82247	1.26334e-07	1.97708e-06
LAX1	-0.821704	0.00258659	0.00833113
LTBR	-0.82169	0.00015524	0.000765226
DCBLD2	-0.821577	0.00232136	0.00760955
ANXA11	-0.821273	9.83872e-11	6.86067e-09
UAP1	-0.821129	2.40642e-12	4.18086e-10
FAM49B	-0.821106	1.1074e-07	1.78622e-06
NOP10	-0.820684	1.18293e-07	1.87848e-06
RPS29	-0.820677	1.88469e-05	0.000126807
BOLA3	-0.820198	4.50742e-09	1.33729e-07
NUDT14	-0.819962	7.79713e-07	9.01573e-06
LSP1	-0.819834	0.00077075	0.00297405
RNF7	-0.819825	8.28279e-12	1.12454e-09
IFITM1	-0.819556	0.00224148	0.00737719
SELT	-0.818989	1.86641e-07	2.73115e-06
CHKB	-0.81892	5.76385e-07	7.0715e-06
ZNF511	-0.81887	9.15513e-12	1.18791e-09
RNASE4	-0.818865	5.11711e-06	4.27315e-05
FAM198B	-0.818468	0.00187815	0.00635694
UQCRH	-0.818	4.17458e-09	1.24033e-07
SLC29A3	-0.817561	2.95199e-06	2.69092e-05
NFU1	-0.817458	1.28823e-10	8.51939e-09
C4orf52	-0.817311	3.03459e-08	6.2462e-07
KRT32	-0.817162	0.00284458	0.00905679
P4HA1	-0.816891	2.56932e-07	3.59302e-06
EPHX3	-0.816731	0.00116945	0.00424485
DRAM2	-0.816422	8.20634e-11	5.96589e-09
ELOVL3	-0.816168	0.00262046	0.00843492
FAM162A	-0.815293	9.32603e-07	1.04649e-05
STAC3	-0.815236	1.32143e-05	9.37718e-05
KIAA1598	-0.815051	0.000969351	0.00361716
CLIC1	-0.814853	1.18293e-07	1.88725e-06
SYTL3	-0.814078	0.000169361	0.00082024
ATP5L	-0.814038	6.93675e-08	1.21443e-06
NEK7	-0.814012	5.28459e-08	9.70783e-07
ITGAE	-0.813435	4.3273e-05	0.000256473
RAP1B	-0.813242	8.50238e-10	3.64659e-08
MXRA8	-0.812792	0.00156906	0.0054632
ARHGAP8	-0.812651	0.00280721	0.00894337
ATG4A	-0.812612	8.9691e-14	3.75256e-11
HEPH	-0.812603	0.00305898	0.0096273
ATP5E	-0.812462	2.42204e-09	8.26193e-08
TMED3	-0.812418	4.50742e-09	1.32388e-07
ATP6V1E1	-0.812255	5.52528e-12	8.32896e-10
CECR1	-0.811131	0.000347371	0.00151617
RPL41	-0.81013	1.53697e-07	2.32028e-06
C11orf1	-0.809935	1.34894e-07	2.10301e-06
CALHM2	-0.809824	3.30604e-07	4.44149e-06
SLC44A1	-0.809523	8.72418e-06	6.61934e-05
TAX1BP3	-0.809445	1.71725e-08	3.8944e-07
OSTCL	-0.809393	2.26233e-07	3.22756e-06
NCRNA00116	-0.808685	1.62017e-05	0.000111798
C8orf40	-0.808156	4.50088e-12	7.15291e-10
SNHG6	-0.808129	4.86554e-09	1.41087e-07
SEPT1	-0.807824	1.98821e-06	1.93912e-05
IFI27L2	-0.80703	4.60645e-08	8.76038e-07
C7orf59	-0.806718	9.89595e-07	1.09722e-05
PPP2R3A	-0.8065	8.3105e-05	0.000448234
SLC6A3	-0.805741	0.000819031	0.00313147
ARHGAP9	-0.805558	2.41754e-05	0.000158092
ALDH3B1	-0.804952	2.41754e-05	0.000158143
SEC11C	-0.804321	1.70421e-05	0.000116771
RPL37A	-0.803446	5.25075e-09	1.49924e-07
B2M	-0.802761	3.29978e-06	2.96966e-05
SLC39A14	-0.802151	0.000333351	0.0014587
GTF3A	-0.80214	3.74261e-08	7.37761e-07
SRXN1	-0.802125	4.93443e-08	9.22158e-07
KCNE2	-0.802117	1.79232e-05	0.000121912
IL2RB	-0.80181	0.00168668	0.00581347
NDUFB1	-0.801614	1.62017e-05	0.00011176
DGKE	-0.800856	0.00121373	0.00437307
TMEM139	-0.800285	0.00130692	0.00465239
NAAA	-0.800251	9.89595e-07	1.09368e-05
ALG14	-0.800212	1.91026e-09	6.87058e-08
PYROXD1	-0.799402	2.1297e-08	4.69473e-07
BET3L	-0.799347	0.0019075	0.00642658
HAAO	-0.799196	0.000162158	0.000793982
UROS	-0.799182	1.28452e-08	3.09083e-07
CNN2	-0.798998	0.00232136	0.00761077
IL4R	-0.798836	0.000142219	0.000710954
TSC22D3	-0.798055	3.48786e-06	3.09142e-05
IFIT1B	-0.797849	0.000695198	0.00272562
MED18	-0.797598	2.82842e-08	5.89283e-07
BMF	-0.796897	0.000741532	0.0028874
HEBP1	-0.796665	2.60454e-10	1.44313e-08
ATF7IP2	-0.796077	0.000713333	0.00279458
CD302	-0.796004	6.69517e-06	5.34076e-05
APOBEC3C	-0.795656	3.57248e-05	0.000218625
ECHS1	-0.795378	8.15375e-13	1.7783e-10
STAT6	-0.795351	1.54005e-05	0.000107098
SLC17A9	-0.795332	0.00044357	0.00186192
CSF3R	-0.795217	0.000461807	0.00193412
APOBEC3D	-0.794663	5.74355e-05	0.000327261
OAZ1	-0.793506	1.40837e-10	8.96678e-09
RHOG	-0.793044	1.2332e-11	1.50487e-09
KCNK13	-0.792971	0.000184667	0.000883719
DPM3	-0.792641	1.40722e-06	1.47492e-05
IL10RB	-0.792519	5.52528e-12	8.26816e-10
GCNT3	-0.792312	3.72782e-05	0.000226375
CNIH4	-0.791879	2.40642e-12	4.25294e-10
PLP2	-0.791577	0.000392763	0.00167332
ANKRD45	-0.790431	0.00285707	0.00909233
C1orf228	-0.789857	0.000480732	0.00199908
C1orf31	-0.789675	1.10934e-08	2.80772e-07
CDA	-0.789344	0.000586523	0.00236932
PCTP	-0.788753	3.57799e-09	1.12504e-07
SLC1A5	-0.78807	0.000124577	0.000633735
LOC344967	-0.787856	0.000113971	0.000590326
FHIT	-0.787539	0.000898477	0.00338721
ANXA7	-0.787142	2.33182e-13	7.13501e-11
ZNF32	-0.787133	3.29978e-06	2.94894e-05
LOC100130581	-0.786889	9.68768e-06	7.2326e-05
PLCG2	-0.786684	0.000130218	0.000657374
CCDC74A	-0.786156	0.000130218	0.000659974
CUTC	-0.786116	7.29681e-13	1.68081e-10
PPA1	-0.785969	1.19386e-08	2.95954e-07
HCG11	-0.785871	0.000969351	0.00361781
RPL12	-0.785775	2.82842e-08	5.87492e-07
ZC3H12A	-0.785712	0.000563792	0.00228245
RPL5	-0.78543	6.1252e-07	7.38664e-06
C1orf212	-0.784465	1.62842e-09	6.05886e-08
ZNHIT1	-0.784015	2.56932e-07	3.57352e-06
SNX20	-0.783835	0.000500369	0.00206317
CD44	-0.783594	0.00068612	0.00270399
RILP	-0.78346	2.22784e-06	2.12828e-05
FAM46C	-0.783391	0.000361934	0.00156904
PKIG	-0.783223	8.27699e-06	6.35293e-05
C11orf10	-0.783178	5.68496e-11	4.53492e-09
TXNDC9	-0.783029	4.86554e-09	1.40689e-07
NUDT13	-0.782333	0.000219197	0.00102085
MICA	-0.781225	0.000461807	0.00192703
MICB	-0.78121	0.000832373	0.00317125
MLF1	-0.780758	0.00121373	0.0043654
RPL37	-0.780648	2.94284e-13	8.26454e-11
ACOT4	-0.780553	0.00121373	0.00438231
ZC3H12D	-0.78047	0.000480732	0.00199181
ATP5O	-0.780309	2.26233e-07	3.24109e-06
C9orf89	-0.780302	3.06341e-09	9.92148e-08
GIMAP2	-0.780291	1.67401e-06	1.69896e-05
TGDS	-0.78014	1.03648e-07	1.68642e-06
C10orf84	-0.779971	1.10934e-08	2.81119e-07
RHBDF2	-0.779689	0.00044357	0.0018623
MORN2	-0.779642	2.80195e-05	0.000178283
C10orf54	-0.778136	5.74355e-05	0.000327079
NEU1	-0.777776	1.76397e-09	6.40055e-08
UQCR10	-0.777742	4.93443e-08	9.2048e-07
ARHGAP4	-0.777473	2.94234e-05	0.000186463
FAM113B	-0.777294	2.18937e-05	0.000144835
ADI1	-0.777062	1.28452e-08	3.15754e-07
ATP5H	-0.77698	6.58905e-09	1.81075e-07
SFXN2	-0.776738	3.40406e-05	0.000208942
SERHL2	-0.776088	0.00100667	0.00372792
ZFAND2A	-0.775714	3.57248e-05	0.00021707
ATP6V1F	-0.775543	1.91026e-09	6.84656e-08
SSR3	-0.775027	3.37328e-10	1.76869e-08
PTPN7	-0.774996	8.3105e-05	0.000447998
COX7A2	-0.774805	0.00044357	0.00186727
FGF7	-0.77454	0.00100667	0.00373602
CORO1A	-0.774517	8.27699e-06	6.37441e-05
MRPL22	-0.77388	2.73728e-07	3.78913e-06
ARG2	-0.773512	2.95199e-06	2.70294e-05
TMEM126A	-0.773502	7.93711e-08	1.34812e-06
PDIA5	-0.773214	0.000238621	0.0010971
MDH1	-0.772884	4.72146e-11	4.01638e-09
SNHG8	-0.772671	2.41118e-07	3.39737e-06
ATP5J	-0.772606	5.25075e-09	1.50976e-07
SLC25A19	-0.772302	5.15858e-10	2.4424e-08
MPZL2	-0.771837	0.00116945	0.00424035
C15orf57	-0.771477	2.82842e-08	5.92293e-07
MYO1H	-0.771429	0.000479637	0.00199534
PLAG1	-0.770585	0.00208914	0.00693705
YPEL5	-0.770456	3.57799e-09	1.11647e-07
HRCT1	-0.770443	0.00140657	0.00497174
RIN2	-0.770409	2.1048e-06	2.03732e-05
HPCAL1	-0.770338	6.11036e-09	1.70665e-07
GEMIN6	-0.769743	1.10934e-08	2.79736e-07
IMMP2L	-0.769615	9.32603e-07	1.0442e-05
STX3	-0.769491	8.48742e-08	1.42507e-06
IFNGR1	-0.769471	7.34265e-07	8.61165e-06
PNKD	-0.769193	2.38788e-10	1.34489e-08
SLC22A18AS	-0.768418	0.00194623	0.00652382
STXBP2	-0.768274	8.69772e-05	0.000465809
SELPLG	-0.767847	0.000238621	0.00109563
HSPC157	-0.767614	2.26233e-07	3.23206e-06
PSAP	-0.767577	1.53919e-10	9.59119e-09
WDSUB1	-0.766751	8.20634e-11	5.86196e-09
DNASE1L1	-0.766268	2.95199e-06	2.70053e-05
HLX	-0.766043	6.30471e-05	0.000354408
IRAK3	-0.765536	0.00116945	0.0042426
C6orf57	-0.765469	0.000119164	0.000612584
DNAJC19	-0.765179	3.51939e-07	4.68512e-06
PMFBP1	-0.764781	0.000169361	0.000821404
ARL6IP5	-0.764658	5.68496e-11	4.55264e-09
RPL26L1	-0.764426	1.53697e-07	2.32199e-06
POMP	-0.764367	1.53697e-07	2.32371e-06
PLK3	-0.763992	3.03459e-08	6.20261e-07
GLRX3	-0.763894	7.34265e-07	8.62152e-06
POLB	-0.76313	8.78732e-07	9.92555e-06
TRMT112	-0.762988	1.62842e-09	6.00437e-08
ITPR1	-0.762558	1.39084e-05	9.82547e-05
C1orf85	-0.762243	6.50798e-07	7.79778e-06
TIMM8B	-0.761787	6.01802e-05	0.000340065
MTHFD2	-0.761568	4.3273e-05	0.000256325
THY1	-0.761568	0.000136095	0.000682841
ARRB1	-0.76083	0.000192792	0.000920023
C20orf197	-0.760369	0.000832373	0.00317774
PIGC	-0.760173	2.21297e-11	2.27981e-09
XBP1	-0.759634	4.60645e-08	8.71993e-07
CD63	-0.759588	1.70421e-05	0.000117084
MRPL17	-0.758961	5.28459e-08	9.72526e-07
C17orf37	-0.758906	2.79138e-06	2.58124e-05
C12orf57	-0.758869	0.000162158	0.000795502
TMEM49	-0.758728	1.28823e-10	8.43773e-09
VKORC1	-0.758714	3.06341e-09	9.85918e-08
CIB1	-0.758409	3.74261e-08	7.39183e-07
MTCP1NB	-0.757952	1.84543e-08	4.15749e-07
OR13A1	-0.757604	0.00142663	0.00502102
TICAM2	-0.756789	1.58017e-06	1.61089e-05
UBL5	-0.756703	1.02062e-05	7.52379e-05
LOC100128292	-0.756199	9.19405e-06	6.93733e-05
SDC4	-0.755993	0.00140657	0.00496148
GYG1	-0.754087	1.74978e-07	2.59755e-06
RPL13A	-0.753278	2.08302e-05	0.000138469
APITD1	-0.75299	2.82842e-08	5.92899e-07
GPRC5D	-0.752757	0.000202892	0.000956645
C8orf59	-0.752547	1.1074e-07	1.79044e-06
AGPHD1	-0.752029	0.000377058	0.00162499
LPCAT2	-0.751533	3.40406e-05	0.000209318
CITED4	-0.751313	0.00156906	0.00547342
C1orf57	-0.751131	9.89595e-07	1.09782e-05
GPBAR1	-0.751079	0.000361934	0.00156838
IFITM3	-0.750847	0.000238621	0.00109858
HS1BP3	-0.750722	1.84324e-13	5.99814e-11
TM6SF1	-0.750462	6.91672e-05	0.000382415
QPRT	-0.750209	0.000104209	0.000547653
ATP5G1	-0.750131	9.68768e-06	7.25638e-05
POLR2K	-0.750128	1.38661e-09	5.30354e-08
ALPK1	-0.750021	0.00285707	0.00909374
AIM1L	-0.748417	0.00308448	0.00968229
TCEB1	-0.7484	3.56367e-11	3.26156e-09
TOMM22	-0.748398	2.4946e-06	2.33631e-05
NDUFB9	-0.747946	1.13225e-05	8.24591e-05
DYNLT3	-0.747719	1.71725e-08	3.9117e-07
ANKH	-0.747502	6.69517e-06	5.347e-05
FAH	-0.747379	2.63566e-08	5.57047e-07
PTS	-0.746614	2.95199e-06	2.69572e-05
LRRC23	-0.745977	6.91672e-05	0.000383657
WTAP	-0.745809	9.19405e-06	6.89924e-05
GAS6	-0.745729	7.85146e-06	6.09016e-05
CCDC110	-0.74553	0.000361934	0.0015717
FCGRT	-0.745429	6.93675e-08	1.20927e-06
ATF5	-0.745333	6.50798e-07	7.80691e-06
NAA20	-0.744724	2.18854e-10	1.25327e-08
SNRPE	-0.744397	4.3273e-05	0.000255955
GIMAP6	-0.743618	8.72418e-06	6.63161e-05
TRIM38	-0.743283	0.00044357	0.00186116
GHITM	-0.743	5.83425e-13	1.44106e-10
SCOC	-0.742927	3.30604e-07	4.41832e-06
FAU	-0.742896	3.03459e-08	6.22122e-07
ICOSLG	-0.742866	0.0010453	0.00385426
MRPL48	-0.742371	1.18104e-06	1.27233e-05
WDR78	-0.741728	0.00187815	0.0063329
LOC388789	-0.740862	2.56932e-07	3.59793e-06
AFMID	-0.740722	1.04988e-06	1.15532e-05
JUNB	-0.740662	0.000563792	0.00228606
FAM114A1	-0.740076	2.53981e-05	0.000164722
AGTRAP	-0.740052	4.24068e-07	5.50591e-06
BLOC1S1	-0.740006	4.12574e-05	0.000246882
C20orf199	-0.739811	0.000210044	0.000988776
CAPG	-0.739592	5.11711e-06	4.29238e-05
PDCD10	-0.739541	2.91565e-07	3.98225e-06
C2orf28	-0.739375	3.30604e-07	4.4444e-06
HLA.DOB	-0.739196	0.00285707	0.00907964
ATP5EP2	-0.738715	3.74577e-07	4.94157e-06
ATF3	-0.738282	0.000319854	0.00141322
TOMM5	-0.73817	2.1048e-06	2.03061e-05
LAD1	-0.737614	0.00259068	0.00834301
CHMP5	-0.737492	2.73728e-07	3.79939e-06
SEPT7L	-0.737236	0.00255703	0.00826319
RPL38	-0.736791	6.58905e-09	1.79392e-07
PHF5A	-0.736521	7.79713e-07	9.0005e-06
RPS16	-0.736377	1.98153e-05	0.000132453
IKBIP	-0.73561	3.98594e-07	5.20814e-06
PFDN4	-0.7356	5.4228e-07	6.68909e-06
MT2A	-0.735568	0.00187815	0.00634856
C11orf59	-0.735479	1.28452e-08	3.14999e-07
RPS27	-0.735085	3.93298e-05	0.000236313
TMEM14A	-0.734773	4.34629e-06	3.71419e-05
ALG5	-0.734254	0.000176861	0.000853937
TINAGL1	-0.734243	0.00100667	0.00372725
ABCG1	-0.734209	0.000259628	0.00118228
PSMA5	-0.733514	4.74136e-10	2.30338e-08
ZNF593	-0.733111	4.84687e-06	4.07404e-05
ZP3	-0.733041	0.00168668	0.00579205
PDK1	-0.731831	3.08929e-05	0.000193326
CRYAB	-0.731034	0.00316468	0.00990672
POLR2L	-0.730909	2.1048e-06	2.03925e-05
SMPD2	-0.730781	2.63566e-08	5.53623e-07
LGALS9	-0.730268	0.000108988	0.000568976
LPAR5	-0.730073	0.000832373	0.00317243
SLC22A4	-0.730032	0.000333351	0.00145964
WIPI1	-0.729692	9.89595e-07	1.09132e-05
RPS26	-0.729406	2.66787e-05	0.000171186
TRUB1	-0.729241	4.86554e-09	1.40888e-07
MRPL51	-0.729124	2.62003e-09	8.74809e-08
RPL23	-0.728839	1.00195e-09	4.15811e-08
RBM47	-0.728778	0.000898477	0.00338224
RHBDL2	-0.728461	1.46366e-05	0.000102481
RPSA	-0.728184	7.4466e-06	5.79805e-05
NDUFAB1	-0.728117	1.67401e-06	1.69309e-05
GBA	-0.727737	2.28705e-08	4.9721e-07
MED31	-0.727531	0.000176861	0.000851331
TCTEX1D2	-0.727347	5.70077e-06	4.64698e-05
TRAPPC2L	-0.726914	2.18937e-05	0.000144183
COQ10B	-0.726846	6.20159e-14	2.88952e-11
NDUFA6	-0.726124	6.91338e-07	8.19255e-06
MRPL43	-0.725113	1.18293e-07	1.87994e-06
DDT	-0.725061	1.48592e-08	3.5055e-07
PTPN2	-0.724809	2.62003e-09	8.71969e-08
SPATA8	-0.724673	0.000233514	0.00107724
CD58	-0.724175	0.000176861	0.000853133
HEXA	-0.723908	1.08721e-09	4.45776e-08
PHYH	-0.723869	1.04988e-06	1.15099e-05
TMBIM1	-0.723751	7.4466e-06	5.79585e-05
NRP1	-0.723423	0.000713333	0.00278819
DNAJC15	-0.723086	0.000176861	0.000852331
PROS1	-0.722944	0.00100667	0.00372994
SKAP2	-0.722413	0.00174844	0.00597113
RPL32	-0.722374	2.79138e-06	2.56734e-05
CYBB	-0.721649	0.00077075	0.00297798
FAM70B	-0.721529	2.41754e-05	0.00015774
THOC7	-0.721349	1.65497e-11	1.81436e-09
GCH1	-0.720931	0.000461807	0.00193136
DYNLL1	-0.720647	1.48592e-08	3.49745e-07
FAM165B	-0.720239	1.2523e-06	1.34275e-05
RPS25	-0.719832	2.82842e-08	5.86304e-07
CARD6	-0.719128	0.00077075	0.00298022
HDDC2	-0.718683	4.59015e-06	3.90792e-05
C2orf76	-0.718362	5.4228e-07	6.72145e-06
C1GALT1C1	-0.71794	1.68161e-10	1.03527e-08
AP3S1	-0.71774	7.75254e-15	5.12693e-12
C9orf3	-0.717488	4.98865e-05	0.000290217
CPVL	-0.716014	0.000130218	0.000659648
RNASEK	-0.715752	1.65497e-11	1.82411e-09
RFK	-0.715665	2.91565e-07	3.97696e-06
LOH12CR2	-0.715335	0.000713333	0.00278925
UBE2B	-0.715281	8.50238e-10	3.61633e-08
ARHGAP18	-0.715249	1.07507e-05	7.90815e-05
ITM2B	-0.715035	4.79729e-07	6.05972e-06
ITGAM	-0.714972	0.0024038	0.00783097
FAM124A	-0.714946	0.000586523	0.00236839
DBNDD2	-0.714141	0.000392763	0.00167681
TMEM111	-0.713943	4.30043e-11	3.73573e-09
TMEM179B	-0.713457	1.48592e-08	3.46562e-07
SNAI3	-0.71333	0.00201654	0.00671556
WNT5A	-0.713117	0.000282334	0.00126517
MOSPD1	-0.711651	6.83516e-11	5.26796e-09
IAH1	-0.711605	3.30604e-07	4.43567e-06
TMEM182	-0.711575	4.11471e-06	3.54883e-05
ACY1	-0.711538	2.2384e-09	7.75159e-08
DNAJB9	-0.711267	1.32762e-06	1.40659e-05
NUDT2	-0.711184	0.000259628	0.00117757
CST2	-0.711044	0.000818092	0.00312847
GLA	-0.710835	1.32871e-14	7.56661e-12
PCBD1	-0.709708	2.1297e-08	4.69978e-07
NME2P1	-0.709696	3.48786e-06	3.1035e-05
MCEE	-0.709367	6.91338e-07	8.19729e-06
DPY30	-0.709291	1.98271e-08	4.44235e-07
SHFM1	-0.709007	1.03055e-08	2.6245e-07
EDEM2	-0.709006	3.57799e-09	1.13024e-07
PIK3IP1	-0.708912	7.2431e-05	0.000398312
CTSD	-0.708874	7.34265e-07	8.63636e-06
ZNF467	-0.708495	0.000219197	0.00101876
SERTAD1	-0.708222	0.000162158	0.000792657
CYBRD1	-0.708141	0.00015524	0.000766516
RPS10P7	-0.707872	6.30471e-05	0.000353536
[truncated: 4,568 more rows]

## Sheet: Genes OE- TumHIGH cells&tissues
Genes over-expressed (OE) in TumHIGH GBM cells as well as tissues
Gene
CALM1
C1orf61
PTN
HNRNPH1
SMAD5
NOVA1
PHF14
SET
HNRNPA2B1
EWSR1
UBE2G2
LENG8
POGZ
ATN1
PTAR1
HP1BP3
MAPK1IP1L
PTPRZ1
LARS
CS
HNRNPUL1
RBBP6
DDX6
SF1
MLL5
REV3L
KTN1
CASP2
JMJD1C
MLL3
MKLN1
SF3B1
IPO9
SOX4
KBTBD2
WASH7P
DDX3X
KIF1B
SRRT
WASF3
ZNF814
LUC7L2
TOP1
NFIB
RRN3
ANP32E
DHX36
ZNF638
BIRC6
FXYD6
TSPAN3
CCDC47
CAMK2D
SMG7
PTPRS
FOXJ3
UBE3A
CELF1
POM121C
TANC1
CHD6
POM121
BRD4
AFF4
KDM5B
PRKDC
AP1G1
PCM1
SMEK2
SETD5
HELZ
RSF1
TCF3
BRD8
SECISBP2
NKTR
SRRM2
USP47
PHF21A
SART3
USP42
RAVER1
INO80D
TRRAP
ITPR2
TP53BP1
REST
SNW1
LUC7L
SCRN1
NIPBL
FAM160A2
TUBGCP4
PTPN11
RORA
ZC3H7A
SPG11
UBN2
SPEN
NFIA
PKD1
RBM5
NONO
ELAVL1
NCL
NUFIP2
BAZ2B
PKN1
RAB5A
CDCA7L
BRD2
NCOR1
SOX2
PUM2
AKAP8
CCDC80
THOC2
HTT
ACIN1
EGFR
PLXNA3
KIF2A
NUP153
SRCAP
ARID1B
LSG1
FMNL2
CBX5
ANKRD36B
ZNHIT6
BOD1L
TJP1
KLF3
RBM33
EEF2
RBM12
ZNF43
MACF1
AASS
SFPQ
NUP188
SETD2
UPF3A
TCF4
RASSF2
MLL
ATP1B2
HERC2P2
FNBP4
IRS2
CDC42BPA
SBF2
WDFY3
PHF3
ILF3
CDK10
TUBB2B
FAM120B
CPSF2
TNRC18
MCM7
CCDC124
CBS
HMG20B
EZH2
SENP7
C12orf51
MIB2
ROBO1
HERC2
TLK1
TAOK3
TP53
HIPK1
CHKA
ANP32A
DVL3
MLL4
HIPK2
FAM110B
NFIX
TRIM28
KDM3A
UBR4
DENND4B
LRP1B
TTLL5
ANKS3
SETBP1
RAF1
ZNF462
FAM111A
GATAD2A
CWC22
SMAP1
CLCN6
EYA3
CEP350
PCDH17
WIZ
IWS1
SLC39A10
MARCKSL1
CLCN3
HNRNPD
CRKL
SPRED2
BCHE
UBIAD1
MAP4K3
TUG1
ZNF292
SMARCA4
TRIM33
DLGAP4
TOP2B
HNRNPR
ANKRD17
PTPN13
FRS2
WNK3
PSIP1
MED13L
ZNF192
AAAS
DOT1L
LRRN1
BCAN
TBC1D5
NBPF14
JAG1
CDC5L
BAZ1B
TNK2
CKB
KPNB1
ZNF780B
NBPF10
USP48
STK36
ZNF384
CCNK
NASP
E4F1
NBAS
FAM178A
SSRP1
ZNF805
LCLAT1
SMARCC2
GPR56
PTPN23
ATXN2L
ACTN4
ARID1A
ITGA7
SMARCA5
USP24
ZNF326
TOX4
RIC8B
KIAA0947
DHX33
GATAD2B
PPP2R1A
IQCE
LATS1
CHEK1
SRGAP2
DHX30
FAM179B
USP10
SECISBP2L
FTSJ3
NSD1
GLI2
KIF21A
SORBS1
CLASP1
GIT1
CUL4A
USP8
KIAA1109
GBA2
EHMT1
SYT11
UBAP2L
FAM160B2
ARIH2
CUL3
AXIN1
ENAH
WEE1
RAB11B
DNMT1
ZEB1
ATP2A2
PPP1R10
CIC
QRICH1
CPSF3L
POGK
ICK
PDS5B
BARD1
REV1
CPSF6
TRIM24
SH2B1
PABPC1L
BCLAF1
NF1
LETM1
DTX3
EPN2
NUP93
RAD18
PRPF6
C5orf42
NFIC
DPP6
RBM19
GDI1
PDCD7
GLG1
PGAP1
TEAD1
PPARGC1A
NCKAP1
MGRN1
DYNC1H1
UNC80
HERC1
MARK3
NBPF1
EXOSC10
TTC28
SNRNP200
ZNF146
KAT2A
C14orf102
MTMR3
WDR3
FAM48A
KHNYN
AATF
TUBB2A
KLHDC5
LMF1
HECTD1
CBFA2T2
MYO5A
FNBP1L
SAMD4A
LIMCH1
ZMYND8
ARHGEF12
SAP130
DHODH
EIF4H
MAP4K5
JARID2
TRIM9
MPDZ
LOC100129034
HEATR5B
NIN
FAM5C
PCIF1
MUDENG
MAGI2
KNTC1
ANKRD13C
PCDH9
NOC2L
HNRNPM
ZNF337
TCF12
DIDO1
NKIRAS2
MTMR1
TNKS
CCDC88A
TNRC6C
MAGI1
ZNF776
EIF4G3
DHX9
NDOR1
CHD3
GSPT1
ZNF254
ZKSCAN1
FUS
ARHGAP42
RNF216
TRIM37
DMTF1
ZNF532
VPS37B
RABGAP1
NAV1
MAPT
SF3B3
ADAR
ZNF621
GFM1
MDN1
MYH10
PRPF8
TARDBP
DCAF7
RUNDC1
PTCH1
HOXA7
NUCKS1
GPSM2
SYNRG
STAG2
NR2C2
ZNF862
CHERP
ROCK2
SEPT10
ZC3H4
ZNF559
TAF2
DMPK
PAPOLA
CIRBP
PTBP1
SRBD1
TTYH3
FASN
DST
CDK11B
MYO10
DHX38
POLR3E
SIN3A
LSAMP
GRIK5
ARFGAP1
NOTCH2
EXOC7
RPRD2
SEPT8
JAKMIP2
LPHN3
ZXDC
SIN3B
AFG3L2
NHSL1
CHD9
ZNF521
ACTN2
NLGN4X
ARNTL
NPTXR
ZNF493
ASCL1
TNRC6B
PIP5K1C
ZNF414
DDX19A
CASC3
SMARCC1
SLITRK2
WHSC1L1
DPY19L3
NUMA1
CLUAP1
ZNF131
DPP8
RNF123
ZNF75A
AARS
RALGAPB
YES1
CD82
MYBBP1A
RNF168
BMPR2
PHGDH
INPP5E
NCBP1
AQR
IKBKAP
CPEB4
DPF2
MBD1
SYNCRIP
COG1
RBM28
RING1
RRM1
RBM4B
NRXN1
PRR14
CTNND1
CDYL
CENPB
EPC2
RFX4
LRRTM3
PCDHB13
ARHGEF7
ANAPC1
PUM1
UPF2
CLIP2
CDH2
DNAJB5
ATXN1L
ZNF227
MGA
INTS1
CDK14
INPPL1
OPHN1
PIP4K2B
PLCE1
FYN
REPS1
SF3B2
FAT3
FIGN
RHOBTB3
VASH1
TRAP1
TRIB2
SLC4A8
MIER2
VRK1
GOLM1
ZNF568
GPATCH8
CEP170
LEMD2
NCOA3
SART1
CREBZF
NAV2
DMAP1
SLC25A44
VSIG10
NUP214
DUS3L
OSBPL2
EFTUD2
ATXN2
KCTD15
EPS15L1
SPTAN1
OLIG1
CSNK1E
CIZ1
PIPOX
NEO1
CRK
CLEC16A
CRTC3
C19orf6
RNF38
SOX9
FERMT2
STX6
MARCH5
HCFC1
UBE2O
RANBP3
CREBBP
CLSPN
KHSRP
FBXO11
EEFSEC
REPIN1
CABIN1
RBM10
ZNF91
PPP2R5C
C9orf86
PIAS4
TLN2
ZHX3
SUPT16H
LSM14A
PAPD7
PHC1
MBD5
DIP2B
RFX7
SMAD1
AP3D1
TSR1
CDC7
PIGQ
TNPO1
ARMC5
KDM1B
GTF2I
ARID4A
SAMD4B
XPO6
DENND2A
ZNF664
MED26
GAPVD1
WHSC2
PEG3
IGF1R
CCDC93
CNNM3
TET3
PER1
PCDHGC3
PRR12
ALMS1
RNF40
PCF11
ZFYVE20
OSBP
SOS2
APC
RSPRY1
ZNF608
LRP1
C1orf96
CC2D1A
KIAA1958
MYO6
C17orf85
SOCS4
RBM23
ATXN1
AKT2
BAP1
CHD4
CTU1
FBXW11
FOXK1
POLR1A
SENP6
SPAG9
GLYR1
KIAA1967
ZNF260
DOHH
HEATR5A
CLSTN1
KDM3B
QKI
NES
HKR1
RERE
PRIC285
BCR
ZNF583
ZNF587
FMNL3
SUPT6H
ARHGAP21
VPS52
PSME3
DDX42
C18orf1
ARAP2
PGGT1B
KANK1
MED12
CPSF7
PCNXL3
CLIP3
NBR1
BCL9
PHF12
SMCR7L
WDR82
RBM6
SUV420H1
MAGED1
RANBP10
CTCF
ASCC3
ZNF318
JAM3
MTBP
XAB2
PCDHB10
LRRC58
MSL1
MSI2
OSBPL6
LONP2
FLJ45340
PPM1B
HIRIP3
TAOK1
SAFB
DDB1
AGRN
ZNF408
EXOC2
CDC23
PHF6
LRFN4
FAM63B
MED14
ZNF419
SIPA1L3
DDAH1
PPFIA1
MLH3
PAICS
ACAD8
ZNF417
FOXG1
LEO1
MTSS1L
ARHGEF1
PDLIM5
SCRIB
RNF20
ANKS6
ZFAND3
NFRKB
MAGEF1
SAFB2
ALDH7A1
GJC1
SUZ12
PTPRA
KIF13A
TP53BP2
AKT1
HNRNPA0
MANEAL
TRIM27
ZFYVE26
RFX3
ZCCHC3
ZC3H14
ZNF333
ZXDB
DENND5A
SPTBN1
PDZD2
SOS1
FTO
ZSCAN22
MAVS
MAZ
PIK3R1
CKAP5
KCND2
PCYOX1L
OBSL1
PABPN1
HOOK2
SLC12A4
STAT5B
DYNC1LI2
QTRT1
ZFP91
SLC25A25
MED24
ULK3
SUPT5H
PJA1
SCAPER
DCPS
BRD7
PPAT
ZNF264
CHD8
CUX1
ZBTB33
NR2F1
ADNP
AP2B1
AGPAT5
ZNF431
SEMA5A
GTF3C1
RHPN2
KLC1
RNF4
ZNF133
SLC23A2
ZNF317
ARHGEF11
PBRM1
KIF22
YEATS2
PAF1
XPR1
DLC1
SEC14L1
USP4
NEDD9
UBR7
ZNF548
SDHA
ZCCHC24
CCDC14
ZBTB4
CSTF2
SLITRK3
ZNF746
C14orf135
COBRA1
ATP13A1
ATF6B
DCLRE1B
NNT
SGTA
MTA1
TRIP11
AP2A1
HIVEP1
C1orf21
ZNF793
SAP30L
KIAA1143
ZNF687
PRPF31
LMNB2
KIAA0226
MTMR9
TERF2
PTOV1
SPIRE1
SMCHD1
DDR1
TAF1C
RALGAPA2
LRRC8A
SREBF2
ASAP1
PCMTD2
KIAA0100
NSF
ZNF546
ETV1
STAU1
TMEM194A
PLEKHG2
ZNF148
ARHGAP32
ZMYND11
ZNF302
MAPK1
GRIPAP1
CCDC75
TNPO3
YLPM1
MOAP1
ATF7IP
ARHGAP5
ANKIB1
INTS3
PIK3C2B
CCDC88C
UPF1
KIAA0564
VPS13D
ZC3H18
CDH10
MMP16
SNRNP70
KIAA1549
ZNF445
TMCC1
POLA1
STK38
VANGL2
TBC1D20
UNC45A
ACLY
TRMT5
ZBTB17
CCDC144C
DHX57
GTF3C2
TRAF7
PHF10
RAPGEF2
CASK
ZNF827
TANC2
ZNF236
ZNF45
BBS1
DBN1
PCNX
SPIN3
PARP1
CTTNBP2
CEP250
VGLL4
CORO2B
MFHAS1
USP11
DHX8
POLR1B
KLHL28
ANKDD1A
FBXW8
LIX1L
TATDN2
RALGPS1
APBB2
MUM1
TRAK1
APBA1
RBM14
RASA4
PITPNA
SLC1A2
STRN4
FAM115A
SLC12A6
SH3GL1
MED16
SRPK1
NFATC2IP
QSER1
GPR98
FAM84A
KIAA1467
ADD1
MCM2
HTATSF1
CRMP1
ERBB4
MPPED2
MSI1
ZNF775
SEMA6D
C17orf70
CNOT3
CTNND2
TMEM131
SH3BP4
C16orf45
UNK
NOTCH4
NDE1
NCAPD3
PHLPP2
ZNF714
VARS2
MSH2
ZDHHC22
ZNF580
PLCG1
C19orf57
PBX1
VPS26B
BICD1
CAD
NTRK3
PAK4
GPRC5B
ZMYM3
ZMIZ1
R3HDM1
INTS4
TUBGCP5
TNFAIP1
SLC35F1
FAM199X
MTHFD1
CENPO
GATM
DZIP1
ERBB2IP
NAT10
TSPAN5
UBR5
CDC42EP4
BRCA1
USP20
TOM1L2
BTBD2
CXXC5
TMEM104
ATP13A4
MTOR
SNX27
DOCK1
CLPB
CTPS2
PRC1
FMR1
NLGN1
NPAS3
SDC3
KIAA0355
NCLN
ZGPAT
ABAT
HDAC6
KIDINS220
CDK5RAP2
ATXN7L2
GOLGA1
CCDC94
SLC41A1
GEN1
FOXO3B
CYTH2
TBCD
NEK9
SLC44A2
POLD3
KIAA0664
FAM168B
MCM4
VPS13B
LRRC16A
BTBD17
GPT2
PDGFA
IP6K1
DDAH2
SMAD3
WDHD1
EIF2C1
OLFM2
LRRN3
KBTBD11
SMO
EDC3
ADAM22
RBM42
BRD3
GNA12
WIPF2
TMEM132B
CBL
RPA1
KIAA0586
FARP1
NOTCH3
PLXNB3
BTBD9
CDC34
LRRTM2
TAF6L
DDHD1
RHOT2
TOPBP1
FZR1
WDR18
PHF19
RNF31
TFCP2
ZNF211
ATP11A
KIAA1147
SMC6
SEPT7
CNOT6
FOXN3
ZNF710
ZNF585B
ZNF48
NETO2
TLE2
RNF157
ZNF609
DCLK2
PRKD1
EXOC4
DUSP16
MARK4
ZNF343
DICER1
ATG9A
LRRC37B
MLLT6
ZMIZ2
ZNRF3
PAX6
NLGN2
GAB1
PREX1
SMC1A
ZC3H3
ZFP62
CDC42BPB
PDPR
PDIK1L
SPG7
WDR6
AMZ1
ZNF275
WRNIP1
ODZ4
CEP97
FEM1A
ZNF304
ZNF160
ZNF197
ARHGEF18
MPP5
ACSS3
PNMA1
EBF4
USP28
NOS1AP
METTL3
NPDC1
PPP2R5E
POMT1
SIPA1L1
STOX2
ZNF620
CADM4
RIMKLB
LRIG1
DVL2
STK11
SEMA6A
EXOC5
COPG2
ST3GAL2
ZNF558
AKAP6
LRP4
KIAA0195
ZNF749
VPS39
ANKFY1
ANTXR1
GABBR1
NCOA1
TBC1D24
DDX54
ERF
NAA30
C9orf114
LHX2
C6orf174
ZNF23
FKTN
MAML2
NRARP
HNRNPUL2
BTBD7
USP19
PTPN21
TECPR1
SAE1
GTPBP3
NOTCH1
RFTN2
GRIK3
POMT2
KIF7
TRIM26
SNRK
DMWD
ZNF497
PCDHGC4
VPS53
EYA2
VAC14
MEX3C
FUBP3
GPR123
EPB41L5
MVD
GLT25D2
LDOC1L
MCC
ZNF615
IPW
SCAF1
ZNF665
AKAP8L
SLC22A17
EML6
ZHX1
PIK3R2
EHMT2
USP21
RALGAPA1
ZNF592
GTPBP5
MAN2A2
DAPK1
COL5A3
UBQLN4
PRKCA
HDGFRP2
GLIS2
RHPN1
DCAF5
GPR75
CRTC1
NAP1L4
APPBP2
C11orf2
NBEA
PANK3
MOV10
FTSJD2
SURF6
TMEM59L
CDC14B
TNIK
C6orf89
ZNF554
MASP2
SRGAP3
NCKAP5L
ARHGAP39
TM9SF4
DISP2
HEG1
GMEB2
D2HGDH
COL9A3
LDLRAD3
COL11A2
CUEDC1
SCAP
FAM69B
DGCR2
FAM184A
SPPL2B
GPR37L1
FAM40B
BAHCC1
ZNF772
FOXO3
ABCA3
ATP9B
DAG1
INHBB
ASAP2
ZFYVE1
HIP1
BAI2
TSPAN11
PPP5C
ACAP3
LIG1
HMGB3
ARHGAP33
CPT1C
RBAK
ATP9A
PHLDB1
SV2A
KEAP1
ACACA
ZNF740
ABHD2
PCDHB9
HEATR6
BCORL1
GDAP1
NRM
AGAP2
SGSM2
ARHGAP23
F2R
MYO5C
CNGA3
FAM70A
POLR3B
MON1B
SRGAP1
C2orf44
NCAM1
SEMA5B
DAAM1
ZKSCAN5
ARHGEF17
SCAMP4
SCG3
RPAP1
SOX5
TSPAN12
EXT1
PARD3B
ARHGAP31
ZBTB10
ZFP64
UBTF
DOCK6
DLGAP1
FBXL7
TELO2
CD101
EEPD1
MEIS1
APC2
MED12L
MBD3
PATZ1
POLD1
MLLT1
PCDH19
SPHK2
ATRN
FBXL18
ZFHX4
LRRC14
FAM168A
GNL1
SPRY4
NUP210
POLRMT
B4GALNT4
FOXM1
TRIM39
SKI
XKR6
RAP1GAP
RAI1
FAM19A5
PTPRD
PPIL2
PTGFRN
ACTR8
IGDCC4
PNMA2
STON2
ZNF175
CAND2
LRP3
SP2
PIK3C2A
ANKFN1
ELMO2
RGS6
LPHN1
MPHOSPH9
ZNF324
SALL1
HMG20A
GPHN
CASKIN2
CSPG5
SLC12A9
ARHGEF4
AARS2
MADD
IFT140
PODXL2
ATP2B2
ZIK1
DHFRL1
NLGN3
MAD1L1
KCTD5
DMRTA2
TYK2
HDAC4
TIMP3
ZNF428
MAMLD1
C1orf187
PAG1
STMN3
ARHGEF6
RASGRP1
DPF1
MDC1
MYO18A
GPATCH1
GRIK4
NLE1
KIF5C
PPP2R5A
ABCD4
PRDM16
DAB2IP
SHISA6
KIAA0240
IQGAP2
ZNF501
AHDC1
FOXRED2
SYMPK
GNAQ
DHX35
SYT17
NKD1
FAM120C
ZNF319
FAM131B
FJX1
RGS12
PPT2
TMEM170B
ZNF662
TTC23
ZSCAN29
TAOK2
TYRO3
ERCC2
ZNF713
CCDC97
FBXO34
DCAF11
IVD
ZNF853
ADD2
CASP8AP2
ASTN1
ROBO2
MID1
WDR59
ZHX2
SASH1
MCM3
GUCY1A2
SGK223
FADS2
CDH6
EFS
TMOD2
TUBGCP3
RECQL4
NTN1
TMEM198
GPR125
DPYSL5
ACSS1
SOX8
PCDHB3
ZNF444
ZNF835
KCNQ2
MYO16
KBTBD7
CNKSR2
RGMA
SLC27A1
GNG7
SLC25A23
KIF3C
ZNF498
RHBDL3
HEPACAM
TSHZ1
MBOAT2
GPSM1
BRF1
MCF2L
SCN8A
TOP3A
RNF180
NCAPG2
SPATA5L1
TMEM161A
MAGED4B
ZNF629
UNC13A
GAS1
APBA2
EXTL3
DTX1
KCNF1
LARS2
MTX3
ZSCAN12
PIK3CB
ATXN7L1
LRRC4C
WSCD1
PNMAL1
ZNF446
CDH24
DCHS1
TBX2
FAM84B
VAV2
ALDH6A1
PHLPP1
LPL
FAM5B
PCDH1
PANK4
PPM1L
ZNF219
ZBTB47
APOLD1
TRAPPC9
GRIA2
CPNE5
KIAA0317
GLDC
ZXDA
C2orf72
SLC16A2
KCNIP1
RHOJ
TMCO7
LOC150568
PDE9A
BOP1
ABCD2
DPF3
NTM
ACSF3
NDST1
ELN
ZDHHC23
LMNB1
ZFP14
DCC
CHST10
C11orf95
CLCN2
ZFP2
LRP8
CELSR2
CPNE2
LRRN2
ZNF362
CNTFR
SOBP
THOP1
LASP1
FAM161B
TLE1
SUV39H1
MEOX2
ETV4
BLM
NACC1
FMN2
BEST3
PCYT1B
FCHSD2
SARM1
SFMBT1
CTH
EXD2
ZNF212
SLC20A2
TAF4
NAT14
PROX1
BMP7
CPNE4
GAL3ST3
SOX21
C19orf29
C17orf53
ARVCF
PITPNC1
NPNT
CDT1
ZNF17
ZNF193
NRXN2
RAB15
PRR11
NDRG4
LRRC4B
KIAA1211
EDNRB
FIZ1
PRKD2
ARID3B
TRERF1
TTYH1
BUB1
FGFR3
ZNF74
TMEM121
MLC1
SCAMP5
LFNG
FAM181B
SLC6A9
ZIC1
FKRP
C2CD4C
ZNF512B
PTCHD2
NR2E1
KLHL25
CEP78
MEN1
THSD1
SLC24A3
PDZD4
ADORA1
TMEM145
ZNF594
MDGA1
TMEM178
DIRAS1
PDE4B
ITPK1
AHCYL2
LHFPL4
CDH4
KLF15
ZNF180
ZFAT
EML5
SEZ6
ZNF671
MYT1
PLEKHG1
ADCYAP1R1
B3GAT1
ZNF30
NRG2
RYR3
CHST7
MTA2
EPHB3
LRP5
RASA3
ZBED3
AR
PLXNB1
UHRF1
CAPN10
FBN3
SLC6A1
CCDC150
BAI3
NCAN
VAV3
TLE6
CHAF1A
GTF2H4
PCDHB8
ELOVL2
ACCN4
PPFIA3
C14orf80
TRIM62
SLC38A3
NAT8L
ASPHD2
SPTBN2
TECPR2
KCNJ10
NLK
CHDH
LINGO1
RPH3A
P2RY1
ACCN2
FAM69C
GNAO1
DAGLA
OLIG2
PCDHGA1
FAM108C1
WDR62
ADCK1
DTX4
MN1
FLRT1
KCNC1
SLC6A11
CPXM1
PCDH8
COL28A1
POU3F2
CXorf1
LRFN1
PKMYT1
IGDCC3
CCDC85C
MYH7
DNASE1
TRIL
WNT7A
BZRAP1
KCNA2
ARNT2
ACSBG1
FAM182B
SALL2

## Sheet: OEG cells -CPMnorm vs scranNorm
Comparing the genes identified as overexpressed in GBM cells with high tumorigenic scores compared to those with low scores (TumHIGH and TumLOW respectively) when using CPM-normalized values or scran-normalized values
